# Supplementary material for: Regulation of presynaptic Ca2+ channel abundance at active zones through a balance of delivery and turnover
Source: eLife journal article supplement (doi:10.7554/elife.78648), 2022-07-14

*BRP<sup>Df/+</sup>*

Control

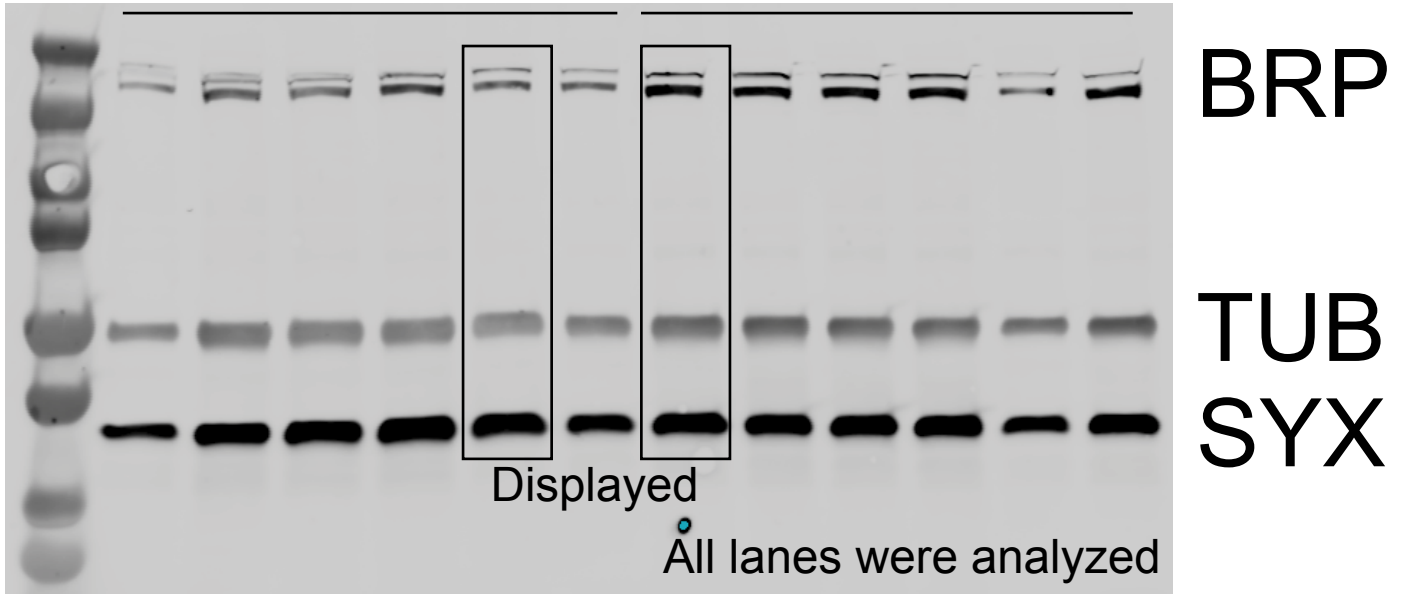

*BRP<sup>Df/+</sup>* Control

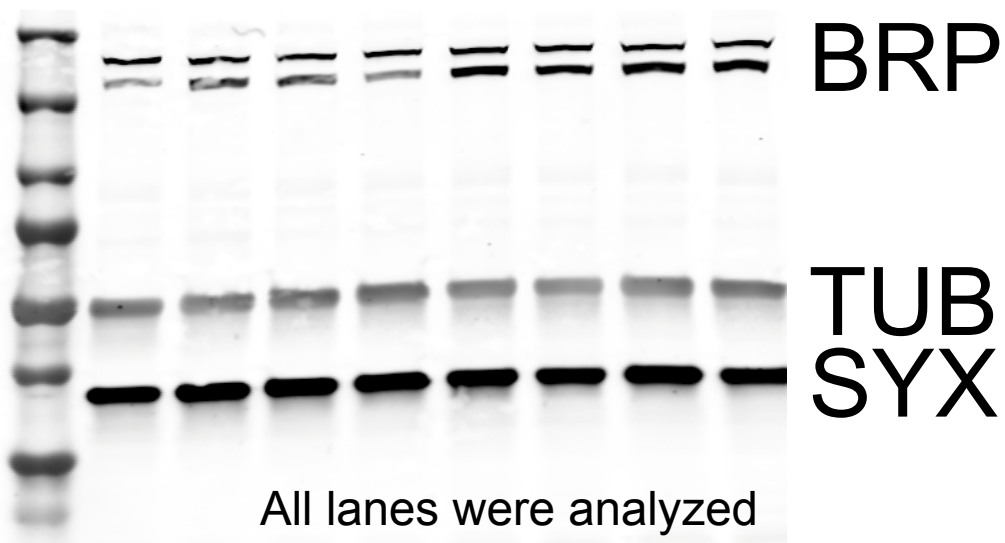

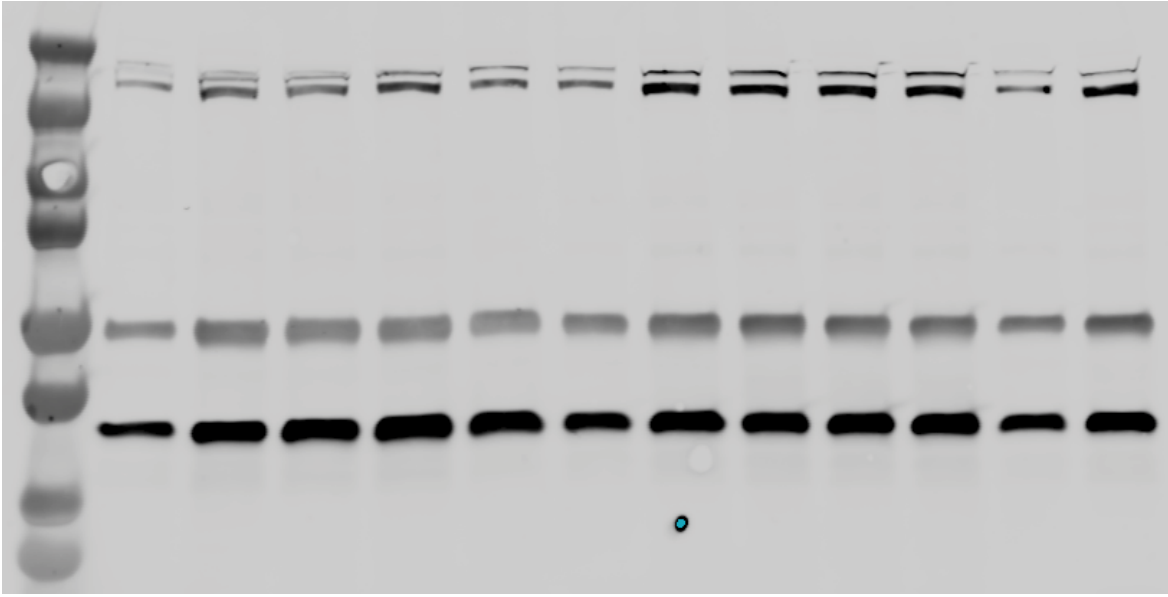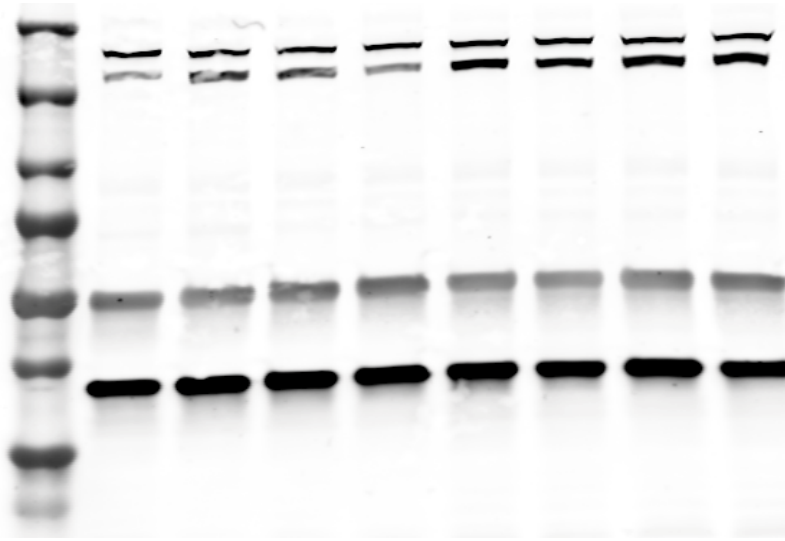

Supplement: fig4-data2 [file elife-78648-fig4-data2-v2.pdf]
