# Supplementary material for: Regulation of presynaptic Ca2+ channel abundance at active zones through a balance of delivery and turnover
Source: eLife journal article supplement (doi:10.7554/elife.78648), 2022-07-14

Control

BRP RNAi

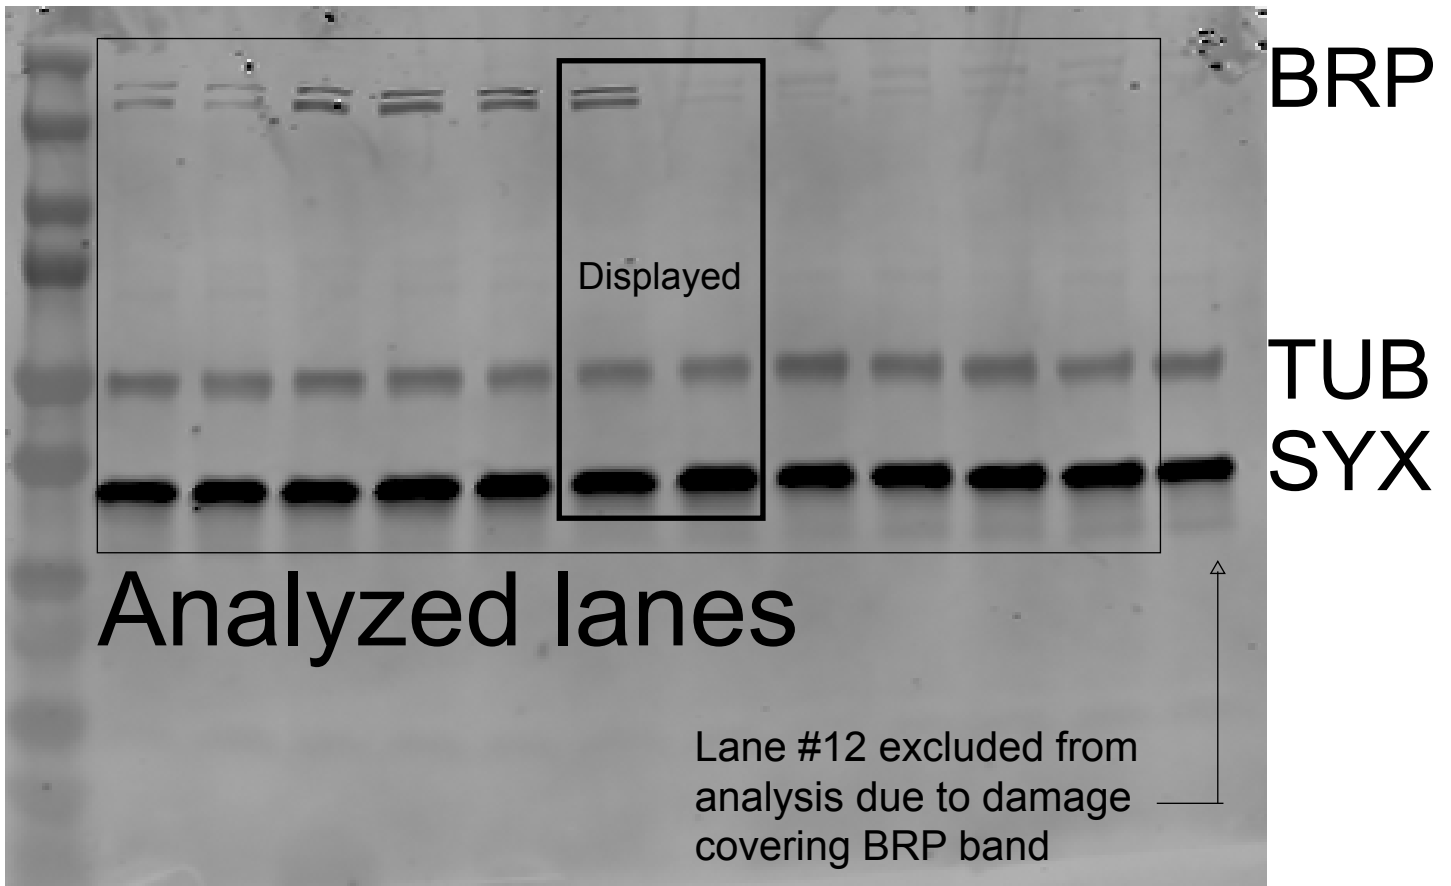

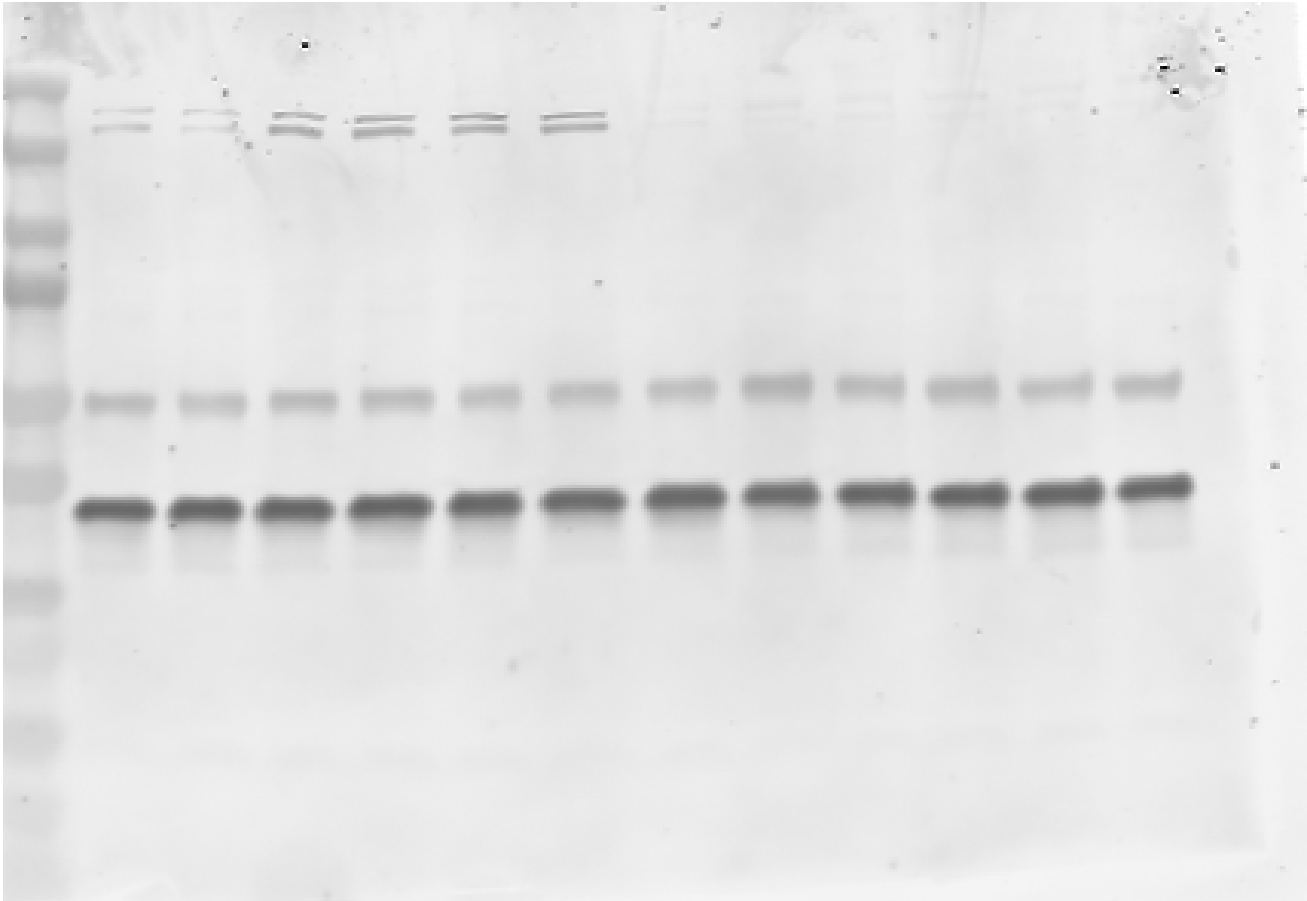

Supplement: fig4-data3 [file elife-78648-fig4-data3-v2.pdf]
