# Supplementary material for: Regulation of presynaptic Ca2+ channel abundance at active zones through a balance of delivery and turnover
Source: eLife. 2022 Jul 14;11:e78648. doi: 10.7554/eLife.78648 (PMC9352347; doi:10.7554/eLife.78648)
Supplement: Figure 1—figure supplement 1—source data 1. [file elife-78648-fig1-figsupp1-data1.xlsx]

## Sheet: Figure 1S1B
# of MN1-Ib somas flipped (out of 14)				DESCRIPTIVE STATISTICS					ANOVA						Multiple comparisons
1st instar	2nd instar	3rd instar			1st instar	early 2nd instar	3rd instar		Table Analyzed	Percent of somas (red # / 14)					Number of families	1
10	10	13		Number of values	8	8	6		Data sets analyzed	A-C					Number of comparisons per family	3
10	13	13													Alpha	0.05
12	13	13		Minimum	10	10	13		ANOVA summary
11	13	14		25% Percentile	10	12.25	13		F	11.89					Tukey's multiple comparisons test	Mean Diff.	95.00% CI of diff.	Below threshold?	Summary	Adjusted P Value
12	13	14		Median	11	13	13.5		P value	0.0004					1st instar vs. early 2nd instar	-1.75	-3.020 to -0.4798	Yes	**	0.0065	A-B
11	12	14		75% Percentile	12	13.75	14		P value summary	***					1st instar vs. 3rd instar	-2.5	-3.872 to -1.128	Yes	***	0.0005	A-C
12	14			Maximum	12	14	14		Significant diff. among means (P < 0.05)?	Yes					early 2nd instar vs. 3rd instar	-0.75	-2.122 to 0.6220	No	ns	0.3664	B-C
10	14			Range	2	4	1		R squared	0.5558
															Test details	Mean 1	Mean 2	Mean Diff.	SE of diff.	n1	n2	q	DF
				Mean	11	12.75	13.5		Brown-Forsythe test						1st instar vs. early 2nd instar	11	12.75	-1.75	0.5	8	8	4.95	19
				Std. Deviation	0.9258	1.282	0.5477		F (DFn, DFd)	0.2879 (2, 19)					1st instar vs. 3rd instar	11	13.5	-2.5	0.5401	8	6	6.547	19
				Std. Error of Mean	0.3273	0.4532	0.2236		P value	0.7531					early 2nd instar vs. 3rd instar	12.75	13.5	-0.75	0.5401	8	6	1.964	19
									P value summary	ns
									Are SDs significantly different (P < 0.05)?	No
									Bartlett's test
									Bartlett's statistic (corrected)	3.38
									P value	0.1845
									P value summary	ns
									Are SDs significantly different (P < 0.05)?	No
									ANOVA table	SS	DF	MS	F (DFn, DFd)	P value
									Treatment (between columns)	23.77	2	11.89	F (2, 19) = 11.89	P=0.0004
									Residual (within columns)	19	19	1
									Total	42.77	21
									Data summary
									Number of treatments (columns)	3
									Number of values (total)	22

## Sheet: Figure 1S1D
AZ Number				DESCRIPTIVE STATISTICS					T test						Multiple comparisons
2nd instar	3rd instar				2nd instar	3rd instar
42	290			Number of values	8	8
37	217								Table Analyzed	AZ number in 2nd instar
55	256			Minimum	37	150
53	233			25% Percentile	42.25	174.3			Column B	3rd instar
47	238			Median	50	235.5			vs.	vs.
58	250			75% Percentile	57.25	254.5			Column A	2nd instar
43	160			Maximum	63	290
63	150			Range	26	140			Unpaired t test
									P value	<0.0001
				Mean	49.75	224.3			P value summary	****
				Std. Deviation	8.924	47.74			Significantly different (P < 0.05)?	Yes
				Std. Error of Mean	3.155	16.88			One- or two-tailed P value?	Two-tailed
									t, df	t=10.16, df=14
									How big is the difference?
									Mean of column A	49.75
									Mean of column B	224.3
									Difference between means (B - A) ± SEM	174.5 ± 17.17
									95% confidence interval	137.7 to 211.3
									R squared (eta squared)	0.8806
									F test to compare variances
									F, DFn, Dfd	28.62, 7, 7
									P value	0.0002
									P value summary	***
									Significantly different (P < 0.05)?	Yes
									Data analyzed
									Sample size, column A	8
									Sample size, column B	8

## Sheet: Figure 1S1F
Avg BRP abundance					Descriptive Statistics						ANOVA						Multiple Comparisons
Control Top 50%	Flp Top 50%	Control Low 50%	Flp Low 50%			Control Top 50%	Flp Top 50%	Control Low 50%	Flp Low 50%
39063.3	30472.1	20542.1	16292.7		Number of values	12	12	12	12		Table Analyzed	Original Flp binned analysis (BRP)
36263	29833.4	18063.5	15213.1								Data sets analyzed	A-D
39720.5	32468	21145.8	15798.9		Minimum	29560	29833	15651	14326								Number of families	1
36466.5	33544.1	18885.2	17028.6		25% Percentile	35186	31380	17562	15360		ANOVA summary						Number of comparisons per family	2
33143.4	31966	17918.9	17783.6		Median	36365	34332	18394	17293		F	113.1					Alpha	0.05
36042	31184.3	19410.2	14938.8		75% Percentile	38593	37674	20259	18665		P value	<0.0001
37137.7	36255.3	18723.5	17556.4		Maximum	48020	40840	24108	22661		P value summary	****					Šídák's multiple comparisons test	Mean Diff.	95.00% CI of diff.	Below threshold?	Summary	Adjusted P Value
48020.5	35711.6	24107.9	14325.5		Range	18460	11007	8456	8336		Significant diff. among means (P < 0.05)?	Yes					Control Top 50% vs. Flp Top 50%	2321	-819.9 to 5462	No	ns	0.1794	A-B
35589.3	39840.3	17930.7	21579.3								R squared	0.8852					Control Low 50% vs. Flp Low 50%	1335	-1806 to 4477	No	ns	0.5515	C-D
29560.1	35120.5	15651.4	18605		Mean	36937	34615	18874	17539
35052	38147.3	17442.5	18685		Std. Deviation	4378	3659	2244	2566		Brown-Forsythe test						Test details	Mean 1	Mean 2	Mean Diff.	SE of diff.	n1	n2	t	DF
37180.7	40840.1	16671.8	22661.1		Std. Error of Mean	1264	1056	647.8	740.6		F (DFn, DFd)	1.028 (3, 44)					Control Top 50% vs. Flp Top 50%	36937	34615	2321	1357	12	12	1.711	44
											P value	0.3897					Control Low 50% vs. Flp Low 50%	18874	17539	1335	1357	12	12	0.9843	44
											P value summary	ns
											Are SDs significantly different (P < 0.05)?	No
											Bartlett's test
											Bartlett's statistic (corrected)	5.923
											P value	0.1154
											P value summary	ns
											Are SDs significantly different (P < 0.05)?	No
											ANOVA table	SS	DF	MS	F (DFn, DFd)	P value
											Treatment (between columns)	3747143717	3	1249047906	F (3, 44) = 113.1	P<0.0001
											Residual (within columns)	485922493	44	11043693
											Total	4233066210	47
											Data summary
											Number of treatments (columns)	4
											Number of values (total)	48

## Sheet: Figure 1S1H
Avg RBP abundance					Descriptive statistics						ANOVA multiple comparisons
Control Low 50%	Flp Low 50%	Control Top 50%	Flp Top 50%			Control Low 50%	Flp Low 50%	Control Top 50%	Flp Top 50%
13047.5	15823.5	24591.5	28862.4		Number of values	12	12	12	12		Number of families	1
14714.4	15787.6	26378.6	30578								Number of comparisons per family	2
13133.5	15540.4	25496.1	31271.5		Minimum	11628	13981	21526	28862		Alpha	0.05
13415.6	15194.9	24197.8	29100.8		25% Percentile	13069	14468	24223	29146
14114.2	17674.4	24299.4	33261.4		Median	13373	15664	25117	31131		Šídák's multiple comparisons test	Mean Diff.	95.00% CI of diff.	Below threshold?	Summary	Adjusted P Value
15129.8	14233.8	26507.5	29031.2		75% Percentile	14564	17270	26475	32917		Control Low 50% vs. Flp Low 50%	-2223	-3848 to -597.6	Yes	**	0.0056	A-B
13331	13981.2	24738.8	31884		Maximum	15279	19126	27509	35853		Control Top 50% vs. Flp Top 50%	-6246	-7871 to -4620	Yes	****	<0.0001	C-D
13315.1	14454.8	25733.1	31799.5		Range	3651	5145	5982	6991
15279.5	17860.1	27508.9	34592.6								Test details	Mean 1	Mean 2	Mean Diff.	SE of diff.	n1	n2	t	DF
13715.9	16057.5	27336.5	30990.1		Mean	13630	15853	25130	31376		Control Low 50% vs. Flp Low 50%	13630	15853	-2223	702	12	12	3.167	44
12739	14506	23245.4	29282.9		Std. Deviation	1045	1610	1733	2267		Control Top 50% vs. Flp Top 50%	25130	31376	-6246	702	12	12	8.896	44
11628	19125.7	21526.4	35853.4		Std. Error of Mean	301.6	464.9	500.2	654.6

## Sheet: Figure 1S1J
#BRP puncta lacking GluRIII per NMJ				Descriptive Statistics				T test
Control	Flp
0	4				Control	Flp
1	2			Number of values	10	9		Table Analyzed	Number BRP puncta unapposed by GluRIII
0	0
2	1			Minimum	0	0		Column B	Flp
0	0			25% Percentile	0	0		vs.	vs.
2	0			Median	1	1		Column A	Control
1	0			75% Percentile	1.25	2
1	2			Maximum	2	4		Unpaired t test
1	2			Range	2	4		P value	0.4215
0								P value summary	ns
				Mean	0.8	1.222		Significantly different (P < 0.05)?	No
				Std. Deviation	0.7888	1.394		One- or two-tailed P value?	Two-tailed
				Std. Error of Mean	0.2494	0.4648		t, df	t=0.8238, df=17
								How big is the difference?
								Mean of column A	0.8
								Mean of column B	1.222
								Difference between means (B - A) ± SEM	0.4222 ± 0.5126
								95% confidence interval	-0.6592 to 1.504
								R squared (eta squared)	0.03838
								F test to compare variances
								F, DFn, Dfd	3.125, 8, 9
								P value	0.1094
								P value summary	ns
								Significantly different (P < 0.05)?	No
								Data analyzed
								Sample size, column A	10
								Sample size, column B	9

## Sheet: Figure 1S1K
Number of GluRIII puncta lacking BRP				Descriptive statistics				T test
Control	Flp				Control	Flp
11	8			Number of values	9	9		Table Analyzed	Number GLuRIII puncta unapposed by BRP
2	11
6	9			Minimum	2	8		Column B	Flp
14	8			25% Percentile	5	8		vs.	vs.
21	8			Median	8	9		Column A	Control
8	9			75% Percentile	12.5	13
8	11			Maximum	21	20		Unpaired t test
4	15			Range	19	12		P value	0.3831
6	20							P value summary	ns
				Mean	8.889	11		Significantly different (P < 0.05)?	No
				Std. Deviation	5.776	4.062		One- or two-tailed P value?	Two-tailed
				Std. Error of Mean	1.925	1.354		t, df	t=0.8969, df=16
								How big is the difference?
								Mean of column A	8.889
								Mean of column B	11
								Difference between means (B - A) ± SEM	2.111 ± 2.354
								95% confidence interval	-2.879 to 7.101
								R squared (eta squared)	0.04787
								F test to compare variances
								F, DFn, Dfd	2.022, 8, 8
								P value	0.3392
								P value summary	ns
								Significantly different (P < 0.05)?	No
								Data analyzed
								Sample size, column A	9
								Sample size, column B	9
