# Supplementary material for: Regulation of presynaptic Ca2+ channel abundance at active zones through a balance of delivery and turnover
Source: eLife. 2022 Jul 14;11:e78648. doi: 10.7554/eLife.78648 (PMC9352347; doi:10.7554/eLife.78648)
Supplement: Figure 1—source data 1. [file elife-78648-fig1-data1.xlsx]

## Sheet: Figure 1C
TEVC Evoked EJC Peak (nA)						DESCRIPTIVE STATISTICS					ANOVA Test						MULTIPLE COMPARISON TEST
CTRL (Ib & Is)	CTRL (Ib-only)	Flp (Ib & Is)	Flp (Ib-only)								Table Analyzed	TEVC Quant - PEAK
52.3764	27.8831	13.8949	4.6979			CTRL (Ib & Is)	CTRL (Ib-only)	Flp (Ib & Is)	Flp (Ib-only)		Data sets analyzed	A-D					Number of families	1
41.1845	24.5203	5.78583	4.18318		Number of values	8	6	15	5								Number of comparisons per family	4
40.9735	37.4642	3.65838	7.61714								ANOVA summary						Alpha	0.05
38.317	38.9973	11.0668	3.7913		Minimum	37.22	24.52	3.658	3.791		F	65.4
37.2217	34.8957	19.1477	8.4579		25% Percentile	38.12	27.04	11.07	3.987		P value	<0.0001					Šídák's multiple comparisons test	Mean Diff.	95.00% CI of diff.	Below threshold?	Summary	Adjusted P Value
38.0588	30.1877	18.4144			Median	41.08	32.54	14.7	4.698		P value summary	****					No Flp Both vs. Flp Both	26.98	20.64 to 33.32	Yes	****	<0.0001	A-C
43.9811		12.4019			75% Percentile	44.57	37.85	19.15	8.038		Significant diff. among means (P < 0.05)?	Yes					No Flp 1b vs. Flp 1b	26.58	17.81 to 35.34	Yes	****	<0.0001	B-D
44.7658		24.0714			Maximum	52.38	39	25.14	8.458		R squared	0.8674					No Flp Both vs. No Flp 1b	9.785	1.966 to 17.60	Yes	**	0.0096	A-B
		11.5485			Range	15.15	14.48	21.48	4.667								Flp Both vs. Flp 1b	9.383	1.907 to 16.86	Yes	**	0.0093	C-D
		14.6959									Brown-Forsythe test
		19.0015			Mean	42.11	32.32	15.13	5.749		F (DFn, DFd)	1.682 (3, 30)					Test details	Mean 1	Mean 2	Mean Diff.	SE of diff.	n1	n2	t	DF
		21.2064			Std. Deviation	4.968	5.705	6.222	2.134		P value	0.192					No Flp Both vs. Flp Both	42.11	15.13	26.98	2.392	8	15	11.28	30
		25.1432			Std. Error of Mean	1.757	2.329	1.607	0.9544		P value summary	ns					No Flp 1b vs. Flp 1b	32.32	5.749	26.58	3.309	6	5	8.031	30
		10.3022									Are SDs significantly different (P < 0.05)?	No					No Flp Both vs. No Flp 1b	42.11	32.32	9.785	2.951	8	6	3.316	30
		16.6455															Flp Both vs. Flp 1b	15.13	5.749	9.383	2.822	15	5	3.325	30
											Bartlett's test
											Bartlett's statistic (corrected)	4.473
											P value	0.2147
											P value summary	ns
											Are SDs significantly different (P < 0.05)?	No
											ANOVA table	SS	DF	MS	F (DFn, DFd)	P value
											Treatment (between columns)	5859	3	1953	F (3, 30) = 65.40	P<0.0001
											Residual (within columns)	895.8	30	29.86
											Total	6755	33
											Data summary
											Number of treatments (columns)	4

## Sheet: Figure 1D
HRP Area (square microns)					DESCRIPTIVE STATISTICS						ANOVA TEST						MULTIPLE COMPARISONS
											Table Analyzed	HRP AREA (square microns)					Number of families	1
CTRL (Ib & Is)	CTRL (Ib-only)	Flp (Ib & Is)	Flp (Ib-only)			CTRL (Ib & Is)	CTRL (Ib-only)	Flp (Ib & Is)	Flp (Ib-only)		Data sets analyzed	A-D					Number of comparisons per family	2
263.15	248.638	171.853	175.11		Number of values	8	6	9	5								Alpha	0.05
221.786	170.082	150.257	278.766								ANOVA summary
236.622	185.66	164.75	128.071		Minimum	154.8	131	139.5	128.1		F	0.5082					Šídák's multiple comparisons test	Mean Diff.	95.00% CI of diff.	Below threshold?	Summary	Adjusted P Value
163.093	130.985	171.567	178.099		25% Percentile	172.9	160.3	157.5	151.6		P value	0.6804					CTRL (Ib & Is) vs. Flp (Ib & Is)	28.63	-34.91 to 92.18	No	ns	0.5004	A-C
154.809	233.765	219.006	184.974		Median	229.2	209.7	171.6	178.1		P value summary	ns					CTRL (Ib-only) vs. Flp (Ib-only)	18.82	-60.37 to 98.00	No	ns	0.8203	B-D
269.911	277.795	169.663			75% Percentile	257.6	255.9	198.7	231.9		Significant diff. among means (P < 0.05)?	No
240.869		178.347			Maximum	269.9	277.8	349.1	278.8		R squared	0.05973					Test details	Mean 1	Mean 2	Mean Diff.	SE of diff.	n1	n2	t	DF
202.4		139.497			Range	115.1	146.8	209.6	150.7								CTRL (Ib & Is) vs. Flp (Ib & Is)	219.1	190.4	28.63	26.64	8	9	1.075	24
		349.077									Brown-Forsythe test						CTRL (Ib-only) vs. Flp (Ib-only)	207.8	189	18.82	33.2	6	5	0.5668	24
					Mean	219.1	207.8	190.4	189		F (DFn, DFd)	0.1516 (3, 24)
					Std. Deviation	42.86	54.87	63.37	55		P value	0.9276
					Std. Error of Mean	15.15	22.4	21.12	24.59		P value summary	ns
											Are SDs significantly different (P < 0.05)?	No
											Bartlett's test
											Bartlett's statistic (corrected)	1.019
											P value	0.7966
											P value summary	ns
											Are SDs significantly different (P < 0.05)?	No
											ANOVA table	SS	DF	MS	F (DFn, DFd)	P value
											Treatment (between columns)	4583	3	1528	F (3, 24) = 0.5082	P=0.6804
											Residual (within columns)	72143	24	3006
											Total	76726	27
											Data summary
											Number of treatments (columns)	4
											Number of values (total)	28

## Sheet: Figure 1E
AZ Number					DESCRIPTIVE STATISTICS							ANOVA							MULTIPLE COMPARISONS
												Table Analyzed	AZ number						Number of families	1
CTRL (Ib & Is)	CTRL (Ib-only)	Flp (Ib & Is)	Flp (Ib-only)			CTRL (Ib & Is)	CTRL (Ib-only)	Flp (Ib & Is)	Flp (Ib-only)			Data sets analyzed	A-D						Number of comparisons per family	2
290	305	288	220		Number of values	8	6	8	5										Alpha	0.05
217	226	263	243									ANOVA summary
256	269	235	170		Minimum	150	209	198	170			F	1.389						Šídák's multiple comparisons test	Mean Diff.	95.00% CI of diff.	Below threshold?	Summary	Adjusted P Value
233	209	254	244		25% Percentile	174.3	216.5	239.8	195			P value	0.2713						CTRL (Ib & Is) vs. Flp (Ib & Is)	-30.88	-75.37 to 13.62	No	ns	0.2088	A-C
238	219	257	225		Median	235.5	236.5	259	225			P value summary	ns						CTRL (Ib-only) vs. Flp (Ib-only)	25.43	-28.45 to 79.32	No	ns	0.4679	B-D
250	247	198			75% Percentile	254.5	278	279.5	243.5			Significant diff. among means (P < 0.05)?	No
160		285			Maximum	290	305	288	244			R squared	0.1534						Test details	Mean 1	Mean 2	Mean Diff.	SE of diff.	n1	n2	t	DF
150		261			Range	140	96	90	74										CTRL (Ib & Is) vs. Flp (Ib & Is)	224.3	255.1	-30.88	18.6	8	8	1.66	23
												Brown-Forsythe test							CTRL (Ib-only) vs. Flp (Ib-only)	245.8	220.4	25.43	22.53	6	5	1.129	23
					Mean	224.3	245.8	255.1	220.4			F (DFn, DFd)	0.6007 (3, 23)
					Std. Deviation	47.74	36.08	28.64	30.12			P value	0.6211
					Std. Error of Mean	16.88	14.73	10.13	13.47			P value summary	ns
												Are SDs significantly different (P < 0.05)?	No
												Bartlett's test
												Bartlett's statistic (corrected)	2.011
												P value	0.5701
												P value summary	ns
												Are SDs significantly different (P < 0.05)?	No
												ANOVA table	SS	DF	MS	F (DFn, DFd)	P value
												Treatment (between columns)	5768	3	1923	F (3, 23) = 1.389	P=0.2713
												Residual (within columns)	31834	23	1384
												Total	37603	26
												Data summary
												Number of treatments (columns)	4
												Number of values (total)	27

## Sheet: Figure 1H
Avg AZ BRP			DESCRIPTIVE STATISTICS				T TEST
							Table Analyzed	BRP averages
Control	Flip			Control	Flip
29673	23281		Number of values	12	12		Column B	Flip
26899	22391						vs.	vs.
30257	24045		Minimum	22553	22391		Column A	Control
27482	25124		25% Percentile	26331	23472
25448	24754		Median	27191	25002		Unpaired t test
27685	22987		75% Percentile	29176	27873		P value	0.1602
27627	26766		Maximum	35466	31517		P value summary	ns
35466	24879		Range	12913	9126		Significantly different (P < 0.05)?	No
26716	30525						One- or two-tailed P value?	Two-tailed
26823	26816		Mean	27736	25943		t, df	t=1.454, df=22
22553	28225		Std. Deviation	3118	2923
26203	31517		Std. Error of Mean	900.2	843.7		How big is the difference?
							Mean of column A	27736
							Mean of column B	25943
							Difference between means (B - A) ± SEM	-1794 ± 1234
							95% confidence interval	-4352 to 765.2
							R squared (eta squared)	0.08763
							F test to compare variances
							F, DFn, Dfd	1.138, 11, 11
							P value	0.8338
							P value summary	ns
							Significantly different (P < 0.05)?	No
							Data analyzed
							Sample size, column A	12
							Sample size, column B	12

## Sheet: Figure 1I
Avg. AZ RBP			DESCRIPTIVE STATISTICS				T TEST
							Table Analyzed	RBP averages
Control	Flip			Control	Flip
20810	22301		Number of values	12	12		Column B	Flip
19644	23182						vs.	vs.
21317	23405		Minimum	16561	21599		Column A	Control
20165	22116		25% Percentile	19141	22162
19460	25467		Median	20312	23130		Unpaired t test
19034	21599		75% Percentile	20806	24972		P value	<0.0001
20794	22892		Maximum	22176	27470		P value summary	****
22176	23078		Range	5615	5871		Significantly different (P < 0.05)?	Yes
20459	26226						One- or two-tailed P value?	Two-tailed
20526	23486		Mean	19910	23593		t, df	t=5.347, df=22
17973	21894		Std. Deviation	1521	1838
16561	27470		Std. Error of Mean	439.2	530.6		How big is the difference?
							Mean of column A	19910
							Mean of column B	23593
							Difference between means (B - A) ± SEM	3683 ± 688.8
							95% confidence interval	2255 to 5112
							R squared (eta squared)	0.5652
							F test to compare variances
							F, DFn, Dfd	1.460, 11, 11
							P value	0.541
							P value summary	ns
							Significantly different (P < 0.05)?	No
							Data analyzed
							Sample size, column A	12
							Sample size, column B	12

## Sheet: Figure 1K
Avg Bouton SYX1			DESCRIPTIVE STATISTICS				T TEST
							Table Analyzed	Syx1a 647 (GFP Objects mean NMJ)
Control	Flip			Control	Flip
15715	20022		Number of values	9	12		Column B	Flip
13872	18320						vs.	vs.
14242	15367		Minimum	13862	13617		Column A	Control
18366	13617		25% Percentile	14057	15286
18851	16543		Median	15715	17432		Unpaired t test
13862	18988		75% Percentile	18432	19611		P value	0.1756
16034	20137		Maximum	18851	20137		P value summary	ns
14812	15232		Range	4989	6520		Significantly different (P < 0.05)?	No
18497	15259						One- or two-tailed P value?	Two-tailed
	16405		Mean	16028	17365		t, df	t=1.407, df=19
	19818		Std. Deviation	2051	2229
	18673		Std. Error of Mean	683.5	643.4		How big is the difference?
							Mean of column A	16028
							Mean of column B	17365
							Difference between means (B - A) ± SEM	1337 ± 950.5
							95% confidence interval	-652.2 to 3327
							R squared (eta squared)	0.09434
							F test to compare variances
							F, DFn, Dfd	1.181, 11, 8
							P value	0.8331
							P value summary	ns
							Significantly different (P < 0.05)?	No
							Data analyzed
							Sample size, column A	9
							Sample size, column B	12

## Sheet: Figure 1L
Avg. Bouton CPX			DESCRIPTIVE STATISTICS				T TEST
							Table Analyzed	cpx 488 (GFP Objects mean NMJ)
Control	Flip			Control	Flip
21119	20322		Number of values	9	12		Column B	Flip
18700	21101						vs.	vs.
17257	18264		Minimum	16261	14226		Column A	Control
20765	14226		25% Percentile	17855	16071
18636	19107		Median	18640	17740		Unpaired t test
16261	17215		75% Percentile	20112	20146		P value	0.3502
18452	20933		Maximum	21119	21101		P value summary	ns
18640	16806		Range	4858	6875		Significantly different (P < 0.05)?	No
19458	15826						One- or two-tailed P value?	Two-tailed
	15047		Mean	18810	17961		t, df	t=0.9579, df=19
	19616		Std. Deviation	1528	2298
	17065		Std. Error of Mean	509.4	663.5		How big is the difference?
							Mean of column A	18810
							Mean of column B	17961
							Difference between means (B - A) ± SEM	-849.1 ± 886.5
							95% confidence interval	-2705 to 1006
							R squared (eta squared)	0.04606
							F test to compare variances
							F, DFn, Dfd	2.262, 11, 8
							P value	0.2563
							P value summary	ns
							Significantly different (P < 0.05)?	No
							Data analyzed
							Sample size, column A	9
							Sample size, column B	12
