# Supplementary material for: Regulation of presynaptic Ca2+ channel abundance at active zones through a balance of delivery and turnover
Source: eLife. 2022 Jul 14;11:e78648. doi: 10.7554/eLife.78648 (PMC9352347; doi:10.7554/eLife.78648)
Supplement: Figure 2—source data 1. [file elife-78648-fig2-data1.xlsx]

## Sheet: Figure 2B
LLL NMJ Area			DESCRIPTIVE STATISTICS				T TEST
				Day 6	Day 16		Table Analyzed	LLL_HRP_Area (px * .138^2)
Day 6	Day 16		Number of values	8	8
130.375	289.031						Column B	Day 16
124.262	333.232		Minimum	124.3	263.1		vs.	vs.
253.019	331.727		25% Percentile	133	271.2		Column A	Day 6
176.062	359.436		Median	155.6	332.5
141.021	263.15		75% Percentile	209.4	348.7		Unpaired t test
153.971	350.981		Maximum	253	359.4		P value	<0.0001
220.453	341.992		Range	128.8	96.29		P value summary	****
157.17	265.321						Significantly different (P < 0.05)?	Yes
			Mean	169.5	316.9		One- or two-tailed P value?	Two-tailed
			Std. Deviation	45.35	38.57		t, df	t=6.999, df=14
			Std. Error of Mean	16.03	13.64
							How big is the difference?
							Mean of column A	169.5
							Mean of column B	316.9
							Difference between means (B - A) ± SEM	147.3 ± 21.05
							95% confidence interval	102.2 to 192.5
							R squared (eta squared)	0.7777
							F test to compare variances
							F, DFn, Dfd	1.382, 7, 7
							P value	0.6799
							P value summary	ns
							Significantly different (P < 0.05)?	No
							Data analyzed
							Sample size, column A	8
							Sample size, column B	8

## Sheet: Figure 2C
LLL AZ Number			DESCRIPTIVE STATISTICS				T TEST
Day 6	Day 16			Day 6	Day 16		Table Analyzed	LLL_AZ_Number
226	498		Number of values	8	8
228	557						Column B	Day 16
380	563		Minimum	211	395		vs.	vs.
258	591		25% Percentile	218.5	425		Column A	Day 6
211	395		Median	243	519
216	491		75% Percentile	290.5	561.5		Unpaired t test
280	540		Maximum	380	591		P value	<0.0001
294	403		Range	169	196		P value summary	****
							Significantly different (P < 0.05)?	Yes
			Mean	261.6	504.8		One- or two-tailed P value?	Two-tailed
			Std. Deviation	56.64	73.13		t, df	t=7.434, df=14
			Std. Error of Mean	20.02	25.86
							How big is the difference?
							Mean of column A	261.6
							Mean of column B	504.8
							Difference between means (B - A) ± SEM	243.1 ± 32.70
							95% confidence interval	173.0 to 313.3
							R squared (eta squared)	0.7979
							F test to compare variances
							F, DFn, Dfd	1.667, 7, 7
							P value	0.5162
							P value summary	ns
							Significantly different (P < 0.05)?	No
							Data analyzed
							Sample size, column A	8
							Sample size, column B	8

## Sheet: Figure 2F
LLL Evoked Peak Current			DESCRIPTIVE STATISTICS				T TEST
Day 6	Day 16			Day 6	Day 16		Table Analyzed	LLL_EJC_Peak_Current
36.3269	56.3422		Number of values	8	8
59.9067	88.2231						Column B	Day 16
30.3393	80.5598		Minimum	24.34	56.34		vs.	vs.
24.3381	96.1001		25% Percentile	27.43	63.73		Column A	Day 6
26.4638	65.0782		Median	34.48	80.07
32.6309	63.2744		75% Percentile	48.59	94.13		Unpaired t test
47.0371	79.5703		Maximum	59.91	97.65		P value	<0.0001
49.1055	97.6451		Range	35.57	41.3		P value summary	****
							Significantly different (P < 0.05)?	Yes
			Mean	38.27	78.35		One- or two-tailed P value?	Two-tailed
			Std. Deviation	12.5	15.49		t, df	t=5.695, df=14
			Std. Error of Mean	4.421	5.476
							How big is the difference?
							Mean of column A	38.27
							Mean of column B	78.35
							Difference between means (B - A) ± SEM	40.08 ± 7.037
							95% confidence interval	24.99 to 55.17
							R squared (eta squared)	0.6985
							F test to compare variances
							F, DFn, Dfd	1.534, 7, 7
							P value	0.5862
							P value summary	ns
							Significantly different (P < 0.05)?	No
							Data analyzed
							Sample size, column A	8
							Sample size, column B	8

## Sheet: Figure 2G
LLL Mini Peak (nA)			Descriptive Statistics				T test
D6	D16			D6	D16
0.458277	0.699678		Number of values	8	8		Table Analyzed	Mini peak
0.504622	0.624712
0.568118	0.654299		Minimum	0.4183	0.5961		Column B	D16
0.42075	0.820114		25% Percentile	0.4301	0.6221		vs.	vs.
0.477629	0.673229		Median	0.4893	0.6638		Column A	D6
0.418279	0.785083		75% Percentile	0.532	0.7637
0.500916	0.621209		Maximum	0.5681	0.8201		Unpaired t test
0.541124	0.596136		Range	0.1498	0.224		P value	<0.0001
							P value summary	****
			Mean	0.4862	0.6843		Significantly different (P < 0.05)?	Yes
			Std. Deviation	0.0535	0.08033		One- or two-tailed P value?	Two-tailed
			Std. Error of Mean	0.01891	0.0284		t, df	t=5.806, df=14
							How big is the difference?
							Mean of column A	0.4862
							Mean of column B	0.6843
							Difference between means (B - A) ± SEM	0.1981 ± 0.03412
							95% confidence interval	0.1249 to 0.2713
							R squared (eta squared)	0.7065
							F test to compare variances
							F, DFn, Dfd	2.255, 7, 7
							P value	0.3056
							P value summary	ns
							Significantly different (P < 0.05)?	No
							Data analyzed
							Sample size, column A	8
							Sample size, column B	8

## Sheet: Figure 2H
LLL Quantal Content (by peak)			Descriptive statistics				T test
D6	D16			D6	D16
79.2684	80.5259		Number of values	8	8
118.716	141.222						Table Analyzed	QC peak
53.4032	123.124		Minimum	53.4	80.53
57.8446	117.179		25% Percentile	56.02	84.61		Column B	D16
55.4066	96.6658		Median	78.64	120.2		vs.	vs.
78.0123	80.5958		75% Percentile	93.11	137.9		Column A	D6
93.9022	128.089		Maximum	118.7	163.8
90.7472	163.797		Range	65.31	83.27		Unpaired t test
							P value	0.0116
			Mean	78.41	116.4		P value summary	*
			Std. Deviation	22.66	29.29		Significantly different (P < 0.05)?	Yes
			Std. Error of Mean	8.012	10.35		One- or two-tailed P value?	Two-tailed
							t, df	t=2.902, df=14
							How big is the difference?
							Mean of column A	78.41
							Mean of column B	116.4
							Difference between means (B - A) ± SEM	37.99 ± 13.09
							95% confidence interval	9.908 to 66.07
							R squared (eta squared)	0.3755
							F test to compare variances
							F, DFn, Dfd	1.670, 7, 7
							P value	0.5149
							P value summary	ns
							Significantly different (P < 0.05)?	No
							Data analyzed
							Sample size, column A	8
							Sample size, column B	8

## Sheet: Figure 2I
LLL Mini Frequency			DESCRIPTIVE STATISTICS				T TEST
Day 6	Day 16			Day 6	Day 16		Table Analyzed	LLL_Mini_Freqency
1.33333	2.16667		Number of values	8	8
1.7	3.06667						Column B	Day 16
1.66667	2.13333		Minimum	0.6	1.586		vs.	vs.
0.6	1.58621		25% Percentile	1.233	2.058		Column A	Day 6
1.2	3.1		Median	1.568	2.617
1.46875	4.46667		75% Percentile	1.9	3.35		Unpaired t test
3	2.03226		Maximum	3	4.467		P value	0.0161
1.96667	3.43333		Range	2.4	2.88		P value summary	*
							Significantly different (P < 0.05)?	Yes
			Mean	1.617	2.748		One- or two-tailed P value?	Two-tailed
			Std. Deviation	0.6923	0.9432		t, df	t=2.735, df=14
			Std. Error of Mean	0.2448	0.3335
							How big is the difference?
							Mean of column A	1.617
							Mean of column B	2.748
							Difference between means (B - A) ± SEM	1.131 ± 0.4136
							95% confidence interval	0.2440 to 2.018
							R squared (eta squared)	0.3482
							F test to compare variances
							F, DFn, Dfd	1.856, 7, 7
							P value	0.4333
							P value summary	ns
							Significantly different (P < 0.05)?	No
							Data analyzed
							Sample size, column A	8
							Sample size, column B	8

## Sheet: Figure 2K
LLL Sum NMJ Cac			DESCRIPTIVE STATISTICS				T TEST
Day 6	Day 16			Day 6	Day 16		Table Analyzed	LLL_Total_Cac
2.26477e+07	5.87149e+07		Number of values	8	8
2.97326e+07	7.54516e+07						Column B	Day 16
3.88084e+07	6.06485e+07		Minimum	22647660	43104953		vs.	vs.
4.01416e+07	69756644		25% Percentile	23037142	49492108		Column A	Day 6
2.27586e+07	4.88375e+07		Median	29642683	59681680
2.38727e+07	5.1456e+07		75% Percentile	38199827	68918732		Unpaired t test
3.6374e+07	6.6405e+07		Maximum	40141613	75451643		P value	<0.0001
2.95527e+07	4.3105e+07		Range	17493953	32346690		P value summary	****
							Significantly different (P < 0.05)?	Yes
			Mean	30486042	59296888		One- or two-tailed P value?	Two-tailed
			Std. Deviation	7206036	11059130		t, df	t=6.174, df=14
			Std. Error of Mean	2547718	3909993
							How big is the difference?
							Mean of column A	30486042
							Mean of column B	59296888
							Difference between means (B - A) ± SEM	28810846 ± 4666789
							95% confidence interval	18801580 to 38820112
							R squared (eta squared)	0.7314
							F test to compare variances
							F, DFn, Dfd	2.355, 7, 7
							P value	0.281
							P value summary	ns
							Significantly different (P < 0.05)?	No
							Data analyzed
							Sample size, column A	8
							Sample size, column B	8

## Sheet: Figure 2L
LLL Avg. AZ Cac			DESCRIPTIVESTATISTICS				T TEST
Day 6	Day 16			Day 6	Day 16		Table Analyzed	LLL_Ave_Cac_MAX
13590.5	16820.6		Number of values	8	8
18176.5	17098.4						Column B	Day 16
13748.5	16854.7		Minimum	12863	15082		vs.	vs.
17441.5	17126.2		25% Percentile	13612	15400		Column A	Day 6
12862.6	16376.3		Median	13842	16598
13676.4	15717.1		75% Percentile	17340	17037		Unpaired t test
17034.5	15295		Maximum	18176	17126		P value	0.1444
13935.2	15081.7		Range	5314	2044		P value summary	ns
							Significantly different (P < 0.05)?	No
			Mean	15058	16296		One- or two-tailed P value?	Two-tailed
			Std. Deviation	2110	822.8		t, df	t=1.546, df=14
			Std. Error of Mean	746.1	290.9
							How big is the difference?
							Mean of column A	15058
							Mean of column B	16296
							Difference between means (B - A) ± SEM	1238 ± 800.8
							95% confidence interval	-479.4 to 2956
							R squared (eta squared)	0.1458
							F test to compare variances
							F, DFn, Dfd	6.578, 7, 7
							P value	0.0238
							P value summary	*
							Significantly different (P < 0.05)?	Yes
							Data analyzed
							Sample size, column A	8
							Sample size, column B	8

## Sheet: Figure 2N
LLL Sum NMJ BRP			DESCRIPTIVE STATISTICS				T TEST
Day 6	Day 16			Day 6	Day 16		Table Analyzed	LLL_Total_BRP
1.72489e+07	9.86997e+07		Number of values	8	8
2.71203e+07	9.47497e+07						Column B	Day 16
3.69164e+07	5.84999e+07		Minimum	16967944	58499905		vs.	vs.
4.76287e+07	99492532		25% Percentile	17490091	68654427		Column A	Day 6
1.8795e+07	9.43356e+07		Median	22957602	94542663
1.82136e+07	1.1066e+08		75% Percentile	38045430	99294334		Unpaired t test
3.84218e+07	7.80609e+07		Maximum	47628709	110660062		P value	<0.0001
1.69679e+07	6.55189e+07		Range	30660764	52160156		P value summary	****
							Significantly different (P < 0.05)?	Yes
			Mean	27664071	87502172		One- or two-tailed P value?	Two-tailed
			Std. Deviation	11898811	18198104		t, df	t=7.784, df=14
			Std. Error of Mean	4206865	6434001
							How big is the difference?
							Mean of column A	27664071
							Mean of column B	87502172
							Difference between means (B - A) ± SEM	59838101 ± 7687268
							95% confidence interval	43350552 to 76325650
							R squared (eta squared)	0.8123
							F test to compare variances
							F, DFn, Dfd	2.339, 7, 7
							P value	0.2847
							P value summary	ns
							Significantly different (P < 0.05)?	No
							Data analyzed
							Sample size, column A	8
							Sample size, column B	8

## Sheet: Figure 2O
LLL Avg. AZ BRP			DESCRIPTIVE STATISTICS				T TEST
Day 6	Day 16			Day 6	Day 16		Table Analyzed	LLL_Ave_BRP_MAX
8377.15	20401.2		Number of values	8	8
13592.9	17752						Column B	Day 16
10318.2	12011.5		Minimum	6600	12011		vs.	vs.
17613	18397.2		25% Percentile	8373	15478		Column A	Day 6
9290.69	22100.2		Median	9804	18075
8370.96	20946.1		75% Percentile	14567	20810		Unpaired t test
14891.3	14820.4		Maximum	17613	22100		P value	0.0019
6599.55	17451.4		Range	11013	10089		P value summary	**
							Significantly different (P < 0.05)?	Yes
			Mean	11132	17985		One- or two-tailed P value?	Two-tailed
			Std. Deviation	3817	3333		t, df	t=3.825, df=14
			Std. Error of Mean	1350	1178
							How big is the difference?
							Mean of column A	11132
							Mean of column B	17985
							Difference between means (B - A) ± SEM	6853 ± 1792
							95% confidence interval	3011 to 10696
							R squared (eta squared)	0.511
							F test to compare variances
							F, DFn, Dfd	1.312, 7, 7
							P value	0.7293
							P value summary	ns
							Significantly different (P < 0.05)?	No
							Data analyzed
							Sample size, column A	8
							Sample size, column B	8

[truncated: 4 more sheets: Figure 2R, Figure 2T, Figure 2U, Figure 2W]
