# Supplementary material for: Regulation of presynaptic Ca2+ channel abundance at active zones through a balance of delivery and turnover
Source: eLife. 2022 Jul 14;11:e78648. doi: 10.7554/eLife.78648 (PMC9352347; doi:10.7554/eLife.78648)
Supplement: Figure 3—figure supplement 1—source data 1. [file elife-78648-fig3-figsupp1-data1.xlsx]

## Sheet: Figure 3S1B
AZ number			Descriptive statistics				T test
White	CacC-GFP			White	CacC-GFP
213	380		Number of values	13	13		Table Analyzed	AZ number
433	361
402	301		Minimum	213	235		Column B	CacC-GFP
346	286		25% Percentile	318	265		vs.	vs.
285	304		Median	391	297		Column A	White
307	243		75% Percentile	417.5	344.5
329	289		Maximum	485	380		Unpaired t test
334	292		Range	272	145		P value	0.0127
485	244						P value summary	*
391	235		Mean	365.8	301.6		Significantly different (P < 0.05)?	Yes
401	354		Std. Deviation	72.74	45.87		One- or two-tailed P value?	Two-tailed
397	297		Std. Error of Mean	20.17	12.72		t, df	t=2.693, df=24
433	335
							How big is the difference?
							Mean of column A	365.8
							Mean of column B	301.6
							Difference between means (B - A) ± SEM	-64.23 ± 23.85
							95% confidence interval	-113.5 to -15.01
							R squared (eta squared)	0.2321
							F test to compare variances
							F, DFn, Dfd	2.515, 12, 12
							P value	0.1239
							P value summary	ns
							Significantly different (P < 0.05)?	No
							Data analyzed
							Sample size, column A	13
							Sample size, column B	13

## Sheet: Figure 3S1C
NMJ area			Descriptive statistics				T test
White	CacC-GFP			White	CacC-GFP
130.437	220.504		Number of values	14	13		Table Analyzed	HRP area
284.822	230.726
212.485	176.119		Minimum	130.4	161.3		Column B	CacC-GFP
195.744	186.433		25% Percentile	161.5	169.3		vs.	vs.
161.848	230.515		Median	208.2	183.2		Column A	White
160.593	161.278		75% Percentile	251.2	215
172.756	175.433		Maximum	284.8	230.7		Unpaired t test
158.485	163.5		Range	154.4	69.45		P value	0.2331
272.659	183.185						P value summary	ns
255.104	165.741		Mean	207.1	189.2		Significantly different (P < 0.05)?	No
249.933	209.407		Std. Deviation	46.92	25.02		One- or two-tailed P value?	Two-tailed
218.963	172.848		Std. Error of Mean	12.54	6.94		t, df	t=1.222, df=25
221.13	183.526
203.915							How big is the difference?
							Mean of column A	207.1
							Mean of column B	189.2
							Difference between means (B - A) ± SEM	-17.89 ± 14.64
							95% confidence interval	-48.05 to 12.26
							R squared (eta squared)	0.05636
							F test to compare variances
							F, DFn, Dfd	3.515, 13, 12
							P value	0.0368
							P value summary	*
							Significantly different (P < 0.05)?	Yes
							Data analyzed
							Sample size, column A	14
							Sample size, column B	13
