# Supplementary material for: Regulation of presynaptic Ca2+ channel abundance at active zones through a balance of delivery and turnover
Source: eLife. 2022 Jul 14;11:e78648. doi: 10.7554/eLife.78648 (PMC9352347; doi:10.7554/eLife.78648)
Supplement: Figure 3—figure supplement 2—source data 1. [file elife-78648-fig3-figsupp2-data1.xlsx]

## Sheet: Figure 3S2B
Single AZ Cac-GFP (Max AZ pixel intensity)				DESCRIPTIVE STATISTICS				T TEST
CacGFP	CacGFP/+				CacGFP	CacGFP/+
20669	9887.93			Number of values	3452	3976		Table Analyzed	Quant_Control_AZs_Cac_MAX
13487	9352.93
17603	2161.93			Minimum	-546.2	-630.3		Column B	CacGFP/+
12041	11809.9			25% Percentile	11446	5438		vs.	vs.
19079	4998.93			Median	18482	8925		Column A	CacGFP
26922	12750.9			75% Percentile	28290	13919
12162	1223.93			Maximum	60486	50966		Unpaired t test
24098	2312.93			Range	61032	51596		P value	<0.0001
11263	3311.93							P value summary	****
16984	23272.9			Mean	21181	10505		Significantly different (P < 0.05)?	Yes
14390	18580.9			Std. Deviation	12826	7032		One- or two-tailed P value?	Two-tailed
6479	2089.93			Std. Error of Mean	218.3	111.5		t, df	t=45.24, df=7426
11180	3418.93
10770	19499.9							How big is the difference?
9514	20506.9							Mean of column A	21181
9761	10527.9							Mean of column B	10505
13570	7143.93							Difference between means (B - A) ± SEM	-10676 ± 236.0
13446	11739.9							95% confidence interval	-11139 to -10214
5864	5784.93							R squared (eta squared)	0.216
31688	12663.9
4364	11593.9
20379	3182.93
14019	6335.93
10890	17875.9
16532	17617.9
14623	7510.93
10399	16774.9
7197	11808.9
9966	2157.93
14899	4301.93
16950	6491.93
11888	9219.93
17984	2210.93
4467	1190.93
12465	6157.93
20921	16030.9
19181	2945.93
18386	5033.93
10778	4827.93
14552	5735.93
1898	28373.9
18022	412.93
5470	12479.9
14735	6787.93
15039	3295.93
8440	3711.93
6391	8490.93
12889	12161.9
479	10270.9
3964	138.93
8173	6101.93
13475	6278.93
17574	11601.9
13518	12685.9
3623	19428.9
10770	10745.9
7669	3483.93
2165	16599.9
12741	6123.93
7267	8873.93
6416	4620.93
23806	3921.93
14951	12408.9
12849	1882.93
5744	5338.93
9990	12013.9
4809	7427.93
3625	20844.9
8053	15367.9
2436	1288.93
5948	11410.9
7381	9825.93
6551	11355.9
5889	13000.9
10002	6187.93
7276	16296.9
2523	8986.93
10999	19913.9
13199	13598.9
7375	12374.9
13284	32485.9
12495	5224.93
18997	44654.9
51600	20252.9
7431	17773.9
4960	22221.9
19945	6254.93
15838	38306.9
26819	7671.93
8797	22917.9
16843	26487.9
20291	4982.93
35190	7199.93
9230	27206.9
11734	11670.9
6049	13150.9
9619	42023.9
19347	6909.93
20868	4326.93
28167	8828.93
11242	5284.93
15664	10899.9
5059	11789.9
15122	24445.9
13701	17585.9
5822	14188.9
14931	10126.9
10984	9255.93
6603	6639.93
17250	10751.9
5570	13264.9
16388	24877.9
17912	17157.9
20937	26857.9
15094	12537.9
18708	11889.9
14373	7050.93
42959	10116.9
13198	9347.93
13268	11581.9
25906	6785.93
17807	5846.93
29658	8820.93
18679	11374.9
10506	22063.9
9832	15406.9
13871	4437.93
5584	6420.93
19330	15258.9
5166	18006.9
16958	22373.9
6500	22852.9
19562	18848.9
6955	5386.93
8015	6812.93
16558	7005.93
19430	3691.93
12116	6171.93
16885	18676.9
24274	25162.9
9725	13047.9
26022	5833.93
6722	19424.9
29934	6822.93
14195	13983.9
3548	21025.9
7366	34691.9
11354	30690.9
17448	9889.93
39617	23735.9
21713	5316.93
16923	10140.9
4657	12778.9
14690	9816.93
8707	19514.9
13395	20146.9
20681	3728.93
23958	31004.9
-385	3520.93
18778	10866.9
7749	23102.9
13333	17009.9
20300	8583.93
11014	9054.93
15906	9224.93
26363	6040.93
20245	10079.9
12455	16241.9
29086	9041.93
54650	5931.93
33970	12488.9
44695	5174.93
18089	6903.93
30154	9304.93
24983	20841.9
18495	6114.93
26816	5886.93
34741	10148.9
35197	5820.93
8046	13225.9
2025	27709.9
13573	8604.93
37227	7293.93
28971	13562.9
19246	8145.93
20875	8777.93
14029	5784.93
33797	2838.93
47202	16157.9
19290	14977.9
44444	4111.93
29879	10174.9
43920	6160.93
18024	10183.9
24396	16488.9
12852	10683.9
12664	11963.9
14424	10678.9
17236	16855.9
10152	14874.9
3384	16784.9
11801	8831.93
8515	28674.8
20834	21118.8
26677	25495.8
7407	13721.8
38293	23581.8
26942	7573.8
34122	9259.8
8560	9034.8
20605	19241.8
16225	26630.8
9364	4591.8
25848	15963.8
16697	10758.8
9854	12202.8
15098	20800.8
19915	6760.8
12707	25988.8
10697	8556.8
16657	22790.8
18907	9532.8
36422	8831.8
21209	9567.8
10661	15780.8
6720	27569.8
19126	7258.8
25184	10000.8
14947	18897.8
15679	12463.8
28669	3765.8
14637	7616.8
14325	2615.8
16667	9015.8
11149	15563.8
8360	5652.8
13411	4989.8
38673	10721.8
16935	14944.8
10369.1	9074.8
5673.13	2440.8
9703.13	13480.8
5279.13	7353.8
6584.13	3891.8
11127.1	4025.8
13897.1	2585.8
20417.1	6279.8
1979.13	6536.8
7627.13	7484.8
11412.1	10239.8
11146.1	16722.8
1128.13	14632.8
30321.1	13804.8
8076.13	3143.8
4511.13	12376.8
7832.13	17967.8
10766.1	29455.8
6016.13	5278.8
8627.13	14863.8
9761.13	9579.8
4861.13	2665.8
21927.1	7482.8
19546.1	16680.8
7742.13	2969.8
6180.13	21303.8
14344.1	19368.8
15294.1	15736.8
9644.13	7531.8
19419.1	3141.8
9856.13	9381.8
3504.13	4286.8
10988.1	1725.8
3239.13	10472.8
5043.13	12098.8
5735.13	7366.8
14664.1	10136.8
15785.1	16840.8
4954.13	5706.8
26977.1	7739.8
21027.1	12029.8
16807.1	12147.8
15039.1	22401.8
17477.1	8704.8
11436.1	6589.8
10356.1	14312.8
23391.1	8540.8
13375.1	21577.8
22829.1	12506.8
3429.13	4172.8
3165.13	5907.8
9020.13	7484.8
8211.13	1054.8
21432.1	15739.8
21909.1	19645.8
17301.1	9289.8
6320.13	12701.8
7779.13	1895.8
12236.1	14348.8
14875.1	7247.8
10262.1	21486.8
4501.13	7383.8
5566.13	13392.8
11421.1	5197.8
18470.1	9203.8
23903.1	7078.8
24657.1	15247.8
10411.1	13376.8
10475.1	15803.8
6041.13	4345.8
5501.13	7335.8
19674.1	33.8
15557.1	4749.8
21795.1	9948.8
8797.13	2211.8
12510.1	4999.8
10802.1	23923.8
15318.1	4940.8
12666.1	5602.8
13550.1	11191.8
19168.1	-341.2
12608.1	14033.8
30354.1	10382.8
6269.13	6446.8
8629.13	16116.8
35655.1	9981.8
22934.1	5573.8
17439.1	3789.8
24337.1	3489.8
17109.1	10035.8
8506.13	5117.8
25758.1	5632.8
32705.1	4212.8
5476.13	5926.8
26123.1	29797.8
5450.13	21220.8
17194.1	20739.8
6862.13	20302.8
7726.13	22061.8
17027.1	387.8
14134.1	9465.8
14855.1	25989.8
16613.1	1806.8
9738.13	3059.8
26548.1	17060.8
15253.1	6231.8
6429.13	5865.8
16331.1	11497.8
11455.1	21460.8
7418.13	13418.8
43537.1	14833.8
19796.1	16734.8
4776.13	3882.8
5799.13	12417.8
6419.13	3998.8
20992.1	17496.8
14663.1	15975.8
16056.1	4242.8
14518.1	3846.8
16556.1	12164.8
17196.1	4482.8
20240.1	20017.8
11042.1	9160.8
11460.1	9156.8
11008.1	5630.8
19501.1	14945.8
7757.13	9911.8
9988.13	6343.8
5786.13	4375.8
6443.13	9012.8
12558.1	12364.8
6536.13	17623.8
11315.1	12079.8
9936.13	7628.8
20436.1	7363.8
14841.1	9996.8
17731.1	7524.8
11138.1	11191.8
15121.1	13245.8
12672.1	10992.8
6545.13	5376.8
22909.1	14080.8
7642.13	3087.8
21209.1	4163.8
12718.1	3176.8
11477.1	12888.8
9598.13	13728.8
5344.13	15757.8
30938.1	10364.8
31128.1	12865.8
36134.1	11234.8
15689.1	6121.8
26097.1	5068.8
9563.13	6521.8
1839.13	14395.8
7735.13	18591.8
11740.1	23103.8
24566.1	29753.8
16614.1	4311.8
16840.1	13684.8
7996.13	8690.8
11313.1	9055.8
8605.13	6723.8
2599.13	17845.8
7446.13	27305.8
34609.1	24142.8
25642.1	11801.8
23260.1	3461.8
6954.13	6181.8
8791.13	5714.8
11733.1	20739.8
21689.1	4592.8
12587.1	16956.8
27609.1	22747.8
17075.1	12009.8
32459.1	14913.8
6855.13	24019.8
15121.1	8082.8
23057.1	8593.8
9964.13	9558.8
30335.1	14062.8
12630.1	19351.8
16147.1	8693.8
4492.13	6044.8
15901.1	10228.8
10147.1	5383.8
24078.1	7768.8
30847.1	4169.8
5394.13	9444.8
10467.1	5495.8
8484.13	5035.8
7269.13	8861.8
23694.1	4271.8
18032.1	15461.8
4289.13	17704.8
13586.1	10507.8
33301.1	10088.8
31998.1	3363.8
2724.13	5561.8
4283.13	11946.8
19167.1	5647.8
12536.1	3996.8
24666.1	11045.8
11479.1	4697.8
27526.1	8639.8
18601.1	3118.8
11905.1	7260.8
2143.13	3193.8
38374.1	4979.8
7185.59	23605.8
15513.6	32661.8
5141.59	8632.8
19835.6	8303.8
14858.6	10487.8
12665.6	12654.8
9675.59	10187.8
9435.59	3731.8
15352.6	10698.8
25038.6	11333.8
13286.6	5631.8
6273.59	2683.8
15979.6	14080.8
8248.59	15284.8
19235.6	2353.8
27050.6	9812.8
20627.6	14811.8
12848.6	1806.8
33096.6	12525.8
18146.6	2316.8
25301.6	24107.8
12901.6	23954.8
19002.6	7149.8
11722.6	12420.8
23994.6	11515.8
11985.6	6815.8
27674.6	24823.8
14333.6	9724.8
24496.6	8574.8
32973.6	3443.8
14007.6	16400.8
3930.59	12441.8
10508.6	23394.8
13751.6	4250.8
23653.6	31780.8
25376.6	7033.8
28513.6	26529.8
10219.6	9031.8
19915.6	9889.8
5542.59	3081.8
18096.6	1062.8
21003.6	2790.8
8379.59	9982.8
3343.59	5983.8
4791.59	15816.8
5389.59	9003.8
19758.6	20896.8
1124.59	10606.8
3955.59	6103.8
12635.6	3765.8
35743.6	6683.8
1090.59	13983.8
22311.6	14443.8
34223.6	9556.8
6078.59	15797.8
8047.59	12920.8
12401.6	8285.8
14437.6	11430.8
12279.6	6791.8
10058.6	15821.8
3385.59	13869.8
33912.6	7764.8
18980.6	12603.8
34980.6	8248.8
5644.59	25632.8
11586.6	17741.8
13669.6	14361.8
15862.6	12488.8
32124.6	5372.8
6076.59	12615.8
3604.59	6938.8
8819.59	7074.8
7451.59	9552.8
4841.59	6419.8
6885.59	5510.8
15529.6	11238.8
16619.6	2978.8
13047.6	7710.8
29066.6	6722.8
12409.6	15079.8
17322.6	9347.8
16650.6	9492.8
6715.59	4812.8
19051.6	5657.8
13210.6	7916.8
16101.6	5801.8
12254.6	5917.8
12600.6	7664.8
8623.59	5735.8
2115.59	11940.8
18217.6	15878.8
6411.59	15492.8
17649.6	8139.8
2104.59	11447.8
8338.59	7159.68
7447.59	7737.68
16548.6	1445.68
6438.59	10389.7
8468.59	9116.68
15541.6	1805.68
5095.59	10438.7
8084.59	10772.7
13452.6	12484.7
9494.59	16521.7
28168.6	9134.68
9364.59	3573.68
34338.6	6215.68
16648.6	17719.7
13971.6	14282.7
13410.6	4507.68
11446.6	8631.68
8049.59	10728.7
20962.6	23160.7
4383.59	11329.7
4985.59	12318.7
16061.6	5867.68
27598.6	12483.7
812.59	7511.68
22125.6	13938.7
2580.59	4315.68
27050.6	11443.7
23285.6	9615.68
12413.6	19791.7
29045.6	17450.7
28222.6	1695.68
25327.6	12605.7
14807.6	15010.7
21608.6	5475.68
11373.6	3887.68
43593.6	8922.68
15731.6	3955.68
15424.6	11830.7
32557.6	10128.7
26400.6	10038.7
18278.6	7590.68
16050.6	11406.7
7093.59	14083.7
27827.6	11792.7
13500.6	10915.7
21359.6	10364.7
1405.59	1941.68
19228.6	5628.68
18180.6	7101.68
16323.6	31363.7
1566.59	21914.7
7846.59	10116.7
26141.6	31817.7
23668.6	8823.68
20675.6	6417.68
11107.6	5355.68
28763.6	18316.7
9264.59	10506.7
11573.6	14874.7
11044.6	10926.7
24109.6	11423.7
39629.6	12090.7
15376.6	23236.7
37737.6	4240.68
53177.6	20689.7
8776.59	1228.68
24407.6	17863.7
25636.6	13451.7
29382.6	7009.68
18413.6	4973.68
14638.6	12679.7
10824.6	3244.68
13341.6	5528.68
13451.6	26215.7
20074.6	11057.7
36409.6	10822.7
14340.6	9156.68
27410.6	3774.68
17607.6	11707.7
42978.6	24838.7
10709.6	14104.7
26759.6	8431.68
6512.59	2511.68
7683.59	7401.68
13852.6	17095.7
18989.6	18954.7
14651.6	4632.68
13210.6	1567.68
11062.6	5740.68
19828.6	9219.68
5517.59	8605.68
16004.6	10791.7
37323.6	14189.7
25509.6	5103.68
12679.6	7092.68
23732.6	22318.7
13656.6	21886.7
22649.6	4371.68
40233.6	9154.68
8779.59	9306.68
28665.6	12982.7
25387.6	5466.68
17854.6	12089.7
11849.6	6317.68
22264.6	6506.68
5542.59	2259.68
27969.6	18848.7
25058.6	19922.7
23600.6	590.68
6411.59	11647.7
14146.6	2902.68
11089.6	1948.68
19334.6	5521.68
14513.6	15226.7
15426.6	6822.68
27038.6	2940.68
31081.6	9118.68
15744.6	3479.68
12003.6	6113.68
31243.6	4544.68
19712.6	3890.68
29349.6	2114.68
11266.6	3587.68
28781.6	4306.68
33819.6	2953.68
25138.6	6665.68
25033.6	4444.68
11612.6	4279.68
21014.6	11696.7
42048.6	4562.68
5647.59	5224.68
30176.6	3757.68
12077.9	2922.68
11430.9	2898.68
14957.9	15099.7
5431.88	4415.68
7192.88	3305.68
27635.9	6393.68
34396.9	12086.7
43359.9	1575.68
50947.9	2549.68
2506.88	4909.68
3134.88	1626.68
19149.9	3453.68
9748.88	5385.68
19774.9	3356.68
25722.9	-630.32
28103.9	1881.68
34695.9	3615.68
2070.88	4599.68
56366.9	2469.68
31152.9	3080.68
37801.9	3471.68
14750.9	1009.68
22815.9	3493.68
25364.9	1970.68
23126.9	3868.68
10177.9	4420.68
11968.9	9803.68
36675.9	8580.68
12465.9	4890.68
16501.9	7021.68
8016.88	6240.68
20159.9	8211.68
56651.9	6562.68
36106.9	1375.68
21356.9	9967.68
59314.9	9015.68
52696.9	9453.68
6777.88	11732.7
40257.9	7668.68
13827.9	6160.68
46493.9	6113.68
6189.88	3966.68
16514.9	9351.68
57677.9	7255.68
12708.9	1438.68
59314.9	426.68
11265.9	4386.68
39549.9	6184.68
21544.9	6412.68
36212.9	6159.68
59314.9	9674.68
12302.9	3663.68
15001.9	9401.68
25629.9	2685.68
24346.9	10051.7
21136.9	10356.7
8989.88	20381.7
28881.9	8466.68
55671.9	10663.7
55446.9	3834.68
35629.9	6712.68
37129.9	2611.68
49804.9	21946.7
24898.9	5284.68
54591.9	2346.68
41567.9	17226.7
14166.9	14276.7
16800.9	9859.68
40785.9	14075.7
18255.9	4118.68
14509.9	10806.7
29608.9	8036.68
39068.9	7028.68
13848.9	7863.68
42774.9	21361.7
22272.9	1449.68
59314.9	7081.68
13575.9	4245.68
30417.9	3888.68
12356.9	3953.68
59314.9	7252.68
29753.9	4654.68
22716.9	5995.68
59314.9	5987.68
58981.9	3042.68
23059.9	10477.7
30544.9	12139.7
59314.9	4221.68
30800.9	8412.68
20733.9	32730.7
23896.9	5790.68
19431.9	4623.68
7168.88	15540.7
28483.9	19455.7
34734.9	977.68
59314.9	8352.68
21579.9	6900.68
49676.9	2634.68
35082.9	11575.7
29289.9	2719.68
50923.9	4207.68
59314.9	15889.7
43019.9	8387.68
53029.9	18324.7
18395.9	2336.68
32774.9	10640.7
32484.9	5961.68
57724.9	2833.68
34386.9	6429.68
58693.9	22961.7
37700.9	8205.68
24175.9	17750.7
37867.9	24144.7
51386.9	7862.68
863.88	11368.7
37926.9	7420.68
22074.9	22436.7
8784.88	24295.7
19943.9	11880.7
59314.9	16348.7
53695.9	9471.68
59314.9	7311.68
20132.9	17649.7
24310.9	8009.68
50922.9	6027.68
47476.9	10591.7
26404.9	11718.7
56551.9	23061.7
52527.9	7804.68
21398.7	16343.7
60335.7	16241.7
41321.7	9424.68
60362.7	28491.7
58720.7	12960.7
35450.7	14742.7
34178.7	8936.68
27922.7	16781.7
10281.7	16209.7
5576.71	7060.68
43480.7	3488.68
32622.7	18718.7
37749.7	8161.68
18196.7	7807.68
32299.7	4529.68
19498.7	8228.68
26125.7	6654.68
5293.71	6618.68
35189.7	3697.68
59914.7	8698.68
49997.7	8204.68
30852.7	10569.7
60362.7	6494.68
44597.7	14088.7
55864.7	8518.68
38640.7	8217.68
14894.7	11401.7
29890.7	5381.68
1807.71	4626.68
14816.7	5079.68
33976.7	18758.7
19259.7	8911.68
54181.7	10635.7
23450.7	12166.7
31438.7	12301.7
10647.7	8918.68
4741.71	10082.7
8975.71	16636.7
27125.7	9590.68
60362.7	15489.7
42218.7	5881.68
39513.7	5109.68
9271.71	5839.68
60362.7	9324.68
26349.7	3905.68
12354.7	11457.7
34304.7	9578.68
31148.7	6474.68
60362.7	9997.68
12404.7	4385.68
28691.7	9635.68
54755.7	29418.7
23749.7	11311.7
60362.7	16978.7
14301.7	5670.68
30009.7	10473.7
54036.7	20700.7
17220.7	11864.7
41721.7	8205.68
25383.7	5661.68
41457.7	8259.68
27030.7	11149.7
39324.7	9090.68
26676.7	19758.7
5444.71	12562.7
39933.7	10881.7
27212.7	14084.7
31326.7	11189.7
7720.71	7618.68
37195.7	6845.68
10031.7	5129.68
30730.7	8719.68
23514.7	6804.68
52099.7	6296.68
33503.7	14880.7
24071.7	17933.6
18873.7	21458.6
16185.7	3655.62
19658.7	8423.62
26318.7	11732.6
34321.7	4653.62
24302.7	6748.62
29762.7	6861.62
16240.7	7595.62
32770.7	4604.62
8850.71	4697.62
16508.7	4718.62
21593.7	13048.6
50960.7	7382.62
24068.7	5653.62
33622.7	5550.62
15100.7	3640.62
29473.7	8003.62
19272.7	12078.6
16496.7	5318.62
46844.7	15504.6
10434.7	1162.62
10246.7	12187.6
27835.7	13310.6
28648.7	6006.62
28929.7	3858.62
37508.7	4046.62
11741.7	3805.62
29758.7	2460.62
17368.7	2953.62
16314.7	16767.6
21781.7	11190.6
29223.7	4443.62
30147.7	10500.6
3827.71	11700.6
33695.7	9185.62
35100.7	9607.62
34464.7	3243.62
37911.7	12142.6
22770.7	7349.62
10807.7	3860.62
3253.71	8521.62
26035.7	2472.62
16701.7	11250.6
21821.7	13850.6
9048.71	11122.6
32168.7	2328.62
1970.71	3306.62
5709.71	9162.62
9613.71	11413.6
10472.7	1135.62
15382.7	3932.62
5686.71	3872.62
5914.71	11803.6
8327.71	1036.62
2783.71	6516.62
5242.71	1656.62
3711.71	7905.62
10986.7	5509.62
11864.7	1632.62
12350.7	10310.6
7436.71	10890.6
12931.7	6948.62
7672.71	5750.62
8703.71	3586.62
5074.71	2779.62
10691.7	7493.62
4533.71	5417.62
15422.7	12328.6
4594.71	7202.62
5084.71	5248.62
15542.7	8512.62
8891.71	4403.62
7315.71	3332.62
9150.71	3114.62
11066.7	9493.62
12383.7	4240.62
7001.71	18420.6
7943.71	10082.6
5823.71	10118.6
7520.71	12710.6
35301.7	19036.6
31321.7	17188.6
5979.71	10586.6
48156.7	6745.62
33727.7	13887.6
20294.7	12664.6
10940.7	8375.62
6676.71	11299.6
7446.71	7072.62
8611.71	10954.6
5836.71	6829.62
5377.71	8687.62
18625.7	16933.6
20550.7	5501.62
15105.7	12839.6
6711.71	24547.6
5522.71	2248.62
8189.71	3706.62
13374.7	11924.6
12286.7	6731.62
3813.71	18537.6
11318.7	4890.62
4229.71	7493.62
35112.7	6462.62
20333.7	6784.62
14857.7	6028.62
13744.7	5810.62
6758.71	8534.62
8377.71	4382.62
25310.7	11710.6
9061.71	8268.62
3897.71	2708.62
22308.7	7703.62
49406.7	10495.6
21640.7	2528.62
36120.7	14916.6
33844.7	7105.62
19382.7	7098.62
19112.7	10239.6
2317.71	5801.62
7474.71	6050.62
32723.7	3689.62
11578.7	13516.6
3458.71	4045.62
3714.71	6206.62
5382.71	4409.62
22593.7	5239.62
11603.7	22832.6
7446.71	3656.62
16445.7	14496.6
24538.7	1584.62
27148.7	10214.6
24203.7	3780.62
6829.71	8208.62
18470.7	3967.62
29068.7	4369.62
11410.7	9483.62
8865.71	9862.62
4184.71	4167.62
5011.71	985.62
14684.7	10434.6
9731.71	2714.62
8633.71	2624.62
10462.7	405.62
5489.71	11894.6
10892.7	11896.6
7960.71	4685.62
16624.7	12009.6
20046.7	9505.62
3646.71	4552.62
27348.7	16568.6
12586.7	810.62
18071.7	5265.62
8882.71	10195.6
13766.7	6058.62
18312.7	15226.6
8409.71	3049.62
18846.7	7908.62
13599.7	3842.62
10373.7	6613.62
33137.7	2708.62
14871.7	3147.62
5499.71	3777.62
43394.7	7917.62
12933.7	7487.62
31552.7	3329.62
27177.7	1582.62
17131.7	448.62
4864.71	343.62
18805.7	13850.6
19183.7	5169.62
12100.7	12633.6
9508.71	5013.62
13791.7	13976.6
5085.71	3888.62
23983.7	5828.62
18497.7	1940.62
17955.7	11025.6
9716.71	2116.62
14647.7	9382.62
22408.7	10978.6
27150.7	6281.62
10639.7	13478.6
28716.7	9976.62
3510.71	660.62
6863.71	4692.62
28354.7	4255.62
11418.7	2731.62
37863.7	3289.62
23143.7	4106.62
22484.7	11415.6
56725.7	2223.62
16979.7	7673.62
35084.7	6512.62
12499.7	12451.6
8118.71	4382.62
10150.7	11901.6
44848.7	10684.6
12890.7	4673.62
5482.71	8654.62
9290.71	3784.62
8026.71	10002.6
12500.7	3216.62
34720.7	5677.62
27662.7	4316.62
10642.7	7860.62
13625.7	4483.62
13742.7	8796.62
9762.71	6229.62
38090.7	7123.62
11045.7	11074.6
3612.71	6021.62
5863.71	5090.62
8035.71	2894.62
27356.7	10632.6
33116.7	15952.6
6301.71	6644.62
7958.71	4004.62
15499.7	3388.62
15787.7	9694.62
12289.7	6396.62
18392.7	11042.6
40354.7	1825.62
18658.7	7635.62
7209.71	4990.62
43410.7	13523.6
6995.71	17212.6
21287.7	17791.6
12103.7	7926.62
27576.7	10363.6
24823.7	23242.6
12070.7	12969.6
52572.7	15969.6
59147.7	6892.62
31213.7	15948.6
45942.7	14852.6
32987.7	8862.62
13600.7	7922.62
17367.7	8496.62
30838.4	18714.6
9411.38	7139.62
29450.4	4161.62
22885.4	2100.62
38016.4	1077.62
31657.4	4444.62
6364.38	9890.62
52506.4	6103.62
35950.4	8810.62
15369.4	6364.62
13375.4	6686.62
23665.4	3797.62
33425.4	14198.6
27155.4	8806.62
24834.4	13507.6
22355.4	8032.62
13931.4	11379.6
21609.4	12873.6
28328.4	2931.62
15001.4	6446.62
14136.4	5087.62
35933.4	10544.6
33721.4	5704.62
19569.4	5966.62
33048.4	5921.62
27214.4	7655.62
26508.4	3817.62
45303.4	11779.6
37303.4	8808.62
45734.4	4047.62
29211.4	22447.6
29593.4	13618.6
24300.4	4576.62
32105.4	4630.62
33242.4	14777.6
29043.4	4405.62
27401.4	9087.62
9817.38	4146.62
26115.4	21360.6
57512.4	5645.62
19605.4	22524.6
15148.4	2919.62
17100.4	34410.6
19440.4	11546.6
23201.4	27284.6
35697.4	28801.6
12427.4	14424.6
31936.4	6221.62
32838.4	16774.6
12533.4	3432.62
55830.4	8024.62
23176.4	6486.62
35713.4	3572.62
35206.4	6349.62
20962.4	6170.62
6801.38	5837.62
28947.4	4169.62
24343.4	6292.62
11464.4	11851.6
27829.4	8753.62
29220.4	12467.6
53410.4	5879.62
37506.4	3126.62
26320.4	13838.6
19838.4	5071.62
10780.4	8623.62
42737.4	3138.62
10280.4	14155.6
19766.4	10089.6
24546.4	6502.62
26049.4	12704.6
28302.4	3993.62
7649.38	12981.6
36008.4	5489.62
28502.4	4916.62
26429.4	14467.6
16954.4	5869.62
17022.4	6947.62
4574.38	20804.6
39448.4	11391.6
32170.4	8141.62
24290.4	9135.62
15954.4	10634.6
35457.4	5696.62
8569.38	6273.62
46496.4	3322.62
34256.4	4480.62
59593.4	12675.6
12566.4	15561.6
35517.4	9467.62
14686.4	5545.62
30051.4	5277.62
8515.38	7344.62
32613.4	8816.62
34054.4	6653.62
37007.4	4193.62
28861.4	4987.62
32591.4	4722.62
45197.4	2922.62
8670.38	4532.62
39933.4	6685.62
7685.38	2917.62
27290.4	8313.62
17756.4	4366.62
26590.4	8328.62
53627.4	8562.62
36579.4	4351.62
50940.4	6539.62
7103.38	4859.62
7956.38	3094.62
10548.4	6611.62
10163.4	5641.62
7270.38	4213.62
21096.4	5430.62
31162.4	8325.62
28628.4	5313.62
13609.4	7532.62
24362.4	4714.62
18379.4	4270.62
22704.4	4788.62
8157.38	7942.62
30916.4	4053.53
11894.4	2538.53
25693.4	5489.53
17479.4	4342.53
22966.4	3722.53
7646.38	10373.5
12931.4	352.53
32940.4	1947.53
8789.38	5762.53
38863.4	123.53
9393.38	5774.53
18175.4	4213.53
19086.4	-344.47
52389.4	11170.5
31209.4	7204.53
48605.4	934.53
22927.4	756.53
13811.4	2890.53
7903.38	4122.53
23579.4	1532.53
11994.4	3452.53
24718.4	5844.53
23040.4	3802.53
28728.4	4269.53
20492.4	13362.5
17554.4	5915.53
31159.4	3228.53
11053.4	9932.53
33971.4	4647.53
24616.4	10114.5
19870.4	498.53
20207.4	1704.53
9174.38	8539.53
16658.4	11576.5
10987.4	1533.53
34373.4	4833.53
19685.4	8005.53
26991.4	20074.5
12460.4	10753.5
26782.4	6332.53
18703.4	3726.53
30567.4	6124.53
10167.4	15224.5
39293.4	4597.53
27787.4	2216.53
18159.4	12501.5
10235.4	10503.5
26686.4	7484.53
16571.4	6453.53
28076.4	7708.53
20775.4	3953.53
12036.4	6257.53
17416.4	7829.53
19075.4	15254.5
12402.4	1741.53
13576.4	7617.53
10933.4	8688.53
26390.4	6861.53
17871.4	13222.5
3937.38	11874.5
18758.4	6597.53
31801.4	7729.53
19233.4	9341.53
14996.4	12226.5
10948.4	5002.53
8408.38	3129.53
7010.38	4099.53
19964.4	12303.5
13720.4	20246.5
18297.4	5342.53
8847.38	9298.53
6983.38	20287.5
28634.4	5770.53
15866.4	6824.53
32253.4	8916.53
23581.4	1114.53
3696.38	4697.53
12166.4	2258.53
11808.4	995.53
3839.38	3898.53
32507.4	8109.53
16043.4	2069.53
7071.38	1367.53
21129.4	10932.5
46480.4	11614.5
22465.4	8671.53
28412.4	2522.53
7898.38	3527.53
12383.4	3863.53
59593.4	595.53
55747.4	470.53
31642.4	7379.53
19077.4	758.53
59593.4	578.53
9640.38	1206.53
50147.4	4476.53
59457.4	2898.53
27560.4	-532.47
40406.4	1937.53
26570.4	7190.53
5196.38	3022.53
27080.4	1057.53
24411.4	1205.53
17463.4	4521.53
37712.4	285.53
14805.4	2559.53
6241.38	4614.53
38072.4	10412.5
20101.4	3821.53
47404.4	5622.53
2548.38	3840.53
4384.38	75.53
16295.4	6818.53
27146.4	1187.53
21235.4	6054.53
44201.4	2865.53
45585.4	37.53
36811.4	4196.53
7570.38	1155.53
17541.4	11487.5
37089.4	7702.53
6614.38	4624.53
31953.4	4501.53
11021.4	10877.5
53473.4	7044.53
43159.4	6823.53
16269.4	8097.53
13122.4	4583.53
23665.4	8132.53
26805.4	8281.53
40335.4	11484.5
11842.4	11302.5
33880.4	144.53
42647.4	2780.53
28202.4	4819.53
25671.4	14092.5
33338.4	2221.53
4236.38	5132.53
18348.4	809.53
13504.4	7747.53
38560.4	4135.53
18334.4	1264.53
26681.4	5142.53
22101.4	2932.53
14799.4	11651.5
23280.4	14042.5
20435.4	2978.53
19051.4	6076.53
37833.4	6653.53
29791.4	3439.53
8857.38	5772.53
41099.4	9890.53
29021.4	5025.53
58857.4	5340.53
15144.4	4652.53
12645.4	9889.53
19527.4	5160.53
19795.4	5862.53
12159.4	5023.53
23484.4	2718.53
13518.4	3386.53
16451.4	2203.53
10329.4	7168.53
13334.4	8090.53
26860.4	3627.53
18777.4	7590.53
22227.4	10340.5
17442.4	6069.53
15298.4	5963.53
8838.38	4479.53
19526.4	7940.53
16475.4	3609.53
19555.4	7011.53
34221.4	14306.5
23671.4	1690.53
18096.4	13965.5
27376.4	5877.53
41739.4	12295.5
38874.4	6376.53
54433.4	8880.53
14170.4	13004.5
24426.4	7716.53
39180.4	7516.53
37095.4	5205.53
9883.38	4770.53
32061.4	8695.53
16273.4	10595.5
30928.4	1564.53
18725.4	17989.5
37391.4	2310.53
19135.4	11411.5
17581.4	9213.53
24708.4	6645.53
25474.4	16826.5
33600.4	7999.53
9429.38	21468.5
17811.4	14976.5
13383.4	7142.53
19727.4	2173.53
13535.4	3386.53
16859.4	10073.5
5065.38	6597.53
14928.4	5103.53
23253.4	10268.5
40355.4	8448.53
9115.38	5504.53
30754.4	6289.53
7383.38	12451.5
10126.4	17697.5
17717.4	5030.53
14272.4	7382.53
23251.4	6575.53
36042.4	3225.53
12556.4	9544.53
15725.4	12294.5
19781.4	1760.53
33156.4	4069.53
8079.38	10218.5
28341.4	10813.5
12659.4	4068.53
13321.4	8899.53
12370.4	6527.53
47501.4	4042.53
24936.4	4893.53
8069.38	2268.53
34183.4	13599.5
18787.4	3560.53
9054.38	5189.53
6035.38	18978.5
17300.4	13307.5
7568.38	3328.53
9264.38	5436.53
10501.4	16855.5
12705.4	3874.53
6979.85	15264.5
4631.85	12209.5
14156.9	11639.5
14344.9	5218.53
11384.9	3442.53
6586.85	19602.5
7101.85	20856.3
7949.85	15727.4
11868.9	24772.3
25708.8	8583.35
18750.8	7359.35
13291.9	6967.35
8803.85	8755.35
5360.85	14883.4
6506.85	13640.4
2663.85	18523.3
10062.9	4085.35
6543.85	16111.4
-546.15	15023.4
11502.9	21626.3
1773.85	4730.35
24851.8	5989.35
11634.9	14618.4
10166.9	1677.35
5355.85	14642.4
4294.85	14402.4
13291.9	5245.35
3971.85	1851.35
8021.85	20993.3
12892.9	12958.4
4100.85	8716.35
11834.9	14427.4
12484.9	14130.4
12276.9	24520.3
2.85	13097.4
10569.9	5888.35
2758.85	7602.35
21975.8	6628.35
5907.85	15389.4
5588.85	10614.4
28535.8	7630.35
9624.85	13256.4
4765.85	5835.35
28819.8	24359.3
9056.85	11063.4
12275.9	16130.4
7010.85	12689.4
34846.8	9874.35
17771.8	9392.35
9108.85	4441.35
17542.8	11129.4
20620.8	11898.4
4694.85	10535.4
6170.85	9608.35
11185.9	20045.3
2951.85	5164.35
13634.9	8239.35
16514.8	8870.35
26701.8	9981.35
36393.8	6904.35
14649.9	17868.3
11591.9	15140.4
14151.9	10949.4
8710.85	25686.3
19998.8	7942.35
11379.9	12571.4
18084.8	14546.4
42767.8	22143.3
14394.9	4718.35
11588.9	10206.4
24525.8	17327.3
17455.8	4457.35
24387.8	1923.35
11714.9	14803.4
18459.8	28863.3
10588.9	24588.3
12491.9	24136.3
7703.85	8843.35
12554.9	8204.35
20113.8	13351.4
28559.8	5397.35
35144.8	14652.4
5113.85	4118.35
22129.8	15001.4
9441.85	6584.35
9929.85	10198.4
7310.85	5647.35
32260.8	8701.35
26904.8	8614.35
23506.8	35119.3
15680.9	12264.4
28265.8	9059.35
43928.8	7411.35
7786.85	13188.4
13932.9	10902.4
14158.9	8354.35
19130.8	4849.35
17554.8	16130.4
35864.8	14601.4
27370.8	9171.35
29238.8	7666.35
8624.85	21406.3
13866.9	11961.4
18836.8	19139.3
17294.8	10245.4
24345.8	10249.4
5807.85	12553.4
26341.8	2622.35
7532.85	11828.4
15871.9	17859.3
10868.9	19514.3
36614.8	6880.35
24397.8	10482.4
7692.85	19554.3
33745.8	10933.4
37322.8	11673.4
17684.8	9951.35
21846.8	7558.35
25457.8	21602.3
28829.8	6563.35
8658.85	2859.35
16663.8	6001.35
20242.8	1786.35
43202.8	16129.4
23297.8	568.35
8055.85	9202.35
20756.8	5422.35
12849.9	14484.4
34070.8	5277.35
10261.9	39982.3
7315.85	8075.35
24515.8	10034.4
13194.9	13801.4
29472.8	22382.3
35390.8	19739.3
27076.8	8967.35
27004.8	13041.4
40467.8	13214.4
16946.8	10425.4
18530.8	15876.4
21704.8	13288.4
12859.9	13647.4
35056.8	12386.4
19360.8	4306.35
18629.8	13073.4
23343.8	12127.4
18463.8	18114.3
23192.8	33437.3
11679.9	9930.35
7581.85	24884.3
17070.8	5782.35
18240.8	8073.35
53895.8	8119.35
29497.8	8656.35
34693.8	4816.35
12814.9	9533.35
4889.85	19295.3
24229.8	7917.35
38188.8	5939.35
26159.8	30144.3
8824.85	8253.35
26751.8	13787.4
4668.45	14881.4
5182.45	12038.4
11002.5	4896.35
5939.45	18018.3
5184.45	9311.35
2789.45	6462.35
8191.45	8193.35
11570.5	13852.4
7453.45	9483.35
9004.45	5280.35
5256.45	8312.35
5496.45	19846.3
6291.45	10467.4
13756.5	9474.35
10346.5	5054.35
5363.45	34302.3
5183.45	30565.3
3344.45	6372.35
248.45	12664.4
3051.45	6751.35
14159.5	11870.4
2569.45	2769.35
3815.45	4167.35
6969.45	22662.3
7580.45	3730.35
4055.45	17015.3
5106.45	7531.35
9808.45	10633.4
6558.45	14159.4
3596.45	2915.35
6094.45	7047.35
3564.45	7857.35
4766.45	3147.35
2406.45	8906.35
3605.45	8125.35
8645.45	8444.35
14609.5	10969.4
11114.5	15789.4
5105.45	23617.3
12212.5	23859.3
2802.45	7554.35
9013.45	10916.4
9417.45	4211.35
6111.45	9273.35
12626.5	10104.4
3463.45	6129.35
13800.5	4807.35
11894.5	6415.35
4445.45	22528.3
5336.45	9691.35
10474.5	2997.35
14113.5	6719.35
24032.5	6232.35
5913.45	16079.4
17862.5	13048.4
21612.5	12023.4
2397.45	13948.4
5730.45	4038.35
8748.45	10965.4
17826.5	15153.4
16082.5	12649.4
7363.45	27305.3
9339.45	22657.3
6424.45	7339.35
3983.45	257.35
7497.45	8820.35
19155.5	4846.35
8928.45	8742.35
16271.5	11533.4
13617.5	17080.3
13638.5	14812.4
15888.5	9023.35
15679.5	16181.4
6922.45	2862.35
12938.5	17684.3
13833.5	4832.35
4338.45	5951.35
9328.45	8095.35
10908.5	31555.3
12481.5	3527.35
17218	15101.4
14305	7361.35
25337	12974.4
38324.1	7499.35
11214	7777.35
17398	13826.4
4957.05	14822.4
34593.1	16213.4
33803.1	7597.35
49950.1	6747.35
21280	19675.3
21196	18939.3
45003.1	9067.35
22332	19563.3
6610.05	3995.35
23372	14968.4
36218.1	7906.35
14177	12347.4
26646	8927.35
14319	21780.3
16528	10316.4
7306.05	7778.35
42599.1	11100.4
13666	6369.35
21113	17907.3
7979.05	2625.35
11014	17883.3
34149.1	17334.3
42266.1	3199.35
10828	19108.3
56434.1	14386.4
32022	15093.4
43545.1	2911.35
23911	3710.35
26249	8191.35
27168	6188.35
3564.05	4609.35
33193.1	5683.35
8919.05	14299.4
7335.05	7925.35
6987.05	4703.35
29446	9982.35
37478.1	8979.35
26003	11072.4
26703	4990.35
50938.1	9490.35
13064	5980.35
22272	11794.4
15128	8834.35
35966.1	14689.4
20070	9816.35
40323.1	4433.35
52790.1	7620.35
7727.05	6456.35
13323	10115.4
16543	10387.4
8777.05	7615.35
12403	6295.35
14283	2655.35
9423.05	7984.35
55706.1	2625.35
16476	3804.35
38668.1	2829.35
13225	12789.4
9456.05	12901.5
6710.05	6960.54
28595	13349.5
13361	18125.5
17289	18400.5
14310	5839.54
26725	13075.5
22738	17811.5
22374	11281.5
18605	4737.54
12607	12908.5
58915.1	21109.5
20289	25318.5
13388	18713.5
37380.1	12690.5
11798	23239.5
59544.1	9397.54
6713.05	19351.5
40054.1	40127.5
4019.05	29296.5
13936	35289.5
17629	20940.5
7091.05	3569.54
33020.1	1997.54
7139.05	2070.54
14395	7913.54
23638	11052.5
34822.1	14335.5
8006.05	19399.5
32466	8546.54
21563	10400.5
24464	2534.54
48476.1	13506.5
26890	6831.54
13469	17436.5
7725.05	5107.54
18848	7866.54
13490	2241.54
13492	15478.5
10490	7115.54
3560.05	15313.5
30232	2188.54
30084	17381.5
9474.05	16802.5
30495	8250.54
35419.1	14225.5
35953.1	26900.5
52361.1	1612.54
18029	22885.5
4997.05	10838.5
10186	5293.54
11048	16618.5
20920	6398.54
8084.05	4317.54
23032	5164.54
18514	10171.5
14908	6539.54
11685	17187.5
8041.05	7352.54
44722.1	8173.54
7838.05	9477.54
22731	12403.5
21314	15220.5
33171.1	11516.5
15078	6502.54
28270	12520.5
23976	11803.5
15982	3966.54
10237	25548.5
18979	8216.54
18878	4250.54
11689	11854.5
7810.05	6984.54
29534	16159.5
21914	4569.54
11709	2299.54
27755	18806.5
16974	9538.54
23322	8495.54
20495	9334.54
26833	4802.54
41097.1	18421.5
21178	7410.54
35706.1	3094.54
23228	9564.54
13136	12031.5
6057.05	9193.54
37479.1	5921.54
31617	523.54
45508.1	13221.5
17133	6729.54
27417	8382.54
41699.1	6643.54
18295	2820.54
8404.05	5979.54
19572	15668.5
16695	1097.54
7290.05	15226.5
15021	10205.5
12912	4256.54
22303	7432.54
13447	4117.54
47820.1	4566.54
42752.1	12631.5
10485	22039.5
11505	15302.5
26220	6968.54
35219.1	7819.54
42901.1	6565.54
18019	4251.54
59544.1	7682.54
28822	1750.54
30512	4099.54
59544.1	19430.5
37302.1	24644.5
23384	9896.54
28684	8621.54
11918	2324.54
35567.1	9867.54
17817	9077.54
36539.1	1046.54
45778.1	10853.5
10011	6001.54
16704	6063.54
43248.1	11396.5
23859	13367.5
59544.1	8453.54
39644.1	3534.54
26113	24731.5
36783.1	10853.5
48963.1	9368.54
6896.05	7379.54
17763	13611.5
34756.1	18752.5
36870.1	11913.5
36661.1	24944.5
49621.1	11452.5
8958.05	14380.5
19317	5083.54
9923.05	6910.54
10328	6106.54
12866	8087.54
18582	3956.54
16526	3921.54
11144	5628.54
36261.1	13802.5
46225.1	18450.5
17077	3869.54
38964.1	28422.5
20621	15662.5
14309	3190.54
42602.1	7460.54
37446.1	12922.5
45704.1	12425.5
24236	14429.5
7849.05	12238.5
5919.05	18835.5
21297	3136.54
15513	13629.5
15673	22250.5
27488	17944.5
8603.05	2270.54
5937.05	8472.54
18980	2656.54
27458	6954.54
21039	5778.54
28296	9312.54
20283	2707.54
20538	11196.5
7247.05	12820.5
15558	32265.5
47130.1	6301.54
19341	18960.5
39583.1	11944.5
15450	13138.5
16996	8401.54
22542	8949.54
16161	11473.5
11987	6140.54
29333	4343.54
13919	21075.5
32369	40254.5
17505	6942.54
17445	9599.54
42440	15145.5
9969.04	12860.5
50551	4816.54
29739	3598.54
54925	10169.5
45240	8796.54
35445	8981.54
38494	11489.5
35794	12861.5
31991	6628.54
38905	6243.54
39804	11009.5
39252	6429.54
32769	9289.54
22954	14277.5
19308	10915.5
34045	13182.5
43717	22769.5
13105	19521.5
18701	7547.54
27040	4499.54
23182	7950.54
43948	15034.5
19106	10692.5
24870	8888.54
20399	3670.54
22811	6930.54
6579.04	7630.54
12340	14208.5
7462.04	7563.54
20203	11143.5
24629	14560.5
22874	10339.5
8426.04	15590.5
22290	17532.5
[truncated: 1,978 more rows]

## Sheet: Figure 3S2C
Single AZ Cac-GFP (Sum of AZ ROI)				DESCRIPTIVE STATISTICS				T TEST
CacGFP	CacGFP/+				CacGFP	CacGFP/+		Table Analyzed	Quant_Control_AZs_Cac_SUM
79625.4	42046.1			Number of values	3157	3818
53223.4	50333.2							Column B	CacGFP/+
100947	25325.2			Minimum	-9610	-18348		vs.	vs.
64453.4	70973.1			25% Percentile	57826	24346		Column A	CacGFP
90534.4	29379.1			Median	101531	46654
130732	60289.7			75% Percentile	169572	83322		Unpaired t test
56809.4	3808.37			Maximum	848418	520060		P value	<0.0001
118970	15946.1			Range	858028	538408		P value summary	****
154428	129635							Significantly different (P < 0.05)?	Yes
80697.1	13841.2			Mean	127105	60865		One- or two-tailed P value?	Two-tailed
84783.1	86692.1			Std. Deviation	96682	53085		t, df	t=36.24, df=6973
34198.4	16160.1			Std. Error of Mean	1721	859.1
111558	80914.1							How big is the difference?
36009.4	126414							Mean of column A	127105
130171	60876.1							Mean of column B	60865
37634.9	24581.1							Difference between means (B - A) ± SEM	-66240 ± 1828
219678	48322.1							95% confidence interval	-69823 to -62657
51522.1	33232.1							R squared (eta squared)	0.1585
16523.4	70952.1
101557	54157.1							F test to compare variances
45875.4	13093.1							F, DFn, Dfd	3.317, 3156, 3817
93231.4	31882.1							P value	<0.0001
80255.4	104004							P value summary	****
63606.4	103293							Significantly different (P < 0.05)?	Yes
62131.1	30087.1
92974.1	95863.1							Data analyzed
151581	61598.1							Sample size, column A	3157
24874.9	9290.51							Sample size, column B	3818
86738.1	78280.4
21131.6	2421.51
58774.1	13552.1
57722.4	10167.1
103400	19130.1
208206	11582.2
71658.4	92537.1
5418.38	19552.1
99576.4	16704.1
28988.4	26769.1
69758.4	148738
1.56	4078.09
153745	65166.1
64806.4	23703.1
33497.9	10003.2
53981.4	14780.1
61601.4	35014.1
25041.4	67469.1
69736.4	63909.1
65432.4	-4596.84
13227.9	27378.2
44067.9	25149.1
54199.4	114119
449.38	37994.2
75100.4	102519
67244	23256.2
134174	87069.1
70409.4	54576.2
72104.4	16068.2
23056.4	89578.4
39407.4	-1697.91
17379.4	11955.1
11104.4	49230.1
40169.4	26130.1
4376.38	108640
22972.4	88199.1
111704	3913.09
35082.4	41960.2
24299.4	51969.1
16557.4	55505.1
12994.4	50618.1
47473.4	29846.1
21609.4	57729.1
1664.38	36358.1
47666.4	85518.1
62332.1	54538.1
22019.3	103108
28604.4	207040
72858.4	300932
52607.4	97879.1
15167.4	85087.1
97637.4	118808
297857	71250.5
31128.4	212125
98137.1	108760
28521.4	122602
98101.4	63315.5
152924	182454
43773.1	65280.2
92362.1	259918
121840	62897.1
213170	31520.1
61898.4	18609.1
19389.4	57899.1
296836	25000.1
183491	44434.1
62545.4	56522.1
19577.4	127050
83255.4	87157.1
51837.4	30635.2
33830.1	65326.1
56272.1	61482.1
86312.4	40411.1
37652.4	24510.1
78567.4	58462.1
28048.4	60889.1
89551.4	141624
78580.9	80882.1
113720	187161
92175.4	72145.2
83019.9	24678.2
145102	45707.1
275987	45477.1
82137.4	73262.1
124427	29854.1
109780	27426.1
141970	41244.1
52042.3	48156.1
70390.1	126839
34385.9	90923.1
88781.4	27556.2
57225.4	78084.2
105631	82502.1
12397.4	142828
97471.4	92730.2
30637.9	115931
104034	50955.3
39760.1	38014.1
24935.1	21227.1
98354.2	25308.1
103888	155624
71514.4	118805
75689.4	24370.1
110918	107272
51462.1	33348.1
158339	80640.1
87423.2	129140
167636	208841
12514.4	310348
48492.4	52943.1
57458.4	25565.1
84533.1	65564.2
108818	90346.2
79452.1	51447.2
20782.1	61299.7
234569	96225.2
76528.4	199785
54333.2	14338.2
53903.1	63934.2
98599.9	122120
2199.86	137513
124307	34245.2
99561.4	41578.2
26401.9	45697.2
63250.4	87263.2
105081	34422.1
63166.4	50707.1
73330.4	27120.1
110698	58806.2
87487.4	19094.2
197322	21790.1
165566	59361.9
131946	17408.4
331262	97112.1
219947	25835.1
195513	61858.1
182374	25677.2
192844	214723
132936	37089.1
157704	112423
68190.1	59760.2
248284	35937.4
45724.3	12265.2
116674	79582.2
38641.4	35520.2
14390.4	81783.1
74345.4	16038.1
366641	39219.3
133061	41171.2
80545.1	87718.1
104183	50057.1
237414	57704.2
161769	59868.1
391237	84132.1
211740	77364.1
75341.1	85023.2
50303.3	41610.4
95713.1	283713
196938	111758
16094.4	338994
51064.4	29910.4
221522	189495
77494.1	17399
42372.4	40412.8
311995	131801
41920.4	29914.6
112441	54397.4
37032.1	154372
91283.2	18300.8
40080.1	148972
56613.4	215764
158704	23050.4
179127	87566.2
113506	17695.2
61161.4	82384.4
50182.9	100990
51528.9	31885.4
50484.9	73053.4
76572.4	16682.6
185757	70498.4
108976	7323.4
22637.1	21713.4
229310	145272
179129	6053.8
179713	30707.4
209137	10854.8
94859.2	16222.8
78546.4	5541.4
89215.4	31504.4
75111.4	20589.4
191916	31400.4
85049.4	51149.4
56825.7	70464.4
6942.43	59924.4
37585.4	9351.8
16892.7	63233.4
26397	67723.8
58409.4	103723
87768.4	126296
85240.7	25991.6
38349.7	68502.6
41431.4	42422.8
44069.4	9105.6
165632	22657.4
36000.7	213313
14167.7	6846.4
35280.7	166000
43228.7	32659.4
16413.4	65468.8
46189.7	1451.4
45228.7	39736.4
15851.4	47135.4
159098	209071
67474.6	47912.6
91991.7	45948.6
24360.7	52663.6
86085.7	94898.4
32434.7	37448.4
112875	27130.4
48310.7	62720.8
11669.6	18432.8
84150.7	9121.8
8305.69	102271
35625.4	34789.8
72063.3	27968
25320.7	23232.6
148286	79066.8
96999.7	-4948.2
115170	173813
110191	47796.4
61040.7	6255.4
67663.7	68324.4
160098	35146.4
80147.7	32031.8
143755	120818
11127.7	58610.4
42043.7	18430.8
24813	116926
159484	-2613.4
99291.7	-4672.2
91349.7	29602.4
40733.7	71261.4
155975	100851
40342	7938.8
15320.7	28672.4
75047.7	64672
30991.4	119399
83102.4	15681.6
138240	16716.8
134533	68647.6
49302.7	-12635.6
60318.7	84025.4
28333.7	43978.4
33388.7	140171
103028	60295.4
86345.7	14274.2
116707	15174.8
25768.7	9103.6
85162.7	53728.4
57649.7	23635.4
98813.6	32646.4
52977.6	46234.6
80354.7	252918
96125.7	129283
71259.6	2185.8
34390.6	117591
173773	122761
60815	38221.4
209069	172070
142637	868.8
40732.8	10625.8
123349	105359
191356	25202.6
27797.6	13915.6
134411	114501
39057.4	83435.8
23344.4	94948.8
127606	90467.4
239671	7875.8
79272.7	12379
11966.4	59777.2
94265.8	58221.4
66881	84671.4
98665.7	14029.4
81546.7	12962.4
240744	45377.8
90293.7	4620
32807.7	111529
92394.7	45114.4
55863.7	36926.4
14033.4	18399.4
32811.7	85509.4
247166	42601.4
98704.7	28032.4
18729	22891.4
78067.1	38455.4
29496.7	63751.4
103367	88503.4
93352.6	104641
61489.2	71394.6
83292.7	42982.4
119647	132754
129596	57655.4
50022.6	35348.6
64767.7	75750.4
54667.2	27127.4
108112	14505.4
88423.9	55782.4
18228.7	196227
24565.7	78638.8
79986.1	65413.4
23130	50078.4
31084.6	32117.4
53901.6	17267.6
96338.7	51667
71404.7	119972
107078	96944.6
28558.8	32552.4
34133.4	201951
73887.7	153097
65245.7	37747.8
166870	35471.8
145292	158255
87970.7	34350.8
84161.7	157703
59022.4	47665.4
20024.4	22999.4
168903	57872.2
193551	88633.6
231433	33878.6
88556.7	74751.4
115012	126192
45471.7	75248.4
3150.69	86652.4
41067.6	129689
101841	42477.8
89638.7	39669.4
123558	117127
67159.3	120854
190704	54440.4
58083.7	39127.4
41593.7	24909.4
11944.7	51682.4
36575.7	79757.6
147489	19568.4
120727	70545.2
25292.7	34054.4
117883	44058.8
66098.7	14147.8
60015.7	74421.4
101380	88922.4
57321.7	66573.4
167771	61722.4
167574	9551.4
27352.7	155236
213916	103658
59511.7	13777.4
183835	29371.4
48201.7	5217.8
75586.7	12770.4
82292.7	44734.4
37376.7	39540.8
52767.7	175234
20206.4	56125.6
189894	120876
100293	41234.4
153857	59416.4
41610.7	55111.4
36164.6	49808.4
27853.2	34254.8
125227	54038.4
97150.7	62690.8
94483	25077.4
212277	122699
2594.69	84509.6
17253.7	60232.4
94325.7	4448.4
61447.7	344817
135575	10857.4
168678	125700
55392.7	31680.4
98569.5	37630.4
124193	171622
226772	59785.6
37724.7	221680
92090.7	20644
25440.3	79245.6
118925	258338
160926	81661.4
149968	14129.4
52271.7	40254.8
123332	194092
73934.1	56919.4
93486.7	11658.4
44753.7	5996.6
135482	7311.6
240077	10424.6
58838.3	41642.4
113409	24089.4
138846	82718.8
181016	38712.4
77845.7	97515.4
109711	57098.4
68045.7	37068.4
157077	30434.4
71201.7	67188
152476	69981.2
78343.7	15092.2
137800	169499
81631.5	98393.4
186348	56189.4
20610.5	34598.4
55873.7	87307.4
74613.1	58036.4
187009	45335.4
162018	230078
172305	48734.4
101618	95529.4
42805.4	88330.4
25250.7	36136.8
92046.7	110571
131837	32438.4
20408.1	67526.4
40749.8	37871.4
29846.7	32782.4
126873	34311.4
7333.08	59818.4
66002.3	23053.4
98840.6	17520.6
262062	38115.8
182704	60678.6
248973	100896
15036.7	57619.4
107023	26173.8
189837	25816.6
32223.5	25061.8
15771.5	32399.8
73625.7	31875.8
65342.5	47147.4
55060.7	39829.4
114625	63150.4
49992.7	107373
64301.1	74782.4
153778	33139.8
178567	48020.4
23077.5	111284
44064.7	46872.8
19459.1	-1356.16
83487.7	47385.8
42698.7	50279.8
96912.7	117626
62294.7	78934.5
65591.7	13476.5
161526	11193.5
60777.5	57621.5
89998.7	79214.8
70028.7	13991.8
37038.7	20762.2
129387	43130.5
79950.7	109069
83675.7	59615.8
57549.5	105641
69925.5	15801.8
41127.5	16978.8
116620	72684.8
16082.1	7615.84
105277	92520.3
34365.7	98407.2
6933.67	49411.1
54132.7	87265.8
36387.7	2016.48
80524.7	18375.8
35464.7	79652.8
73808.5	17571.6
44778.7	38628.8
28338.7	38206.4
30642.7	40622.9
52639.7	47205.8
72834.5	32508.5
128924	43903.8
23629.5	65014.8
78905.4	132571
208395	44910.9
89496.7	30783.2
67808.7	2237.44
61098.7	41011.8
35714.7	164186
109966	154444
30147.7	264203
96234.7	35238.8
25122.5	141887
172667	15452.5
158.67	40065.8
155000	50417.8
10276.7	88604.8
157588	48313.8
135794	56030.9
67535.7	3781.44
206609	239606
181332	188802
147694	20518.2
79829.7	13891.2
95329.7	107901
49834.5	157073
258807	71997.8
81087.7	59721.8
86160.7	39301.8
180513	12617.8
120751	55998.8
98596.1	126426
43173.1	72304.5
88277.5	31255.5
126643	14400.8
73721.7	82160.8
142142	37483.5
7549.67	95335.5
107951	13472.8
108493	20373.8
83263.7	17710.9
12571.7	27866.4
40474.7	54409.8
150527	42150.8
131151	53740.8
111711	108803
51476.1	35302.8
40732.1	133836
145036	128652
52655.7	20999.8
56235.7	43081.5
162952	51801.8
225013	48240.5
93524.7	25821.5
181831	63021.8
299531	28774.8
16201.7	25783.5
144666	96286.8
142007	10443.8
187219	96671.8
98965.7	6353.84
72273.7	53413.8
32101.7	10229.8
79250.9	7210.84
80656.7	28824.8
336218	73051.8
78402.7	38783.8
146966	7425.48
114450	29415.8
207964	12825.8
60259.7	18261.8
126892	36663.3
34793.7	10357.8
42354.7	10536.8
58326.1	15472.8
95012.7	6189.48
56950.5	30155.8
84953.7	25201.8
184605	21020.2
36616.5	57711.8
78522.5	7913.44
247033	35068.9
155980	106477
46620.5	24305
251402	25229.5
116079	11459.4
259539	29947.8
208855	65456.8
152807	1364.84
84536.5	26635.8
115670	428.84
138976	14709.5
122925	10934.5
72872.1	25214.1
59708.5	8864.88
152610	-4730.56
66009.5	19552.3
72436.2	19877.5
167589	20786.3
57724.7	16986.8
75351.7	-3032.16
84914.7	48973.8
219293	37138.8
848418	10930.8
36861.1	20554.1
93051.4	82278.4
128608	17723.5
170830	31867
184085	49333.8
160961	39467.5
64599.5	59611.5
79832.7	52405.8
237648	57317.8
19867.7	13787.8
170041	41688.8
58100.6	44650.3
59022.6	30669.8
21275.7	862.84
119553	447.8
190206	36484.9
181806	17964.8
241922	82298.6
283833	34608.8
107189	20802.8
7767.44	46989.8
12330.4	44469.8
44962.4	13499.8
245210	47633.8
143136	93992.8
265624	82583.8
12626.4	11037.9
453493	35006.8
398984	138413
117191	111243
77844.4	76078.8
134288	43913.5
109410	48901.5
44116.4	77693.8
72703.4	22621.8
172350	139710
50340.4	32334.8
85310.4	52102.8
42867.4	1712.84
128128	40658.8
392687	22470.8
183386	20310.8
138249	20978.9
452693	208245
303429	29661.8
47248.4	19242.8
236646	19227.8
54706.4	33330.5
272241	13209.8
34029.4	109736
71905.4	21535.8
311689	42432.8
43824.6	22851.8
222635	67921.8
221978	104038
446608	4016.84
151984	36962.8
347752	33179.2
202288	14455.8
61190.7	72490.8
302476	13160.8
161718	35158.5
278080	48792.7
402507	128604
239662	158040
210588	35517.8
322244	13297.5
88993	161579
322636	56980.8
236686	10688.8
73524.4	96614.8
83787.4	46193.8
222087	69443.9
87884.7	35622.1
260251	84769.5
164817	40750.2
63288.4	126732
208412	126577
142249	122669
377498	41642.8
55186.4	45231.2
194200	58676.5
29583	95581.6
523387	71377.5
225205	29969.2
119368	45473.2
403395	361259
410398	83905.8
500382	96148.8
402734	29706.2
238356	63183.8
148041	161460
150217	16357.4
215632	48150.9
336156	99663.8
269597	45984.5
294299	24493.8
189135	36498.8
383971	40835.8
280201	36216.8
294292	64199.3
376400	47221.8
278769	51688.8
366469	91041
345496	57735.8
140953	42313.8
180262	48457.8
181231	33075.8
229007	22457.8
290542	24185.8
4233.04	113227
39308.1	247083
110637	44252.5
291161	59250.5
435005	43153.8
363763	44286.5
103143	55392.8
605606	87879.8
330456	54715.6
341318	55705.8
117178	64553.8
121014	57348.8
148665	39730.5
292159	55015.8
106659	62572.6
439236	19535.5
214467	31907.8
462627	45553.5
359815	84195.5
170390	178105
321346	31039.8
152029	61994.8
226160	147532
46678.2	68126.8
27712.8	16828.1
96511.2	130598
246069	153686
216636	166858
71408.8	72779.8
139060	82269.6
193759	49246.9
393526	34397.8
265095	27577.5
188267	66385.6
294661	86674.8
435961	105825
283436	108850
231630	13484.1
213778	40736.1
11588.5	63336.8
44227.8	29081.8
207195	22541.1
87610.4	36924.1
8383.97	35418.6
464711	18773.1
205230	88807.6
149496	84356.1
31958.8	19506
357443	29783.1
222551	16927.1
477010	60809.1
42503.2	9050.06
461813	69734.1
178747	71495.8
99277.7	62811.2
200934	42535.4
414703	9106.44
312252	14201.8
145988	22607.6
807662	13566.1
65979.2	78219.1
149969	60785.1
185318	72181.9
418242	26732
118211	66216.1
149077	53106.9
220446	43821.1
152698	97190.4
22588.2	17047.2
114910	10318.1
192709	65862.1
344557	126423
237527	6895.82
51585.8	13488.1
31032.4	35354.1
173323	80849.9
127051	3523.82
305133	43845.2
300615	31469.8
168486	17970.1
134054	10385.6
84483.8	23657.8
115290	34592.8
105140	51503.8
255439	6276.06
158854	43876.1
89865.2	85278.6
186843	16259.1
36563.2	8862.06
89017.2	30914.8
110023	29607.8
274878	84465
89132	33383.4
161687	33510.4
164741	20510.4
90596.5	67032.1
138926	40603.1
363035	101477
344637	139328
39769.7	67690.2
171473	193452
50064.2	36840.8
85502.5	31891.3
160893	38761.7
199696	23864.7
46594.5	100858
148465	42781.4
94535.2	173472
127327	43960.4
23977.2	68995.8
141607	31398.1
244259	151257
216576	9326.06
201122	24635.1
106711	155629
10803.8	21981.8
226471	69002.9
125932	30624.8
184066	36586.8
126659	60131
75407.3	23165.4
1033.23	106699
37994.2	39256.1
58053.5	8131.06
73531.2	38106.4
27454.8	64537.4
30095.2	16015.1
5597.1	57600.1
15062.2	38882.1
5214.23	32701.8
35769.2	56221.1
58892.4	24163.4
10474.7	24600.4
56663.2	10457.1
56524.2	51806.1
29677.2	18792.1
40052.2	32435.1
20061.2	17311.1
40607.5	16762.1
8484.52	115221
96086.2	15453.1
20701.8	77679.1
12518.2	-392.56
73501.1	33561.4
52361.2	54124.1
42431.2	16207.1
83398.6	12876.8
46789.2	13115.8
35429.2	26589.1
30790.2	50294.1
23110.4	49701.1
18411.7	563.06
200696	45626.1
203698	16577.1
28567.8	-827.18
324921	156793
198979	8873.82
129509	56080.8
68165.5	22943.1
185796	21271.4
109257	95909.4
111602	-664.94
38253.4	16474.1
69083.2	35150.6
26435.2	37039.4
30108.2	8964.82
28857.2	103888
44731.2	28306.1
72889.2	34429.6
16506.2	4321.06
52254.2	10899.8
14092.2	4702.82
64489.2	14519.1
178727	53687.1
101531	33354.1
91495.2	-3682.94
66270.2	-5425.94
34666.8	61986.1
32756.1	9754.06
52578.5	59672.4
138078	11309.1
23976.2	67438.1
139919	7687.06
292995	27341.4
114893	21576.1
201108	60714.1
224688	45943.1
97714.5	45623.1
14248.5	57557.1
88107.2	53496.1
42930.2	2546.44
163001	-954.8
63615.2	17860.2
11881.2	8007.82
21527.2	33072.1
25451.2	10834.1
148053	4200.82
86094.2	33747.8
45649.5	59399.8
141640	12885.1
83802.2	65527.1
143284	6802.06
115325	20993.1
47877.8	50155.8
95561.2	53264.8
141363	17964.1
68408.2	31276.1
37884.2	9998.06
29442.8	42120.1
44292.8	10696.1
49568.8	47444.9
53569.1	28770.8
45306.8	44126.8
43357.2	17481.1
32271.2	33293.1
62286.2	38247.1
37009.8	104369
100572	79280.4
123427	12352.1
20385.1	43464.1
157865	46425
176723	12415.1
37759.8	107340
69633.2	12499.8
84760.2	41917.1
110289	54504.6
54156.2	72128.9
29154.4	31150
84167.2	112874
134289	74852.1
93160.8	99977.1
36511.5	56535.1
150119	71595.1
219376	99244.9
96597.2	70548.1
22936.2	42230.1
300409	74583.8
72267.8	32318.4
234626	34588.2
56183.2	125277
67069.2	34433.1
19538.2	20948.8
232297	1499.82
106307	1349.06
59633.2	26479.1
69174.2	43248.1
196962	30788.1
161286	38873.1
160435	42164.1
19817.2	39396.1
44250.2	21093.1
16041.4	109725
147456	116713
56720.2	42331.1
84026.5	35222.8
225394	46601.8
297240	8907.72
352173	35644.9
233277	52617.9
198082	18780
71919.2	22311.1
34638.2	31798.4
216900	29630.6
55980.1	24349.1
27223.1	55042.1
31531.3	46020.4
42158.8	19041.4
62101.2	140563
166353	67690.8
66537.8	66649.8
51101.8	16336.1
51296.2	24350.1
249476	88271.5
16841.2	132240
55643.5	20732.1
54064.8	131170
63001.1	200210
25345.2	57632.4
39986.1	80936.4
178448	319817
239350	27590.1
116558	82269.1
45435.2	12736.1
79755.2	37957.1
117196	42017.5
106095	73547.5
251312	29525.1
126621	19780.9
309801	88966.2
31669.5	37964.1
311457	73753.1
109380	26513.1
68906.2	14339.1
146170	67611.1
229393	28263.1
301644	29610.8
128946	9379.06
334703	114008
367707	79999.6
80695.2	14703.8
247620	19617.8
42091.9	60942.1
267585	25282.1
277401	28300.1
196527	184862
256257	19242.8
33437.9	38649.8
271600	82547.6
183944	53866.8
79914.9	24325.1
120222	23007.4
73284.1	11356.1
182254	19292.8
114682	60688.1
220000	78177.1
65577.9	94314.1
99117.9	34299.1
147409	49671.1
75508.9	34890.4
137230	15029.8
339852	17179.4
144056	18889.1
126430	4574.06
135006	50838.1
240435	13419.1
452960	36548.8
140628	25244.2
209519	25578.1
120092	35852.1
354630	6588.96
164017	18602.9
145614	40947.9
64878.9	3147.82
124573	22564.8
290038	18541.1
92440.9	32579.1
178170	48603.1
64621.6	42127
116289	23574.1
268936	15290.1
100040	20006.1
165185	21813.1
350350	24462.1
208522	3114.89
192432	-3972.11
111592	14689.9
281873	9803.89
31319.9	-4012.17
314443	29461.5
122388	-6980.76
199522	-3489.11
128161	20720.9
322464	16360.8
117865	-12350.6
116101	14933.9
50900.2	10315.8
154374	62283.9
151063	-5316.17
169970	5075.83
147420	-5810.11
171227	17003.8
35848.9	10345.4
199494	-4525.11
163509	4054.24
157505	13572.5
74331.9	49449.9
88186.9	30141.8
25782.9	13156.9
294425	59431.9
186581	22146.9
393674	55346.4
52735.6	6937.89
248078	2308.89
284987	30403.8
319622	71849.9
192168	44201.7
192382	55168.8
77359.9	33146.9
344432	70975.9
41286.9	54260.7
230789	24822.9
388849	83921.9
126754	30897.7
45959.9	99295.7
249522	70294.4
36320.9	19060.2
163474	39788.4
93225.2	53238.4
141909	18789.4
295014	51358.4
20301.7	74939.4
25530.7	92459.7
56674.5	14084.4
196885	32326.9
348252	11528.9
62529.6	65977.8
193183	31755.8
71942.1	37456.3
44921	30316.4
127511	61539.9
89808.9	27973.9
117043	90344.9
89869.9	28933.9
160941	75471.9
182120	132895
64796.9	37421.9
137951	63136.9
92377.9	108131
122962	40200.9
26725.9	69706.7
44692.2	2482.89
243212	16846.9
167505	721.3
39525.9	13943.3
28342	8261.36
111613	37897.9
351661	2190.83
382979	62950.9
35365.6	3855.89
313976	49514.9
192410	48666.9
145497	38907.9
136288	10099.7
177416	-2349.29
97351	-1818.52
185819	21268.9
89373.9	35062.8
48030.9	-5844.17
334956	-6663.17
91449.6	-7503.11
105765	-4837.11
44817.6	21278.4
48370.6	6486.36
70770.9	34438.7
193686	10461.9
98487.2	-3508.11
150588	-485.11
61792.9	21390.9
149464	-4368.11
45563.6	2674.83
143002	15154.8
164360	46280.9
365216	15347.9
121767	29431.9
231270	1894.83
61369.9	-8807.64
132841	27017.9
148772	-49.11
67800.2	17948.9
162640	-6444.64
86516.9	10719.9
77627.9	5722.89
115633	-1278.11
71803.9	51776.9
163765	35591.9
107230	44120.7
25375.9	64647.9
118992	46449.9
276206	43042.9
79103.6	44406.9
48570.6	25956.9
22454	36047.8
38863.1	31368.2
125347	64253.5
40067	10120.8
79838.9	79948.9
43562.9	9763.89
40737.6	26967.9
115042	80571.7
186718	35185.4
163278	67646.9
80126.9	23494.9
18754.9	3351.89
60423.2	23772.9
40751.2	3070.89
13097.9	22592.8
175350	4224.83
85440.9	6980.89
39985.9	72613.9
261036	73857.9
406783	28814.9
49089.9	49567.9
55717.9	18880.9
319575	77182.6
345820	24826.8
62831	18994.9
145864	21377.8
53281.6	57968.7
408317	99444.4
395554	9233.24
326908	18394.8
143464	32826.9
230566	40761.9
147568	9554.89
159739	43470.9
23028.9	65708.9
331111	31880.9
95384.2	25091.4
42529.6	30957.9
261655	43634.9
77845.9	27360.9
94712.9	35954.9
319938	77498.9
14426.9	86290.9
14638.9	18347.9
83445.9	32075.4
383017	25113.2
110934	89004.9
254793	68659.9
227556	38256.9
42701.9	15995.9
177412	125527
144324	46721.9
197318	35801.9
529677	27657.9
48081.8	47274.9
91142.9	47773.9
82030.9	112091
143068	38665.9
248876	66600.8
88974.4	59712.9
58605.2	47473.9
202087	39536.9
221991	77131.9
139319	43044.9
167575	90646.9
188525	128915
22951.6	30714.8
105960	51844.5
68152.6	98213.7
217851	90357.7
101367	22653.4
158950	81641.4
206627	27617.9
118898	53575.9
98348.2	28233.8
63326.3	23667.9
209855	31247.7
300547	62282.8
49491.9	82257.5
206463	2950.89
193996	12082.9
127189	42552.9
404008	73808.9
95107.2	15989.2
76988.6	26254.5
59985.6	56462.9
148923	34780.8
98504.9	26315.8
54070.9	30401
134884	98992.7
125627	3374.89
61940.2	95190.9
84952.2	89030.9
168656	78715.9
56245.9	24688.9
118299	100690
73335.2	102442
207383	24371.4
128893	20585.4
149459	97438.8
618314	108853
301257	78050.6
79921.2	126196
129335	36663.6
223452	52908.2
223440	71154.2
149849	36756.6
188075	191479
180185	57984.8
102061	86518.6
113285	92922.4
46292.3	65281.6
53876	28536.5
201550	105836
107147	90947.6
80598.4	7303.2
194079	102543
328463	91201.6
161056	30937.5
239416	990.55
190760	147863
172295	48033.6
28154.9	77795.6
30406.9	130991
55970.9	19233.2
67077.9	72436.6
69361.9	48736.7
108623	89334.6
225558	64332.6
58422.2	42373.8
58269.2	65750.5
267203	37208.4
51828.6	95626.6
92283.6	38528.8
92943.2	137644
60933.8	65286.6
157799	68077.6
122866	28686.8
47036.9	79183.6
121289	25208.6
39042.2	32107.8
99477.4	48193.2
176984	52959.6
88631.9	125200
89978.5	24336.5
29432	30388.5
26889.1	32840.8
76188.6	42058.2
33327.7	38312.6
59816.6	85478.6
38185.1	85099.6
13367	68528.6
79799.1	175947
68143.1	145218
62877.3	85370.6
18156	83784.6
52442.3	38198.8
37960.1	93770.6
144048	12961.5
45262.8	3566.2
122460	49182.8
34256.1	10290.9
17968	113997
25121	156537
5451.05	282364
35847.1	34227.2
45474.1	134085
-9609.5	34948.6
51991.1	38795.6
7723.65	57757.6
76687.1	379499
128824	640.2
40386.1	67715.8
12982	67962.6
7818.05	39269.6
114468	41820.2
54773.8	50231.2
16367.8	85559.4
11316	73188.6
52107.2	51284.6
46944.7	38965.6
54166.6	180551
59629.1	109251
49187.1	13029.9
8427.35	143769
162031	49064.6
25779.2	96980.6
19811.2	43375.6
26187.3	23365.8
174676	61144.9
37724.1	193715
136136	39773.6
49676.1	155932
73473.1	27524.5
33522.1	27263.8
168977	129688
64675.5	878.8
108564	20499.1
43498.1	12936.5
101241	88511.6
19291	-7908.45
27635	98136.6
44583.3	19223.5
10893.4	246302
52663.1	99598.9
73691.1	49639.6
120757	60354.6
271059	59382.2
82528.1	18082.8
72919.1	102147
50342.3	46134.5
45369.1	52162.6
125866	91151.6
70630.1	72110.6
74391.1	46787.6
265524	85866.6
74898.1	158360
119406	72131.6
134248	18574.8
95804.1	77197.6
122538	76906.6
120380	42947.8
47452.3	133408
67194.1	213631
45868.1	145839
72248.1	30460.8
109839	27630.5
46935.3	81457.1
164037	24802.5
215939	50727.5
228256	57338.6
42715.2	111056
64820.8	27589.8
25435	68803.6
373123	139715
48421.1	92492.4
173536	34336.6
160457	115405
313765	32877.6
77468.1	29424.8
108260	54216.8
84255.6	12672.9
223764	83302.6
152341	94373.6
154502	86645.6
39170.1	24866.5
65731.1	46647.6
88924.1	86521.6
84020.1	4507.35
139926	175090
120011	191632
20856.3	23605.5
36377.1	70659.6
115914	36157.6
125661	44205.8
222276	155169
124712	25707.2
34850.1	24682.5
204327	83800.6
214267	39749.6
98138.4	56504.8
124578	65658.6
122698	11505.5
150494	30348.5
73139.4	23472.8
52510.1	14156.9
119028	40470.6
211320	46943.6
113579	55101.6
45505.1	61064.6
117960	72345.6
317412	137371
162527	121919
58504.1	62435.8
80786.1	34954.6
139543	35621.6
58299.2	45531.6
164383	18566.2
21765	17304.5
147487	27089.5
84302.4	57823.3
201639	116098
104486	34055.6
103922	38586.6
68351.1	78158.6
199621	61308.8
98514.2	51502.8
73761.6	65125.6
132321	19996.5
70503.1	34442.8
141261	75725.9
69645.1	148635
46076.1	50814.6
74894.4	125136
145789	35937.8
189864	23059.8
93967.1	316.85
352191	18360.5
153557	66062.2
28670	45328.6
61335.3	81918.6
147695	41222.8
162491	123026
50147.1	108441
161243	2897.2
13653.9	22370.5
18432.8	59683.3
59321.8	193753
25399.8	8539.55
26586.8	104841
823.85	58636.6
29601.8	25169.5
55367.8	94405.1
31375.8	57044.6
41677.8	82812.6
16211.9	24826.5
23370.8	50828.6
26077.8	143433
16996.8	195229
67801.9	149524
48956.8	38628.6
21024.8	62501.6
25890.8	52228.8
10414.9	145105
-3112.15	44519.5
2921.85	40264.6
94208.9	198486
5942.85	100229
14797.9	80071.6
29708	12329.8
13568	106894
36428.8	171449
22230.8	12923.5
56107.8	6572.55
32267	40267.8
27495	42975.4
12521.9	22401.8
15949.9	62346.6
103321	33663.6
47573.5	17723.8
10456.9	113285
13368.9	75869
41839.8	37739.6
21590.8	66617.6
61026.8	52165.6
12264.9	36058.2
110121	9592.2
48154.8	38831.2
29791.8	111770
18077.8	39335.6
64825.8	52837.3
65688.9	29218.8
30375.5	52609.8
66691.9	9453.1
76708.4	48732.2
225429	27738.5
134682	4705.55
28900.4	8443.55
16798.9	55697
38556.9	29444.3
69633.9	81155.6
81928.9	115558
39631.8	85477
52869.8	112510
34037.8	25254.5
26782.8	61243.9
31676	165064
110556	44698.2
43462.8	140357
84078.9	24476
92450.9	119225
62611.8	101129
84486.9	77938
91740.9	117907
35717.9	52877
78982.9	10043
70025.9	127905
56503.4	192041
21340	176569
69477.9	178079
43637.8	136172
82965.6	11419
67846.6	50198
128640	13037.9
138267	49584.9
216739	101082
3354.4	106147
168305	40658.9
112474	10916.9
182704	63762
242622	30654.5
102047	25609.9
238036	121406
126817	109039
22939.7	1410.4
98103.6	6783.94
202385	26312
71704.6	97236
216976	92465
25017.5	96599.9
74487.6	49290.9
243641	104573
59130.7	166829
107433	7842.02
29980.7	127520
53771.7	51074
161203	17121.4
279564	88977.9
38199.7	24170
370463	45991.4
174149	60221
120826	23396
273296	98865.9
131732	19135.9
167947	45641
9343.6	48540
30690.7	153922
215487	170471
36598.7	16567.5
28182.7	34056.9
213115	32018
235519	141184
124862	9090.02
151521	93690.3
234952	164961
85255.6	16149
87626.6	3917.02
66811.6	120297
173766	105706
102801	27269.8
200184	148208
272568	8196.32
27775.7	16073.3
74658.6	27783
151137	28012
41833.7	-3600.98
456295	56698
50226.7	28495
76790.6	77996
206473	25240
60420.7	66531
32718.5	1579.02
31365.7	72035
132555	45538
50797.7	28663
90123.6	10779
80639.6	17599
172549	77067
180645	115432
87036.6	98644
144349	18787
55858.7	27218
337847	22121
99588.6	12668
73442.6	39751.9
216729	6913.02
68106.6	79078.9
371957	157633
39781.8	55101.6
211749	25238.3
8220.35	3734.32
80597.6	36374.6
339006	45888
43804.7	-3064.52
40920.7	49733
140265	19351
216075	24875
19541.2	65980
128309	61582
93915.4	40435
219323	14793
281006	155689
151907	40288
81879.6	37326
37333.7	66523
88723.6	178676
65660.6	62144
49331.6	132318
156786	75217
14361.6	21474
187572	31584
88855.6	19007
46816.6	39073
170581	11421
196220	11169
248495	20675
273693	59104
102137	86477
23096.5	11028
42097.7	130350
69383.6	65798.9
177117	68479.9
121690	6021.02
41596.7	33304
66842.6	45183
58853.7	165575
40751.7	8327.48
120808	54292
267620	17675
29837.5	33445.5
116573	55482
110146	124892
203331	84823
184607	13720
127534	36713
94591.6	22847
59738.7	60940
97548.6	13749
102056	71119.9
62862.7	52178.5
47210.6	267613
129094	93717.9
150707	33271.5
65438.7	69827
147910	33765
90652.6	105061
151818	172434
93231.6	212372
151105	37577
264014	35393
98814.6	85426
209069	57586.5
156984	23311.5
42975.7	43919.5
176983	16972
181440	34614.9
278087	129737
182103	123287
187254	69166
255272	31693
39957.7	45835
95954.6	70636
122106	52063
38860.7	73036.5
75863.6	75600.5
83650.6	149652
109331	29286.9
66565.6	12143.9
313679	99451
237519	128988
46657.7	31809
53458.7	33414.9
278199	38794.9
268017	17528.5
356097	41452
123598	72905
398394	40320
132159	64999
166042	51498
227522	179126
137577	94735
126665	80938
54325.4	18138
262073	71502
89326.6	90117
183392	35049
253795	20672.5
188943	35728
57184.7	50749
309885	137422
140935	107565
478702	51159
237730	26283.9
151507	126534
257082	59611.5
49121.7	40044.9
80564.6	39556
171403	52721
251037	58172
272407	63136
150543	58509
36360.3	32854
92386.6	50435
53907.7	96297
44203.7	147543
73879.6	8579.02
90126.6	15227
93641.6	53851
52700.6	71284
194229	9091.48
261524	22537.5
87337.6	25636
55924.4	46737
235703	65586
172248	64320.9
438162	30252.4
286953	147613
118414	32269
61985.2	28120
118972	8909.02
63564.6	27040
64030.7	6442.02
149963	12834
76816.6	8609.02
27555.7	32768.9
16329.6	43868.9
91625.6	204677
46995.7	90724.5
128945	29500.5
101527	13975
184066	82090
88308.6	28920
102485	111809
87682.1	39300
355592	50096
296517	77864
40447.4	69869.6
94528.8	959.32
76218.6	95743.9
90101.6	24026.7
111289	22477.9
222408	159439
55905.7	23145
181372	57402
58825.3	113019
260513	52750
232569	5675.86
56818.5	21136.8
144098	58071.8
287950	-1141.5
135523	33034.8
348097	11667.8
248017	3889
327569	6125.25
220524	4567
179055	19937.8
112387	-858.25
215595	-5664.75
157462	20806.8
134195	-1054.75
173038	73566.8
231164	71538.5
59459.5	-12649.2
91911.5	1584.75
414510	-10918.2
261225	-4139.25
107028	25577.8
95605.5	-4206.25
99353.5	28669
21738.5	2799.75
66914.5	15733.8
83592.4	9489.75
111834	24294.8
160912	11363.8
27588.3	76878.8
42659.4	29251.8
88775.6	9579.75
112862	14521.8
89501.5	3741.75
58353.5	20358.8
90051.5	11560.8
76966.5	1195.75
161772	982.25
32228.5	17473.8
57688.5	11300.8
88866.5	122856
196391	18697.8
112554	28856.8
147224	9559.25
246202	16638.5
40742.6	28735
102136	115020
207238	74244.8
134419	7710
46359.5	795
35593.5	17149.2
117346	36902.2
123508	6086.75
37741.4	2791.25
104560	39710.8
69146.4	16042.8
74498.4	54705.2
284087	57711.2
27456.5	217265
160065	16829.8
203406	24873.8
222014	19813
266237	7380
165008	61815.2
251930	10963.8
39923.3	79139.2
138940	11202.2
195231	3948.75
48481.5	25840.2
122140	-438.75
196335	42365
63230.5	12247.2
293375	102299
230069	32025.8
79903.5	42903.8
169313	-1292.25
226150	14882.2
241305	53225.8
213612	54618.8
100050	36254.8
30667.5	48326.8
110924	71418.8
92636.5	139700
270214	9131.75
135514	13357.8
169702	22863.8
114096	41785.5
263104	9982.75
241269	24604.8
249790	9372.25
104693	21251.8
187805	-8518.25
274667	20031.8
340157	26019.8
288937	33715.8
140746	7162
92929.5	11961.5
141983	20873.8
204949	17408
83458.5	625
161231	36500.8
57422.5	18308.8
148383	4664.75
264186	20575.8
22531.5	76069.8
36661.5	93953
163634	49745
270014	19233
171044	138068
35582.5	-7600.25
75310.5	12343.8
211634	12090
179305	7909
236156	23403.8
95174.4	21166.8
86108.4	-4554.25
15285.4	33286.8
150153	27520.8
141223	25996.8
95351.5	32662.8
131951	29775.8
73221.5	46363.8
117578	68839
184224	42879.8
279220	20608.8
189358	9709
101418	28774.2
113554	18126.8
79972.5	-1407.25
55242.4	55001.8
14994.4	-8131.25
121349	123826
62861.4	60645
140504	26777.8
232803	31664.2
325880	20445.8
139158	44019.8
93759.5	24227.8
134499	36164
127746	59472
147084	16988.8
450979	65216
294123	-7508
155549	41834.8
97323.5	138930
201927	15857.8
449256	14687.2
463158	35755.2
135860	28604.8
53963.5	132814
419512	123834
248124	97421.8
105026	16713.8
251674	102631
97859.5	93941.8
150933	21227.8
75626.5	23536.5
39498.5	44706.8
404391	34582.8
53421.5	23134.8
374053	52004.8
110967	4618.25
185281	37204.2
91252.5	66068
137176	-6111
127033	41106.8
172744	-283.75
310152	19419.5
64021.5	49013.8
79062.3	28478
61274.3	2147
230184	-5815.25
97034.5	1255.5
110294	16409.8
413807	8256.25
134992	40325.8
604427	26564.8
75519.4	-12310.8
201463	22115.8
93084.5	22614.8
94097.5	30329.8
238460	47665.8
121733	32229.8
382400	8119
192062	47696.8
69575.5	31640.8
174826	21515.2
162577	-3101.25
56856.4	4852.75
217273	25656.8
212152	2842.75
81361.5	29084.8
264812	17582.8
208953	-624.25
67196.5	67146.8
67400.5	62151.8
250513	85140.5
75789.4	26695.8
110873	12967.8
131442	65806.8
138986	13968.8
30866.5	14859.8
[truncated: 1,820 more rows]

## Sheet: Figure 3S2D
Avg. AZ Cac-GFP (Max AZ pixel intensity)				DESCRIPTIVE STATISTICS				T TEST
CacGFP	CacGFP/+				CacGFP	CacGFP/+		Table Analyzed	Quant_Control_Ave_AZ_MAX
16038.7	11899.3			Number of values	14	14
14255.4	10885							Column B	CacGFP/+
17108.2	9321.39			Minimum	14255	6607		vs.	vs.
31221.6	8012.56			25% Percentile	16841	7968		Column A	CacGFP
20960.5	6607.06			Median	22060	10892
23535.9	11443.5			75% Percentile	24936	12185		Unpaired t test
14389.2	10898.8			Maximum	31222	14621		P value	<0.0001
23473.6	6753.13			Range	16966	8014		P value summary	****
25227.6	7834.92							Significantly different (P < 0.05)?	Yes
24838.7	11718.4			Mean	21434	10552		One- or two-tailed P value?	Two-tailed
17553	13041.4			Std. Deviation	5110	2568		t, df	t=7.119, df=26
23159.5	14621.1			Std. Error of Mean	1366	686.2
27836.2	10480.6							How big is the difference?
20472.2	14213.5							Mean of column A	21434
								Mean of column B	10552
								Difference between means (B - A) ± SEM	-10881 ± 1529
								95% confidence interval	-14023 to -7739
								R squared (eta squared)	0.6609
								F test to compare variances
								F, DFn, Dfd	3.961, 13, 13
								P value	0.0188
								P value summary	*
								Significantly different (P < 0.05)?	Yes
								Data analyzed
								Sample size, column A	14
								Sample size, column B	14

## Sheet: Figure 3S2E
Avg. AZ Cac-GFP (Max AZ pixel intensity)				DESCRIPTIVE STATISTICS				T TEST
CacGFP	CacGFP/+				CacGFP	CacGFP/+		Table Analyzed	Quant_Control_Ave_AZ_SUM
91812.6	66315.6			Number of values	14	14
81837.2	64877.8							Column B	CacGFP/+
104456	55508.9			Minimum	79800	31748		vs.	vs.
209599	44733.4			25% Percentile	100629	43607		Column A	CacGFP
130331	36872.6			Median	131798	63471
147304	68224.1			75% Percentile	152401	70867		Unpaired t test
79800.3	62064.5			Maximum	209599	89553		P value	<0.0001
137070	31748.1			Range	129799	57805		P value summary	****
150407	40228.9							Significantly different (P < 0.05)?	Yes
158383	69907.2			Mean	129806	60724		One- or two-tailed P value?	Two-tailed
103568	73747.2			Std. Deviation	36383	17670		t, df	t=6.391, df=26
133265	89552.8			Std. Error of Mean	9724	4723
169298	58241							How big is the difference?
120155	88108.6							Mean of column A	129806
								Mean of column B	60724
								Difference between means (B - A) ± SEM	-69083 ± 10810
								95% confidence interval	-91303 to -46863
								R squared (eta squared)	0.611
								F test to compare variances
								F, DFn, Dfd	4.239, 13, 13
								P value	0.014
								P value summary	*
								Significantly different (P < 0.05)?	Yes
								Data analyzed
								Sample size, column A	14
								Sample size, column B	14

## Sheet: Figure 3S2F
Total Cac per NMJ (Sum)			DESCRIPTIVE STATISTICS				T TEST
CacGFP	CacGFP/+			CacGFP	CacGFP/+		Table Analyzed	Quant_Control_TOTAL_NMJ
2.63745e+07	1.51826e+07		Number of values	14	14
1.93038e+07	2.3499e+07						Column B	CacGFP/+
3.07621e+07	2.04806e+07		Minimum	19303759	7448388		vs.	vs.
3.06493e+07	16970917		25% Percentile	29580629	15365508		Column A	CacGFP
4.97729e+07	7.44839e+06		Median	34674988	19537330
5.81201e+07	2.22232e+07		75% Percentile	43755762	25097178		Unpaired t test
2.19356e+07	1.8594e+07		Maximum	58120078	37793811		P value	0.0001
3.87512e+07	7.79254e+06		Range	38816319	30345423		P value summary	***
4.37106e+07	1.55578e+07						Significantly different (P < 0.05)?	Yes
3.47234e+07	2.96622e+07		Mean	36003272	20063946		One- or two-tailed P value?	Two-tailed
3.46266e+07	2.52013e+07		Std. Deviation	10545425	8141039		t, df	t=4.477, df=26
3.36597e+07	3.77938e+07		Std. Error of Mean	2818383	2175784
4.38913e+07	1.54265e+07						How big is the difference?
3.77647e+07	2.50625e+07						Mean of column A	36003272
							Mean of column B	20063946
							Difference between means (B - A) ± SEM	-15939326 ± 3560523
							95% confidence interval	-23258085 to -8620566
							R squared (eta squared)	0.4353
							F test to compare variances
							F, DFn, Dfd	1.678, 13, 13
							P value	0.3626
							P value summary	ns
							Significantly different (P < 0.05)?	No
							Data analyzed
							Sample size, column A	14
							Sample size, column B	14

## Sheet: Figure 3S2G
AZ Number			DESCRIPTIVE STATISTICS				T TEST
CacGFP	CacGFP/+			CacGFP	CacGFP/+		Table Analyzed	Quant_Control_AZ_Number
239	202		Number of values	14	14
209	340						Column B	CacGFP/+
226	336		Minimum	129	202		vs.	vs.
129	361		25% Percentile	211.3	265.5		Column A	CacGFP
315	240		Median	244.5	318
355	300		75% Percentile	279	361		Unpaired t test
242	290		Maximum	355	384		P value	0.006
247	273		Range	226	182		P value summary	**
270	369						Significantly different (P < 0.05)?	Yes
197	361		Mean	246.6	309.8		One- or two-tailed P value?	Two-tailed
306	384		Std. Deviation	55.46	56.22		t, df	t=2.995, df=26
212	357		Std. Error of Mean	14.82	15.02
251	255						How big is the difference?
254	269						Mean of column A	246.6
							Mean of column B	309.8
							Difference between means (B - A) ± SEM	63.21 ± 21.10
							95% confidence interval	19.83 to 106.6
							R squared (eta squared)	0.2565
							F test to compare variances
							F, DFn, Dfd	1.027, 13, 13
							P value	0.9618
							P value summary	ns
							Significantly different (P < 0.05)?	No
							Data analyzed
							Sample size, column A	14
							Sample size, column B	14
