# Supplementary material for: Regulation of presynaptic Ca2+ channel abundance at active zones through a balance of delivery and turnover
Source: eLife. 2022 Jul 14;11:e78648. doi: 10.7554/eLife.78648 (PMC9352347; doi:10.7554/eLife.78648)
Supplement: Figure 3—source data 1. [file elife-78648-fig3-data1.xlsx]

## Sheet: Figure 3B
Single AZ Cac			DESCRIPTIVE STATISTICS				T Test
Control	Cac OE			Control	Cac OE		Table Analyzed	CAC OVEREXPRESSION
12436	10409		Number of values	3663	3145
20000	11579						Column B	Cac OE
10724	12090		Minimum	459	-690		vs.	vs.
12447	13188		25% Percentile	8840	8494		Column A	Control
8237	11584		Median	13128	12731
7064	9809		75% Percentile	18625	18713		Unpaired t test
8840	14482		Maximum	59403	57211		P value	0.2357
17807	15678		Range	58944	57901		P value summary	ns
18610	10001						Significantly different (P < 0.05)?	No
19450	9504		Mean	14617	14383		One- or two-tailed P value?	Two-tailed
15791	23170		Std. Deviation	7917	8313		t, df	t=1.186, df=6806
8971	16479		Std. Error of Mean	130.8	148.2
17541	22644						How big is the difference?
15248	15421						Mean of column A	14617
15817	8612						Mean of column B	14383
15049	9225						Difference between means (B - A) ± SEM	-233.6 ± 197.0
22240	8375						95% confidence interval	-619.7 to 152.5
31357	12169						R squared (eta squared)	0.0002066
10009	20839
19412	9311
18916	14113
17201	12459
14352	7275
11843	5525
11955	8174
23074	16754
13047	16741
7469	12119
6863	10971
5951	17315
22625	10849
14948	20262
11207	13403
11427	12301
10681	13373
17798	7281
26832	19556
8952	25344
18730	28344
11846	9261
9848	21249
13093	33965
6849	28807
14235	14803
11176	23303
34560	16299
22397	25670
29618	6076
22846	9797
14907	13509
35315	13713
34195	11434
9608	10399
10679	17596
13098	13343
7956	12906
12584	16883
14505	26409
18013	13998
14277	16630
14751	17287
13935	21858
14817	8536
13086	12908
20061	19219
10720	12069
31965	14230
22161	11702
8666	11818
11058	10190
25229	21725
24438	16442
24886	8465
20431	32069
20638	19433
14296	14325
19514	9074
10827	16810
7864	32651
23702	21857
20821	20896
25975	12298
21471	20440
11192	809
11742	10981
22774	13031
14584	8781
22667	8428
14077	23352
23998	21416
10158	25753
12322	18643
1799	19824
6476	14981
12890	19638
22822	16958
17589	12925
16143	13281
15784	28459
18845	18125
17698	23818
8229	9441
11782	13833
26486	22710
24313	10866
10929	11130
32566	12102
10075	10401
18164	6965
8076	18224
9315	11374
9330	7713
27670	18836
27487	20141
19863	19194
9519	27842
7809	13264
14696	11491
9094	15998
11046	7942
6950	24206
4688	34342
7854	5976
10032	5240
11408	7395
5074	4031
7248	10755
8029	7338
6966	7934
4487	10212
9495	12845
7689	13331
16763	10848
17915	13346
18031	6678
14615	14123
11807	6461
24674	21142
30737	18472
8522	27759
19475	10972
13816	8286
16798	13545
13163	9830
11295	21176
9458	16588
12095	9155
13528	21851
11664	24611
13389	16736
17141	10493
5314	17886
10266	16515
8684	5699
16104	17334
9336	16001
9681	6172
16165	12409
20382	9284
20333	7814
12073	4838
6651	10749
7429	12815
4866	15734
7589	4783
18151	11820
5898	7305
15360	15905
22663	20058
18625	17961
5581	5799
15294	4271
17715	3430
4124	7943
6148	14611
18824	20612
8257	8783
15415	9391
13836	22193
11325	15699
6071	10956
7180	8107
8920	18868
6965	13666
5218	23284
12651	18931
11703	18061
15382	10225
11473	14200
7248	10424
14647	13097
17477	10762
11427	12901
11706	4689
24059	8584
19158	7304
14757	8170
3839	9119
1853	6491
3450	4359
12910	5136
15492	4672
6129	6582
21658	5905
5588	12750
5709	5226
4537	6919
6241	4700
6626	9278
7352	3229
18540	8403
15908	10742
9029	13175
15528	4367
2977	6223
4053	16906
7888	13758
8956	6496
11186	9697
13477	12282
20978	7102
12148	20890
5815	6618
4278	6581
15005	11848
16282	6508
7082	2085
14736	4999
5417	8433
21231	2783
8985	20203
7430	10642
13357	5383
8585	4036
7247	2324
21509	1645
14703	13334
6393	2898
7724	9570
11568	3713
5729	23125
17180	11112
13130	4677
8080	1996
12139	3832
13957	7069
13916	20622
6593	13684
13284	8157
8674	11991
6974	14080
34323	4192
11741	13651
11183	6464
21197	4472
9021	15231
16894	17794
11936	925
17441	5393
18054	6608
11439	5008
12438	8650
12411	14715
5083	14847
9531	9615
15504	15061
10420	12563
14242	6535
16958	6862
13911	16095
16484	14952
4818	39026
16162	12445
16922	14228
15246	15343
13112	24467
20225	6604
14002	18525
19234	6548
16948	10502
4923	10075
18298	7590
23437	8956
12835	4505
8436	37483
9246	26679
33994	8883
7840	12820
22518	14430
21437	16155
5376	7392
10482	10813
12554	15207
13488	6130
12349	9949
29812	8449
50454	11159
6268	6124
7516	7563
11133	13406
9840	5587
14463	8026
14080	16197
31890	10984
9839	8480
7134	4779
9869	5649
6026	9733
7336	20352
12407	7625
4912	9703
3767	20983
4271	9285
4963	12614
7875	17072
4429	5635
11147	6970
9124	39476
13723	4101
4869	10506
11394	9874
13064	12464
14857	8824
14928	10706
837	9028
6977	10455
8759	16839
15993	8988
13526	6021
20282	11623
9068	15846
13098	20173
8054	8381
5805	23870
10678	17704
9595	16760
4991	5505
8064	12900
2817	33892
7243	24410
5405	19674
4929	21154
12808	9801
5027	20480
6945	23599
5428	18366
3440	19285
6688	7859
7454	9883
7310	17545
6831	12353
5242	5439
6650	8438
15450	18830
11067	12855
4966	13020
11837	12755
9217	10897
5858	11306
1549	13124
14547	2616
15601	13934
8107	9008
19755	11614
12102	11855
9945	10270
13115	10581
18607	11992
13539	14245
	9250
32059	12065
6921	6656
5135	12890
5138	14946
21788	5960
16424	7422
11574	15813
16372	12923
23983	4714
23746	9263
13097	8729
14478	10056
9898	14104
16260	5839
13181	5588
16640	14868
10442	12656
6502	7779
7897	11473
24955	10611
23712	15626
34373	14485
21633	7345
6754	18535
7570	8154
10966	2732
7546	3883
11569	4105
10358	14207
15593	5568
15976	7965
16741	12652
8787	9396
17922
11852	7523
9666	10053
10526	9970
12438	5136
12070	8868
15578	7979
20056	18503
15178	29390
10952	11632
18653	17510
8028	8931
13347	41008
9201	3636
18216	22682
19603	20871
11645	6513
11408	7612
13502	10084
23542	12448
15576	4817
8037	20260
8600	14283
12296	18758
9891	29903
34397	28467
5144	10962
6629	10408
13305	31504
13682	14372
13261	9667
24922	8921
6836	29424
8892	1619
12577	15786
10507	22848
5942	9893
4126	11967
10742	8909
8549	5318
14358	10598
1411	9599
21275	16705
5664	11279
6147	15037
22482	16094
4289	6833
2898	11222
25318	13742
18569	15931
12004	16641
10962	13224
25155	10163
15820	18798
7374	19247
22359	19455
11916	11250
8075	7998
5271	8814
13619	11739
12207	14052
12945	10558
10638	11074
6941	4889
8109	11461
7387	11918
3606	9215
17136	8486
10208	5635
39432	11417
12025	15374
11506	5073
8655	9946
15722	10333
18292	28144
8970	27366
26444	28513
11621	11386
15808	10294
10607	10080
9633	9393
10463	8387
19839	9251
10982	51856
14262	14383
15311	20763
14021	13420
5181	20156
13256	13071
13989	4341
15953	21700
22191	12890
12684	17147
35367	14810
4829	22081
34320	30859
13631	18621
22037	3392
7622	9611
12030	14074
14551	13831
18098	12187
6203	10111
12659	24200
27735	35575
7812	26655
14228	16276
13320	19446
16807	12786
19388	17774
8298	16452
12523	7503
5155	18575
16361	15769
11274	30548
13484	11215
23121	14651
5720	8342
11314	13669
14723	15450
4982	11149
8920	17345
21457	7696
7944	11358
7375	16912
11068	5350
10677	24827
18198	21549
14094	11646
38070	18556
6212	15697
4230	8091
4968	14479
31546	15885
5878	9327
11169	11419
8435	22041
8001	13127
10939	17508
10984	9790
12953	17883
11567	15610
5761	7311
11535	17008
22650	10517
8501	13869
6990	9443
15025	11563
32534	10495
10037	16535
10331	11610
33257	22192
17878	16316
4909	20615
7010	7803
19238	37800
12058	12712
20954	26240
17642	9138
25771	7884
11379	10225
26534	16907
12763	4075
18086	4576
12538	9550
15893	2040
20236	12643
20057	11256
3767	21480
22250	13517
22254	39542
39534	22772
23146	10598
9906	15672
13758	7275
19798	12394
18209	12987
20590	23598
17392	20358
44390	10995
17331	9157
11806	9563
8822	4981
1858	7381
4126	11052
16900	22885
7009	17742
21029	17657
24873	13449
25217	13510
18255	10857
14771	25793
9967	26192
18447	6188
14427	21152
14289	4204
22207	22117
13988	14147
18955	18800
15284	27777
24282	9885
7467	3080
11351	11954
10105	8756
15264	6563
12483	8159
16919	5041
9437	10096
7377	6975
13691	4223
13210	4870
19849	4307
12462	9380
19009	13654
13148	13925
8907	15556
20817	6830
11138	5496
12091	15797
10115	24650
19920	9285
10762	25018
26812	13906
6866	12509
28204	9008
20911	41354
17119	9729
11790	9697
18290	10769
28754	9401
30400	11022
35110	27102
26920	22787
20234	25152
22738	4375
32291	13796
21137	19976
1857	11208
19308	13561
19604	17857
27213	3866
12639	5429
9377	12467
9862	8681
14740	8424
5212	14533
15445	17316
9052	12086
21920	15606
21414	14278
15760	10703
8978	3022
18896	1966
9558	22945
16424	9921
9193	15241
8565	14257
10108	28341
17226	7844
17782	21028
15630	6963
16489	12617
11972	21662
9161	15620
23021	15001
8677	34505
14828	33399
16112	7707
9013	9271
8611	31916
30938	36268
24023	8639
18632	6199
31735	13709
21595	23289
20307	8767
9206	10050
19766	10011
17731	11996
14434	9017
17610	20846
16822	16778
25329	24503
13823	25198
23986	10514
5371	30406
8856	31714
4147	18582
8559	10393
21920	12312
18231	17614
30415	10030
9363	8404
7870	6476
7036	4175
9176	9539
13181	12799
12323	4041
20597	20465
9726	13684
10215	7831
7730	19046
8569	4473
16153	18167
9691	7631
6850	14787
1809	5753
17275	8447
14624	10753
24627	10564
24494	17184
10012	2744
11745	2789
20595	9514
17499	4189
17170	8357
21835	11574
15546	16408
12288	5019
8506	30691
13246	10791
7956	8679
8424	17866
5120	29387
18203	6432
11916	13350
6520	6385
8299	16314
4382	349
14114	3075
8143	21694
16179	12494
10914	8861
7434	12731
10202	6115
10571	21360
5485	8356
15211	23671
14970	7196
5962	8023
13551	10077
19935	20240
9449	13806
12198	15390
5901	23586
5654	8698
8107	24328
7133	5501
8220	13655
16207	13135
8396	359
15584	2824
2433	30798
2979	27505
7773	8838
11941	21475
8837	19096
8569	3322
6046	6278
2623	10742
2338	14830
2784	20022
12383	24587
	4912
8184	14036
11022	15120
17772	30117
8365	11992
13752	17906
17476	20052
15663	8803
12321	11181
14132	17321
7970	17641
27685	15772
5550	7913
30661	8692
11280	11532
7390	7321
8792	8045
7175	26444
8694	20663
8389	13905
12352	12084
15407	14957
19078	15737
7328	13764
6595	17220
10547	34738
11457	14385
10205	17189
24691	21338
7243	10057
26038	16626
13558	8517
15699	12552
5229	25974
4241	10786
17556	28071
7831	12170
9008	16182
24054	23433
7311	18066
10885	41743
10767	18735
14916	9918
7064	22823
7528	13540
13559	21606
17021	14104
11772	18748
5263	13646
13140	16464
7145	27171
11530
13132	22416
9658	7139
3687	6554
9983	11808
6080	31148
12304	19681
10634	19814
13635	8172
6179	19912
10408	5073
8378	12967
8299	31265
3469	16592
11640	13049
5699	6762
20546	14516
10619	29623
5109	16548
9658	7593
5041	31072
6340	31360
11151	28404
24890	13852
15726	16321
8400	15633
11538	16679
8023	7950
23985	5790
22700	12106
7926	37339
13596	17277
17308	17834
16530	9414
15862	14113
6243	19784
6962	27287
9213	23843
17379	41107
10907	27899
11255	16097
6190	14085
14439	12228
6770	22937
10483	22530
12337	6110
9521	10687
12321	13536
6783	19223
12094	26460
6206	11926
7729	20999
12777	37218
8947	15762
13072	7563
4986	28540
22922	27008
24597	35130
13649	13950
8297	9584
20053	6277
11906	12699
7686	15428
19518	13251
8693	18799
4728	19941
12261	7022
5464	12825
18789	14916
16552	13219
8958	11081
11358	6522
18216	14940
9855	4519
6602	3620
30576	9553
11320	7972
2921	12434
3027	13013
8022	7851
6269	8723
4740	12667
3455	24748
5505	18944
5730	7049
8147	4638
18000	5830
15242	5126
14757	15296
4745	12348
8699	10238
9922	14186
16403	7663
17359	6027
10966	10620
10572	26337
5983	15472
6656	5359
10161	14119
7921	9367
6731	14210
4008	30179
3754	17568
4703	17256
11520	10592
8235	8062
8689	17375
11596	7474
9519	13391
8347	1083
11791	20167
28383	4906
17953	5022
12308	6466
20991	12166
12617	9840
15359	3355
8223	11768
8101	10371
7646	6658
8328	24819
10143	27498
8430	19482
16472	7065
13083	12559
13352	14585
9715	4423
4605	6061
11614	6081
9512	20372
5248	7583
12058	4056
2709	10789
17002	7646
6505	17034
12194	11784
8719	8578
6409	7273
11626	16344
11007	5366
5793	6044
7184	17478
7519	5187
3406	10160
11084	6768
6505	19606
16524	3335
16880	9435
15592	11570
6758	3097
7624	17502
4988	12493
8691	4134
12553	22818
2762	6324
9288	10378
10706	7462
7691	6926
6995	4757
15563	1678
8688	3919
8283	4989
6275	10300
10876	7305
10626	10773
2235	4256
11231	7805
5709	6172
7130	4104
6514	3174
7637	1833
3570	12782
14200	38991
11629	10972
7524	5306
12639	12022
10730	20708
8472	9331
6905	10947
8850	14580
10185	19591
7511	1568
11046	3906
6515	24385
24001	4925
13962	25412
13469	15740
6584	7818
15365	7125
13784	14283
23797	17216
11260	7993
11139	10993
4984	9505
12018	19314
14927	4176
9657	11237
24481	24229
9568	24710
5158	11234
10740	11064
6453	14387
18721	4327
6494	4581
14581	5532
6383	3351
21709	29345
19555	14170
6869	16338
17387	10257
14251	9417
7127	6851
7519	14131
11445	12472
8759	8679
12184	12013
9568	1690
7991	12346
38868	21463
15690	12291
14059	11706
8251	22798
5609	10385
13161	11813
12333	5081
17684	16077
10780	15306
1558	4541
5098	10458
6555	17595
6442	17960
19152	14670
29704	13631
15621	15363
25978	16016
30021	23301
7001	25105
13625	15160
13887	13036
8525	10494
4785	13004
20883	23275
22253	13018
24730	11053
4783	26167
14108	18241
8200	6995
14115	15727
4925	20367
7363	8316
6770	8121
16069	18193
21432	23588
30601	8576
4756	19836
25833	16374
9664	15600
14559	14889
11494	38472
11430	8611
9415	13349
6103	10236
8380	8136
6376	11850
4047	9790
11823	27821
12173	12736
14518	8556
9874	17567
4152	16180
29049	27277
11648	14626
10103	29277
34132	4868
7278	9307
7373	20023
5688	6529
18610	11247
5967	9837
11338	15367
9241	10596
12771	18983
7865	16696
5980	13772
7303	19720
5946	37077
4691	10954
5629	12774
6151	6890
459
5978	6570
11315	12845
15396	11096
15505	7515
12537	20891
9529	13232
18026	39578
18082	22668
6495	9491
4824	11543
9994	8833
6971	30883
9019	12194
7628	7470
14814	12795
15309	16710
11387	21498
8783	7517
3566	17785
1103	20286
14675	11625
5630	13941
2071	22291
3820	24224
2762	14919
17387	14285
7082	18282
5900	7875
4814	6284
6854	48938
3956	12164
6639	17412
3674	24895
2906	16176
3440	11277
7765	29649
4136	25865
3595	16528
4026	19728
12781	16130
5087	3213
8752	15317
8319	12196
10463	19678
21513	27070
6352	28225
18744	33723
5595	18742
18204	17483
20647	9718
13300	16573
13468	30344
5661	22315
4265	20175
11984	10873
5720	20235
9051	16017
6976	10700
5708	34366
20825	27049
29364	22701
17247	20328
15445	13462
12020	9966
11385	26877
9845	31218
12260	13698
15840	12337
8385	10776
12965	17420
12514	18324
18111	21148
27249	19928
14579	13768
14801	14923
23348	15108
12308	12044
9157	18459
11794	13234
14615	19027
13338	31729
20036	10399
17167	7581
12048	13522
4649	9496
7909	11282
17680	12054
31633	18045
22507	20801
21449	14778
15105	9692
11542	17896
19157	18929
12192	16526
15129	20573
15938	8685
8028	11148
20835	14658
15805	7683
5692	13032
17295	10571
14261	9420
8649	12659
20670	1101
26868	-415
12415	16591
9017	16763
15772	13752
10464	35992
11507	11805
8931	8602
12455	10823
30708	9747
37177	17815
17103	8788
15489	9079
12780	11122
24690	17271
6611	14870
21808	11289
14357	12469
26920	6733
41883	16254
12872	21560
13493	14421
23448	6128
14335	5187
7621	7988
28688	7560
18942	8093
6767	14216
	19364
32696	8204
40196	17797
43240	7058
41455	2768
30771	3693
34650	3936
17744	6392
23609	3694
50763	13382
25811	6593
38267	13538
39926	8915
37002	6441
34267	7662
12039	12593
12204	5387
22081	1710
14591	11127
24208	11323
16988	11659
16229	9155
17490	6673
22015	18127
14399	3062
6100	14571
17222	5299
20951	4826
17197	9664
10792	18276
17747	15709
17495	8197
16369	4313
8836	1147
10213	2366
12713	2932
13953	9281
15635	4922
6682	12998
10065	3388
9888	19234
6937	11471
25984	3456
27130	3184
14139	5565
14177	5497
13798	7837
13149	6929
13363	9098
9053	1049
8735	432
9803	13943
13020	20383
11878	20928
13058	13880
10139	6526
15816	24534
10988	17330
11419	12241
7847	9877
11484	14546
10736	12318
10555	23098
19136	16093
17747	13156
18290	12213
14808	6617
9254	11673
31344	31128
36414	15906
32903	19275
6829	18951
55610	10289
40249	12264
51170	18393
55573	2641
26552	6848
27594	11613
46173	24542
29652	20595
19090	4741
18294	16936
23795	10435
6278	11604
2253	30682
13829	4739
7587	5035
16733	8332
12994	10866
15300	14848
21843	3448
20552	14548
17342	11188
20153	12964
31339	10785
23279	10224
20634	11071
31590	6287
17909	14460
9505	7918
12639	3124
20702	14352
17889	4072
15328	8809
7097	12747
21000	2375
15161	12306
11105	7205
25697	10833
24748	6127
20304	8700
23518	7792
14925	3595
14761	2151
10226	15014
3385	22043
13669	615
18593	3042
27693	4865
11949	8439
24073	10779
27595	16592
27010	3958
3795	320
16663	-540
14783	7943
17987	9758
27031	4627
19438	6469
3956	15161
21042	7709
13645	8771
14459	3646
20850	12130
15596	15022
16988	10005
18645
21743	15940
10047	5008
27625	17497
14198	29985
18478	6607
13038	10341
27583	19337
8215	10166
23407	22961
25443	15794
4634	12516
12477	14994
17116	17302
15992	13581
28380	15622
14425	13666
28326	23590
14695	14516
6916	11714
16649	13881
13578	31540
25943	18383
22322	17664
32897	11586
26992	12589
7097	19241
14367	9388
36822	10422
8682	19352
35268	4777
17442	25889
31925	20036
20036	19152
26891	19559
23991	25090
6478	15448
8318	19141
59403	23607
29923	32213
26107	29950
20631	34488
11785	24216
32411	7885
18134	19559
11672	8680
13097	20914
35588	8235
26074	25535
27129	29225
21800	32902
19783	16361
19519	29037
21129	19107
42587	6562
21797	11227
11492	35273
31896	15292
19322	11827
23801	47454
14801	20456
19710	21304
16170	31545
8185	25321
29589	57211
20032	30762
3610	20818
12022	25295
26848	11055
19340	7845
4681	25064
18198	17814
12673	30206
26428	2135
23697	21588
11936	26325
27511	13795
12377	13888
10449	7483
24248	10482
37833	19517
21640	12028
29512	18672
26827	11589
22913	12830
15973	22215
21502	16958
15302	32916
25120	11832
12452	10143
21366	14801
19090	2658
30886	3612
11442	11179
29971	23760
33085	5328
21317	7954
18337	5226
24708	30664
21448	10433
20861	2952
21508	21162
17502	14687
27277	19145
21549	8882
16859	30745
17159	20795
8985	10344
11547	13705
40995	22977
30073	25668
11041	10696
27940	29653
15115	2864
12984	5435
36915	9618
17523	22391
9336	46578
12283	11264
25703	10925
13906	18303
12750	3987
26157	16141
30472	22283
16630	6751
11085	11494
14942	38011
7986	12102
5296	12727
16320	10792
12601	13085
14133	22071
14536	21226
10521	4110
56814	2957
18625	1908
17685	17389
17756	3206
19317	18213
15237	15077
14850	38412
24601	22327
16701	27038
25694	14681
19247	8511
15939	11479
21153	3709
9797	11645
20695	2513
10188	2584
7016	205
14540	2881
11430	13484
18673	25423
20115	21031
20428	7524
20205	6343
8579	14924
21005	21462
26662	5215
30859	18738
41360	33110
12819	16395
9112	16879
24574	11464
25810	19104
10513	4649
15493	14810
24697	10246
24626	13683
6412	12549
16343	15936
16374	5954
14236	13063
13336	14068
18775	16735
15367	29202
17688	9396
25302	8926
14002	11782
8883	16743
22746	27311
7754	9375
6170	19928
18895	9973
22038	9698
3418	9804
22684	18167
8518	16203
7966	21977
14683	17848
16181	10469
23687	3196
12757	2226
14926	3273
7936	2288
27599	3469
1900	18957
26029	20963
18297	18690
13579	12351
23729	24813
9349	40919
37767	17067
22757	16501
27576	17507
22190	6656
19371	17301
13474	14964
30027	11753
19098	11178
11490	11430
17384	11141
14588	10562
15121	6552
19763	5788
5674	4481
14269	17345
16629	34759
12722	7677
7268	13543
17207	15958
17051	10738
19203	21875
17264	6759
6394	19702
17882	13595
7208	7111
8051	20246
3597	12739
14765	6383
16872	5402
12739	20457
14184	23314
23882	28140
17211	26532
17932	12314
14544	6903
23165	27100
6177	6799
22698	17616
39340
12870	23060
21428	23270
20549	8243
22038	15077
21224	13177
15815	19749
28328	15792
14597	17270
16570	6061
16809	10368
14360	14894
21224	30711
16781	23360
17606	28359
17433	16246
17237	17346
21149	23343
25478	19866
20110	17451
21563	19964
28324	28008
5813	11077
5044	13549
	24140
14321	26076
16033	10258
15551	23052
6807	17262
12277	20560
16412	22553
23483	20151
14212	30647
16442	5173
17724	8584
10862	29619
13141	7462
12425	19135
6562	17314
24937	22730
13993	14776
12134	20295
15296	12901
15765	18482
17352	6253
4449	28927
9689	22986
7556	26243
19674	23346
5482	11572
15767	42576
13093	33657
12597	14996
14418	15880
16565	5667
13794	10046
10962	24730
17091	41202
14773	13220
11756	4762
21242	15736
8521	19641
15757	11696
10754	39036
7041	33228
14045	27490
4936	20258
8026	34690
12497	6425
7783	18126
10713	21308
12605	32380
22120	24468
9358	45583
22018	20194
21849	1963
14836	7482
10394	8784
15134	14569
8896	8727
5869	8676
4554	11688
11522	17973
14712	19601
25102	12885
20948	22704
10750	26090
26475	9788
8415	18186
13496	31860
1405	27605
9837	20764
28992	25232
24012	12617
27748	23912
11308	21087
13930	5920
12034	25505
24618	392
18038	31526
15388	9050
23023	24466
24421	14658
15566	17652
15993	11484
19235	13284
13165	22520
18701	11035
19991	8223
17933	26500
18020	26900
8287	52915
11193	16079
35351	11738
17023	12647
6635	26847
33710	14512
17326	10940
19878	31682
8882	32575
9047	8648
7862	40428
9942	21648
9981	8719
21310	19869
27103	16897
10414	47053
7682	7352
31549	40203
20369	29685
22205	14908
4642	13098
16130	11953
21517	12045
16718	26535
13445	16513
10979	12439
22374	13410
22377	20408
11756	45221
20895	4415
12544	18344
15083	13762
7129	12483
16816	18036
26772	16696
17745	5213
16908	2186
12452	2018
10327	25471
5667	2028
3424	1432
10295	19069
11114	49976
2842	45288
19329	3223
6545	16685
12696	14953
17630	27823
8598	17173
7320	45026
29774	17224
14684	11710
13197	5381
14630	34484
12916	24362
6881	15072
15812	13272
12969	10168
12682	13807
13740	35707
9408	26853
16307	23570
23276	22590
7392	27119
13476	30953
22186	25768
11892	35345
23600	7167
22637	50405
10534	26024
7871	11841
18963	17986
15413	19305
18642	14510
13656	17045
22714	26808
16920	4042
23044	5163
11780	14819
19006	9913
21683	16973
8690	14079
27822	21306
17315	14725
5278	11244
3531	14770
28364	9385
15605	13904
30171	15813
18915	6276
28702	17272
25712	15537
15507	9563
9504	12244
11621	9794
20419
13041	21265
15635	26391
5323	9733
3741	6412
14544	15801
23547	14324
27397	5525
23315	12427
38415	12975
6802	19482
11232	11390
1366	13730
20884	8949
15823	9493
23910	14277
7301	18576
4680	34953
17882	21276
15216	14920
11361	10369
13997	19164
15739	18691
26834	23287
14312	13983
7374	10971
10912	12066
8169	8886
3839	14769
4474	39388
13412	3793
20381	14387
7120	15499
9181	24473
11109	24897
12915	30158
28189	19447
9947	18875
16777	12949
9121	23699
6300	20999
23623	9243
1376	5835
5531	11665
11190	13566
9786	11997
11983	11164
20343	6556
10328	31917
12655	18992
14439	31350
9023	10609
11748	20974
5594	9834
11653	13150
19953	24568
19166	24186
18250	19788
18890	12052
15330	3520
12578	9903
18531	9083
16643	23845
6655	16430
21846	10124
15870	16487
9799	12974
19802	13899
12923	12786
11518	20911
5553	11904
13128	7464
24451	15312
10408	8928
7528	8505
16091	15621
7700	16002
6950	11185
11709	21449
5679	14626
10448	9608
14075	6116
12359	7999
9326	22379
7860	26099
11658	25917
15572	9951
14963	24761
25301	21685
14443	22081
9336	5285
12883	10732
7670	28077
15678	16219
14685	27457
12809	6989
3854	4244
21690	8173
9062	17944
7663	26929
12560	18649
9481	12881
22324	32735
22869	21036
18394	4014
11907	9476
15269	40763
17228	3397
9154	9808
20036	16992
7430	8678
7584	11770
15107	22024
10811	13136
29141	21078
13027	11571
24535	42547
17593	20925
19007	4691
6924	12697
25432	28324
15379	34260
18972	15511
8257	18554
13371	34945
13066	26722
14650	16325
10295	13264
10374	20795
11264	23778
10952	10923
17612	3383
8696	7511
9501	6320
8862	23492
13395	10397
18351	24832
10986	5003
20961	40697
18192	4867
15987	8328
9884	4445
20411	5643
8070	14293
7425	11839
9034	21666
7628	20593
8531	26119
7108	7622
11286	734
8477	24463
11064	8899
11818	45547
17080	7494
18477	15346
14573	4040
17924	15296
21794	16106
28777	35481
14786	32833
9414	10213
20507	7747
19817	11073
13412	7259
15160	19621
19835	24227
17081	19046
12908	9868
13573	22854
23904	20649
7798	24504
14325	9564
8712	19759
7031	28891
15218	20377
11895	20497
27993	13049
[truncated: 1,672 more rows]

## Sheet: Figure 3E
Single AZ Cac-GFP			DESCRIPTIVE STATISTICS				T test
Control	+ Cac TdT			Control	+ Cac TdT		Table Analyzed	Cac-GFP fluorescence
7048	18247		Number of values	1613	850
27862	16953						Column B	+ Cac TdT
13164	14640		Minimum	1707	70		vs.	vs.
8983	14388		25% Percentile	8566	1986		Column A	Control
1849	14242		Median	13145	3256
12043	12540		75% Percentile	19317	5961		Unpaired t test
42985	12258		Maximum	61535	23007		P value	<0.0001
4174	11898		Range	59828	22937		P value summary	****
12939	11761						Significantly different (P < 0.05)?	Yes
8439	11222		Mean	15339	4477		One- or two-tailed P value?	Two-tailed
10437	11198		Std. Deviation	9319	3612		t, df	t=32.71, df=2461
5060	10966		Std. Error of Mean	232	123.9
2975	10623						How big is the difference?
17936	10555						Mean of column A	15339
4837	10442						Mean of column B	4477
7765	10423						Difference between means (B - A) ± SEM	-10862 ± 332.1
4262	10296						95% confidence interval	-11513 to -10211
7640	9548						R squared (eta squared)	0.303
3829	9098
11010	8889						F test to compare variances
3729	8459						F, DFn, Dfd	6.658, 1612, 849
8374	8226						P value	<0.0001
11581	7920						P value summary	****
4990	7502						Significantly different (P < 0.05)?	Yes
5418	7341
13414	7341						Data analyzed
2655	7140						Sample size, column A	1613
5053	7069						Sample size, column B	850
10182	6993
5134	6838
11030	6346
4211	6311
11197	5919
8750	5823
6013	5815
17068	5712
19753	5553
3949	5458
13805	5389
2389	5294
16181	4627
20655	4614
9444	4382
25437	4350
13541	4318
5868	3908
16816	3903
8020	3757
14855	3661
10378	3605
7809	3342
9655	3245
13673	3152
12448	3120
16157	3077
7136	2903
11265	2826
10606	2810
12752	2805
21990	2789
10310	2717
11720	2689
9366	2621
8256	2602
20901	2600
26937	2594
8198	2448
7574	2308
7981	2275
23996	2213
7760	2183
12969	1969
6530	1963
21039	1915
13006	1897
16948	1875
18599	1866
15853	1830
7195	1818
15310	1802
3155	1776
16679	1772
8481	1767
9759	1766
21424	1716
38245	1664
18765	1655
13601	1628
24564	1608
15650	1597
4139	1586
18225	1566
21358	1557
36093	1548
16134	1547
8080	1534
7148	1502
20844	1497
14726	1492
16189	1480
13086	1468
10581	1456
12750	1402
14538	1346
9652	1331
8159	1312
6854	1308
15606	1306
17056	1303
10205	1290
15267	1246
10744	1240
24173	1236
23943	1166
16476	1154
22964	1138
13597	1099
29496	1095
6220	1095
9860	1094
9043	1021
16646	998
13359	998
11211	939
20787	907
34636	906
39582	884
14689	883
5358	856
29048	839
5812	834
11957	793
31133	775
25579	714
45694	682
10632	676
26816	671
13485	666
17656	661
28229	643
15185	633
35670	596
14751	566
22406	516
40060	482
29047	471
8309	440
19324	420
12790	392
17412	315
20948	70
17298	17934
12813	15720
12536	11141
14173	10753
11507	9928
14849	9676
20463	9546
13212	9143
8567	9073
60105	9028
15602	8922
12594	8421
25096	8391
20652	8080
5931	7954
7910	7792
38460	7541
16859	7381
26893	6462
9739	5645
39353	5509
26585	5407
6350	5366
9895	5343
6762	5166
3854	4791
3511	4613
8524	4422
8427	4397
9474	4387
8075	4216
12691	4212
3870	3781
1707	3773
10331	3400
4505	3295
7924	2751
3820	2665
17608	2460
4774	2433
10839	2384
4025	2382
6147	2382
3662	2346
7615	2336
8490	2309
3488	2271
6001	2206
6288	1976
5892	1956
10017	1796
12008	1776
5761	1596
6393	1486
8252	1482
5965	1457
5647	1406
5297	1397
10984	1351
7964	1150
3862	1149
12246	1147
10319	1116
5466	1112
9252	1089
13997	1012
7520	949
2818	919
16672	906
5300	875
14825	851
3598	833
7517	736
10816	727
11486	702
12546	697
24645	695
12388	685
9151	642
9125	631
9333	336
12559	252
7952	219
6915	16727
11622	15591
30855	15244
11039	14128
17237	10219
13728	9719
20044	8999
19933	8860
13882	8706
6904	8601
12099	8483
4282	8095
7447	8001
25373	7971
13805	7947
11568	7897
35519	7886
6735	7864
9875	7859
9065	7843
10296	7761
9676	7695
12948	7583
19805	7446
27431	7302
7152	7198
18790	7128
4256	7060
12135	7035
19126	6911
10020	6703
8732	6675
10447	6548
8014	6332
29081	6323
11969	6266
14454	6239
14144	6089
9948	6052
16298	6037
2646	6036
15265	5985
5293	5914
11178	5837
10320	5600
18149	5518
3476	5469
11531	5446
8102	5145
4747	4661
15704	4184
8624	4135
6457	4034
20700	4026
5961	3961
4023	3944
12775	3941
14313	3658
13089	3495
7986	3351
13934	3314
7383	3129
12386	3047
7481	3038
19517	2949
11926	2895
15124	2772
5331	2763
9333	2717
8334	2603
5274	2577
6507	2561
6758	2506
8356	2478
9363	2281
7613	2237
23039	2143
24473	2059
19230	1982
33347	1726
6307	1708
40314	1687
9265	1613
4500	1562
11622	1537
13180	1535
17261	1534
10727	1513
34963	1464
29620	1332
10079	1328
7764	1311
27328	1255
10609	1251
11137	1185
14378	1074
18048	1048
15083	1025
13529	1010
10762	986
13109	921
20767	844
16321	836
23480	797
5818	796
16932	781
19998	588
18187	411
30380	22782
13047	18683
36022	18202
7923	15936
14480	15555
19163	15514
32824	15238
10826	15044
27999	14047
17833	13229
25053	12645
22702	12515
21874	12321
17921	12261
35920	12215
36400	11996
7826	11912
13598	11912
15506	11499
6852	11301
20433	10824
20016	10789
12607	10557
23442	10347
16219	10173
61535	10040
12209	9952
18846	9812
12528	9795
21253	9766
11317	9754
20539	9574
25375	9202
40709	8984
40228	8920
15539	8867
46662	8853
21140	8819
42456	8787
12688	8669
10059	8524
27686	8318
20189	8062
32917	7914
15290	7892
13751	7884
61535	7858
15554	7748
21519	7727
26400	7647
25480	7494
14443	7160
59028	7156
19284	7154
16597	7111
21891	7038
18280	6984
47684	6900
10187	6866
33691	6854
43010	6753
10868	6613
22237	6459
3875	6291
28774	6250
27959	6106
23522	6086
25764	6045
10982	6026
10554	5824
10788	5747
17550	5626
5229	5481
17177	5475
16164	5474
14798	5403
19272	5214
4302	5207
28264	5142
13357	5133
24135	5013
28000	4978
21479	4888
18744	4811
10759	4810
9194	4791
10222	4777
26234	4772
36971	4727
27357	4661
3948	4655
19716	4643
6567	4611
6098	4607
5768	4586
3234	4543
7529	4512
3650	4510
13931	4507
11389	4493
4997	4484
9704	4462
3749	4432
4949	4413
17238	4399
4843	4378
8921	4375
11584	4338
5398	4295
5059	4262
13704	4234
4465	4212
1810	4202
8473	4108
3740	4057
14969	4012
5961	3933
9842	3923
8301	3841
6818	3788
15884	3758
18290	3687
25771	3668
14616	3665
6847	3632
21679	3597
16307	3545
6695	3527
8413	3506
9358	3490
18789	3459
11035	3458
14899	3434
7725	3424
5307	3388
6759	3367
23125	3357
16417	3335
18604	3333
14462	3329
5457	3261
12034	3227
18196	3218
22009	3104
13295	3086
13229	3086
5591	3085
10792	3066
11168	3038
22559	3029
34068	3004
21063	2962
7970	2948
31347	2947
9069	2927
17393	2916
13088	2915
17960	2907
20502	2906
7063	2875
8746	2867
15863	2852
23231	2839
14189	2835
12385	2826
16720	2806
42940	2793
13739	2783
18292	2768
21845	2760
19286	2759
7406	2739
17137	2736
24722	2729
31299	2706
33069	2692
12225	2663
9876	2637
44220	2629
12088	2615
26436	2579
37167	2579
37415	2579
3872	2572
17123	2566
44062	2551
12250	2535
18898	2526
15794	2523
35068	2473
20661	2458
11481	2437
12431	2420
13663	2398
14735	2386
13020	2375
16261	2361
7902	2347
21601	2330
13524	2325
14106	2323
3416	2300
7611	2296
15425	2295
2631	2263
14125	2262
15682	2254
33804	2252
34134	2249
15775	2244
31320	2220
14212	2207
15527	2199
27014	2199
16813	2197
26740	2169
21274	2169
27633	2129
23280	2114
18697	2102
22474	2080
7061	2078
21696	2074
56884	2067
16607	2042
20176	2016
29219	2006
29112	1990
16430	1987
39209	1983
34117	1958
21219	1919
16987	1903
31222	1826
23127	1813
18878	1810
12029	1797
4526	1783
6897	1778
4016	1775
10815	1775
7067	1722
9298	1719
7124	1689
11333	1639
5929	1608
17283	1583
12515	1570
7008	1552
7572	1481
5525	1397
3447	1381
4596	1324
4636	1267
7209	1181
14642	1176
5859	813
14544	346
19446	23007
15216	18849
3662	17843
6867	17111
6525	16858
23972	16794
14110	15317
13002	14716
6636	14017
13397	13839
5999	13373
6280	12564
2735	12299
8130	12224
12053	10635
11841	9958
16922	9687
12096	9589
9972	9176
12817	9114
9717	9007
7140	8972
7909	8836
15660	8265
11433	8067
21428	8038
11341	7824
24364	7618
15525	7557
2885	7551
8553	7456
33779	7430
30311	7334
15418	7327
19565	7326
21867	7288
8074	7282
13774	7257
14407	7117
7001	6959
10128	6943
16692	6751
7843	6726
15379	6646
7557	6426
12641	6422
4362	6403
4418	6393
6080	6386
4004	6326
9889	5953
16276	5881
10984	5852
18577	5788
35833	5688
17414	5658
29580	5643
23517	5569
25734	5552
8475	5551
19904	5530
6909	5521
7689	5472
19522	5464
16232	5427
17594	5377
13112	5311
31133	5244
19155	5141
20703	5123
4068	5086
50488	5056
39912	5050
9550	5047
11084	5016
14405	5005
14821	4992
18256	4961
11541	4907
34524	4768
17389	4761
28980	4733
11759	4697
5315	4624
14604	4594
11042	4568
17642	4515
12024	4504
26433	4496
6274	4362
12654	4334
41505	4330
22685	4322
8764	4290
15554	4157
5675	4139
31275	4132
14895	4080
11965	4038
14044	3983
13282	3976
20983	3969
35132	3950
41984	3935
41906	3904
	3864
	3861
15822	3825
17502	3784
27157	3766
11226	3748
10894	3712
28036	3646
19967	3633
6107	3612
6661	3607
10281	3592
18518	3555
8894	3538
13036	3528
7028	3528
21998	3517
18992	3500
6230	3490
5708	3487
13356	3475
23926	3427
19338	3424
34682	3369
3831	3364
10444	3343
6234	3309
10384	3307
7154	3297
6163	3285
11661	3284
13717	3250
14956	3232
22158	3226
15795	3169
8944	3167
9706	3136
16449	3069
18496	3036
19325	3028
18163	2979
15617	2969
5844	2966
9386	2966
6313	2964
6834	2962
12430	2956
14711	2943
8494	2925
7586	2921
6588	2918
13195	2914
24521	2902
15342	2901
19770	2856
7528	2834
21106	2826
9466	2807
14725	2804
18380	2788
7360	2775
26627	2772
14425	2740
16607	2731
19287	2714
3061	2697
7617	2652
7997	2612
10989	2601
14018	2593
41066	2581
17375	2570
21635	2570
35481	2553
10209	2522
14082	2522
14552	2519
17853	2456
24971	2426
9622	2426
12127	2422
22072	2419
5331	2381
36928	2360
27001	2357
47364	2331
4390	2328
24246	2322
35582	2261
35622	2252
14686	2252
9117	2246
16486	2192
12104	2180
7888	2174
38850	2173
9583	2166
25347	2163
17444	2133
10331	2122
14679	2108
21617	2085
25694	2081
23548	2045
34477	2023
8394	2020
13563	1995
5974	1983
15667	1973
20555	1972
6418	1923
12549	1919
21237	1883
11701	1880
6026	1876
11027	1874
10085	1868
26867	1863
37305	1850
31915	1847
30793	1829
7320	1827
22476	1821
10495	1807
28537	1807
20550	1752
17794	1742
4855	1707
11305	1697
21832	1684
13647	1649
9828	1622
6781	1591
16554	1551
18503	1531
19050	1459
11510	1456
28116	1449
15770	1306
5967	1259
8225	1139
61535	1111
3221	1025
27822	992
24740	974
15144
24766
25624
22565
38968
10110
15117
14287
18746
34871
17786
21417
9814
15519
11680
12502
16100
8920
35916
32425
12536
12805
27731
15018
11781
16335
19324
21509
17579
45551
18504
23275
7576
46959
14755
5532
18540
5693
5252
7353
8397
2925
17415
2809
4003
7237
9436
3796
2297
14469
19310
14441
8868
15362
5527
9628
19490
34454
26603
15977
3624
22873
11042
5728
3020
9719
6718
7899
10487
12247
9008
33837
17124
19264
11451
32754
41024
23787
16516
26751
6739
16629
17242
20823
9600
11396
12317
10412
8681
16718
23277
18875
19611
37485
16941
7574
10203
15524
25994
29514
26279
37056
6627
9851
9025
11467
6401
11763
11066
4693
5604
13365
22772
18713
12281
17602
18451
13716
17932
13284
19366
14582
4862
7678
12762
15826
13584
23593
11662
29286
15830
12524
5854
22516
23014
7435
23955
11700
18585
14436
10765
38393
38221
24186
11355
13687
21648
45619
8206
10295
2494
22544
8040
10290
10926
9086
15307
16814
18289
7368
26189
12563
7489
15463
18573
12857
8980
8711
7904
7117
8682
10079
7443
16506
12220
4067
14028
10485
6430
6378
7305
16906
12472
11650
10757
7591
7105
10445
10552
9907
18859
14550
13168
26762
3105
17544
9987
31017
17794
21941
40541
18337
10606
23031
10763
5014
8746
13660
4504
17379
9058
10644
7307
8238
12383
9315
9174
10504
8419
7040
9484
5385
12127
9059
11461
4794
13440
25231
9529
25669
10463
17412
11923
6375
18435
6807
19050
6291
6867
11403
8059
7198
5368
9437
4676
5033
6316
10042
4091
5587
7753
7651
9426
15086
17307
8976
9506
6252
18678
10098
5668
19331
9459
13679
10240
11345
2594
5271
15321
20522
14290
11208
6522
7101
8078
11351
9960
18573
8116
13440
9067
13764
8467
8058
13045
14760
7305
16097
2097
6710
10612
6850
10950
30416
24782
4277
14374
12222
14465
3769
8405
14929
14318
10313
11975
12163
5888
4999
5299
10193
9901
20695
13866
14016
5418
2678
25830
13709
9205
8673
17861
12453
19866
18618
11122
15808
20523
6103
19580
18458
12866
14074
11482
14564
7722
11505
11252
11761
6888
12554
3797
26122
9003
12318
14155
12726
14908
17780
7601
39399
36998
18777
9892
6784
7793
18486
14569
10399
21824
16684
10034
12427
24346
16073
16771
11808
14780
16353
15977
7524
14582
31237
4810
10924
12485
11268
23885
33669
12399
13824
8823
11613
13606
11646
10637
11310
11132
17416
29031
18433
5240
9649
13186
10047
9805
28358
13152
12124
13436
12527
12207
9631
10091
20964
13650
15273
16466
32927
21092
27588
8457
23933
15081
36165
11903
23536
6482
16238
17629
20017
31664
16081
35550
15287
12784
19512
7633
9002
5553
27324
11159
25104
24182
11000
8878
9048
7672
14876
14230
10637
45263
14766
22614
16959
7997
5812
15457
10585
30489
12677
22890
17996
7357
6930
28827
6332
11896
17236
7134
10971
17748
33703
16754
14693
21124
9886
9274
21062
17658
22970
13227
7021
14119
12305
5662
12075
16203
21355
15802
19801
15398
13053
5807
23006
18969
7465
15367
15585
5943
28743
6881
19596
20906
6554
19801
7108
6890
23314
6151
11239
28057
24275
23986
15289
16029
22825
18320
44826
14696
25200
37833
22414
26710
15296
22590
28154
19144
19430
22343
9806
10379
16840
40076
31035
15648
8878
21556
32837
19847
43446
24746
18850
34830
26788
16628
32584
21845
7632
13181
12221
26997
29400
20343
7859
24340
23757
15905
28048
19670
20674
9787
15178
29696
20373
9057
12460
12710
18619
11033
11247
8564
14917
5795
7393
6890
19462
17324
15328
14583
35403
11845
21309
15303
18351
9030
32658
9341
16902
13742
36167
36777
34070
33188
10691
8966
11714
10672
15778
14271
9476
17872
13513
12261
15728
5692
17127
11989
17729
8626
12485
9820
9231
14426
21004
9822
11904
6664
12873
14985
26155
30537
7604
10673
10847
29490
5073
13211
10202
5853
20736
10564
12828
14210
11468
32492
8466
61535
16098
20077
29793
7113
15320
15154
13862
11749
24646
27248
16723
7963
10774
16552
12618
3919
7775
7603
13174
8612
9696
13466
13982
21247
6929
7200
12755
17868
24953
13517
11901
30476
15456
19234
6676
9369
8115
17047
7006
12703
7055
6568
4341
13712
10055
6827
10288
16938
10045
27704
8281
8120
6300
6205
10064
7191
6642
10446
7403
11934
4491
7270
6512
7743
11236
6787
7067
6039
15528
15116
10861
10221
24912
14186
13145
5926
6285
7894
11591
5765
11293
8507
12045
13488
31306
23325
15380
9198
12697
13174
8606
34287
25456
24636
37039
17188
11181
12371
17117
24497
9731
8218
21712
45869
6228
31411
9300
17687
31558
7825
28615
27023
20215
43493
21358
25143
10512
12658
16882
14013
21213
14017
7923
11455
10126
11142
12901
13689
11973
8466
8386
11135
13420
8400
50482
6855
7283
6167

## Sheet: Figure 3G
Evoked Peak Current			DESCRIPTIVE STATISTICS				T TEST
CTRL	Cac OE			CTRL	Cac OE		Table Analyzed	Cac OE TEVC (Peak)
13.3229	21.7009		Number of values	9	9
25.5921	28.8085						Column B	Cac OE
21.9757	30.0633		Minimum	13.32	21.7		vs.	vs.
29.5915	21.8759		25% Percentile	19.25	23.37		Column A	CTRL
29.3229	35.3854		Median	23.97	28.81
23.9653	51.425		75% Percentile	29.46	33.18		Unpaired t test
37.8245	24.8596		Maximum	37.82	51.43		P value	0.1659
21.6357	30.9671		Range	24.5	29.72		P value summary	ns
16.8594	25.9408						Significantly different (P < 0.05)?	No
			Mean	24.45	30.11		One- or two-tailed P value?	Two-tailed
			Std. Deviation	7.298	9.138		t, df	t=1.452, df=16
			Std. Error of Mean	2.433	3.046
							How big is the difference?
							Mean of column A	24.45
							Mean of column B	30.11
							Difference between means (B - A) ± SEM	5.660 ± 3.898
							95% confidence interval	-2.604 to 13.92
							R squared (eta squared)	0.1164
							F test to compare variances
							F, DFn, Dfd	1.568, 8, 8
							P value	0.5392
							P value summary	ns
							Significantly different (P < 0.05)?	No
							Data analyzed
							Sample size, column A	9
							Sample size, column B	9

## Sheet: Figure 3H
Cac Intensity (Western)			DESCRIPTIVE STATISTICS				T TEST
CacGFP	CacGFP/Df			CacGFP	CacGFP/Df
18537	11037		Number of values	11	11		Table Analyzed	Cac Western quantification
21837	12137
26537	7537		Minimum	11637	5637		Column C	CacGFP/Df
31337	13737		25% Percentile	20637	10437		vs.	vs.
35737	18537		Median	24737	12137		Column A	CacGFP
23037	20237		75% Percentile	31337	18537
24737	18637		Maximum	35737	20237		Unpaired t test
27537	5637		Range	24100	14600		P value	0.0001
34437	10437						P value summary	***
11637	14537		Mean	25092	13055		Significantly different (P < 0.05)?	Yes
20637	11137		Std. Deviation	7117	4652		One- or two-tailed P value?	Two-tailed
			Std. Error of Mean	2146	1403		t, df	t=4.695, df=20
							How big is the difference?
							Mean of column A	25092
							Mean of column C	13055
							Difference between means (C - A) ± SEM	-12036 ± 2564
							95% confidence interval	-17384 to -6689
							R squared (eta squared)	0.5243
							F test to compare variances
							F, DFn, Dfd	2.341, 10, 10
							P value	0.196
							P value summary	ns
							Significantly different (P < 0.05)?	No
							Data analyzed
							Sample size, column A	11
							Sample size, column C	11

## Sheet: Figure 3I
SYX1 Intensity (Western)			DESCRIPTIVE STATISTICS				T TEST
CacGFP	CacGFP/Df			CacGFP	CacGFP/Df
182000	230000		Number of values	10	9		Table Analyzed	Cac loading control quantification
187000	194000
			Minimum	182000	171000		Column C	CacGFP/Df
234000	244000		25% Percentile	186000	189500		vs.	vs.
271000	230000		Median	224500	221000		Column A	CacGFP
216000	185000		75% Percentile	249250	237000
233000	244000		Maximum	285000	244000		Unpaired t test
285000			Range	103000	73000		P value	0.4978
216000	171000						P value summary	ns
183000	215000		Mean	224900	214889		Significantly different (P < 0.05)?	No
242000	221000		Std. Deviation	35542	26089		One- or two-tailed P value?	Two-tailed
			Std. Error of Mean	11239	8696		t, df	t=0.6928, df=17
							How big is the difference?
							Mean of column A	224900
							Mean of column C	214889
							Difference between means (C - A) ± SEM	-10011 ± 14450
							95% confidence interval	-40498 to 20475
							R squared (eta squared)	0.02746
							F test to compare variances
							F, DFn, Dfd	1.856, 9, 8
							P value	0.3961
							P value summary	ns
							Significantly different (P < 0.05)?	No
							Data analyzed
							Sample size, column A	10
							Sample size, column C	9

## Sheet: Figure 3K
Avg. AZ Cac (Ib)			DESCRIPTIVE STATISTICS				T TEST
CacGFP	CacGFP/Df			CacGFP	CacGFP/Df		Table Analyzed	control vs het 1b
14709	12816		Number of values	19	20
16628	14194						Column B	CacGFP/Df
14571	13773		Minimum	11831	10282		vs.	vs.
14466	15320		25% Percentile	13768	12632		Column A	CacGFP
16362	15156		Median	14824	13885
14198	11715		75% Percentile	16362	14978		Unpaired t test
16020	12774		Maximum	19370	16160		P value	0.0186
	10727		Range	7539	5878		P value summary	*
12250	13435						Significantly different (P < 0.05)?	Yes
11831	12584		Mean	15105	13617		One- or two-tailed P value?	Two-tailed
18417	11707		Std. Deviation	2120	1636		t, df	t=2.461, df=37
14904	14445		Std. Error of Mean	486.3	365.9
19370	15734						How big is the difference?
12362	13997						Mean of column A	15105
12433	15526						Mean of column B	13617
14824	13675						Difference between means (B - A) ± SEM	-1488 ± 604.5
13768	14287						95% confidence interval	-2713 to -262.9
	16160						R squared (eta squared)	0.1407
17950	14041
15587	10282						F test to compare variances
16349							F, DFn, Dfd	1.678, 18, 19
							P value	0.2718
							P value summary	ns
							Significantly different (P < 0.05)?	No
							Data analyzed
							Sample size, column A	19
							Sample size, column B	20

## Sheet: Figure 3M
AZ Number (Ib)			DESCRIPTIVE STATISTICS				T TEST
CacGFP	CacGFP/Df			CacGFP	CacGFP/Df		Table Analyzed	AZ number
223	253		Number of values	21	21
188	288						Column B	CacGFP/Df
214	186		Minimum	86	162		vs.	vs.
199	246		25% Percentile	185	228.5		Column A	CacGFP
211	227		Median	214	250
86	319		75% Percentile	326.5	304.5		Unpaired t test
182	230		Maximum	379	331		P value	0.3971
227	331		Range	293	169		P value summary	ns
235	289						Significantly different (P < 0.05)?	No
213	300		Mean	243.4	260.3		One- or two-tailed P value?	Two-tailed
379	249		Std. Deviation	78.15	45.66		t, df	t=0.8559, df=40
348	309		Std. Error of Mean	17.05	9.963
362	318						How big is the difference?
337	162						Mean of column A	243.4
316	222						Mean of column B	260.3
300	239						Difference between means (B - A) ± SEM	16.90 ± 19.75
346	222						95% confidence interval	-23.01 to 56.82
182	263						R squared (eta squared)	0.01799
209	247
173	316						F test to compare variances
181	250						F, DFn, Dfd	2.930, 20, 20
							P value	0.0203
							P value summary	*
							Significantly different (P < 0.05)?	Yes
							Data analyzed
							Sample size, column A	21
							Sample size, column B	21

## Sheet: Figure 3N
Avg. AZ Cac (Is)			DESCRIPTIVE STATISTICS				T TEST
CacGFP	CacGFP/Df			CacGFP	CacGFP/Df		Table Analyzed	control vs het 1s
14958.2	7268.64		Number of values	11	12
11171.5	9871.44						Column B	CacGFP/Df
15400	12789.4		Minimum	11171	7269		vs.	vs.
14630.8	11776.8		25% Percentile	12271	8589		Column A	CacGFP
12270.6	9405.42		Median	14958	9953
11577.8	14277.9		75% Percentile	16892	11695		Unpaired t test
16891.8	11447.9		Maximum	18160	14278		P value	0.0001
17780.3	10711.3		Range	6989	7009		P value summary	***
12317.5	8565.62						Significantly different (P < 0.05)?	Yes
18160.2	10034		Mean	14621	10219		One- or two-tailed P value?	Two-tailed
15667.1	8660.09		Std. Deviation	2479	2082		t, df	t=4.625, df=21
	7824.57		Std. Error of Mean	747.5	601
							How big is the difference?
							Mean of column A	14621
							Mean of column B	10219
							Difference between means (B - A) ± SEM	-4401 ± 951.6
							95% confidence interval	-6380 to -2422
							R squared (eta squared)	0.5046
							F test to compare variances
							F, DFn, Dfd	1.418, 10, 11
							P value	0.574
							P value summary	ns
							Significantly different (P < 0.05)?	No
							Data analyzed
							Sample size, column A	11
							Sample size, column B	12

## Sheet: Figure 3P
Evoked Peak Current			DESCRIPTIVE STATISTICS				T TEST
Control	CacGFP/Df			Control	CacGFP/Df		Table Analyzed	TEVC Cac het
25.8706	11.8073		Number of values	9	8
26.9413	14.8377						Column B	CacGFP/Df
44.5253	9.61325		Minimum	25.87	9.613		vs.	vs.
47.0845	18.1998		25% Percentile	32.83	11.3		Column A	Control
38.7249	11.1247		Median	42.39	16.52
42.1214	21.7419		75% Percentile	45.86	22.34		Unpaired t test
42.3872	22.5347		Maximum	65.38	23.77		P value	<0.0001
44.6359	23.7663		Range	39.51	14.15		P value summary	****
65.3805							Significantly different (P < 0.05)?	Yes
			Mean	41.96	16.7		One- or two-tailed P value?	Two-tailed
			Std. Deviation	11.64	5.611		t, df	t=5.576, df=15
			Std. Error of Mean	3.879	1.984
							How big is the difference?
							Mean of column A	41.96
							Mean of column B	16.7
							Difference between means (B - A) ± SEM	-25.26 ± 4.531
							95% confidence interval	-34.92 to -15.60
							R squared (eta squared)	0.6745
							F test to compare variances
							F, DFn, Dfd	4.303, 8, 7
							P value	0.07
							P value summary	ns
							Significantly different (P < 0.05)?	No
							Data analyzed
							Sample size, column A	9
							Sample size, column B	8
