# Supplementary material for: Regulation of presynaptic Ca2+ channel abundance at active zones through a balance of delivery and turnover
Source: eLife. 2022 Jul 14;11:e78648. doi: 10.7554/eLife.78648 (PMC9352347; doi:10.7554/eLife.78648)
Supplement: Figure 4—figure supplement 1—source data 1. [file elife-78648-fig4-figsupp1-data1.xlsx]

## Sheet: Figure 4S1B
Single AZ BRP abundance			Descriptive Statistics
Control BRP	RNAi BRP			Control BRP	RNAi BRP
63535	23530		Number of values	3037	2363
63535	21685
63535	18924		Minimum	730	83
63535	18800		25% Percentile	14270	798
63535	18690		Median	21414	1260
63535	18390		75% Percentile	30947	4044
63535	18253		Maximum	63535	23530
63535	17692		Range	62805	23447
63535	17028
63535	17010		Mean	23623	2742
63535	16826		Std. Deviation	12679	2978
63535	16611		Std. Error of Mean	230.1	61.27
63535	16330
63535	16324
63535	15809
63535	14643
63535	14442
63535	14426
63535	14338
63535	13811
63535	13549
63535	13468
63535	13375
63535	13373
63535	13333
63535	13194
63535	13110
63535	12998
63535	12944
63535	12877
63535	12781
63535	12752
63535	12711
63535	12516
63535	12493
63535	12209
63535	12172
63284	12146
63140	12076
63112	12039
62770	11787
62029	11694
61421	11440
61134	11428
60952	11401
60897	11315
60804	11294
60798	11232
60734	11148
60585	10907
60372	10879
60101	10873
59789	10865
59642	10815
59588	10785
59539	10702
59135	10595
59094	10438
59041	10420
59039	10407
58976	10405
58896	10404
58327	10399
58297	10283
58147	10269
58003	10267
57673	10266
57304	10152
57083	10137
56883	10107
56598	10096
56549	10057
56549	10053
56385	9974
56182	9942
56155	9918
55746	9835
55617	9825
55426	9793
55361	9774
54908	9673
54707	9554
54701	9514
54463	9495
54428	9451
54379	9430
54210	9410
53934	9343
53898	9341
53897	9313
53748	9308
53286	9240
53235	9215
53183	9194
53142	9188
52941	9161
52930	9153
52921	9140
52911	9059
52738	9027
52681	8982
52605	8952
52497	8939
52410	8850
52392	8821
52349	8817
52095	8816
52027	8796
51783	8777
51727	8771
51558	8765
51389	8749
51197	8743
51167	8715
51165	8711
51160	8659
50987	8653
50967	8639
50890	8631
50583	8628
50303	8599
50269	8596
50034	8592
49898	8589
49797	8573
49663	8571
49592	8563
49561	8544
49507	8523
49431	8521
49302	8480
49241	8475
49174	8474
49129	8464
48890	8444
48859	8435
48659	8393
48627	8358
48516	8328
48426	8324
48426	8288
48418	8280
48368	8279
48330	8268
48278	8258
48275	8254
48144	8252
48135	8244
48027	8235
47983	8155
47923	8148
47908	8145
47800	8117
47762	8089
47686	8055
47648	8034
47621	7985
47603	7969
47546	7949
47529	7929
47403	7926
47365	7913
47215	7901
47184	7884
47101	7883
47089	7880
47046	7831
46957	7801
46937	7801
46912	7800
46816	7773
46707	7764
46688	7754
46683	7746
46637	7726
46596	7714
46539	7712
46523	7712
46465	7710
46452	7710
46422	7694
46309	7681
46297	7650
46202	7629
46053	7627
46033	7623
45963	7612
45948	7607
45943	7601
45928	7583
45888	7581
45825	7568
45760	7553
45729	7544
45690	7516
45684	7496
45620	7477
45601	7456
45561	7420
45556	7417
45546	7373
45518	7369
45460	7359
45409	7341
45373	7314
45311	7303
45243	7302
45192	7292
45134	7292
45107	7291
45086	7261
45076	7260
44969	7244
44947	7234
44942	7214
44869	7201
44697	7198
44642	7192
44575	7189
44513	7176
44393	7175
44343	7139
44324	7126
44305	7104
44280	7084
44229	7079
44187	7078
44168	7071
44056	7055
44042	7034
43999	7011
43993	7009
43978	7002
43870	6986
43845	6966
43657	6949
43625	6940
43600	6939
43559	6938
43448	6926
43446	6905
43280	6898
43233	6876
43203	6875
43165	6856
43152	6855
43130	6848
43090	6838
42977	6826
42919	6819
42877	6758
42859	6749
42855	6735
42829	6720
42737	6701
42735	6693
42682	6693
42613	6667
42608	6661
42536	6648
42500	6646
42472	6640
42442	6639
42243	6618
42151	6603
42088	6601
42057	6590
41833	6581
41792	6565
41744	6559
41726	6552
41715	6546
41694	6483
41622	6466
41545	6462
41464	6455
41442	6439
41366	6438
41316	6438
41300	6415
41278	6400
41267	6399
41117	6397
41114	6394
41065	6392
41060	6382
41044	6376
41006	6356
40978	6353
40956	6339
40932	6337
40917	6324
40813	6315
40811	6295
40780	6292
40780	6287
40732	6282
40720	6281
40717	6263
40700	6260
40692	6259
40588	6252
40539	6247
40534	6245
40525	6244
40516	6243
40515	6223
40512	6212
40510	6199
40483	6197
40481	6196
40475	6194
40474	6180
40473	6172
40459	6172
40334	6125
40267	6121
40262	6119
40221	6116
40136	6103
40130	6098
40117	6091
40020	6090
39994	6089
39984	6062
39927	6059
39885	6020
39811	5998
39736	5997
39692	5975
39642	5968
39592	5943
39569	5915
39516	5914
39512	5912
39509	5902
39458	5901
39416	5891
39402	5887
39338	5876
39244	5870
39224	5867
39203	5867
39199	5861
39171	5844
39169	5820
39131	5817
39120	5784
39120	5779
39116	5766
39032	5765
39000	5748
38967	5713
38962	5712
38942	5711
38912	5708
38899	5693
38892	5666
38860	5658
38807	5655
38796	5652
38771	5651
38755	5640
38715	5634
38706	5619
38705	5613
38694	5609
38672	5606
38615	5605
38572	5591
38556	5585
38549	5569
38528	5548
38460	5522
38449	5514
38418	5506
38414	5500
38379	5495
38363	5474
38349	5451
38342	5445
38320	5444
38309	5438
38255	5424
38252	5419
38232	5419
38228	5411
38195	5410
38108	5410
38084	5401
38056	5400
38053	5395
38032	5394
38026	5369
37949	5359
37902	5346
37902	5336
37841	5317
37817	5295
37747	5292
37723	5284
37719	5279
37717	5264
37682	5262
37675	5260
37675	5258
37637	5251
37635	5234
37600	5231
37583	5231
37581	5214
37556	5213
37533	5210
37489	5190
37443	5176
37440	5170
37414	5168
37406	5157
37374	5156
37346	5147
37300	5135
37283	5133
37263	5112
37255	5112
37221	5109
37204	5096
37170	5090
37126	5090
37118	5049
37094	5042
37089	5024
37072	5020
37062	5019
37057	5018
37022	5017
36995	5015
36989	5003
36978	4996
36965	4992
36813	4988
36803	4986
36792	4983
36779	4948
36755	4946
36701	4930
36701	4927
36662	4918
36528	4915
36512	4914
36491	4905
36451	4905
36450	4904
36415	4894
36414	4894
36398	4872
36376	4861
36363	4856
36347	4855
36308	4855
36303	4850
36300	4835
36292	4823
36280	4816
36265	4815
36221	4801
36195	4787
36123	4781
36103	4773
36096	4771
36057	4771
36040	4767
36006	4767
35998	4765
35996	4745
35965	4727
35949	4726
35927	4713
35926	4711
35926	4706
35925	4698
35912	4698
35890	4696
35880	4694
35878	4691
35870	4691
35849	4684
35830	4675
35809	4671
35806	4637
35799	4625
35794	4618
35789	4614
35775	4613
35741	4610
35731	4607
35697	4606
35670	4570
35660	4570
35645	4567
35601	4561
35560	4556
35530	4550
35525	4536
35489	4521
35487	4520
35458	4518
35451	4514
35434	4507
35428	4504
35420	4492
35415	4485
35393	4483
35384	4482
35379	4476
35239	4474
35219	4472
35173	4472
35169	4452
35142	4451
35114	4449
35100	4444
35091	4440
35084	4428
35069	4425
35058	4424
35031	4416
35021	4401
35010	4394
34985	4381
34955	4376
34947	4372
34925	4364
34886	4363
34868	4348
34834	4347
34822	4341
34773	4336
34754	4321
34724	4319
34724	4316
34713	4314
34712	4313
34640	4308
34637	4308
34596	4305
34585	4298
34581	4298
34556	4293
34550	4285
34547	4276
34546	4260
34428	4253
34403	4249
34351	4249
34338	4230
34325	4229
34324	4228
34310	4228
34293	4227
34280	4225
34216	4215
34208	4194
34205	4180
34149	4173
34111	4172
34106	4171
34095	4156
34083	4155
34079	4152
34058	4146
34050	4145
34025	4145
33985	4142
33968	4127
33963	4125
33949	4119
33943	4111
33934	4104
33917	4104
33915	4097
33915	4096
33892	4096
33875	4070
33843	4066
33810	4062
33792	4060
33763	4059
33740	4055
33717	4053
33714	4051
33702	4044
33674	4040
33662	4035
33639	4011
33624	4009
33618	4006
33598	4004
33586	4003
33583	4000
33508	3994
33504	3990
33432	3988
33422	3950
33421	3947
33409	3939
33278	3932
33275	3929
33264	3929
33258	3925
33248	3917
33220	3916
33219	3915
33195	3901
33173	3899
33149	3893
33128	3891
33097	3884
33052	3855
33040	3851
33022	3847
33018	3830
33008	3825
33003	3803
32988	3801
32985	3797
32945	3763
32921	3751
32910	3746
32877	3736
32873	3735
32860	3735
32833	3733
32830	3732
32815	3729
32809	3726
32796	3724
32793	3724
32790	3721
32789	3719
32763	3714
32759	3714
32726	3711
32722	3706
32716	3690
32666	3690
32530	3666
32529	3657
32515	3648
32513	3647
32511	3638
32507	3634
32481	3625
32474	3575
32461	3571
32443	3565
32442	3557
32434	3550
32410	3543
32408	3537
32407	3535
32391	3529
32379	3519
32351	3518
32330	3514
32321	3513
32318	3511
32300	3503
32290	3503
32277	3497
32273	3495
32273	3491
32263	3481
32258	3478
32255	3476
32241	3475
32233	3472
32231	3470
32227	3461
32226	3456
32191	3447
32183	3442
32181	3442
32104	3434
32099	3424
32088	3421
32075	3420
32050	3412
32042	3407
32032	3403
31994	3393
31979	3383
31975	3382
31966	3374
31964	3360
31961	3359
31943	3350
31918	3348
31914	3335
31891	3310
31870	3304
31834	3273
31834	3268
31810	3261
31797	3260
31767	3258
31726	3253
31700	3230
31693	3221
31691	3212
31690	3207
31668	3206
31667	3202
31666	3199
31617	3196
31611	3187
31598	3183
31572	3179
31542	3176
31508	3175
31499	3162
31497	3161
31480	3160
31475	3154
31469	3154
31461	3143
31409	3140
31402	3139
31392	3131
31374	3114
31364	3113
31360	3111
31338	3106
31315	3105
31303	3104
31288	3082
31280	3076
31269	3074
31260	3072
31258	3056
31257	3050
31213	3042
31213	3031
31165	3022
31160	3020
31155	3019
31146	3017
31143	3016
31121	3010
31121	3009
31117	2997
31063	2984
31062	2975
31029	2974
31022	2973
31019	2973
31013	2970
30968	2952
30952	2951
30951	2947
30943	2942
30941	2940
30925	2939
30922	2930
30918	2928
30909	2922
30905	2916
30893	2912
30863	2909
30853	2905
30845	2875
30833	2866
30826	2863
30823	2856
30802	2848
30774	2845
30762	2816
30734	2802
30731	2795
30729	2794
30698	2785
30667	2783
30661	2780
30573	2764
30571	2754
30567	2748
30564	2747
30563	2743
30536	2735
30515	2714
30502	2713
30483	2702
30443	2697
30414	2685
30414	2681
30407	2677
30387	2674
30376	2670
30371	2661
30333	2661
30313	2647
30289	2641
30278	2636
30256	2635
30237	2635
30229	2619
30198	2619
30188	2618
30186	2618
30181	2613
30165	2596
30086	2589
30078	2584
30077	2573
30065	2570
30063	2562
30030	2559
30008	2552
30000	2550
29984	2549
29939	2542
29938	2539
29937	2536
29928	2531
29924	2527
29901	2524
29890	2522
29874	2520
29869	2518
29846	2513
29813	2508
29810	2506
29804	2502
29781	2496
29770	2491
29764	2488
29755	2477
29753	2474
29729	2448
29727	2446
29668	2444
29645	2422
29638	2400
29636	2400
29601	2396
29579	2391
29568	2390
29546	2387
29539	2380
29531	2380
29522	2364
29519	2360
29506	2355
29503	2353
29493	2349
29471	2341
29441	2333
29424	2330
29412	2318
29406	2309
29392	2308
29389	2306
29386	2304
29378	2303
29362	2303
29357	2300
29353	2295
29352	2284
29335	2279
29334	2278
29270	2260
29244	2259
29242	2243
29225	2243
29211	2237
29207	2221
29184	2216
29163	2211
29152	2203
29111	2196
29109	2196
29083	2196
29076	2188
29069	2186
29060	2182
29053	2180
29052	2164
29039	2158
29031	2145
29024	2141
28983	2140
28936	2139
28933	2131
28931	2129
28929	2123
28916	2116
28908	2113
28905	2113
28896	2112
28840	2111
28834	2102
28828	2087
28820	2084
28810	2083
28786	2080
28765	2079
28765	2070
28752	2062
28728	2055
28711	2055
28689	2052
28679	2050
28669	2046
28661	2040
28656	2038
28618	2030
28610	2030
28608	2023
28604	2023
28581	2019
28579	2018
28546	2012
28532	2006
28531	2004
28516	1999
28509	1994
28508	1992
28493	1990
28465	1990
28463	1988
28440	1987
28433	1985
28416	1985
28410	1982
28404	1972
28395	1960
28385	1954
28344	1953
28344	1949
28335	1949
28317	1948
28314	1944
28311	1937
28294	1936
28289	1934
28277	1925
28245	1917
28242	1915
28225	1913
28216	1910
28172	1907
28172	1906
28154	1879
28137	1875
28105	1873
28102	1871
28090	1869
28078	1861
28074	1858
28071	1857
28064	1849
28046	1849
28032	1845
28008	1841
27985	1841
27980	1827
27967	1816
27959	1815
27957	1810
27952	1806
27938	1784
27935	1782
27921	1778
27913	1778
27880	1777
27877	1777
27874	1766
27873	1763
27868	1762
27867	1754
27858	1749
27775	1747
27764	1741
27741	1734
27719	1732
27711	1730
27710	1730
27707	1729
27704	1728
27674	1725
27671	1725
27663	1722
27655	1721
27645	1712
27623	1710
27606	1709
27591	1703
27557	1698
27501	1697
27489	1697
27487	1692
27467	1692
27442	1690
27438	1680
27430	1668
27406	1668
27388	1668
27379	1667
27312	1667
27302	1659
27273	1650
27268	1644
27266	1644
27265	1637
27249	1631
27206	1626
27168	1622
27165	1622
27158	1621
27153	1618
27136	1614
27134	1614
27133	1611
27108	1609
27104	1608
27086	1607
27077	1602
27076	1593
27070	1592
27066	1591
27063	1575
27052	1575
27036	1567
27036	1560
27029	1555
26991	1551
26984	1548
26981	1548
26964	1544
26954	1544
26934	1543
26931	1542
26923	1542
26923	1537
26894	1534
26890	1533
26884	1532
26879	1531
26873	1526
26864	1522
26850	1521
26805	1518
26788	1514
26759	1513
26755	1506
26743	1504
26733	1496
26657	1494
26628	1489
26622	1484
26619	1476
26599	1475
26589	1472
26568	1470
26544	1468
26544	1465
26493	1459
26477	1458
26462	1456
26461	1453
26457	1451
26453	1450
26436	1449
26432	1443
26421	1443
26421	1440
26417	1439
26416	1438
26403	1434
26392	1428
26371	1425
26365	1424
26350	1422
26315	1418
26306	1418
26304	1418
26287	1415
26281	1410
26259	1409
26234	1409
26222	1408
26189	1407
26185	1403
26169	1403
26162	1402
26157	1401
26153	1398
26142	1396
26123	1394
26102	1394
26097	1394
26085	1393
26065	1393
26057	1391
26056	1389
26055	1384
26051	1383
26049	1380
26047	1375
26043	1374
25925	1373
25925	1372
25904	1371
25892	1369
25886	1366
25879	1364
25870	1362
25867	1361
25855	1360
25840	1360
25839	1357
25835	1357
25829	1355
25815	1353
25801	1352
25801	1350
25768	1350
25745	1349
25734	1346
25703	1346
25699	1346
25682	1341
25674	1337
25670	1337
25661	1335
25643	1335
25640	1334
25638	1328
25607	1328
25596	1327
25579	1325
25578	1324
25566	1323
25555	1323
25551	1321
25530	1320
25511	1319
25505	1318
25485	1317
25473	1313
25465	1310
25460	1309
25454	1308
25433	1308
25427	1308
25411	1306
25406	1304
25379	1304
25376	1300
25373	1299
25368	1299
25357	1298
25351	1296
25349	1296
25333	1295
25327	1294
25317	1294
25316	1291
25305	1289
25302	1288
25300	1287
25298	1287
25283	1282
25225	1281
25216	1278
25200	1276
25195	1272
25186	1271
25180	1267
25171	1267
25166	1261
25164	1261
25153	1260
25108	1260
25099	1259
25098	1258
25073	1257
25051	1255
25016	1254
25016	1252
24999	1252
24996	1251
24987	1250
24975	1250
24974	1250
24971	1249
24955	1247
24947	1246
24946	1245
24944	1239
24937	1239
24935	1238
24912	1238
24884	1237
24882	1237
24881	1234
24845	1233
24814	1233
24813	1233
24801	1232
24800	1231
24785	1230
24774	1223
24768	1220
24760	1219
24740	1219
24729	1218
24723	1217
24721	1217
24716	1217
24713	1214
24709	1214
24704	1213
24703	1211
24694	1209
24692	1204
24692	1199
24690	1198
24688	1197
24654	1196
24646	1195
24644	1194
24633	1194
24613	1191
24610	1191
24558	1191
24553	1190
24533	1190
24467	1189
24461	1185
24455	1184
24435	1184
24434	1182
24418	1182
24410	1180
24384	1180
24367	1179
24360	1178
24341	1178
24336	1178
24335	1177
24334	1176
24318	1175
24292	1175
24269	1175
24247	1171
24205	1169
24199	1169
24195	1168
24194	1167
24177	1166
24130	1164
24128	1164
24110	1164
24101	1164
24071	1163
24050	1161
24041	1160
24038	1158
24034	1156
24022	1156
24015	1153
24011	1153
24009	1152
23982	1139
23977	1139
23970	1139
23967	1137
23963	1137
23962	1135
23959	1134
23951	1134
23948	1133
23933	1133
23909	1132
23900	1132
23871	1131
23866	1129
23818	1129
23808	1126
23798	1125
23790	1122
23783	1122
23773	1121
23759	1120
23750	1118
23722	1118
23703	1117
23699	1114
23676	1114
23669	1113
23654	1111
23651	1111
23648	1111
23622	1111
23614	1109
23608	1109
23598	1105
23590	1105
23584	1105
23578	1104
23576	1102
23570	1101
23556	1100
23554	1100
23551	1100
23541	1099
23541	1098
23539	1098
23471	1098
23460	1098
23449	1097
23447	1097
23432	1096
23426	1096
23400	1094
23377	1093
23366	1093
23325	1092
23317	1092
23316	1091
23295	1091
23281	1090
23275	1089
23252	1089
23249	1089
23243	1088
23224	1088
23171	1086
23164	1086
23161	1085
23160	1084
23134	1083
23133	1083
23124	1082
23117	1082
23091	1081
23087	1081
23079	1079
23070	1079
23062	1078
23054	1078
23051	1078
23043	1077
22997	1076
22974	1075
22966	1075
22952	1075
22945	1075
22919	1074
22880	1073
22880	1073
22863	1072
22860	1071
22859	1070
22846	1069
22835	1069
22826	1069
22823	1068
22822	1066
22814	1066
22808	1065
22807	1064
22806	1063
22801	1062
22799	1061
22799	1060
22791	1058
22790	1058
22781	1057
22781	1057
22761	1056
22757	1056
22753	1054
22750	1053
22748	1052
22733	1050
22728	1050
22725	1049
22722	1048
22720	1046
22714	1046
22698	1046
22696	1045
22682	1045
22681	1044
22673	1043
22662	1043
22653	1042
22643	1042
22628	1041
22613	1041
22609	1040
22607	1040
22600	1039
22574	1038
22558	1037
22542	1036
22538	1035
22537	1035
22532	1035
22515	1034
22512	1034
22499	1034
22494	1034
22490	1033
22487	1033
22481	1032
22462	1032
22452	1031
22440	1030
22437	1030
22434	1030
22431	1029
22424	1028
22415	1027
22401	1027
22397	1027
22396	1027
22393	1026
22374	1026
22369	1025
22321	1025
22314	1023
22304	1023
22291	1022
22289	1020
22258	1019
22252	1018
22243	1017
22241	1017
22223	1016
22206	1015
22202	1015
22197	1013
22191	1013
22182	1012
22181	1011
22177	1011
22162	1010
22158	1010
22150	1009
22131	1008
22129	1007
22121	1007
22114	1007
22106	1005
22088	1005
22086	1005
22064	1005
22062	1002
22055	1002
22044	1000
22041	999
22023	998
22021	996
22021	996
22008	996
21969	995
21961	995
21939	995
21888	994
21881	991
21880	991
21870	990
21863	990
21859	989
21856	988
21853	987
21823	986
21815	985
21812	985
21811	984
21804	984
21798	983
21794	982
21778	979
21742	979
21735	979
21734	978
21725	977
21719	976
21701	974
21690	974
21674	973
21662	972
21651	971
21649	971
21635	971
21632	971
21626	969
21620	968
21606	968
21594	967
21572	967
21568	966
21557	966
21532	966
21519	965
21518	964
21514	962
21504	962
21491	961
21482	961
21456	956
21451	956
21443	954
21427	954
21426	953
21414	953
21407	951
21406	951
21393	950
21392	950
21387	950
21383	950
21375	949
21369	947
21364	947
21359	947
21356	944
21355	943
21345	943
21299	941
21296	941
21286	939
21283	938
21264	938
21258	938
21249	937
21209	935
21205	934
21201	934
21174	934
21161	934
21146	934
21127	933
21115	933
21114	932
21071	932
21062	931
21059	930
21046	930
21040	929
21038	929
21020	928
21008	928
21002	927
20992	927
20967	927
20955	925
20954	925
20951	925
20941	924
20929	924
20926	924
20907	923
20904	923
20897	923
20891	923
20890	922
20886	920
20868	920
20868	920
20857	919
20840	918
20820	918
20797	917
20795	915
20794	915
20790	915
20768	915
20757	914
20741	914
20728	913
20695	913
20687	911
20684	911
20683	911
20679	911
20666	910
20658	910
20594	910
20594	909
20584	909
20567	908
20559	908
20555	908
20546	908
20516	906
20510	906
20493	906
20491	906
20469	905
20467	905
20466	904
20463	904
20458	904
20452	903
20451	903
20446	903
20440	902
20439	900
20436	900
20435	900
20421	900
20419	900
20419	898
20397	896
20395	896
20391	895
20387	895
20383	893
20367	892
20365	892
20361	892
20346	891
20339	891
20331	890
20328	890
20328	889
20324	888
20314	888
20305	888
20302	887
20300	887
20287	886
20277	886
20216	885
20214	885
20213	885
20202	883
20201	883
20188	882
20181	882
20172	880
20171	880
20167	880
20167	880
20163	880
20152	879
20151	879
20135	878
20129	878
20122	877
20110	876
20103	876
20075	875
20065	874
20064	874
20038	874
20031	873
20031	873
20017	872
20015	872
20014	872
20005	870
19974	870
19972	869
19965	869
19958	868
19957	868
19941	867
19926	867
19919	866
19912	866
19895	866
19886	865
19878	865
19847	865
19832	865
19809	864
19795	862
19791	862
19783	862
19782	860
19774	860
19767	859
19764	858
19736	856
19727	856
19721	855
19721	855
19715	854
19690	854
19688	854
19686	853
19684	853
19678	852
19673	852
19656	852
19628	851
19625	848
19606	848
19596	847
19582	847
19571	847
19551	844
19549	842
19538	841
19534	840
19534	840
19531	838
19531	837
19530	836
19529	836
19521	835
19509	835
19506	834
19491	834
19475	833
19469	833
19449	833
19447	832
19445	826
19443	825
19436	824
19419	823
19405	823
19391	821
19378	821
19355	821
19354	821
19353	821
19338	821
19334	820
19333	819
19327	819
19321	819
19319	818
19309	817
19308	817
19308	816
19286	815
19284	815
19283	815
19280	814
19264	814
19255	814
19249	814
19244	814
19236	813
19228	811
19222	811
19217	810
19207	810
19191	809
19180	809
19178	809
19174	807
19172	807
19159	804
19156	804
19152	804
19151	804
19145	802
19144	802
19143	802
19142	801
19140	800
19125	800
19102	799
19088	799
19067	798
19055	797
19050	797
19049	797
19047	796
19036	795
19032	795
19028	795
19004	794
19001	792
18999	792
18991	791
18990	791
18987	789
18982	788
18982	788
18978	787
18955	786
18950	785
18947	785
18917	784
18914	783
18860	783
18848	783
18843	783
18826	780
18818	780
18818	779
18816	779
18811	778
18806	778
18799	776
18793	776
18789	775
18783	773
18779	772
18772	772
18759	771
18726	771
18725	768
18722	768
18720	767
18719	766
18711	765
18669	765
18664	764
18658	763
18650	762
18650	761
18646	758
18637	758
18632	758
18621	757
18616	757
18590	756
18584	756
18583	756
18576	755
18552	754
18540	753
18526	753
18504	753
18500	752
18499	751
18483	751
18480	750
18475	749
18437	749
18433	748
18424	748
18415	747
18413	747
18411	746
18406	746
18404	746
18403	746
18396	745
18393	745
18381	744
18376	743
18372	743
18371	742
18367	741
18349	741
18344	740
18314	739
18313	738
18312	738
18308	736
18301	736
18297	735
18293	735
18293	734
18283	734
18277	734
18266	732
18255	731
18246	731
18234	730
18229	730
18221	729
18218	729
18213	729
18198	727
18187	726
18184	725
18183	725
18175	725
18171	725
18168	724
18165	723
18145	723
18136	722
18131	722
18122	722
18117	721
18117	721
18111	721
18103	720
18096	720
18090	719
18086	719
18045	718
18030	717
18028	717
18017	716
17998	716
17998	716
17994	715
17990	715
17989	714
17982	714
17962	713
17960	713
17959	713
17949	712
17928	712
17918	712
17896	712
17877	711
17876	711
17874	710
17845	709
17832	709
17831	709
17827	708
17824	708
17821	708
17817	707
17817	707
17806	706
17806	705
17790	705
17787	704
17781	703
17762	702
17755	702
17754	702
17745	701
17699	701
17697	699
17667	698
17666	698
17662	698
17660	698
17655	697
17648	697
17646	696
17645	696
17633	695
17604	695
17575	695
17574	695
17572	693
17559	692
17558	692
17534	690
17532	690
17521	689
17520	689
17506	689
17502	688
17494	688
17482	687
17460	687
17458	686
17448	686
17446	683
17442	682
17438	682
17436	682
17410	682
17409	681
17398	681
17381	680
17358	679
17353	679
17344	676
17335	676
17304	676
17302	675
17289	674
17288	673
17282	673
17260	671
17258	670
17256	669
17253	668
17247	668
17245	667
17230	667
17215	666
17208	665
17196	665
17192	665
17188	664
17187	664
17180	663
17152	662
17148	661
17143	661
17129	660
17088	660
17080	659
17065	659
17041	658
[truncated: 1,039 more rows]

## Sheet: Figure 4S1C
Single AZ Cac abundance			Descriptive statistics
Control Cac-GFP	RNAi Cac-GFP			Control (Cac-GFP)	BRP RNAi (Cac-GFP)
29545	35659		Number of values	3037	2363
45077	35853
35197	50530		Minimum	-1223	-549
25111	24887		25% Percentile	7846	4693
23451	26546		Median	13400	7988
47181	20268		75% Percentile	20384	14537
30279	30869		Maximum	55831	56965
44783	23027		Range	57054	57514
34247	49401
32391	21870		Mean	15059	10592
30390	26655		Std. Deviation	9513	8062
29436	31941		Std. Error of Mean	172.6	165.9
27585	22663
27554	20140
26190	43002
24894	27932
24827	26088
23652	22195
23410	41716
22862	17990
19985	26163
15068	50102
9337	17776
28115	56965
28105	19307
27121	31112
16369	19723
23214	19859
13405	32346
22943	29842
30942	32015
24580	19587
36401	23499
31498	29286
27058	16772
31146	19437
23013	22343
28042	22859
31095	31901
17170	31080
25936	20676
23186	22782
40214	37573
21636	29150
33969	36002
34505	26830
31356	37935
30173	24866
13924	32158
30881	31937
17669	34819
16749	25599
19108	19744
40406	19710
17915	14214
16673	33761
33542	35161
26780	26059
19714	22386
21447	24844
19112	43788
21380	32236
16666	14993
754	32933
16295	20304
24763	30777
13745	30580
20246	25285
20502	20350
16108	19921
37625	25289
16642	43112
12740	21766
21971	9716
15139	40583
21751	31481
12781	31453
13342	22298
34372	26427
32821	20450
18254	17750
20608	16851
23241	20606
41338	24836
29663	18922
29266	20793
40808	31281
39354	37681
28597	32528
32102	20573
41273	21139
30726	15140
2742	19980
24405	17810
21451	25142
28495	27684
24331	30622
13852	16268
20733	7519
15730	23518
12646	18306
15423	24581
23132	34677
14481	20255
42020	28127
13077	17717
23715	20303
32076	24280
7998	18236
2949	19773
26976	16294
23917	22340
15523	33289
25763	27358
23869	33195
14321	32340
18038	26630
20631	16043
-166	22218
11128	28248
28928	35091
23807	28245
17756	19098
22951	23166
23039	2810
23967	32086
22531	29415
28458	12591
9256	34123
22105	28173
29866	29044
38028	23552
16455	24237
21499	14866
11926	14062
24153	33391
26786	27680
29417	15853
18781	38978
23482	28081
14713	17969
17884	24842
13827	23477
12022	17208
10986	24368
23954	23003
31201	43195
18591	21549
17411	15579
25389	26848
21565	42888
31848	28572
27991	32989
28420	20189
13376	11228
26391	28206
36481	12830
19803	13326
28354	10987
15454	21870
24229	16715
21996	19262
40632	26347
30401	22750
23280	33496
27982	19321
21209	32362
25638	23088
8285	15870
15332	18039
18693	24449
45101	24365
20112	18384
13049	26219
42649	16001
21946	20078
46727	27517
32675	21169
16889	26490
35493	33631
26222	14078
14509	22125
35159	24018
37637	14856
20899	22376
26168	30849
39451	17207
13966	39606
32733	22652
47175	23392
15633	12422
10219	15218
24567	17955
37533	16530
11522	21778
29617	25886
13453	34545
42072	29464
19054	35393
7336	24914
22761	32995
14608	20306
33087	27651
33934	18542
11159	10169
21223	9473
7233	9370
46836	37695
12606	19899
14964	33035
13985	29932
31403	26860
24550	23841
16166	16451
19975	18033
18181	23332
24939	20657
26375	23600
23168	12136
12012	5713
23428	15070
16594	24793
7595	15924
29743	20165
17708	16023
17079	26049
22669	22930
19276	6400
25445	20046
46720	25066
20977	34712
33727	15029
17462	17900
33839	27864
35616	20353
19538	18365
18473	17539
20543	22637
15983	22455
12783	14977
25224	18776
15906	11327
11610	22878
7516	29135
11649	15866
33981	25804
29317	31451
18790	26418
20338	27570
36055	9454
4012	25892
13454	11123
10477	23806
38689	22706
15520	23648
19592	20958
28819	12734
32651	13553
12014	32007
27866	18548
41926	16477
8458	26532
22527	19747
26573	25053
31509	28671
21650	19166
15115	14918
24613	22855
8598	16505
26912	15724
27323	11879
19061	14884
11805	13342
46967	25406
19426	17583
28094	19658
20599	12921
3635	25482
13616	20610
28841	33353
9521	18814
41918	15661
23203	36984
18066	11356
19723	14832
19414	21218
27926	43275
24084	25881
30984	27146
5303	27541
21091	26108
6732	21840
16710	19975
20379	27112
15849	19432
19673	25910
11055	31265
21823	26887
10116	20538
17470	16517
41852	19335
15695	11159
5250	33553
18905	25453
17912	24452
9550	11686
18595	29014
14781	23397
41706	29147
8176	26454
25598	31901
27544	13812
38373	23261
25694	22095
12280	20343
45400	16299
11838	23770
18389	18800
32694	15601
9581	22815
40903	17004
31516	11191
19291	20267
39372	11998
16683	17255
16792	16220
19526	22220
31879	16308
6692	24343
10951	23571
25045	14926
11668	11751
15889	22470
36462	20873
28263	17822
10529	13102
42193	15994
21748	25192
18284	29106
22286	18819
20908	28210
18882	20904
19418	11978
21944	20367
14562	10966
23855	26009
14911	28359
35108	18909
15269	21869
22627	16758
6420	13805
13726	16495
25122	18450
34328	15185
13908	15276
17491	9119
32733	10087
20438	24689
6584	24263
13831	17263
14624	17541
9652	32320
54774	29989
30477	17534
15775	12240
17945	12685
5618	9862
10337	19471
15004	21887
14775	15389
15533	13367
9193	19331
23609	18746
26906	21783
36506	8368
6126	12468
15065	11473
20273	23294
14133	14881
29217	9404
15501	33395
14823	20264
11332	12736
7594	29386
17369	23306
17045	15725
22281	19668
12679	14823
14002	31191
27523	20694
26562	18076
25987	23691
12342	9279
7628	21763
23950	11273
12383	19149
6031	18177
9861	11870
12835	11879
8171	19200
14416	18671
18059	25089
16513	30794
12388	8566
6319	15352
9510	20676
13813	15706
24355	16951
10904	14084
16648	19415
21018	16528
11943	19328
47975	16870
9198	17877
17303	46482
10625	17913
32037	16997
27427	23694
15699	10337
33384	18544
16228	17539
14092	16956
30606	20017
17987	15713
39187	16245
20339	14837
24618	19852
29459	16431
15181	13210
23367	16611
10411	21283
13248	9252
48675	21857
13553	16852
13020	7060
4906	6919
3498	18625
12591	11018
29287	10839
20032	9374
27482	24694
14022	24983
21796	23388
17788	17411
23222	25159
10690	14234
29356	12413
35513	17921
20608	16490
21843	12668
38527	12183
19938	23666
15006	6779
13807	19305
31521	26470
16812	20537
23062	17240
25630	17943
5163	5688
16933	28476
16526	6624
12791	17937
19598	17818
37640	8926
16388	25803
34969	16595
7438	21710
18105	18206
35653	19705
20299	25299
5635	11811
12075	19500
10475	25101
30701	17500
9772	13131
13102	30930
16326	8739
12102	13341
24710	19322
49904	23963
19405	7815
21466	10143
16987	9380
18590	9666
7586	16158
14005	12515
11150	12571
27144	13151
12772	11847
14125	11756
20298	7682
8300	10743
18334	14993
14327	20673
25832	11041
7124	9745
30552	26096
19337	7153
16027	6665
17159	18799
20882	8485
5124	7104
13589	17046
24752	14480
21625	22695
30367	22695
20743	21242
2778	23881
35517	9945
5607	16074
14483	14871
22747	6756
30238	24026
16450	15237
19032	12335
19742	26616
24568	13735
23533	14967
22530	20821
17114	21926
45622	7701
5672	21613
20779	14752
33317	11780
6461	20265
11659	10147
12457	17229
18481	16762
16035	21802
23985	13127
11710	14160
20142	17948
27736	15948
19158	22460
21776	26514
9190	13915
8925	20159
13829	16740
4093	13407
10890	14810
11281	9862
13568	12328
24126	5312
19266	5569
12987	11757
7471	33751
14167	16774
18340	19631
12418	14428
7607	15997
15697	26314
34368	13644
13701	23206
19173	8915
21866	20763
16568	13051
26705	21229
9292	7889
5850	14261
21237	14168
29012	25209
6035	25083
10161	5374
24161	5631
12968	11686
13406	11390
8928	14199
42603	16758
17486	11097
12258	16514
22886	20542
11462	10227
20929	8854
24333	9459
9156	11836
12191	8671
8643	14792
11913	29406
21667	20609
27546	18206
4614	18955
22176	20802
21828	22962
43714	16440
7671	8540
21288	7217
5227	19644
13331	21053
13160	15565
21268	21611
23845	8132
39774	17094
14127	21520
24351	17031
20447	16029
11468	10277
14517	7984
11221	20281
22315	24569
45308	15034
4553	6901
32818	9452
43740	13897
21554	32679
34760	15213
19075	17475
17663	16115
12409	11293
7043	14592
11907	13499
36822	19373
19924	13287
10274	19562
36835	11985
31655	31268
7293	12820
7648	20500
40048	18050
15595	7187
10155	6326
28772	16741
11189	10024
6902	8551
16201	10751
28950	6973
14129	23055
18393	9710
16508	16615
29601	9334
16523	13291
26598	8396
15195	15912
4771	18388
12533	14997
33479	21477
5154	15143
20983	11573
24136	6698
20134	7550
31719	25033
44451	20871
4459	15581
3730	11709
26500	10873
15466	9080
9284	19080
5086	11264
12586	12617
27122	12001
30543	19880
34806	13925
10026	14752
12799	7374
13017	18470
12385	14649
43035	15193
8540	5431
33976	2575
14559	11041
14688	9300
18507	8079
17323	14674
14457	9081
18090	9449
6470	16777
20621	9766
10051	6655
6786	9981
-68	20335
9762	13148
20252	6282
21894	13536
21401	7611
37120	7178
18599	22310
18063	11017
16727	6392
16141	6936
11593	10425
8033	25857
16441	16163
6619	6450
17425	18806
9416	18276
17533	18590
14893	10875
39239	12140
2022	16127
40067	16484
25860	11505
38054	15841
6967	8668
11409	16608
-15	10387
33142	24060
16484	17519
10787	8515
9934	11020
13895	10175
39334	12763
26144	7304
14361	10269
15294	6507
17999	11905
17382	13403
35552	9970
16630	8143
13453	3746
44484	7988
35568	18417
26154	13696
13130	5570
31442	13401
8510	6986
8018	7638
5269	7223
6117	7779
26383	10644
7762	14353
15783	8072
19050	17461
17912	14537
15798	10214
15224	7064
13835	9369
2034	18644
26540	7013
27073	12207
24905	10632
7833	15001
13436	12111
16592	9505
14183	8796
23291	11801
2454	5566
10136	13251
21369	6530
12769	13261
27964	15637
10951	7782
12007	4133
11706	15010
28703	11720
19979	9662
16315	4303
5815	7833
5297	9396
23731	11059
4842	11930
3266	8912
13665	6614
9674	13087
44919	11918
5049	17678
32601	12076
8029	7210
17679	11005
19301	8088
7408	7234
34428	10698
15744	4491
20226	14532
20842	13829
14550	6021
14903	16013
13690	11276
13183	9061
19871	5711
10549	21216
-994	5476
14221	8124
16941	8943
9463	15065
6415	17140
30993	18378
22656	15922
27189	5357
20613	7916
27564	20152
12364	14025
6095	8520
22154	6292
11799	5010
15716	10238
26781	9038
6343	13557
18147	8573
18903	12328
22743	8910
17748	14434
-1223	5912
14007	14721
29584	7800
23075	10853
9724	11529
32896	9921
13669	8684
8037	18854
17381	409
33342	3199
13279	9202
13877	11446
25568	12451
7933	3598
24222	12987
10492	14129
22700	10110
4110	14932
10720	7591
10549	6038
23248	6601
27977	15241
23576	9084
2489	17231
6247	13434
10182	9297
10018	5816
30970	18190
11567	7717
29043	6694
20357	17056
17457	12973
24999	11396
22199	11351
7853	4780
7748	9466
1610	11982
26141	5307
35936	14351
48733	22712
22320	9868
15048	13792
13981	10362
13924	11238
4438	9790
24732	4234
14529	6744
10793	5560
23088	19971
26132	11795
29710	4587
16759	9559
11083	4633
16899	5136
17604	12264
22407	10515
40220	8590
30057	8941
15810	19415
11192	8024
5578	12478
22026	3663
33812	2918
18072	8497
40002	5657
2530	5903
35219	8599
10401	15671
21762	8325
10724	6026
23689	13787
23529	7787
12354	17640
15485	12037
10896	18432
22212	18116
16422	8781
32582	15705
19121	2647
15568	8796
10506	13747
21456	4163
31156	8906
14892	10957
27059	2915
8952	3791
16644	11323
3126	7430
17443	6179
36654	6783
40373	14371
7760	16843
3785	5906
27626	6382
13083	10778
18479	10855
9420	5639
13915	10182
21854	6991
43275	3974
16983	3622
1553	4371
11692	4315
10496	10585
19097	8172
31872	12608
12279	5280
22589	2647
4524	3952
9110	9845
11696	13989
20617	9440
8870	2492
9333	6522
7225	12267
13958	5789
9996	5861
4853	4643
12680	7741
15525	12846
11287	11790
44625	9766
1898	2915
8152	7281
22030	12440
24872	8818
14223	8201
13653	9835
15173	7894
37086	6484
9563	7285
11441	3685
14145	4199
36885	10146
11382	7636
22666	12643
23042	11901
37081	4368
16435	6540
15392	4064
10742	5226
19999	9033
12890	10105
16833	10483
16139	7716
24281	9858
19672	2862
3289	13143
18060	8951
6429	4478
27766	7200
19778	9306
16302	6356
44496	4884
15086	1938
6282	8602
12565	2526
3221	3918
9167	3444
20210	4198
29825	8545
16950	8656
25762	4490
24919	3592
18081	10485
15648	3386
22896	11407
11725	9221
4243	4051
54721	7745
38048	3760
12662	9926
45779	1987
20701	3235
28486	2839
11972	12098
29225	3133
6773	9983
5151	4676
16985	4180
37270	6522
20862	6358
39090	4997
8521	7568
20950	8297
8649	4710
18437	1450
6398	9825
15607	1334
15498	6082
9360	10640
29883	3994
19389	3049
4732	5328
7198	5777
8934	3784
1629	19004
5122	7923
21593	5722
1397	3558
12515	13555
10385	8901
3176	7042
6817	3474
3798	7528
33855	9207
19655	13554
24025	8438
11771	5378
10094	8568
9382	7288
8305	6034
16800	8675
13030	12638
36201	4672
24147	11374
22099	2434
23458	8846
7946	3634
11972	4823
7220	5672
5577	2814
10281	7888
14100	4264
24821	7979
22133	15047
27602	4978
35751	2172
8055	6378
14498	12989
26232	2764
10853	10992
11752	4836
11640	6286
15921	3817
8590	4432
22298	12294
21020	2695
4689	9698
14080	5647
15920	7335
17892	4681
18800	5052
8446	4298
14995	5488
27114	8733
22793	5785
35949	9560
20058	5964
13947	6478
8097	5025
10376	6091
946	3981
11466	640
8353	8957
10330	4737
16359	15254
22774	9431
10872	8503
42309	9847
9733	3403
16462	5788
11197	5040
6338	1802
31403	2616
12072	3459
10997	9488
11122	11193
8174	9257
25049	9798
24790	11821
17193	12225
55831	11529
12134	4854
9801	3159
29189	7407
22028	4899
32545	4097
7892	6723
23370	16817
17325	2268
19240	15094
6955	6102
12199	5084
23860	6642
7392	6310
18085	6568
24097	3321
27123	3079
19250	4329
28724	11949
10582	8117
15472	2469
14124	5498
33137	4441
18651	4762
6046	5645
20622	8506
13174	8478
17300	8696
5289	3972
11709	6659
15476	5010
6876	6100
7940	4184
9082	7943
13833	1395
8303	15078
27539	5340
3317	6516
8990	12232
15091	2847
20303	10766
20536	2633
18927	2562
13949	4445
5805	10660
5572	4307
24110	4436
17162	3850
6213	7828
17371	5221
1952	4153
22203	5150
18076	11826
17248	10614
21629	13676
27463	11897
27200	8591
22929	5873
18534	2750
7928	18892
24744	5773
26267	13811
5180	3427
12383	1950
12099	3361
28788	13270
24286	3602
40971	2704
25265	6800
18027	8457
20190	5266
4791	10646
15620	4281
12769	1323
24682	11108
9026	5066
24506	11928
12298	3064
27463	4657
11555	2756
24075	6455
26572	3400
17398	13777
39838	4319
12129	2308
12198	3828
14795	15379
14238	7442
28208	5986
17890	4490
7382	3112
19980	7491
19137	3665
5029	7416
4842	4893
12958	11643
41275	3095
35655	-549
7806	5293
12861	12278
39377	7341
15899	7174
18392	7717
15056	4981
12417	8263
14142	10499
11891	3631
9735	14705
11470	11164
12507	2697
17288	15792
30438	18567
31976	4334
5330	12183
3819	1411
5804	8937
11614	8053
13116	5635
23234	21313
10204	3497
10783	12840
7510	8607
22176	8970
16207	2491
43658	3770
17092	7453
5108	4106
35661	13099
12915	3932
36762	5268
21100	6038
36313	13983
5649	5991
26419	5578
16502	7212
5024	7969
15015	5709
23577	4580
14681	2317
23154	18591
14747	11579
14755	8524
12394	8862
24435	7022
11379	4834
12954	7456
14194	2800
20378	5910
31208	5430
7538	8313
5288	10421
27099	8307
12206	12983
8116	6396
6320	10736
14694	13994
12687	2873
14519	12203
14406	2368
12075	10681
6935	4496
31420	4779
12377	1926
8551	3024
9330	6548
6047	4470
11198	4291
40893	1026
18208	7410
6075	6259
12925	4645
26920	2336
14152	5645
31815	6209
14711	7010
3183	2749
15866	5039
9186	15944
27677	12136
19383	19088
26638	8581
6410	5078
2245	6121
30022	7970
26634	3892
10587	5026
7952	20291
13216	7272
15076	3702
11969	19622
15897	4726
9272	6965
7827	2607
10267	12550
13868	5657
6321	7105
16726	8710
13157	5855
10238	7621
36543	8241
27929	3596
13230	13106
24770	11065
34049	9204
29293	2620
9078	11615
11000	6072
11941	4730
14540	2387
13104	9389
8223	5957
7650	6026
12345	2597
5750	6852
15604	7607
17059	5131
5193	3967
9816	12780
32327	9218
8303	2617
8750	7082
11317	8901
12481	5327
11624	9341
21885	3323
6618	5907
7729	3621
14155	9838
9954	3667
6848	2308
35609	3378
6344	9131
3358	10119
28435	7321
7970	1670
6486	13228
17298	10082
9147	4364
5693	4538
5656	4063
20490	3861
9980	8670
3527	6794
7627	6654
8749	6743
41501	3482
10333	1412
13518	4365
33123	3061
8694	8372
28382	6412
22835	7917
24539	6156
19922	8782
12664	4288
40712	4679
14812	5883
16023	961
35086	3754
19890	2807
5473	5455
13395	15166
36206	10509
12296	4766
22942	3735
12275	5259
16042	2823
5979	9390
30011	4935
7534	1511
19562	7574
21943	1562
17323	7013
31398	7848
16389	5621
6789	1609
10184	2302
7368	3106
9015	3530
27863	7067
24478	3717
18539	4105
15245	6484
4853	6701
7712	1866
15913	13947
23862	2973
36770	14670
9004	3329
28009	2777
23459	4729
18379	3457
8444	4197
1709	7252
10355	3245
15465	8654
15733	6027
27429	11202
9939	3824
14926	2271
26443	4717
14131	6008
8540	4754
15100	12433
19645	3904
9330	7663
10385	9065
16098	7433
19351	18158
7199	9724
10270	7233
23634	6845
6159	6237
9316	2837
16135	4988
11575	9637
36758	5890
21264	11309
7223	3917
25105	6141
23146	6279
29038	6264
10572	6411
5530	11390
9714	9806
7232	10864
36479	5607
14069	2305
15987	4991
16885	3976
14944	3933
10334	8581
6198	7806
26107	4873
10563	19743
14172	5826
17555	3326
12267	3241
27746	4716
6467	9256
25727	3798
26474	3468
31612	14772
25432	5743
14468	7126
28234	2327
8856	11988
19913	4699
8627	3478
30257	2087
8621	1853
26798	8559
9889	12442
16789	7847
-171	2390
17813	2459
7791	3760
5285	6251
26454	4730
17260	5964
4031	5357
36592	8821
4144	13238
7845	2082
6495	9570
21588	6400
6538	12379
10877	9444
4107	8953
13027	10839
7808	972
18020	4507
13121	4771
13862	1840
12000	1956
8936	5973
2178	3725
5050	4461
21530	6567
11166	5550
10624	9487
14321	7096
18702	3570
18326	3047
33589	2978
17028	1753
15995	5723
5521	6008
5120	4366
26881	8180
22078	4211
14309	4731
15223	7270
6906	7360
1210	5304
10177	4514
6019	3603
34296	2271
26348	4475
32016	7297
12053	5747
22824	2544
28115	6983
12757	17088
4372	9529
8829	5767
21316	2392
8035	6500
6519	13257
22984	7193
27012	3774
7417	13008
9854	10466
25181	11494
17562	3612
8337	8132
4242	10504
17246	6028
6425	4819
29321	8148
19916	3945
7238	5014
15075	10807
11986	5898
18660	3496
5416	2323
36445	2946
17369	2698
5674	15337
20613	7954
14903	10443
13777	10373
18895	9360
3483	11601
7397	2671
20498	8258
26145	11532
20111	1710
6512	4405
2814	3408
22900	3739
1616	7464
29394	7523
14719	11329
9376	3365
14736	3768
19919	800
15993	4862
25311	10754
9322	11422
23567	10344
15761	6499
13962	7967
19658	5410
22209	7462
9836	873
23450	12681
6261	15927
22068	6122
12151	3963
1135	6218
17430	3038
26827	3287
5157	9092
26007	6733
30539	4988
437	4799
24185	6100
27863	4758
10390	2740
9106	4483
1066	8554
15803	5946
4841	16080
13983	5808
23798	8336
30119	794
24444	6587
27386	6114
49618	7717
14608	10456
17573	4195
10277	6319
27883	2147
30496	6087
12446	3971
12210	8713
22235	10699
2578	6130
17518	6786
15377	5255
5182	6371
13044	3712
25510	5910
18855	5696
25170	7405
16948	2787
5803	6645
38458	756
16473	6813
12588	7810
21229	6170
23914	5033
5505	4187
8183	2830
31759	10828
10613	3747
24030	8511
22210	4037
10291	4560
14494	6133
25069	4233
9716	7968
21810	5352
18954	484
12127	16468
3347	682
27033	4766
13771	470
39316	4715
8487	8420
11387	9359
12914	846
2735	4548
11257	10058
15286	2942
23986	6480
17839	6894
19766	3580
17330	6672
6309	7777
16325	5793
3699	3312
13095	3390
11781	7501
18842	12006
34215	6462
7344	1340
27887	18001
17194	2992
21964	3940
30083	2077
4423	6928
1066	5844
15840	4608
1612	13133
8758	5757
6200	6094
1612	5643
8631	18601
8434	2092
13999	3476
3717	6745
25195	3391
4323	1082
23700	5486
6147	9545
13786	5774
15899	6165
8346	1546
18731	15294
7895	3991
18146	8597
18351	6337
33926	9154
19438	11464
4789	13354
9167	2773
20006	3816
8638	2308
15064	11711
7630	10571
14823	5123
32468	3088
14803	8005
39044	10619
5903	2643
7352	7725
4706	2566
22268	2248
15346	3497
15724	6524
28723	2658
16795	17882
16237	4919
4631	4814
5855	4064
18490	5180
23124	6723
5843	4814
5541	2835
3873	4264
11538	3226
7631	9663
12291	5630
5329	6543
24259	7818
30747	2666
11117	4832
12552	4054
5462	13456
4289	1286
2381	5472
7100	4498
7670	4693
4946	4870
22068	10410
22991	5085
14746	1762
22544	5926
16461	3319
5296	1387
2775	7042
12074	2599
7246	5224
5080	4621
15459	3643
4000	3132
22901	5881
15252	13971
18722	7475
3296	5981
6344	6873
13522	6486
12829	4548
8075	8678
10404	3544
3615	4251
14973	5159
10000	11302
2847	3216
2637	5968
15093	11047
12023	11028
26742	3036
15068	12890
11143	5808
13211	4382
22293	1780
8501	6464
20022	3797
10411	5625
10311	7733
7721	12822
20892	13010
5783	6991
17505	5756
14822	12760
9940	9859
21126	5766
8847	2854
9392	3558
9506	6287
12360	7356
16861	4743
15986	3687
23122	13274
26538	2177
3339	4654
21149	4957
18284	10878
15536	12131
1194	6293
8297	8582
11008	4960
17764	10564
3935	3214
5851	6280
20738	11217
25000	898
7173	1039
7848	2602
25706	6446
20808	2676
27142	4606
18283	2171
16820	10646
6020	8864
15919	4653
23480	5535
22869	3833
21676	5147
12087	4642
10001	2818
9903	3562
26224	1967
10463	14082
25757	4145
7540	5664
14764	3123
8526	5460
20418	2362
11225	6785
9875	6532
9141	7407
9288	11197
17134	11302
20387	1783
32219	6204
27355	8230
10369	12809
24616	4508
17859	10509
29696	9489
16468	6894
10539	6017
5037	5970
10293	5988
25452	5292
4613	3898
6607	4118
17070	4870
5723	5176
22321	8035
2246	8377
21180	13693
10032	11155
21117	3662
5306	3653
971	2842
934	5486
5288	2043
12151	6975
2680	8034
35309	3345
3718	3468
8620	742
7642	4206
16008	1672
13768	6669
8962	12831
24491	4078
25728	6761
1464	10339
10933	3919
8790	3862
20793	4451
22281	3085
31022	5355
9632	10882
15892	10279
16125	11144
7136	8246
8151	1745
10076	8997
10511	10615
24508	4895
8268	3570
11113	3189
21333	3718
17665	3476
11543	7496
8412	14943
11509	5554
9236	3343
6343	2841
49629	4946
17463	6221
13126	7811
7233	8912
6817	5085
9656	14885
12707	2100
14827	4903
12558	6387
19480	8857
18259	9555
18785	13991
20775	7497
1830	19419
3631	4184
23464	4164
4124	9679
19915	7219
18415	5079
10439	6331
3523	2325
13454	5251
10184	12199
13472	10002
41320	10403
4726	9009
2280	5805
22443	6757
17651	2664
10651	2637
15312	11236
22275	3035
15169	9001
10409	2623
21399	13425
12360	8355
7526	12062
6208	8965
3511	2812
11886	12458
8674	3355
6369	9774
29812	4777
15092	2748
5211	10577
8667	8565
10189	9809
16613	4920
12477	2298
14672	3983
11911	7862
21071	4263
6106	13334
31289	9582
18411	4308
15821	5419
10234	3376
17923	4494
16292	16390
5484	12768
9627	6328
16494	9304
30153	5380
5980	2834
6548	9958
16160	6810
16776	7741
7276	784
12132	5915
12784	3958
9999	13418
14561	2768
9577	3574
10632	5477
5742	3694
19019	3420
16018	5170
19668	3743
12675	1803
9982	4898
5329	3224
4335	1386
9158	7825
7125	8243
32244	10934
7211	1739
21685	4204
19027	2965
19914	2943
4056	6858
13894	7979
11067	1693
6834	1837
14404	4912
24316	10545
10854	6369
26452	4773
3297	12131
22134	6517
23169	5953
11370	5402
38676	3077
12919	2770
23275	4329
7637	4130
31161	5033
8059	4867
29108	14019
20359	8884
27522	7930
7415	4125
11058	190
7522	3174
13005	15013
5356	5470
7970	1075
31089	5444
20853	3045
-73	4855
19083	19314
9731	6174
7845	3374
21838	3483
18796	8666
13104	2630
9434	3998
13216	3491
12851	16907
14020	8031
11441	9094
15370	12183
4472	3403
23408	4269
1491	3519
5550	4211
14739	9623
4295	3897
16903	4691
11089	7455
13752	10983
9162	5373
15243	2290
10243	5209
12966	1427
12453	8045
9876	3478
19697	2711
21123	2809
8177	12031
22232	1439
-443	10156
12002	5168
24049	5294
11267	3858
13768	3408
21707	1670
8035	4256
15072	7983
9169	4144
24089	3467
19405	10187
10642	7699
5399	5377
1877	6615
13627	4107
29158	4101
16898	7959
28222	4058
13249	14285
42563	9598
10091	2258
8062	5937
21908	5273
11091	6276
15303	4136
14044	11725
24019	7758
15867	5659
11597	11839
14471	7762
[truncated: 1,039 more rows]

## Sheet: Figure 4S1D
Single AZ BRp abundance (at BRP-positive AZs only)					Descriptive Statistics
Control (BRP)	BRP RNAi (BRP)					Control (BRP)	BRP RNAi (BRP)
					Number of values	3028	1055
63535	23530
63535	21685				Minimum	1533	1504
63535	18924				25% Percentile	14324	2697
63535	18800				Median	21454	4394
63535	18690				75% Percentile	30964	6618
63535	18390				Maximum	63535	23530
63535	18253				Range	62002	22026
63535	17692
63535	17028				Mean	23691	5093
63535	17010				Std. Deviation	12638	3126
63535	16826				Std. Error of Mean	229.7	96.25
63535	16611
63535	16330
63535	16324
63535	15809
63535	14643
63535	14442
63535	14426
63535	14338
63535	13811
63535	13549
63535	13468
63535	13375
63535	13373
63535	13333
63535	13194
63535	13110
63535	12998
63535	12944
63535	12877
63535	12781
63535	12752
63535	12711
63535	12516
63535	12493
63535	12209
63535	12172
63284	12146
63140	12076
63112	12039
62770	11787
62029	11694
61421	11440
61134	11428
60952	11401
60897	11315
60804	11294
60798	11232
60734	11148
60585	10907
60372	10879
60101	10873
59789	10865
59642	10815
59588	10785
59539	10702
59135	10595
59094	10438
59041	10420
59039	10407
58976	10405
58896	10404
58327	10399
58297	10283
58147	10269
58003	10267
57673	10266
57304	10152
57083	10137
56883	10107
56598	10096
56549	10057
56549	10053
56385	9974
56182	9942
56155	9918
55746	9835
55617	9825
55426	9793
55361	9774
54908	9673
54707	9554
54701	9514
54463	9495
54428	9451
54379	9430
54210	9410
53934	9343
53898	9341
53897	9313
53748	9308
53286	9240
53235	9215
53183	9194
53142	9188
52941	9161
52930	9153
52921	9140
52911	9059
52738	9027
52681	8982
52605	8952
52497	8939
52410	8850
52392	8821
52349	8817
52095	8816
52027	8796
51783	8777
51727	8771
51558	8765
51389	8749
51197	8743
51167	8715
51165	8711
51160	8659
50987	8653
50967	8639
50890	8631
50583	8628
50303	8599
50269	8596
50034	8592
49898	8589
49797	8573
49663	8571
49592	8563
49561	8544
49507	8523
49431	8521
49302	8480
49241	8475
49174	8474
49129	8464
48890	8444
48859	8435
48659	8393
48627	8358
48516	8328
48426	8324
48426	8288
48418	8280
48368	8279
48330	8268
48278	8258
48275	8254
48144	8252
48135	8244
48027	8235
47983	8155
47923	8148
47908	8145
47800	8117
47762	8089
47686	8055
47648	8034
47621	7985
47603	7969
47546	7949
47529	7929
47403	7926
47365	7913
47215	7901
47184	7884
47101	7883
47089	7880
47046	7831
46957	7801
46937	7801
46912	7800
46816	7773
46707	7764
46688	7754
46683	7746
46637	7726
46596	7714
46539	7712
46523	7712
46465	7710
46452	7710
46422	7694
46309	7681
46297	7650
46202	7629
46053	7627
46033	7623
45963	7612
45948	7607
45943	7601
45928	7583
45888	7581
45825	7568
45760	7553
45729	7544
45690	7516
45684	7496
45620	7477
45601	7456
45561	7420
45556	7417
45546	7373
45518	7369
45460	7359
45409	7341
45373	7314
45311	7303
45243	7302
45192	7292
45134	7292
45107	7291
45086	7261
45076	7260
44969	7244
44947	7234
44942	7214
44869	7201
44697	7198
44642	7192
44575	7189
44513	7176
44393	7175
44343	7139
44324	7126
44305	7104
44280	7084
44229	7079
44187	7078
44168	7071
44056	7055
44042	7034
43999	7011
43993	7009
43978	7002
43870	6986
43845	6966
43657	6949
43625	6940
43600	6939
43559	6938
43448	6926
43446	6905
43280	6898
43233	6876
43203	6875
43165	6856
43152	6855
43130	6848
43090	6838
42977	6826
42919	6819
42877	6758
42859	6749
42855	6735
42829	6720
42737	6701
42735	6693
42682	6693
42613	6667
42608	6661
42536	6648
42500	6646
42472	6640
42442	6639
42243	6618
42151	6603
42088	6601
42057	6590
41833	6581
41792	6565
41744	6559
41726	6552
41715	6546
41694	6483
41622	6466
41545	6462
41464	6455
41442	6439
41366	6438
41316	6438
41300	6415
41278	6400
41267	6399
41117	6397
41114	6394
41065	6392
41060	6382
41044	6376
41006	6356
40978	6353
40956	6339
40932	6337
40917	6324
40813	6315
40811	6295
40780	6292
40780	6287
40732	6282
40720	6281
40717	6263
40700	6260
40692	6259
40588	6252
40539	6247
40534	6245
40525	6244
40516	6243
40515	6223
40512	6212
40510	6199
40483	6197
40481	6196
40475	6194
40474	6180
40473	6172
40459	6172
40334	6125
40267	6121
40262	6119
40221	6116
40136	6103
40130	6098
40117	6091
40020	6090
39994	6089
39984	6062
39927	6059
39885	6020
39811	5998
39736	5997
39692	5975
39642	5968
39592	5943
39569	5915
39516	5914
39512	5912
39509	5902
39458	5901
39416	5891
39402	5887
39338	5876
39244	5870
39224	5867
39203	5867
39199	5861
39171	5844
39169	5820
39131	5817
39120	5784
39120	5779
39116	5766
39032	5765
39000	5748
38967	5713
38962	5712
38942	5711
38912	5708
38899	5693
38892	5666
38860	5658
38807	5655
38796	5652
38771	5651
38755	5640
38715	5634
38706	5619
38705	5613
38694	5609
38672	5606
38615	5605
38572	5591
38556	5585
38549	5569
38528	5548
38460	5522
38449	5514
38418	5506
38414	5500
38379	5495
38363	5474
38349	5451
38342	5445
38320	5444
38309	5438
38255	5424
38252	5419
38232	5419
38228	5411
38195	5410
38108	5410
38084	5401
38056	5400
38053	5395
38032	5394
38026	5369
37949	5359
37902	5346
37902	5336
37841	5317
37817	5295
37747	5292
37723	5284
37719	5279
37717	5264
37682	5262
37675	5260
37675	5258
37637	5251
37635	5234
37600	5231
37583	5231
37581	5214
37556	5213
37533	5210
37489	5190
37443	5176
37440	5170
37414	5168
37406	5157
37374	5156
37346	5147
37300	5135
37283	5133
37263	5112
37255	5112
37221	5109
37204	5096
37170	5090
37126	5090
37118	5049
37094	5042
37089	5024
37072	5020
37062	5019
37057	5018
37022	5017
36995	5015
36989	5003
36978	4996
36965	4992
36813	4988
36803	4986
36792	4983
36779	4948
36755	4946
36701	4930
36701	4927
36662	4918
36528	4915
36512	4914
36491	4905
36451	4905
36450	4904
36415	4894
36414	4894
36398	4872
36376	4861
36363	4856
36347	4855
36308	4855
36303	4850
36300	4835
36292	4823
36280	4816
36265	4815
36221	4801
36195	4787
36123	4781
36103	4773
36096	4771
36057	4771
36040	4767
36006	4767
35998	4765
35996	4745
35965	4727
35949	4726
35927	4713
35926	4711
35926	4706
35925	4698
35912	4698
35890	4696
35880	4694
35878	4691
35870	4691
35849	4684
35830	4675
35809	4671
35806	4637
35799	4625
35794	4618
35789	4614
35775	4613
35741	4610
35731	4607
35697	4606
35670	4570
35660	4570
35645	4567
35601	4561
35560	4556
35530	4550
35525	4536
35489	4521
35487	4520
35458	4518
35451	4514
35434	4507
35428	4504
35420	4492
35415	4485
35393	4483
35384	4482
35379	4476
35239	4474
35219	4472
35173	4472
35169	4452
35142	4451
35114	4449
35100	4444
35091	4440
35084	4428
35069	4425
35058	4424
35031	4416
35021	4401
35010	4394
34985	4381
34955	4376
34947	4372
34925	4364
34886	4363
34868	4348
34834	4347
34822	4341
34773	4336
34754	4321
34724	4319
34724	4316
34713	4314
34712	4313
34640	4308
34637	4308
34596	4305
34585	4298
34581	4298
34556	4293
34550	4285
34547	4276
34546	4260
34428	4253
34403	4249
34351	4249
34338	4230
34325	4229
34324	4228
34310	4228
34293	4227
34280	4225
34216	4215
34208	4194
34205	4180
34149	4173
34111	4172
34106	4171
34095	4156
34083	4155
34079	4152
34058	4146
34050	4145
34025	4145
33985	4142
33968	4127
33963	4125
33949	4119
33943	4111
33934	4104
33917	4104
33915	4097
33915	4096
33892	4096
33875	4070
33843	4066
33810	4062
33792	4060
33763	4059
33740	4055
33717	4053
33714	4051
33702	4044
33674	4040
33662	4035
33639	4011
33624	4009
33618	4006
33598	4004
33586	4003
33583	4000
33508	3994
33504	3990
33432	3988
33422	3950
33421	3947
33409	3939
33278	3932
33275	3929
33264	3929
33258	3925
33248	3917
33220	3916
33219	3915
33195	3901
33173	3899
33149	3893
33128	3891
33097	3884
33052	3855
33040	3851
33022	3847
33018	3830
33008	3825
33003	3803
32988	3801
32985	3797
32945	3763
32921	3751
32910	3746
32877	3736
32873	3735
32860	3735
32833	3733
32830	3732
32815	3729
32809	3726
32796	3724
32793	3724
32790	3721
32789	3719
32763	3714
32759	3714
32726	3711
32722	3706
32716	3690
32666	3690
32530	3666
32529	3657
32515	3648
32513	3647
32511	3638
32507	3634
32481	3625
32474	3575
32461	3571
32443	3565
32442	3557
32434	3550
32410	3543
32408	3537
32407	3535
32391	3529
32379	3519
32351	3518
32330	3514
32321	3513
32318	3511
32300	3503
32290	3503
32277	3497
32273	3495
32273	3491
32263	3481
32258	3478
32255	3476
32241	3475
32233	3472
32231	3470
32227	3461
32226	3456
32191	3447
32183	3442
32181	3442
32104	3434
32099	3424
32088	3421
32075	3420
32050	3412
32042	3407
32032	3403
31994	3393
31979	3383
31975	3382
31966	3374
31964	3360
31961	3359
31943	3350
31918	3348
31914	3335
31891	3310
31870	3304
31834	3273
31834	3268
31810	3261
31797	3260
31767	3258
31726	3253
31700	3230
31693	3221
31691	3212
31690	3207
31668	3206
31667	3202
31666	3199
31617	3196
31611	3187
31598	3183
31572	3179
31542	3176
31508	3175
31499	3162
31497	3161
31480	3160
31475	3154
31469	3154
31461	3143
31409	3140
31402	3139
31392	3131
31374	3114
31364	3113
31360	3111
31338	3106
31315	3105
31303	3104
31288	3082
31280	3076
31269	3074
31260	3072
31258	3056
31257	3050
31213	3042
31213	3031
31165	3022
31160	3020
31155	3019
31146	3017
31143	3016
31121	3010
31121	3009
31117	2997
31063	2984
31062	2975
31029	2974
31022	2973
31019	2973
31013	2970
30968	2952
30952	2951
30951	2947
30943	2942
30941	2940
30925	2939
30922	2930
30918	2928
30909	2922
30905	2916
30893	2912
30863	2909
30853	2905
30845	2875
30833	2866
30826	2863
30823	2856
30802	2848
30774	2845
30762	2816
30734	2802
30731	2795
30729	2794
30698	2785
30667	2783
30661	2780
30573	2764
30571	2754
30567	2748
30564	2747
30563	2743
30536	2735
30515	2714
30502	2713
30483	2702
30443	2697
30414	2685
30414	2681
30407	2677
30387	2674
30376	2670
30371	2661
30333	2661
30313	2647
30289	2641
30278	2636
30256	2635
30237	2635
30229	2619
30198	2619
30188	2618
30186	2618
30181	2613
30165	2596
30086	2589
30078	2584
30077	2573
30065	2570
30063	2562
30030	2559
30008	2552
30000	2550
29984	2549
29939	2542
29938	2539
29937	2536
29928	2531
29924	2527
29901	2524
29890	2522
29874	2520
29869	2518
29846	2513
29813	2508
29810	2506
29804	2502
29781	2496
29770	2491
29764	2488
29755	2477
29753	2474
29729	2448
29727	2446
29668	2444
29645	2422
29638	2400
29636	2400
29601	2396
29579	2391
29568	2390
29546	2387
29539	2380
29531	2380
29522	2364
29519	2360
29506	2355
29503	2353
29493	2349
29471	2341
29441	2333
29424	2330
29412	2318
29406	2309
29392	2308
29389	2306
29386	2304
29378	2303
29362	2303
29357	2300
29353	2295
29352	2284
29335	2279
29334	2278
29270	2260
29244	2259
29242	2243
29225	2243
29211	2237
29207	2221
29184	2216
29163	2211
29152	2203
29111	2196
29109	2196
29083	2196
29076	2188
29069	2186
29060	2182
29053	2180
29052	2164
29039	2158
29031	2145
29024	2141
28983	2140
28936	2139
28933	2131
28931	2129
28929	2123
28916	2116
28908	2113
28905	2113
28896	2112
28840	2111
28834	2102
28828	2087
28820	2084
28810	2083
28786	2080
28765	2079
28765	2070
28752	2062
28728	2055
28711	2055
28689	2052
28679	2050
28669	2046
28661	2040
28656	2038
28618	2030
28610	2030
28608	2023
28604	2023
28581	2019
28579	2018
28546	2012
28532	2006
28531	2004
28516	1999
28509	1994
28508	1992
28493	1990
28465	1990
28463	1988
28440	1987
28433	1985
28416	1985
28410	1982
28404	1972
28395	1960
28385	1954
28344	1953
28344	1949
28335	1949
28317	1948
28314	1944
28311	1937
28294	1936
28289	1934
28277	1925
28245	1917
28242	1915
28225	1913
28216	1910
28172	1907
28172	1906
28154	1879
28137	1875
28105	1873
28102	1871
28090	1869
28078	1861
28074	1858
28071	1857
28064	1849
28046	1849
28032	1845
28008	1841
27985	1841
27980	1827
27967	1816
27959	1815
27957	1810
27952	1806
27938	1784
27935	1782
27921	1778
27913	1778
27880	1777
27877	1777
27874	1766
27873	1763
27868	1762
27867	1754
27858	1749
27775	1747
27764	1741
27741	1734
27719	1732
27711	1730
27710	1730
27707	1729
27704	1728
27674	1725
27671	1725
27663	1722
27655	1721
27645	1712
27623	1710
27606	1709
27591	1703
27557	1698
27501	1697
27489	1697
27487	1692
27467	1692
27442	1690
27438	1680
27430	1668
27406	1668
27388	1668
27379	1667
27312	1667
27302	1659
27273	1650
27268	1644
27266	1644
27265	1637
27249	1631
27206	1626
27168	1622
27165	1622
27158	1621
27153	1618
27136	1614
27134	1614
27133	1611
27108	1609
27104	1608
27086	1607
27077	1602
27076	1593
27070	1592
27066	1591
27063	1575
27052	1575
27036	1567
27036	1560
27029	1555
26991	1551
26984	1548
26981	1548
26964	1544
26954	1544
26934	1543
26931	1542
26923	1542
26923	1537
26894	1534
26890	1533
26884	1532
26879	1531
26873	1526
26864	1522
26850	1521
26805	1518
26788	1514
26759	1513
26755	1506
26743	1504
26733
26657
26628
26622
26619
26599
26589
26568
26544
26544
26493
26477
26462
26461
26457
26453
26436
26432
26421
26421
26417
26416
26403
26392
26371
26365
26350
26315
26306
26304
26287
26281
26259
26234
26222
26189
26185
26169
26162
26157
26153
26142
26123
26102
26097
26085
26065
26057
26056
26055
26051
26049
26047
26043
25925
25925
25904
25892
25886
25879
25870
25867
25855
25840
25839
25835
25829
25815
25801
25801
25768
25745
25734
25703
25699
25682
25674
25670
25661
25643
25640
25638
25607
25596
25579
25578
25566
25555
25551
25530
25511
25505
25485
25473
25465
25460
25454
25433
25427
25411
25406
25379
25376
25373
25368
25357
25351
25349
25333
25327
25317
25316
25305
25302
25300
25298
25283
25225
25216
25200
25195
25186
25180
25171
25166
25164
25153
25108
25099
25098
25073
25051
25016
25016
24999
24996
24987
24975
24974
24971
24955
24947
24946
24944
24937
24935
24912
24884
24882
24881
24845
24814
24813
24801
24800
24785
24774
24768
24760
24740
24729
24723
24721
24716
24713
24709
24704
24703
24694
24692
24692
24690
24688
24654
24646
24644
24633
24613
24610
24558
24553
24533
24467
24461
24455
24435
24434
24418
24410
24384
24367
24360
24341
24336
24335
24334
24318
24292
24269
24247
24205
24199
24195
24194
24177
24130
24128
24110
24101
24071
24050
24041
24038
24034
24022
24015
24011
24009
23982
23977
23970
23967
23963
23962
23959
23951
23948
23933
23909
23900
23871
23866
23818
23808
23798
23790
23783
23773
23759
23750
23722
23703
23699
23676
23669
23654
23651
23648
23622
23614
23608
23598
23590
23584
23578
23576
23570
23556
23554
23551
23541
23541
23539
23471
23460
23449
23447
23432
23426
23400
23377
23366
23325
23317
23316
23295
23281
23275
23252
23249
23243
23224
23171
23164
23161
23160
23134
23133
23124
23117
23091
23087
23079
23070
23062
23054
23051
23043
22997
22974
22966
22952
22945
22919
22880
22880
22863
22860
22859
22846
22835
22826
22823
22822
22814
22808
22807
22806
22801
22799
22799
22791
22790
22781
22781
22761
22757
22753
22750
22748
22733
22728
22725
22722
22720
22714
22698
22696
22682
22681
22673
22662
22653
22643
22628
22613
22609
22607
22600
22574
22558
22542
22538
22537
22532
22515
22512
22499
22494
22490
22487
22481
22462
22452
22440
22437
22434
22431
22424
22415
22401
22397
22396
22393
22374
22369
22321
22314
22304
22291
22289
22258
22252
22243
22241
22223
22206
22202
22197
22191
22182
22181
22177
22162
22158
22150
22131
22129
22121
22114
22106
22088
22086
22064
22062
22055
22044
22041
22023
22021
22021
22008
21969
21961
21939
21888
21881
21880
21870
21863
21859
21856
21853
21823
21815
21812
21811
21804
21798
21794
21778
21742
21735
21734
21725
21719
21701
21690
21674
21662
21651
21649
21635
21632
21626
21620
21606
21594
21572
21568
21557
21532
21519
21518
21514
21504
21491
21482
21456
21451
21443
21427
21426
21414
21407
21406
21393
21392
21387
21383
21375
21369
21364
21359
21356
21355
21345
21299
21296
21286
21283
21264
21258
21249
21209
21205
21201
21174
21161
21146
21127
21115
21114
21071
21062
21059
21046
21040
21038
21020
21008
21002
20992
20967
20955
20954
20951
20941
20929
20926
20907
20904
20897
20891
20890
20886
20868
20868
20857
20840
20820
20797
20795
20794
20790
20768
20757
20741
20728
20695
20687
20684
20683
20679
20666
20658
20594
20594
20584
20567
20559
20555
20546
20516
20510
20493
20491
20469
20467
20466
20463
20458
20452
20451
20446
20440
20439
20436
20435
20421
20419
20419
20397
20395
20391
20387
20383
20367
20365
20361
20346
20339
20331
20328
20328
20324
20314
20305
20302
20300
20287
20277
20216
20214
20213
20202
20201
20188
20181
20172
20171
20167
20167
20163
20152
20151
20135
20129
20122
20110
20103
20075
20065
20064
20038
20031
20031
20017
20015
20014
20005
19974
19972
19965
19958
19957
19941
19926
19919
19912
19895
19886
19878
19847
19832
19809
19795
19791
19783
19782
19774
19767
19764
19736
19727
19721
19721
19715
19690
19688
19686
19684
19678
19673
19656
19628
19625
19606
19596
19582
19571
19551
19549
19538
19534
19534
19531
19531
19530
19529
19521
19509
19506
19491
19475
19469
19449
19447
19445
19443
19436
19419
19405
19391
19378
19355
19354
19353
19338
19334
19333
19327
19321
19319
19309
19308
19308
19286
19284
19283
19280
19264
19255
19249
19244
19236
19228
19222
19217
19207
19191
19180
19178
19174
19172
19159
19156
19152
19151
19145
19144
19143
19142
19140
19125
19102
19088
19067
19055
19050
19049
19047
19036
19032
19028
19004
19001
18999
18991
18990
18987
18982
18982
18978
18955
18950
18947
18917
18914
18860
18848
18843
18826
18818
18818
18816
18811
18806
18799
18793
18789
18783
18779
18772
18759
18726
18725
18722
18720
18719
18711
18669
18664
18658
18650
18650
18646
18637
18632
18621
18616
18590
18584
18583
18576
18552
18540
18526
18504
18500
18499
18483
18480
18475
18437
18433
18424
18415
18413
18411
18406
18404
18403
18396
18393
18381
18376
18372
18371
18367
18349
18344
18314
18313
18312
18308
18301
18297
18293
18293
18283
18277
18266
18255
18246
18234
18229
18221
18218
18213
18198
18187
18184
18183
18175
18171
18168
18165
18145
18136
18131
18122
18117
18117
18111
18103
18096
18090
18086
18045
18030
18028
18017
17998
17998
17994
17990
17989
17982
17962
17960
17959
17949
17928
17918
17896
17877
17876
17874
17845
17832
17831
17827
17824
17821
17817
17817
17806
17806
17790
17787
17781
17762
17755
17754
17745
17699
17697
17667
17666
17662
17660
17655
17648
17646
17645
17633
17604
17575
17574
17572
17559
17558
17534
17532
17521
17520
17506
17502
17494
17482
17460
17458
17448
17446
17442
17438
17436
17410
17409
17398
17381
17358
17353
17344
17335
17304
17302
17289
17288
17282
17260
17258
17256
17253
17247
17245
17230
17215
17208
17196
17192
17188
17187
17180
17152
17148
17143
17129
17088
17080
17065
[truncated: 1,031 more rows]

## Sheet: Figure 4S1F
Single AZ Cac abundance (at BRP-positive AZs only)			Descriptive statsitics
Control (Cac-GFP)	BRP RNAi (CacC-GFP)			Control (Cac-GFP)	BRP RNAi (CacC-GFP)
			Number of values	3028	1055
29545	35659
45077	35853		Minimum	-1223	409
35197	50530		25% Percentile	7874	9061
25111	24887		Median	13423	14918
23451	26546		75% Percentile	20433	21216
47181	20268		Maximum	55831	56965
30279	30869		Range	57054	56556
44783	23027
34247	49401		Mean	15090	15933
32391	21870		Std. Deviation	9508	8764
30390	26655		Std. Error of Mean	172.8	269.8
29436	31941
27585	22663
27554	20140
26190	43002
24894	27932
24827	26088
23652	22195
23410	41716
22862	17990
19985	26163
15068	50102
9337	17776
28115	56965
28105	19307
27121	31112
16369	19723
23214	19859
13405	32346
22943	29842
30942	32015
24580	19587
36401	23499
31498	29286
27058	16772
31146	19437
23013	22343
28042	22859
31095	31901
17170	31080
25936	20676
23186	22782
40214	37573
21636	29150
33969	36002
34505	26830
31356	37935
30173	24866
13924	32158
30881	31937
17669	34819
16749	25599
19108	19744
40406	19710
17915	14214
16673	33761
33542	35161
26780	26059
19714	22386
21447	24844
19112	43788
21380	32236
16666	14993
754	32933
16295	20304
24763	30777
13745	30580
20246	25285
20502	20350
16108	19921
37625	25289
16642	43112
12740	21766
21971	9716
15139	40583
21751	31481
12781	31453
13342	22298
34372	26427
32821	20450
18254	17750
20608	16851
23241	20606
41338	24836
29663	18922
29266	20793
40808	31281
39354	37681
28597	32528
32102	20573
41273	21139
30726	15140
2742	19980
24405	17810
21451	25142
28495	27684
24331	30622
13852	16268
20733	7519
15730	23518
12646	18306
15423	24581
23132	34677
14481	20255
42020	28127
13077	17717
23715	20303
32076	24280
7998	18236
2949	19773
26976	16294
23917	22340
15523	33289
25763	27358
23869	33195
14321	32340
18038	26630
20631	16043
-166	22218
11128	28248
28928	35091
23807	28245
17756	19098
22951	23166
23039	2810
23967	32086
22531	29415
28458	12591
9256	34123
22105	28173
29866	29044
38028	23552
16455	24237
21499	14866
11926	14062
24153	33391
26786	27680
29417	15853
18781	38978
23482	28081
14713	17969
17884	24842
13827	23477
12022	17208
10986	24368
23954	23003
31201	43195
18591	21549
17411	15579
25389	26848
21565	42888
31848	28572
27991	32989
28420	20189
13376	11228
26391	28206
36481	12830
19803	13326
28354	10987
15454	21870
24229	16715
21996	19262
40632	26347
30401	22750
23280	33496
27982	19321
21209	32362
25638	23088
8285	15870
15332	18039
18693	24449
45101	24365
20112	18384
13049	26219
42649	16001
21946	20078
46727	27517
32675	21169
16889	26490
35493	33631
26222	14078
14509	22125
35159	24018
37637	14856
20899	22376
26168	30849
39451	17207
13966	39606
32733	22652
47175	23392
15633	12422
10219	15218
24567	17955
37533	16530
11522	21778
29617	25886
13453	34545
42072	29464
19054	35393
7336	24914
22761	32995
14608	20306
33087	27651
33934	18542
11159	10169
21223	9473
7233	9370
46836	37695
12606	19899
14964	33035
13985	29932
31403	26860
24550	23841
16166	16451
19975	18033
18181	23332
24939	20657
26375	23600
23168	12136
12012	5713
23428	15070
16594	24793
7595	15924
29743	20165
17708	16023
17079	26049
22669	22930
19276	6400
25445	20046
46720	25066
20977	34712
33727	15029
17462	17900
33839	27864
35616	20353
19538	18365
18473	17539
20543	22637
15983	22455
12783	14977
25224	18776
15906	11327
11610	22878
7516	29135
11649	15866
33981	25804
29317	31451
18790	26418
20338	27570
36055	9454
4012	25892
13454	11123
10477	23806
38689	22706
15520	23648
19592	20958
28819	12734
32651	13553
12014	32007
27866	18548
41926	16477
8458	26532
22527	19747
26573	25053
31509	28671
21650	19166
15115	14918
24613	22855
8598	16505
26912	15724
27323	11879
19061	14884
11805	13342
46967	25406
19426	17583
28094	19658
20599	12921
3635	25482
13616	20610
28841	33353
9521	18814
41918	15661
23203	36984
18066	11356
19723	14832
19414	21218
27926	43275
24084	25881
30984	27146
5303	27541
21091	26108
6732	21840
16710	19975
20379	27112
15849	19432
19673	25910
11055	31265
21823	26887
10116	20538
17470	16517
41852	19335
15695	11159
5250	33553
18905	25453
17912	24452
9550	11686
18595	29014
14781	23397
41706	29147
8176	26454
25598	31901
27544	13812
38373	23261
25694	22095
12280	20343
45400	16299
11838	23770
18389	18800
32694	15601
9581	22815
40903	17004
31516	11191
19291	20267
39372	11998
16683	17255
16792	16220
19526	22220
31879	16308
6692	24343
10951	23571
25045	14926
11668	11751
15889	22470
36462	20873
28263	17822
10529	13102
42193	15994
21748	25192
18284	29106
22286	18819
20908	28210
18882	20904
19418	11978
21944	20367
14562	10966
23855	26009
14911	28359
35108	18909
15269	21869
22627	16758
6420	13805
13726	16495
25122	18450
34328	15185
13908	15276
17491	9119
32733	10087
20438	24689
6584	24263
13831	17263
14624	17541
9652	32320
54774	29989
30477	17534
15775	12240
17945	12685
5618	9862
10337	19471
15004	21887
14775	15389
15533	13367
9193	19331
23609	18746
26906	21783
36506	8368
6126	12468
15065	11473
20273	23294
14133	14881
29217	9404
15501	33395
14823	20264
11332	12736
7594	29386
17369	23306
17045	15725
22281	19668
12679	14823
14002	31191
27523	20694
26562	18076
25987	23691
12342	9279
7628	21763
23950	11273
12383	19149
6031	18177
9861	11870
12835	11879
8171	19200
14416	18671
18059	25089
16513	30794
12388	8566
6319	15352
9510	20676
13813	15706
24355	16951
10904	14084
16648	19415
21018	16528
11943	19328
47975	16870
9198	17877
17303	46482
10625	17913
32037	16997
27427	23694
15699	10337
33384	18544
16228	17539
14092	16956
30606	20017
17987	15713
39187	16245
20339	14837
24618	19852
29459	16431
15181	13210
23367	16611
10411	21283
13248	9252
48675	21857
13553	16852
13020	7060
4906	6919
3498	18625
12591	11018
29287	10839
20032	9374
27482	24694
14022	24983
21796	23388
17788	17411
23222	25159
10690	14234
29356	12413
35513	17921
20608	16490
21843	12668
38527	12183
19938	23666
15006	6779
13807	19305
31521	26470
16812	20537
23062	17240
25630	17943
5163	5688
16933	28476
16526	6624
12791	17937
19598	17818
37640	8926
16388	25803
34969	16595
7438	21710
18105	18206
35653	19705
20299	25299
5635	11811
12075	19500
10475	25101
30701	17500
9772	13131
13102	30930
16326	8739
12102	13341
24710	19322
49904	23963
19405	7815
21466	10143
16987	9380
18590	9666
7586	16158
14005	12515
11150	12571
27144	13151
12772	11847
14125	11756
20298	7682
8300	10743
18334	14993
14327	20673
25832	11041
7124	9745
30552	26096
19337	7153
16027	6665
17159	18799
20882	8485
5124	7104
13589	17046
24752	14480
21625	22695
30367	22695
20743	21242
2778	23881
35517	9945
5607	16074
14483	14871
22747	6756
30238	24026
16450	15237
19032	12335
19742	26616
24568	13735
23533	14967
22530	20821
17114	21926
45622	7701
5672	21613
20779	14752
33317	11780
6461	20265
11659	10147
12457	17229
18481	16762
16035	21802
23985	13127
11710	14160
20142	17948
27736	15948
19158	22460
21776	26514
9190	13915
8925	20159
13829	16740
4093	13407
10890	14810
11281	9862
13568	12328
24126	5312
19266	5569
12987	11757
7471	33751
14167	16774
18340	19631
12418	14428
7607	15997
15697	26314
34368	13644
13701	23206
19173	8915
21866	20763
16568	13051
26705	21229
9292	7889
5850	14261
21237	14168
29012	25209
6035	25083
10161	5374
24161	5631
12968	11686
13406	11390
8928	14199
42603	16758
17486	11097
12258	16514
22886	20542
11462	10227
20929	8854
24333	9459
9156	11836
12191	8671
8643	14792
11913	29406
21667	20609
27546	18206
4614	18955
22176	20802
21828	22962
43714	16440
7671	8540
21288	7217
5227	19644
13331	21053
13160	15565
21268	21611
23845	8132
39774	17094
14127	21520
24351	17031
20447	16029
11468	10277
14517	7984
11221	20281
22315	24569
45308	15034
4553	6901
32818	9452
43740	13897
21554	32679
34760	15213
19075	17475
17663	16115
12409	11293
7043	14592
11907	13499
36822	19373
19924	13287
10274	19562
36835	11985
31655	31268
7293	12820
7648	20500
40048	18050
15595	7187
10155	6326
28772	16741
11189	10024
6902	8551
16201	10751
28950	6973
14129	23055
18393	9710
16508	16615
29601	9334
16523	13291
26598	8396
15195	15912
4771	18388
12533	14997
33479	21477
5154	15143
20983	11573
24136	6698
20134	7550
31719	25033
44451	20871
4459	15581
3730	11709
26500	10873
15466	9080
9284	19080
5086	11264
12586	12617
27122	12001
30543	19880
34806	13925
10026	14752
12799	7374
13017	18470
12385	14649
43035	15193
8540	5431
33976	2575
14559	11041
14688	9300
18507	8079
17323	14674
14457	9081
18090	9449
6470	16777
20621	9766
10051	6655
6786	9981
-68	20335
9762	13148
20252	6282
21894	13536
21401	7611
37120	7178
18599	22310
18063	11017
16727	6392
16141	6936
11593	10425
8033	25857
16441	16163
6619	6450
17425	18806
9416	18276
17533	18590
14893	10875
39239	12140
2022	16127
40067	16484
25860	11505
38054	15841
6967	8668
11409	16608
-15	10387
33142	24060
16484	17519
10787	8515
9934	11020
13895	10175
39334	12763
26144	7304
14361	10269
15294	6507
17999	11905
17382	13403
35552	9970
16630	8143
13453	3746
44484	7988
35568	18417
26154	13696
13130	5570
31442	13401
8510	6986
8018	7638
5269	7223
6117	7779
26383	10644
7762	14353
15783	8072
19050	17461
17912	14537
15798	10214
15224	7064
13835	9369
2034	18644
26540	7013
27073	12207
24905	10632
7833	15001
13436	12111
16592	9505
14183	8796
23291	11801
2454	5566
10136	13251
21369	6530
12769	13261
27964	15637
10951	7782
12007	4133
11706	15010
28703	11720
19979	9662
16315	4303
5815	7833
5297	9396
23731	11059
4842	11930
3266	8912
13665	6614
9674	13087
44919	11918
5049	17678
32601	12076
8029	7210
17679	11005
19301	8088
7408	7234
34428	10698
15744	4491
20226	14532
20842	13829
14550	6021
14903	16013
13690	11276
13183	9061
19871	5711
10549	21216
-994	5476
14221	8124
16941	8943
9463	15065
6415	17140
30993	18378
22656	15922
27189	5357
20613	7916
27564	20152
12364	14025
6095	8520
22154	6292
11799	5010
15716	10238
26781	9038
6343	13557
18147	8573
18903	12328
22743	8910
17748	14434
-1223	5912
14007	14721
29584	7800
23075	10853
9724	11529
32896	9921
13669	8684
8037	18854
17381	409
33342	3199
13279	9202
13877	11446
25568	12451
7933	3598
24222	12987
10492	14129
22700	10110
4110	14932
10720	7591
10549	6038
23248	6601
27977	15241
23576	9084
2489	17231
6247	13434
10182	9297
10018	5816
30970	18190
11567	7717
29043	6694
20357	17056
17457	12973
24999	11396
22199	11351
7853	4780
7748	9466
1610	11982
26141	5307
35936	14351
48733	22712
22320	9868
15048	13792
13981	10362
13924	11238
4438	9790
24732	4234
14529	6744
10793	5560
23088	19971
26132	11795
29710	4587
16759	9559
11083	4633
16899	5136
17604	12264
22407	10515
40220	8590
30057	8941
15810	19415
11192	8024
5578	12478
22026	3663
33812	2918
18072	8497
40002	5657
2530	5903
35219	8599
10401	15671
21762	8325
10724	6026
23689	13787
23529	7787
12354	17640
15485	12037
10896	18432
22212	18116
16422	8781
32582	15705
19121	2647
15568	8796
10506	13747
21456	4163
31156	8906
14892	10957
27059	2915
8952	3791
16644	11323
3126	7430
17443	6179
36654	6783
40373	14371
7760	16843
3785	5906
27626	6382
13083	10778
18479	10855
9420	5639
13915	10182
21854	6991
43275	3974
16983	3622
1553	4371
11692	4315
10496	10585
19097	8172
31872	12608
12279	5280
22589	2647
4524	3952
9110	9845
11696	13989
20617	9440
8870	2492
9333	6522
7225	12267
13958	5789
9996	5861
4853	4643
12680	7741
15525	12846
11287	11790
44625	9766
1898	2915
8152	7281
22030	12440
24872	8818
14223	8201
13653	9835
15173	7894
37086	6484
9563	7285
11441	3685
14145	4199
36885	10146
11382	7636
22666	12643
23042	11901
37081	4368
16435	6540
15392	4064
10742	5226
19999	9033
12890	10105
16833	10483
16139	7716
24281	9858
19672	2862
3289	13143
18060	8951
6429	4478
27766	7200
19778	9306
16302	6356
44496	4884
15086	1938
6282	8602
12565	2526
3221	3918
9167	3444
20210	4198
29825	8545
16950	8656
25762	4490
24919	3592
18081	10485
15648	3386
22896	11407
11725	9221
4243	4051
54721	7745
38048	3760
12662	9926
45779	1987
20701	3235
28486	2839
11972	12098
29225	3133
6773	9983
5151	4676
16985	4180
37270	6522
20862	6358
39090	4997
8521	7568
20950	8297
8649	4710
18437	1450
6398	9825
15607	1334
15498	6082
9360	10640
29883	3994
19389	3049
4732	5328
7198	5777
8934	3784
1629	19004
5122	7923
21593	5722
1397	3558
12515	13555
10385	8901
3176	7042
6817	3474
3798	7528
33855	9207
19655	13554
24025	8438
11771	5378
10094	8568
9382	7288
8305	6034
16800	8675
13030	12638
36201	4672
24147	11374
22099	2434
23458	8846
7946	3634
11972	4823
7220	5672
5577	2814
10281	7888
14100	4264
24821	7979
22133	15047
27602	4978
35751	2172
8055	6378
14498	12989
26232	2764
10853	10992
11752	4836
11640	6286
15921	3817
8590	4432
22298	12294
21020	2695
4689	9698
14080	5647
15920	7335
17892	4681
18800	5052
8446	4298
14995	5488
27114	8733
22793	5785
35949	9560
20058	5964
13947	6478
8097	5025
10376	6091
946	3981
11466	640
8353	8957
10330	4737
16359	15254
22774	9431
10872	8503
42309	9847
9733	3403
16462	5788
11197	5040
6338	1802
31403	2616
12072
10997
11122
8174
25049
24790
17193
55831
12134
9801
29189
22028
32545
7892
23370
17325
19240
6955
12199
23860
7392
18085
24097
27123
19250
28724
10582
15472
14124
33137
18651
6046
20622
13174
17300
5289
11709
15476
6876
7940
9082
13833
8303
27539
3317
8990
15091
20303
20536
18927
13949
5805
5572
24110
17162
6213
17371
1952
22203
18076
17248
21629
27463
27200
22929
18534
7928
24744
26267
5180
12383
12099
28788
24286
40971
25265
18027
20190
4791
15620
12769
24682
9026
24506
12298
27463
11555
24075
26572
17398
39838
12129
12198
14795
14238
28208
17890
7382
19980
19137
5029
4842
12958
41275
35655
7806
12861
39377
15899
18392
15056
12417
14142
11891
9735
11470
12507
17288
30438
31976
5330
3819
5804
11614
13116
23234
10204
10783
7510
22176
16207
43658
17092
5108
35661
12915
36762
21100
36313
5649
26419
16502
5024
15015
23577
14681
23154
14747
14755
12394
24435
11379
12954
14194
20378
31208
7538
5288
27099
12206
8116
6320
14694
12687
14519
14406
12075
6935
31420
12377
8551
9330
6047
11198
40893
18208
6075
12925
26920
14152
31815
14711
3183
15866
9186
27677
19383
26638
6410
2245
30022
26634
10587
7952
13216
15076
11969
15897
9272
7827
10267
13868
6321
16726
13157
10238
36543
27929
13230
24770
34049
29293
9078
11000
11941
14540
13104
8223
7650
12345
5750
15604
17059
5193
9816
32327
8303
8750
11317
12481
11624
21885
6618
7729
14155
9954
6848
35609
6344
3358
28435
7970
6486
17298
9147
5693
5656
20490
9980
3527
7627
8749
41501
10333
13518
33123
8694
28382
22835
24539
19922
12664
40712
14812
16023
35086
19890
5473
13395
36206
12296
22942
12275
16042
5979
30011
7534
19562
21943
17323
31398
16389
6789
10184
7368
9015
27863
24478
18539
15245
4853
7712
15913
23862
36770
9004
28009
23459
18379
8444
1709
10355
15465
15733
27429
9939
14926
26443
14131
8540
15100
19645
9330
10385
16098
19351
7199
10270
23634
6159
9316
16135
11575
36758
21264
7223
25105
23146
29038
10572
5530
9714
7232
36479
14069
15987
16885
14944
10334
6198
26107
10563
14172
17555
12267
27746
6467
25727
26474
31612
25432
14468
28234
8856
19913
8627
30257
8621
26798
9889
16789
-171
17813
7791
5285
26454
17260
4031
36592
4144
7845
6495
21588
6538
10877
4107
13027
7808
18020
13121
13862
12000
8936
2178
5050
21530
11166
10624
14321
18702
18326
33589
17028
15995
5521
5120
26881
22078
14309
15223
6906
1210
10177
6019
34296
26348
32016
12053
22824
28115
12757
4372
8829
21316
8035
6519
22984
27012
7417
9854
25181
17562
8337
4242
17246
6425
29321
19916
7238
15075
11986
18660
5416
36445
17369
5674
20613
14903
13777
18895
3483
7397
20498
26145
20111
6512
2814
22900
1616
29394
14719
9376
14736
19919
15993
25311
9322
23567
15761
13962
19658
22209
9836
23450
6261
22068
12151
1135
17430
26827
5157
26007
30539
437
24185
27863
10390
9106
1066
15803
4841
13983
23798
30119
24444
27386
49618
14608
17573
10277
27883
30496
12446
12210
22235
2578
17518
15377
5182
13044
25510
18855
25170
16948
5803
38458
16473
12588
21229
23914
5505
8183
31759
10613
24030
22210
10291
14494
25069
9716
21810
18954
12127
3347
27033
13771
39316
8487
11387
12914
2735
11257
15286
23986
17839
19766
17330
6309
16325
3699
13095
11781
18842
34215
7344
27887
17194
21964
30083
4423
1066
15840
1612
8758
6200
1612
8631
8434
13999
3717
25195
4323
23700
6147
13786
15899
8346
18731
7895
18146
18351
33926
19438
4789
9167
20006
8638
15064
7630
14823
32468
14803
39044
5903
7352
4706
22268
15346
15724
28723
16795
16237
4631
5855
18490
23124
5843
5541
3873
11538
7631
12291
5329
24259
30747
11117
12552
5462
4289
2381
7100
7670
4946
22068
22991
14746
22544
16461
5296
2775
12074
7246
5080
15459
4000
22901
15252
18722
3296
6344
13522
12829
8075
10404
3615
14973
10000
2847
2637
15093
12023
26742
15068
11143
13211
22293
8501
20022
10411
10311
7721
20892
5783
17505
14822
9940
21126
8847
9392
9506
12360
16861
15986
23122
26538
3339
21149
18284
15536
1194
8297
11008
17764
3935
5851
20738
25000
7173
7848
25706
20808
27142
18283
16820
6020
15919
23480
22869
21676
12087
10001
9903
26224
10463
25757
7540
14764
8526
20418
11225
9875
9141
9288
17134
20387
32219
27355
10369
24616
17859
29696
16468
10539
5037
10293
25452
4613
6607
17070
5723
22321
2246
21180
10032
21117
5306
971
934
5288
12151
2680
35309
3718
8620
7642
16008
13768
8962
24491
25728
1464
10933
8790
20793
22281
31022
9632
15892
16125
7136
8151
10076
10511
24508
8268
11113
21333
17665
11543
8412
11509
9236
6343
49629
17463
13126
7233
6817
9656
12707
14827
12558
19480
18259
18785
20775
1830
3631
23464
4124
19915
18415
10439
3523
13454
10184
13472
41320
4726
2280
22443
17651
10651
15312
22275
15169
10409
21399
12360
7526
6208
3511
11886
8674
6369
29812
15092
5211
8667
10189
16613
12477
14672
11911
21071
6106
31289
18411
15821
10234
17923
16292
5484
9627
16494
30153
5980
6548
16160
16776
7276
12132
12784
9999
14561
9577
10632
5742
19019
16018
19668
12675
9982
5329
4335
9158
7125
32244
7211
21685
19027
19914
4056
13894
11067
6834
14404
24316
10854
26452
3297
22134
23169
11370
38676
12919
23275
7637
31161
8059
29108
20359
27522
7415
11058
7522
13005
5356
7970
31089
20853
-73
19083
9731
7845
21838
18796
13104
9434
13216
12851
14020
11441
15370
4472
23408
1491
5550
14739
4295
16903
11089
13752
9162
15243
10243
12966
12453
9876
19697
21123
8177
22232
-443
12002
24049
11267
13768
21707
8035
15072
9169
24089
19405
10642
5399
1877
13627
29158
16898
28222
13249
42563
10091
8062
21908
11091
15303
14044
24019
15867
11597
[truncated: 1,031 more rows]
