# Supplementary material for: Regulation of presynaptic Ca2+ channel abundance at active zones through a balance of delivery and turnover
Source: eLife. 2022 Jul 14;11:e78648. doi: 10.7554/eLife.78648 (PMC9352347; doi:10.7554/eLife.78648)
Supplement: Figure 4—source data 1. [file elife-78648-fig4-data1.xlsx]

## Sheet: Figure 4B
Single AZ BRP (Max Pixel Intensity)				DESCRIPTIVE STATISTICS					ANOVA							Multiple comparisons
Control	BRPdef/+	BRP RNAi			Control	BRPdef/+	BRP RNAi		Table Analyzed	BRP pooled (with bg subtracted)
				Number of values	1779	1350	1140		Data sets analyzed	A-C						Number of families	1
63535	40939	18924														Number of comparisons per family	2
57323	40917	18183		Minimum	2470	938	113		ANOVA summary							Alpha	0.05
55015	39359	18139		25% Percentile	11564	6884	850.8		F	1703
53256	38189	15809		Median	16519	10016	1469		P value	<0.0001						Dunnett's multiple comparisons test	Mean Diff.	95.00% CI of diff.	Below threshold?	Summary	Adjusted P Value	A-?
52392	37572	13549		75% Percentile	22729	14761	4193		P value summary	****						Control vs. BRPdef/+	6627	6070 to 7184	Yes	****	<0.0001	B	BRPdef/+
49663	36193	13468		Maximum	63535	40939	18924		Significant diff. among means (P < 0.05)?	Yes						Control vs. BRP RNAi	15355	14770 to 15940	Yes	****	<0.0001	C	BRP RNAi
49561	36051	12781		Range	61065	40001	18811		R squared	0.444
48627	35690	12711														Test details	Mean 1	Mean 2	Mean Diff.	SE of diff.	n1	n2	q	DF
48426	35626	12146		Mean	18161	11534	2806		Brown-Forsythe test							Control vs. BRPdef/+	18161	11534	6627	250.6	1779	1350	26.45	4266
47266	35319	12039		Std. Deviation	8888	6493	2698		F (DFn, DFd)	361.3 (2, 4266)						Control vs. BRP RNAi	18161	2806	15355	263.4	1779	1140	58.3	4266
47184	35103	11159		Std. Error of Mean	210.7	176.7	79.91		P value	<0.0001
47151	34852	11148							P value summary	****
46707	34358	10822							Are SDs significantly different (P < 0.05)?	Yes
46539	33719	10702
45963	33520	10595							Bartlett's test
45928	33116	10586							Bartlett's statistic (corrected)	1455
45684	33031	10283							P value	<0.0001
45192	32507	10198							P value summary	****
44947	32267	10096							Are SDs significantly different (P < 0.05)?	Yes
44627	32074	10085
44324	31977	10057							ANOVA table	SS	DF	MS	F (DFn, DFd)	P value
44229	30980	10053							Treatment (between columns)	164179566776	2	82089783388	F (2, 4266) = 1703	P<0.0001
44042	30749	9997							Residual (within columns)	205614501097	4266	48198430
43446	29636	9942							Total	369794067872	4268
42919	29598	9918
42613	29249	9880							Data summary
42500	29091	9835							Number of treatments (columns)	3
42456	28987	9793							Number of values (total)	4269
42088	28700	9495
42088	28434	9430
41833	28223	9410
41622	28057	9343
41464	27855	9341
41267	27846	9313
40978	26970	9308
40780	26824	9240
40692	26819	9232
40481	26731	9161
40475	26722	9153
40474	26288	8982
40334	26279	8944
40221	26142	8895
40117	26032	8850
39998	26012	8743
39994	25944	8715
39811	25930	8712
39531	25831	8659
39516	25754	8639
39512	25738	8628
39458	25716	8599
39435	25710	8571
39416	25644	8563
39203	25594	8464
39120	25536	8435
38899	25307	8393
38888	25239	8288
38755	25186	8268
38705	24998	8254
38579	24974	8252
38399	24899	8186
38349	24789	8148
38203	24752	8089
38056	24656	7944
37717	24639	7929
37533	24593	7883
37489	24380	7880
37414	24220	7801
37374	24198	7800
37221	24194	7781
37210	24171	7726
37204	24049	7712
37062	24006	7710
36955	23956	7678
36803	23877	7629
36701	23875	7623
36701	23824	7602
36528	23815	7568
36451	23798	7553
36398	23767	7553
36342	23655	7420
36265	23494	7417
36195	23387	7373
36096	23369	7359
35933	23323	7309
35925	23283	7292
35849	23163	7292
35809	23091	7291
35670	23030	7261
35660	23009	7257
35428	22909	7234
35407	22906	7227
35151	22775	7173
35100	22678	7141
35081	22676	7092
34985	22638	7079
34865	22567	7078
34640	22450	7029
34639	22420	7011
34582	22275	6966
34508	22088	6949
34426	22065	6938
34402	21959	6905
34351	21768	6875
34338	21742	6859
34324	21727	6855
34219	21726	6848
34216	21707	6838
34149	21685	6720
34111	21681	6701
34106	21617	6693
34050	21581	6693
33924	21560	6680
33917	21493	6664
33807	21448	6649
33778	21402	6648
33731	21366	6640
33674	21315	6639
33639	21177	6598
33583	21162	6592
33581	21160	6574
33508	21128	6558
33444	21128	6546
33432	21117	6455
33422	21079	6453
33421	21054	6446
33409	21036	6438
33390	21008	6382
33275	20939	6380
33227	20828	6375
33220	20712	6370
33173	20545	6339
33052	20543	6315
32985	20444	6295
32901	20408	6292
32860	20377	6289
32849	20360	6282
32809	20319	6252
32793	20282	6245
32763	20273	6244
32762	20251	6212
32759	20188	6197
32646	20113	6172
32559	20068	6125
32527	20023	6121
32507	20004	6119
32461	19935	6118
32442	19921	6103
32258	19870	6089
32255	19805	6042
32104	19749	6006
32101	19719	5998
32059	19663	5997
32050	19652	5976
32032	19586	5962
31996	19538	5891
31979	19467	5887
31961	19364	5870
31870	19296	5867
31834	19245	5843
31726	19229	5817
31691	19218	5800
31690	19151	5796
31666	19139	5782
31374	19091	5771
31284	19043	5738
31269	19029	5730
31268	18965	5713
31154	18930	5711
31152	18911	5658
31029	18905	5652
31019	18898	5651
30943	18891	5634
30909	18872	5606
30876	18807	5605
30871	18802	5604
30833	18714	5591
30802	18611	5522
30774	18607	5506
30762	18607	5478
30734	18592	5474
30731	18589	5445
30571	18519	5441
30502	18450	5433
30387	18401	5424
30313	18282	5412
30229	18278	5411
30078	18255	5410
29939	18209	5395
29931	18116	5392
29914	18115	5317
29846	18091	5302
29813	18074	5295
29810	18062	5292
29755	18050	5284
29690	18045	5262
29680	18018	5260
29645	18006	5258
29636	17926	5232
29582	17920	5231
29568	17911	5213
29546	17906	5210
29539	17891	5175
29471	17841	5170
29412	17832	5169
29406	17831	5168
29389	17742	5157
29353	17674	5133
29351	17606	5112
29335	17551	5109
29242	17538	5103
29225	17510	5090
29207	17462	5052
29109	17435	5024
29083	17427	5002
29081	17353	4988
29072	17244	4987
29060	17196	4967
29025	17195	4961
29024	17176	4960
28983	17149	4948
28908	17122	4904
28896	17117	4900
28891	17106	4894
28865	17049	4861
28834	17013	4856
28817	16883	4855
28669	16879	4835
28632	16861	4801
28610	16845	4775
28581	16833	4771
28579	16811	4771
28542	16802	4767
28510	16776	4767
28497	16772	4765
28493	16771	4732
28465	16771	4726
28463	16725	4711
28385	16713	4706
28314	16702	4698
28311	16682	4698
28172	16624	4694
28172	16579	4671
28046	16571	4669
28008	16492	4658
27985	16489	4637
27985	16489	4615
27935	16462	4613
27913	16398	4604
27877	16378	4562
27873	16356	4561
27774	16308	4557
27764	16299	4536
27718	16295	4521
27594	16265	4518
27559	16261	4514
27540	16251	4507
27515	16230	4504
27493	16230	4498
27481	16202	4492
27422	16197	4485
27388	16185	4474
27335	16169	4464
27312	16140	4452
27292	16127	4450
27266	16124	4440
27165	16101	4440
27158	16098	4428
27134	16096	4401
27133	16075	4401
27129	16045	4364
27076	16036	4348
27066	15996	4339
27052	15974	4321
26984	15968	4319
26981	15907	4316
26954	15903	4298
26951	15897	4265
26934	15855	4253
26898	15826	4238
26891	15796	4230
26873	15794	4228
26850	15757	4227
26788	15721	4215
26775	15707	4194
26743	15702	4194
26589	15699	4190
26568	15695	4186
26511	15681	4180
26493	15630	4152
26477	15620	4146
26462	15609	4145
26457	15562	4136
26436	15558	4127
26403	15541	4125
26365	15528	4114
26325	15518	4112
26304	15516	4104
26269	15499	4097
26259	15484	4096
26254	15431	4081
26232	15413	4070
26222	15391	4070
26196	15390	4066
26133	15379	4059
26108	15343	4053
26102	15338	4051
26095	15286	4051
26084	15286	4042
26065	15273	4040
26056	15269	4035
25870	15216	4032
25855	15200	4031
25855	15195	4009
25815	15168	4004
25801	15156	4003
25770	15120	3947
25703	15030	3939
25702	14995	3925
25699	14993	3922
25688	14988	3922
25674	14951	3917
25621	14940	3901
25607	14936	3864
25603	14936	3855
25578	14927	3851
25566	14924	3828
25555	14924	3804
25530	14911	3748
25511	14911	3735
25465	14896	3728
25452	14891	3726
25377	14887	3726
25373	14823	3724
25351	14805	3724
25349	14794	3714
25334	14791	3714
25252	14786	3706
25237	14753	3698
25212	14751	3657
25200	14745	3655
25190	14729	3639
25164	14713	3638
25150	14688	3630
25125	14638	3629
25098	14600	3620
25079	14587	3583
25064	14550	3575
25054	14526	3571
25051	14520	3565
25020	14495	3557
24999	14485	3556
24987	14473	3537
24974	14468	3529
24971	14436	3522
24947	14429	3511
24937	14423	3508
24912	14410	3495
24911	14407	3491
24884	14405	3488
24845	14404	3481
24813	14401	3475
24800	14376	3442
24799	14364	3430
24788	14356	3424
24760	14348	3421
24740	14334	3415
24646	14328	3393
24644	14321	3382
24640	14298	3380
24628	14287	3374
24603	14262	3359
24553	14255	3327
24418	14251	3273
24360	14240	3265
24285	14239	3260
24197	14233	3258
24137	14223	3230
24128	14209	3228
24128	14191	3217
24124	14178	3212
24093	14176	3207
24071	14134	3206
24050	14118	3199
23997	14100	3196
23977	14070	3187
23962	14054	3183
23951	14042	3183
23943	14041	3175
23866	13988	3160
23830	13979	3143
23819	13950	3111
23770	13935	3101
23722	13876	3094
23720	13875	3072
23687	13873	3031
23684	13843	3029
23648	13806	3020
23620	13781	3017
23608	13758	3012
23598	13740	3009
23590	13713	3006
23576	13645	2997
23551	13623	2977
23550	13600	2973
23539	13566	2951
23510	13565	2939
23503	13548	2930
23461	13529	2928
23461	13523	2922
23449	13518	2912
23447	13496	2905
23325	13480	2892
23303	13476	2884
23299	13435	2863
23285	13423	2861
23275	13391	2856
23243	13388	2845
23202	13374	2839
23161	13366	2816
23134	13345	2792
23133	13339	2786
23128	13322	2785
23126	13317	2782
23092	13247	2780
23079	13237	2764
23070	13235	2754
23062	13217	2750
23059	13212	2745
23051	13203	2736
23043	13188	2713
22950	13177	2710
22927	13170	2700
22885	13142	2698
22882	13135	2695
22880	13134	2690
22860	13133	2681
22859	13115	2677
22826	13105	2667
22799	13089	2641
22796	13082	2635
22781	13071	2619
22757	13058	2616
22753	13056	2598
22750	13042	2592
22729	13041	2584
22675	13039	2576
22643	12990	2570
22613	12980	2569
22600	12972	2567
22583	12964	2550
22558	12936	2549
22538	12932	2542
22512	12919	2539
22453	12902	2539
22437	12846	2535
22434	12841	2531
22424	12832	2524
22396	12832	2502
22372	12822	2494
22366	12805	2437
22361	12772	2421
22353	12729	2420
22348	12728	2408
22340	12724	2393
22326	12723	2391
22316	12716	2390
22279	12703	2374
22233	12698	2349
22202	12691	2349
22197	12663	2309
22191	12636	2306
22182	12624	2301
22181	12620	2299
22177	12603	2294
22162	12597	2290
22144	12587	2259
22131	12585	2243
22129	12580	2203
22072	12579	2196
22062	12572	2188
22055	12564	2186
22044	12547	2186
22043	12546	2180
22040	12542	2170
22035	12525	2158
22023	12506	2145
22021	12487	2141
21979	12480	2135
21971	12474	2119
21961	12473	2116
21907	12458	2113
21885	12378	2113
21881	12362	2107
21880	12326	2099
21859	12301	2075
21856	12299	2063
21854	12258	2058
21815	12211	2052
21811	12180	2050
21804	12168	2030
21773	12167	2000
21734	12164	1999
21734	12149	1992
21720	12103	1985
21701	12093	1982
21693	12037	1972
21690	12033	1972
21681	12031	1963
21656	12021	1954
21649	12021	1953
21644	12019	1949
21635	11998	1943
21594	11996	1937
21586	11973	1931
21584	11937	1931
21583	11935	1921
21518	11920	1917
21514	11917	1910
21514	11905	1906
21457	11884	1896
21456	11881	1880
21427	11868	1879
21387	11868	1873
21383	11865	1864
21381	11845	1828
21364	11843	1827
21359	11842	1823
21356	11836	1823
21352	11830	1820
21339	11829	1820
21325	11807	1816
21299	11789	1806
21234	11779	1795
21209	11774	1786
21205	11771	1783
21201	11760	1777
21161	11727	1776
21127	11702	1769
21062	11680	1746
21059	11672	1728
21049	11669	1722
21046	11616	1721
21040	11610	1698
21038	11583	1697
21026	11569	1693
21002	11559	1667
20992	11554	1650
20967	11541	1649
20956	11540	1641
20954	11511	1630
20951	11499	1622
20912	11491	1618
20911	11469	1613
20904	11430	1591
20897	11429	1587
20890	11416	1574
20886	11414	1555
20857	11407	1551
20829	11403	1545
20820	11388	1542
20797	11387	1541
20793	11383	1533
20790	11371	1531
20757	11365	1521
20728	11344	1518
20728	11340	1504
20679	11338	1499
20659	11337	1484
20610	11332	1475
20577	11332	1472
20567	11301	1465
20565	11299	1462
20559	11298	1459
20558	11296	1457
20555	11287	1451
20548	11284	1450
20538	11279	1442
20530	11279	1439
20521	11278	1438
20469	11273	1436
20467	11267	1436
20458	11261	1432
20454	11258	1427
20451	11242	1422
20446	11233	1421
20423	11233	1415
20419	11207	1409
20397	11198	1408
20385	11189	1398
20380	11182	1398
20375	11151	1394
20367	11149	1393
20346	11149	1383
20331	11144	1377
20327	11143	1375
20324	11122	1375
20305	11108	1366
20302	11077	1357
20228	11048	1355
20217	11044	1354
20216	11037	1353
20181	10978	1352
20172	10974	1346
20171	10953	1342
20152	10943	1341
20151	10929	1341
20135	10919	1332
20062	10884	1327
20039	10868	1325
20038	10864	1325
20027	10850	1315
20010	10849	1305
20008	10822	1305
19965	10821	1304
19964	10820	1300
19957	10770	1300
19953	10769	1296
19953	10749	1296
19945	10708	1294
19926	10686	1292
19895	10680	1287
19859	10679	1283
19853	10664	1280
19853	10653	1276
19847	10646	1273
19842	10636	1260
19816	10614	1258
19805	10613	1257
19797	10584	1257
19795	10581	1254
19791	10574	1252
19774	10548	1250
19757	10547	1248
19707	10546	1247
19686	10532	1245
19644	10499	1245
19643	10494	1244
19636	10486	1242
19633	10454	1242
19628	10437	1241
19619	10437	1238
19612	10429	1238
19606	10399	1238
19570	10392	1233
19565	10382	1233
19562	10381	1230
19534	10358	1228
19531	10338	1224
19520	10337	1223
19506	10329	1222
19497	10321	1219
19491	10315	1218
19475	10285	1217
19449	10279	1217
19447	10249	1214
19445	10246	1211
19436	10218	1208
19405	10186	1207
19355	10185	1205
19354	10182	1201
19334	10170	1198
19333	10168	1196
19327	10162	1191
19321	10160	1190
19311	10143	1189
19308	10128	1189
19308	10128	1189
19286	10116	1186
19255	10110	1184
19252	10099	1184
19236	10088	1176
19217	10076	1175
19172	10065	1167
19156	10052	1165
19151	10021	1164
19151	10011	1164
19144	10002	1163
19143	9976	1159
19135	9970	1156
19109	9961	1152
19102	9956	1145
19055	9954	1144
19047	9949	1134
19028	9940	1130
19023	9934	1129
19004	9934	1126
19002	9924	1125
18955	9916	1123
18947	9914	1119
18934	9911	1118
18926	9898	1117
18923	9892	1115
18914	9879	1114
18909	9869	1113
18887	9861	1112
18860	9856	1109
18818	9853	1109
18818	9834	1100
18808	9824	1100
18806	9812	1099
18793	9808	1099
18787	9806	1096
18779	9796	1095
18772	9792	1091
18753	9783	1086
18722	9772	1085
18719	9751	1085
18710	9747	1083
18658	9739	1083
18650	9717	1078
18650	9713	1077
18646	9709	1076
18643	9695	1076
18641	9690	1076
18632	9689	1069
18584	9689	1069
18583	9687	1063
18576	9680	1062
18552	9675	1062
18551	9672	1061
18535	9670	1060
18521	9667	1059
18504	9659	1057
18499	9627	1057
18488	9627	1057
18437	9626	1056
18422	9618	1056
18415	9561	1053
18411	9557	1049
18406	9548	1048
18404	9524	1048
18381	9517	1047
18372	9514	1046
18371	9507	1045
18368	9497	1045
18313	9492	1041
18301	9464	1039
18288	9463	1034
18283	9462	1032
18257	9440	1032
18256	9433	1031
18246	9418	1031
18245	9415	1030
18235	9408	1030
18235	9404	1029
18229	9403	1028
18221	9399	1027
18218	9389	1026
18204	9378	1026
18198	9376	1025
18196	9372	1023
18175	9371	1023
18168	9365	1018
18165	9362	1008
18146	9356	1008
18136	9355	1007
18103	9354	1007
18072	9332	1005
18045	9318	1005
18045	9314	1002
18025	9306	1000
18007	9293	998
17998	9277	996
17998	9277	990
17989	9268	987
17988	9266	986
17960	9247	985
17951	9230	984
17926	9220	983
17918	9217	980
17896	9211	980
17883	9202	977
17874	9201	974
17872	9186	974
17845	9183	971
17831	9138	971
17821	9111	971
17817	9088	969
17808	9081	967
17806	9075	967
17797	9072	966
17787	9062	966
17781	9057	962
17762	9054	962
17760	9045	956
17745	9020	955
17730	9020	952
17720	9006	951
17699	9004	950
17684	8994	950
17679	8976	948
17666	8950	947
17655	8927	945
17648	8926	943
17646	8902	941
17633	8893	940
17606	8890	939
17590	8884	935
17575	8882	934
17574	8853	933
17556	8847	933
17551	8840	932
17549	8833	930
17549	8829	928
17534	8820	928
17530	8809	926
17513	8789	926
17506	8789	924
17492	8775	919
17488	8774	914
17482	8771	913
17474	8769	911
17467	8768	910
17463	8762	908
17460	8715	908
17420	8691	908
17409	8679	906
17388	8677	906
17376	8664	904
17375	8649	904
17359	8640	903
17358	8626	902
17355	8603	896
17355	8593	896
17335	8588	895
17317	8588	895
17302	8566	893
17288	8565	892
17272	8563	892
17256	8559	891
17253	8550	891
17228	8544	885
17224	8537	885
17215	8512	882
17209	8506	880
17196	8492	879
17188	8488	878
17180	8484	878
17177	8470	877
17164	8462	876
17155	8460	874
17148	8460	873
17143	8449	872
17129	8432	871
17110	8410	869
17094	8393	868
17088	8393	867
17086	8375	865
17080	8370	864
17066	8370	860
17065	8363	859
17041	8361	856
17041	8350	856
17027	8340	855
17002	8329	853
16986	8329	850
16978	8326	846
16973	8324	845
16964	8315	844
16963	8289	842
16961	8286	841
16957	8280	841
16933	8279	838
16917	8259	837
16910	8244	835
16894	8244	834
16821	8244	834
16812	8240	833
16784	8238	832
16752	8237	829
16748	8216	827
16743	8199	827
16718	8196	825
16699	8193	823
16699	8188	821
16678	8167	819
16663	8152	818
16661	8151	817
16661	8122	814
16652	8117	814
16652	8105	813
16651	8100	812
16646	8099	811
16629	8095	810
16627	8092	809
16615	8089	809
16568	8084	808
16565	8071	807
16530	8070	806
16519	8063	805
16517	8058	804
16505	8045	800
16502	8041	800
16495	8023	799
16485	8020	798
16467	8005	797
16465	7984	796
16436	7980	796
16431	7956	795
16430	7955	794
16413	7931	794
16411	7926	792
16411	7925	791
16410	7915	789
16406	7913	788
16381	7906	787
16372	7900	785
16367	7895	785
16349	7891	785
16347	7890	783
16339	7890	783
16338	7885	780
16333	7870	780
16296	7865	778
16283	7849	777
16279	7836	776
16272	7811	775
16267	7801	772
16262	7801	772
16258	7795	772
16254	7790	772
16246	7780	771
16240	7761	771
16228	7754	770
16208	7749	766
16183	7740	765
16179	7736	760
16144	7733	757
16144	7711	753
16140	7709	752
16114	7704	752
16088	7688	749
16081	7677	748
16066	7661	746
16052	7644	745
16051	7632	744
16049	7630	742
16040	7624	737
16019	7622	734
16006	7606	734
16006	7595	733
15968	7592	732
15959	7591	732
15941	7582	730
15899	7579	727
15899	7574	725
15898	7571	723
15895	7525	722
15863	7516	721
15853	7476	720
15852	7472	719
15799	7463	719
15797	7458	715
15794	7438	714
15791	7434	714
15758	7433	714
15738	7431	713
15721	7429	711
15720	7415	711
15710	7414	709
15706	7411	709
15694	7408	705
15693	7405	704
15682	7403	703
15677	7397	701
15669	7396	701
15665	7376	700
15638	7360	700
15633	7330	699
15619	7323	698
15614	7323	697
15611	7311	690
15593	7310	687
15587	7305	685
15572	7298	682
15537	7287	681
15518	7284	679
15491	7277	679
15480	7263	676
15467	7261	676
15461	7261	676
15460	7253	675
15455	7239	675
15414	7237	674
15382	7206	674
15381	7190	673
15378	7177	672
15377	7166	672
15375	7113	669
15364	7113	667
15353	7109	665
15332	7103	663
15324	7073	662
15319	7055	661
15313	7052	660
15282	7044	659
15270	7021	656
15267	7010	655
15266	6999	652
15256	6998	651
15247	6982	649
15244	6974	646
15227	6960	645
15224	6954	643
15205	6951	642
15202	6942	642
15185	6932	642
15178	6930	641
15156	6925	640
15154	6908	639
15142	6893	638
15132	6888	635
15122	6886	632
15121	6876	632
15121	6874	631
15089	6872	628
15061	6853	628
15061	6849	628
15058	6845	628
15055	6830	626
15025	6825	625
15003	6818	624
15000	6799	623
14981	6796	622
14972	6765	621
14971	6758	620
14958	6750	619
14934	6741	615
14933	6740	611
14926	6731	609
14922	6728	609
14915	6726	606
14899	6723	602
14862	6721	601
14858	6719	601
14851	6695	598
14846	6684	598
14831	6679	594
14822	6679	594
14808	6676	592
14808	6668	591
14799	6639	591
14785	6631	579
14784	6631	575
14764	6620	573
14747	6606	569
14743	6591	569
14722	6583	568
14720	6559	568
14714	6555	567
14691	6551	565
14679	6540	564
14675	6536	559
14670	6523	553
14650	6508	552
14641	6499	551
14603	6496	548
14596	6495	541
14577	6487	539
14574	6484	538
14574	6482	537
14568	6482	537
14554	6469	534
14535	6468	529
14535	6463	527
14527	6459	525
14502	6458	525
14494	6455	524
14484	6442	523
14481	6427	521
14480	6416	521
14454	6402	516
14422	6385	514
14413	6372	512
14408	6369	512
14406	6362	509
14406	6355	507
14404	6343	507
14375	6335	506
14371	6323	505
14360	6286	500
14359	6266	496
14356	6265	495
14353	6263	491
14351	6250	490
14332	6237	486
14322	6235	486
14312	6222	475
14291	6220	467
14282	6184	467
14256	6173	465
14253	6157	465
14233	6157	463
14230	6126	460
14207	6125	453
14204	6123	450
14197	6113	450
14182	6102	447
14180	6098	444
14177	6080	438
14137	6065	435
14135	6063	432
14133	6055	432
14103	6054	427
14087	6050	425
14038	6028	424
14023	6020	408
14011	5947	400
14009	5942	399
14006	5939	396
13998	5928	394
13986	5927	394
13958	5908	390
13951	5907	389
13929	5901	386
13919	5865	384
13906	5864	382
13904	5858	381
13884	5841	374
13848	5829	373
13829	5822	369
13828	5820	367
13818	5806	364
13818	5801	363
13798	5799	352
13786	5778	344
13758	5768	336
13758	5768	335
13753	5766	313
13729	5739	309
13719	5736	296
13710	5718	280
13707	5716	239
13688	5700	236
13684	5691	235
13667	5689	218
13651	5687	193
13633	5662	152
13631	5633	146
13622	5633	113
13616	5624
13608	5616
13586	5607
13539	5602
13536	5599
13523	5564
13514	5551
13514	5535
13504	5532
13487	5512
13467	5507
13459	5505
13452	5502
13444	5499
13443	5496
13439	5461
13439	5433
13426	5430
13418	5397
13400	5395
13393	5392
13389	5384
13371	5383
13357	5380
13353	5369
13345	5365
13344	5354
13342	5350
13341	5317
13326	5316
13323	5274
13317	5251
13307	5218
13297	5215
13282	5208
13277	5166
13251	5157
13236	5155
13231	5152
13222	5152
13213	5150
13213	5106
13210	5103
13194	5101
13186	5100
13144	5096
13138	5071
13088	5069
13083	5069
13055	5040
13042	5024
13041	5012
13021	5009
13015	5001
13004	4972
12998	4972
12990	4952
12980	4946
12961	4946
12952	4944
12942	4939
12941	4884
12909	4871
12908	4871
12904	4864
12888	4852
12876	4846
12865	4839
12852	4814
12846	4803
12844	4790
12832	4790
12829	4736
12826	4717
12822	4690
12803	4681
12802	4674
12789	4671
12788	4651
12787	4645
12774	4645
12768	4645
12765	4643
12763	4642
12730	4634
12730	4632
12729	4612
12720	4586
12716	4576
12713	4570
12694	4561
12680	4551
12678	4514
12675	4489
12666	4456
12643	4452
12635	4440
12633	4413
12628	4406
12614	4368
12602	4366
12598	4363
12591	4355
12584	4319
12559	4259
12554	4235
12553	4187
12528	4136
12509	4126
12494	4104
12490	4060
12490	4053
12485	4048
12436	4044
12430	4031
12415	3997
12397	3964
12369	3959
12354	3952
12351	3938
12344	3926
12310	3913
12295	3895
12291	3892
12282	3868
12276	3861
12269	3849
12248	3818
12244	3817
12206	3808
12187	3759
12183	3748
12182	3741
12181	3735
12169	3732
12167	3728
12160	3716
12149	3700
12147	3691
12120	3666
12114	3638
12109	3632
12106	3572
12102	3507
12075	3491
12074	3489
12013	3474
12003	3453
11995	3412
11994	3411
11994	3403
11985	3388
11978	3370
11969	3369
11966	3306
11937	3256
11922	3225
11918	3214
11911	3212
11899	3188
11893	3138
11881	3135
11861	3115
11846	3109
11835	3072
11831	3055
11817	3019
11817	3017
11806	2994
11798	2994
11795	2969
11786	2963
11773	2950
11764	2937
11762	2877
11738	2842
11728	2824
11726	2812
11719	2805
11705	2690
11681	2664
11676	2656
11674	2642
11667	2617
11667	2607
11650	2577
11631	2576
11629	2573
11614	2509
11609	2497
11599	2487
11586	2409
11585	2382
11581	2298
11564	2221
11551	2153
11539	1979
11535	1968
11534	1951
11519	1901
11512	1850
11510	1834
11479	1802
11471	1753
11467	1741
11461	1718
11428	1692
11375	1336
11374	1230
11354	938
11354
11339
11337
11335
11302
11302
11285
11276
11274
11273
11267
11258
11239
11233
11219
11207
11204
11201
11200
11197
11195
11184
11163
11149
11148
11127
11123
11082
11074
11063
11053
11038
11032
11009
10998
10985
10962
10953
10944
10942
10935
10930
10906
10899
10891
10889
10867
10848
10837
10821
10810
10778
10764
10761
10754
10748
10747
10740
10739
10706
10695
10687
10683
10683
10674
10668
10668
10667
10649
10636
10627
10626
10626
10625
10609
10603
10592
10581
10576
10563
10542
10536
10533
10529
10516
10487
10478
10477
10459
10436
10400
10392
10347
10342
10341
10332
10330
10327
10313
10300
10293
10285
10274
10270
10251
10247
10246
10244
10236
10181
10180
10174
10165
10161
10134
10109
10099
10096
10047
10045
10013
10000
9996
9990
9988
9981
9975
9942
9937
9922
9921
9909
9882
9871
9861
9860
9859
9858
9857
9850
9846
9844
9838
9837
9787
9785
9782
9771
9767
9748
9747
9734
9733
9727
9716
9710
9695
9680
9659
9633
9601
9595
9558
9551
9546
9534
9528
9514
9509
9495
9495
9482
9477
9462
9454
9452
9440
9435
9385
9375
9367
9363
9354
9341
9324
9303
9303
9209
9205
9195
9195
9191
9175
9169
9160
9147
9140
9133
9130
9106
9102
9086
9050
9043
9025
8998
8997
8989
8981
8973
8963
8958
8951
8915
8894
8882
8873
8864
8861
8851
8846
8845
8842
8833
8830
8829
8812
8811
8807
8802
8784
8754
8747
8706
8705
8689
8684
8672
8633
8603
8583
8583
8573
8563
8528
8517
8508
8503
8498
8496
8457
8420
8416
8378
8353
8352
8328
8325
8300
8291
8283
8269
8256
8228
8221
8207
8204
8203
8146
8143
8142
8141
8115
8103
8044
8018
8015
7963
7953
7941
7916
7911
7909
7892
7887
7877
7871
7847
7781
7764
7741
7740
7732
7688
7676
7660
7653
7651
7648
7645
7643
7635
7630
7630
7630
7626
7601
7592
7571
7569
7553
7544
7528
7524
7515
7483
7458
7428
7400
7375
7357
7354
7324
7316
7305
7271
7262
7239
7226
7217
7180
7130
7115
7101
7093
7049
7043
7025
7001
6995
6878
6876
6847
6833
6823
6806
6798
6782
6778
6771
6718
6708
6660
6651
6597
6566
6566
6519
6516
6513
6462
6424
6413
6406
6404
6390
6363
6323
6295
6290
6189
6163
6150
6076
6024
5997
5930
5925
5922
5881
5819
5812
5732
5684
5681
5676
5645
5600
5583
5582
5525
5501
5466
5375
5369
5363
5280
5273
5238
5231
5220
5192
5140
5137
5104
5085
5078
5064
5022
5007
4904
4851
4850
4722
4573
4492
4424
4385
4353
4313
4304
4173
4170
4150
3949
3937
3661
3324
2470

## Sheet: Figure 4D
BRP Intensity (Western)				DESCRIPTIVE STATISTICS					ANOVA			Sidak's multiple comparisons										Outlier analysis
Control	BRPdef/+	BRP RNAi			Control	BRPdef/+	BRP RNAi					Number of families	1										Control	BRPdef/+	BRP RNAi
1.03761	0.596223	0.0919778		Number of values	9	10	5		Table Analyzed	Western		Number of comparisons per family	2									Method
1.11735	0.855591	0.144831							Data sets analyzed	A-C		Alpha	0.05									Grubbs (Alpha = 0.01)	G = 2.600	G = 1.669	G = 1.116
1.04848	0.843596	0.0837579		Minimum	0.8615	0.4773	0.08376
1.06068	0.632914	0.189422		25% Percentile	0.9212	0.5731	0.08787		ANOVA summary			Šídák's multiple comparisons test	Mean Diff.	95.00% CI of diff.	Below threshold?	Summary	Adjusted P Value					Number of points
0.910936	0.477261	0.173017		Median	1.038	0.6146	0.1448		F	123.7		Control vs. BRPdef/+	0.3482	0.2391 to 0.4573	Yes	****	<0.0001	A-B				# Y values analyzed	10	10	5
0.954739	0.658297			75% Percentile	1.069	0.7527	0.1812		P value	<0.0001		BRPdef/+ vs. BRP RNAi	0.5152	0.3851 to 0.6452	Yes	****	<0.0001	B-C				Outliers	1	0	0
0.93145	0.567464			Maximum	1.117	0.8556	0.1894		P value summary	****
1.07725	0.722349			Range	0.2558	0.3783	0.1057		Significant diff. among means (P < 0.05)?	Yes		Test details	Mean 1	Mean 2	Mean Diff.	SE of diff.	n1	n2	t	DF
0.4148172*	0.588993								R squared	0.9217		Control vs. BRPdef/+	1	0.6518	0.3482	0.04531	9	10	7.686	21			Control	BRPdef/+	BRP RNAi
0.861507	0.574918			Mean	1	0.6518	0.1366					BRPdef/+ vs. BRP RNAi	0.6518	0.1366	0.5152	0.05401	10	5	9.538	21		#9	0.414817
				Std. Deviation	0.08735	0.1221	0.04735		Brown-Forsythe test
* (lane identified as an outlier)				Std. Error of Mean	0.02912	0.03862	0.02117		F (DFn, DFd)	1.048 (2, 21)
and removed from further analysis									P value	0.3682
									P value summary	ns
									Are SDs significantly different (P < 0.05)?	No
									Bartlett's test
									Bartlett's statistic (corrected)	3.692
									P value	0.1578
									P value summary	ns
									Are SDs significantly different (P < 0.05)?	No
									ANOVA table	SS
									Treatment (between columns)	2.405
									Residual (within columns)	0.2042
									Total	2.61
									Data summary
									Number of treatments (columns)	3
									Number of values (total)	24

## Sheet: Figure 4E
Single AZ Cac intensity (Max pixel)				DESCRIPTIVE STATISTICS					ANOVA			Dunnett's Multiple Comparisons
Control	BRPdef/+	BRP RNAi			Control	BRPdef/+	BRP RNAi		Table Analyzed	CAC pooled (with bg subtracted)		Number of families	1
58377	55004	54162		Number of values	1757	1403	1140		Data sets analyzed	A-C		Number of comparisons per family	2
55831	51806	50530										Alpha	0.05
54774	48829	50102		Minimum	437	1098	465		ANOVA summary
49904	48403	46482		25% Percentile	9792	10962	5297		F	136.1		Dunnett's multiple comparisons test	Mean Diff.	95.00% CI of diff.	Below threshold?	Summary	Adjusted P Value	A-?
49629	47017	44840		Median	15618	15484	9298		P value	<0.0001		Control vs. BRPdef/+	479.9	-234.1 to 1194	No	ns	0.2393	B	BRPdef/+
49618	46846	43195		75% Percentile	22901	20952	16519		P value summary	****		Control vs. BRP RNAi	5309	4551 to 6067	Yes	****	<0.0001	C	BRP RNAi
48733	46725	43112		Maximum	58377	55004	54162		Significant diff. among means (P < 0.05)?	Yes
48675	44962	43002		Range	57940	53906	53697		R squared	0.05956		Test details	Mean 1	Mean 2	Mean Diff.	SE of diff.	n1	n2	q	DF
47975	44320	42888										Control vs. BRPdef/+	17268	16788	479.9	321.5	1757	1403	1.493	4297
47474	44288	40583		Mean	17268	16788	11959		Brown-Forsythe test			Control vs. BRP RNAi	17268	11959	5309	341.5	1757	1140	15.55	4297
47175	43794	40104		Std. Deviation	9743	8127	8745		F (DFn, DFd)	23.75 (2, 4297)
46967	42865	38978		Std. Error of Mean	232.4	217	259		P value	<0.0001
46836	42336	38701							P value summary	****
46727	41885	37695							Are SDs significantly different (P < 0.05)?	Yes
46720	41062	37681
45779	40915	37573							Bartlett's test
45622	40176	36860							Bartlett's statistic (corrected)	52.36
45400	39816	35844							P value	<0.0001
45308	39497	35393							P value summary	****
45101	39143	35161							Are SDs significantly different (P < 0.05)?	Yes
44919	38893	35110
44625	38586	35091							ANOVA table	SS	DF
44592	38504	34712							Treatment (between columns)	21935994039	2
44484	38474	33761							Residual (within columns)	346390964237	4297
44451	38428	33722							Total	368326958276	4299
44059	38425	33631
43740	38353	33553							Data summary
43714	38269	33496							Number of treatments (columns)	3
43658	38159	33395							Number of values (total)	4300
43275	38130	33391
43035	38094	33289
42563	37647	33035
42309	37575	32995
42193	36946	32933
42020	36933	32679
41926	36566	32528
41918	36505	32340
41852	36145	32320
41501	35925	32158
41320	35885	32015
41275	35863	31823
41143	35770	31784
41139	35505	31647
40971	35320	31481
40893	35254	31453
40712	35067	31451
40373	34780	31281
40224	34713	31265
40220	34232	31191
40067	34214	31117
40048	33966	31105
40002	33881	31080
39838	33879	30930
39774	33847	30849
39627	33593	30622
39451	33570	29932
39377	33570	29823
39372	33550	29533
39334	33518	29415
39316	33433	29406
39239	33297	29386
39187	33246	29268
39090	33148	29196
39073	33130	29135
39044	32969	29106
39040	32966	28867
38904	32881	28638
38726	32798	28572
38676	32742	28359
38527	32623	28313
38458	32586	28248
38373	32498	28210
38316	32459	27986
38054	32428	27684
38048	32359	27680
37802	32342	27651
37640	32160	27553
37270	32147	27541
37120	32087	27358
37086	31882	27328
37081	31872	27320
36885	31827	27112
36835	31815	26899
36822	31774	26860
36806	31735	26694
36770	31602	26532
36762	31533	26514
36758	31408	26456
36754	31381	26454
36654	31006	26427
36592	30997	26418
36543	30862	26163
36462	30589	26049
36445	30541	25892
36313	30464	25804
36235	30310	25803
36206	30292	25535
36055	30245	25453
35936	30157	25451
35814	30106	25394
35779	30046	25299
35751	30022	25289
35742	29984	25289
35661	29878	25209
35653	29829	25192
35609	29777	25101
35568	29741	25083
35552	29595	25033
35517	29543	25033
35513	29542	24914
35483	29502	24857
35317	29419	24836
35309	29307	24689
35235	29194	24531
35124	29158	24452
35108	29125	24375
35086	29124	24343
34969	29087	24263
34806	29070	24060
34760	28939	24026
34428	28883	24006
34296	28763	23963
34049	28759	23901
33926	28713	23899
33728	28526	23881
33720	28480	23860
33589	28440	23818
33489	28376	23817
33479	28285	23806
33342	28279	23770
33142	28276	23694
33137	28260	23691
33123	28203	23666
32896	28172	23648
32853	28120	23499
32818	28110	23388
32733	28048	23088
32694	28024	23003
32651	28011	22962
32601	27984	22948
32582	27933	22930
32545	27924	22859
32510	27867	22815
32468	27676	22712
32327	27667	22706
32244	27663	22695
32078	27660	22683
32037	27589	22663
32016	27544	22633
31976	27473	22547
31895	27408	22460
31884	27357	22455
31879	27332	22310
31872	27274	22095
31815	27263	22047
31759	27251	21887
31719	27219	21870
31549	27180	21869
31521	27086	21810
31516	27025	21783
31515	26907	21766
31442	26872	21613
31442	26846	21611
31403	26796	21520
31398	26786	21477
31289	26783	21313
31211	26701	21283
31161	26656	21242
31156	26640	21218
31135	26575	21216
31089	26491	21169
31022	26425	21151
31015	26420	21139
30993	26398	20958
30984	26307	20904
30910	26307	20871
30847	26295	20793
30747	26252	20763
30552	26237	20694
30539	26164	20676
30481	26157	20610
30476	26128	20573
30437	25959	20542
30401	25945	20537
30359	25892	20353
30328	25865	20343
30257	25808	20335
30159	25797	20291
30153	25779	20281
30088	25778	20275
30083	25772	20255
30057	25719	20225
30012	25671	20189
29916	25659	20152
29883	25632	19975
29825	25606	19899
29812	25602	19862
29778	25582	19747
29755	25573	19724
29710	25504	19724
29696	25490	19705
29617	25440	19689
29545	25421	19668
29502	25420	19658
29449	25325	19644
29443	25260	19567
29417	25209	19562
29405	25181	19535
29345	25061	19500
29321	25033	19495
29217	25030	19493
29210	25020	19471
29189	24944	19432
29182	24923	19415
29158	24851	19401
29108	24836	19373
29038	24748	19328
29012	24715	19322
28950	24696	19321
28918	24664	19305
28839	24656	19200
28724	24628	19190
28723	24623	19004
28510	24597	18955
28481	24525	18892
28481	24522	18800
28466	24511	18799
28458	24439	18776
28435	24367	18744
28387	24326	18671
28269	24292	18591
28263	24292	18590
28234	24257	18586
28222	24136	18567
28180	24116	18548
28169	24068	18544
28115	24064	18470
28094	24050	18450
28009	23961	18417
27977	23845	18378
27929	23796	18365
27924	23762	18306
27883	23747	18276
27883	23699	18206
27863	23690	18158
27838	23643	18136
27830	23580	18065
27766	23470	18050
27746	23463	18039
27628	23440	18001
27626	23430	17969
27602	23365	17955
27544	23330	17948
27539	23257	17943
27522	23248	17913
27482	23230	17887
27463	23203	17882
27463	23203	17725
27429	23128	17678
27386	23106	17541
27380	23103	17539
27355	23095	17534
27285	23062	17406
27189	23023	17345
27144	23008	17286
27142	22985	17240
27120	22980	17231
27114	22975	17229
27099	22968	17208
27059	22953	17158
27041	22953	17140
27033	22908	17094
27020	22851	17088
27012	22810	17056
26881	22805	17046
26866	22763	17039
26833	22707	16997
26827	22704	16956
26798	22685	16870
26795	22637	16843
26768	22547	16764
26742	22518	16740
26705	22516	16608
26640	22472	16524
26638	22446	16520
26634	22435	16517
26610	22397	16514
26598	22396	16451
26562	22330	16440
26538	22329	16431
26510	22302	16370
26474	22294	16308
26454	22254	16299
26452	22226	16245
26443	22220	16163
26350	22216	16158
26348	22215	16127
26318	22206	16103
26285	22186	16074
26278	22181	16043
26267	22153	16029
26232	22150	16013
26224	22108	16001
26218	22082	15933
26144	22070	15927
25984	22057	15922
25933	22044	15919
25889	22041	15713
25821	22038	15706
25762	21991	15565
25760	21990	15512
25728	21971	15506
25706	21927	15389
25656	21917	15352
25644	21822	15276
25598	21801	15254
25452	21783	15241
25441	21774	15234
25432	21756	15225
25338	21745	15218
25265	21743	15213
25251	21738	15193
25227	21711	15166
25224	21709	15143
25195	21672	15140
25194	21663	15123
25181	21612	15065
25170	21581	15013
25169	21576	15010
25154	21545	14997
25147	21536	14993
25105	21525	14967
25099	21474	14943
25069	21443	14894
25049	21443	14884
25020	21433	14881
25000	21367	14871
24905	21363	14866
24890	21343	14856
24770	21291	14810
24756	21259	14752
24744	21254	14726
24732	21253	14649
24698	21204	14648
24689	21098	14633
24671	21061	14592
24651	21034	14569
24616	20985	14537
24613	20980	14532
24577	20974	14524
24539	20952	14434
24518	20949	14410
24508	20947	14371
24491	20942	14365
24478	20876	14353
24444	20864	14261
24436	20862	14199
24435	20855	14129
24371	20843	14082
24351	20821	14025
24330	20742	13989
24286	20732	13983
24281	20716	13971
24267	20715	13925
24262	20703	13882
24222	20674	13875
24206	20662	13829
24190	20645	13792
24185	20629	13787
24161	20610	13747
24147	20601	13728
24141	20593	13708
24126	20548	13696
24123	20536	13676
24119	20531	13645
24097	20530	13644
24089	20527	13555
24075	20519	13554
24049	20498	13536
24030	20463	13499
24019	20433	13479
23986	20420	13456
23971	20415	13436
23967	20391	13436
23862	20389	13425
23852	20365	13418
23826	20347	13407
23798	20347	13403
23774	20189	13401
23749	20175	13354
23738	20152	13341
23717	20131	13317
23700	20124	13285
23689	20114	13274
23684	20112	13261
23628	20110	13257
23578	20064	13251
23577	20045	13197
23561	20004	13192
23554	19998	13151
23512	19984	13148
23482	19954	13140
23480	19949	13106
23464	19941	12991
23459	19926	12983
23458	19913	12894
23450	19899	12846
23407	19877	12843
23407	19856	12840
23370	19842	12809
23368	19836	12792
23364	19829	12734
23363	19828	12706
23359	19825	12643
23335	19796	12608
23287	19789	12468
23275	19769	12466
23242	19764	12451
23234	19764	12440
23222	19763	12433
23210	19736	12379
23169	19728	12335
23163	19715	12317
23159	19703	12294
23154	19647	12278
23146	19636	12264
23144	19553	12232
23140	19527	12225
23124	19506	12203
23122	19496	12136
23117	19493	12111
23066	19481	12102
23044	19481	12098
23042	19479	12076
23002	19470	12063
22984	19448	11998
22965	19439	11988
22915	19435	11939
22901	19423	11930
22900	19421	11928
22886	19408	11905
22869	19399	11901
22835	19362	11879
22824	19332	11870
22803	19319	11847
22793	19315	11839
22776	19304	11826
22774	19298	11821
22774	19278	11811
22763	19224	11785
22664	19216	11735
22664	19207	11709
22656	19184	11693
22650	19135	11692
22642	19127	11686
22622	19097	11643
22611	19049	11616
22601	19018	11615
22589	19002	11613
22443	18982	11594
22415	18978	11573
22407	18971	11551
22398	18956	11532
22355	18908	11529
22320	18883	11505
22319	18879	11494
22315	18875	11464
22298	18872	11446
22297	18869	11443
22293	18843	11422
22285	18843	11396
22281	18842	11329
22245	18811	11302
22235	18790	11264
22232	18785	11236
22232	18783	11217
22212	18779	11197
22210	18777	11184
22209	18735	11164
22176	18721	11159
22176	18707	11155
22160	18649	11097
22156	18643	11080
22134	18629	11062
22097	18514	11041
22080	18513	11023
22078	18500	11018
22068	18485	10952
22028	18484	10936
21985	18468	10934
21980	18440	10932
21976	18430	10926
21964	18427	10901
21931	18378	10884
21911	18331	10881
21885	18328	10853
21866	18283	10839
21854	18274	10828
21838	18265	10824
21810	18252	10819
21794	18245	10807
21793	18245	10778
21762	18244	10766
21748	18243	10754
21738	18239	10681
21685	18186	10660
21667	18171	10660
21659	18155	10657
21650	18151	10646
21642	18146	10608
21588	18140	10564
21554	18134	10545
21503	18121	10483
21456	18109	10456
21454	18109	10445
21440	18106	10443
21432	18102	10421
21401	18071	10410
21399	18055	10392
21394	18049	10373
21383	18021	10349
21369	18013	10344
21331	17983	10339
21316	17947	10279
21313	17943	10238
21241	17938	10227
21236	17935	10225
21234	17904	10182
21192	17885	10146
21149	17872	10119
21126	17804	10105
21117	17801	10082
21071	17788	10058
21047	17761	10047
21030	17732	9945
20991	17718	9937
20983	17707	9926
20950	17696	9901
20860	17690	9858
20858	17615	9855
20850	17590	9847
20808	17576	9838
20803	17570	9835
20775	17562	9825
20760	17558	9774
20738	17554	9769
20701	17543	9766
20686	17536	9679
20658	17500	9663
20623	17495	9662
20622	17494	9623
20613	17489	9597
20613	17453	9582
20608	17447	9576
20584	17423	9570
20583	17422	9459
20536	17421	9451
20500	17409	9444
20498	17408	9440
20490	17406	9426
20481	17404	9397
20464	17398	9380
20440	17394	9375
20427	17382	9374
20418	17376	9369
20387	17372	9351
20380	17372	9341
20379	17359	9330
20379	17350	9306
20378	17343	9304
20359	17316	9292
20339	17300	9277
20315	17257	9257
20299	17205	9237
20296	17204	9226
20282	17189	9218
20254	17187	9202
20250	17168	9178
20210	17139	9154
20196	17129	9151
20132	17109	9135
20127	17097	9094
20125	17081	9085
20108	17072	9081
20104	17068	9061
20066	17047	9050
20058	17035	9033
20044	17033	8965
20040	17032	8957
20022	16941	8951
19996	16932	8950
19930	16930	8943
19924	16927	8937
19922	16917	8912
19919	16909	8912
19919	16902	8901
19916	16896	8884
19915	16838	8857
19913	16823	8846
19890	16819	8821
19860	16805	8818
19859	16805	8800
19810	16785	8782
19807	16767	8780
19786	16752	8778
19755	16750	8733
19697	16749	8678
19685	16695	8675
19679	16692	8668
19669	16678	8656
19645	16665	8654
19616	16637	8607
19584	16634	8607
19562	16632	8602
19541	16629	8597
19505	16614	8581
19504	16609	8566
19482	16599	8554
19480	16564	8545
19457	16562	8526
19438	16541	8522
19435	16491	8506
19418	16468	8497
19405	16459	8438
19383	16433	8420
19380	16430	8396
19373	16415	8388
19347	16408	8370
19341	16404	8355
19337	16376	8325
19328	16320	8297
19314	16304	8258
19301	16292	8246
19240	16287	8243
19232	16283	8241
19202	16281	8230
19186	16278	8180
19173	16231	8172
19083	16229	8143
19077	16179	8132
19070	16171	8130
19068	16166	8117
19043	16164	8104
19038	16139	8088
19027	16118	8079
18990	16114	8067
18975	16113	8034
18954	16096	8029
18954	16068	7988
18941	16068	7984
18935	16051	7979
18924	16018	7959
18918	16004	7943
18908	15984	7930
18888	15976	7923
18855	15962	7917
18844	15961	7916
18843	15948	7889
18833	15941	7863
18800	15919	7833
18796	15918	7825
18785	15913	7815
18731	15889	7777
18722	15868	7769
18702	15862	7757
18670	15843	7741
18640	15825	7733
18566	15822	7725
18549	15792	7717
18549	15790	7717
18490	15789	7677
18477	15785	7638
18475	15780	7625
18462	15779	7588
18462	15778	7559
18437	15774	7523
18434	15767	7501
18431	15728	7496
18411	15720	7475
18402	15719	7462
18400	15694	7453
18380	15691	7430
18365	15650	7430
18355	15641	7422
18351	15637	7416
18326	15635	7410
18324	15634	7407
18323	15632	7356
18311	15617	7351
18305	15616	7344
18293	15610	7341
18288	15580	7325
18284	15578	7304
18283	15555	7297
18263	15550	7288
18259	15539	7270
18256	15531	7261
18246	15531	7223
18234	15514	7219
18208	15499	7212
18188	15498	7174
18179	15484	7133
18173	15483	7089
18127	15481	7042
18119	15479	7029
18109	15468	7022
18076	15462	7010
18051	15452	7005
18038	15437	6991
18037	15430	6991
18031	15413	6986
18027	15403	6975
18020	15393	6959
18009	15363	6957
18001	15350	6934
17959	15347	6929
17945	15333	6915
17924	15328	6896
17923	15295	6894
17916	15281	6873
17879	15275	6861
17853	15272	6858
17821	15270	6856
17818	15256	6845
17769	15224	6842
17764	15209	6840
17716	15185	6836
17692	15183	6810
17690	15135	6800
17665	15124	6794
17663	15107	6786
17656	15064	6785
17651	15064	6761
17590	15054	6742
17582	15019	6735
17573	14989	6733
17565	14967	6727
17562	14934	6723
17555	14926	6694
17552	14891	6672
17519	14884	6669
17518	14882	6654
17511	14865	6642
17507	14857	6624
17503	14853	6616
17463	14813	6596
17459	14803	6587
17459	14756	6568
17448	14743	6567
17445	14742	6548
17430	14740	6535
17428	14715	6532
17425	14713	6524
17402	14705	6522
17398	14697	6517
17373	14680	6516
17370	14675	6501
17359	14667	6486
17349	14652	6480
17330	14649	6462
17321	14636	6446
17300	14616	6426
17276	14614	6416
17260	14599	6412
17248	14596	6400
17246	14588	6396
17245	14576	6392
17243	14575	6387
17193	14531	6373
17189	14524	6369
17105	14505	6360
17087	14478	6355
17079	14474	6316
17070	14437	6310
17063	14435	6293
17028	14426	6292
17027	14409	6287
16948	14408	6286
16927	14400	6282
16919	14383	6279
16915	14379	6253
16910	14372	6253
16907	14352	6245
16903	14339	6237
16883	14326	6218
16875	14317	6198
16859	14316	6169
16821	14304	6165
16814	14299	6134
16798	14273	6122
16795	14267	6117
16776	14264	6094
16752	14249	6087
16717	14239	6083
16684	14214	6062
16681	14207	6047
16681	14202	6038
16679	14188	6030
16649	14188	6028
16648	14179	6021
16646	14169	6014
16621	14113	6008
16613	14104	5973
16613	14101	5970
16611	14083	5961
16606	14083	5957
16606	14075	5948
16582	14059	5946
16580	14042	5937
16548	14031	5926
16546	14028	5915
16543	14018	5906
16522	14005	5883
16513	13992	5873
16502	13989	5844
16494	13986	5826
16473	13962	5822
16471	13960	5814
16468	13955	5810
16463	13946	5805
16461	13928	5777
16442	13925	5767
16441	13920	5766
16435	13916	5756
16423	13913	5711
16417	13911	5702
16406	13876	5672
16400	13870	5664
16396	13869	5659
16359	13868	5643
16354	13860	5639
16323	13854	5635
16319	13849	5630
16290	13839	5607
16264	13837	5587
16203	13821	5585
16202	13818	5572
16187	13815	5554
16166	13808	5498
16162	13764	5495
16134	13759	5476
16095	13720	5476
16071	13690	5472
16058	13688	5457
16044	13680	5417
16035	13666	5409
16024	13664	5376
16018	13658	5374
16011	13655	5373
15995	13649	5357
15993	13633	5355
15986	13632	5352
15963	13620	5346
15963	13616	5328
15957	13606	5304
15955	13601	5294
15939	13557	5292
15933	13549	5280
15928	13547	5273
15920	13543	5263
15919	13536	5259
15913	13528	5255
15896	13518	5238
15892	13509	5236
15871	13507	5233
15867	13499	5226
15862	13476	5225
15852	13475	5170
15849	13453	5168
15840	13444	5161
15821	13436	5150
15772	13434	5145
15761	13425	5143
15743	13403	5131
15724	13381	5126
15718	13371	5078
15716	13369	5074
15636	13350	5066
15618	13342	5056
15606	13316	5052
15566	13301	5036
15539	13250	5033
15536	13240	5025
15514	13237	5014
15513	13231	5010
15499	13218	5010
15473	13199	4969
15459	13127	4951
15451	13089	4940
15446	13071	4916
15435	13027	4912
15432	13024	4903
15421	12984	4892
15397	12978	4873
15377	12972	4870
15370	12953	4867
15359	12934	4855
15327	12900	4849
15303	12866	4845
15303	12865	4839
15268	12864	4834
15252	12859	4832
15243	12835	4829
15200	12830	4826
15187	12789	4822
15184	12787	4814
15173	12784	4780
15169	12729	4777
15098	12701	4776
15092	12695	4773
15091	12680	4766
15091	12660	4766
15084	12653	4758
15068	12628	4743
15064	12622	4730
15044	12614	4726
15028	12605	4715
15021	12593	4695
15021	12581	4676
14976	12579	4668
14968	12576	4655
14951	12571	4645
14926	12540	4632
14903	12526	4623
14899	12515	4621
14890	12513	4614
14852	12499	4574
14851	12485	4571
14851	12475	4564
14837	12468	4557
14835	12460	4548
14828	12448	4516
14822	12447	4514
14747	12444	4514
14733	12426	4483
14730	12417	4478
14695	12414	4474
14673	12392	4464
14672	12388	4451
14629	12355	4445
14617	12343	4434
14605	12317	4394
14569	12314	4366
14560	12273	4354
14556	12269	4313
14549	12259	4308
14549	12223	4298
14515	12210	4276
14512	12207	4275
14511	12204	4263
14508	12200	4261
14494	12174	4252
14483	12174	4251
14478	12174	4211
14471	12173	4196
14400	12172	4195
14373	12151	4180
14363	12137	4163
14345	12132	4162
14321	12131	4136
14320	12115	4115
14314	12103	4107
14306	12088	4106
14292	12087	4102
14284	12068	4097
14271	12051	4063
14238	12051	4058
14234	12045	4041
14226	12030	4027
14223	12027	3998
14221	12015	3991
14210	11996	3983
14202	11992	3971
14183	11988	3963
14164	11944	3940
14154	11944	3919
14151	11940	3909
14136	11913	3898
14133	11900	3877
14131	11888	3874
14125	11879	3866
14112	11871	3862
14109	11864	3861
14079	11821	3850
14061	11802	3845
14044	11791	3843
14005	11779	3798
14000	11763	3798
14000	11750	3775
13984	11738	3770
13947	11719	3768
13939	11708	3756
13925	11704	3754
13900	11686	3723
13893	11657	3718
13870	11655	3717
13864	11645	3712
13849	11630	3694
13827	11595	3692
13817	11591	3692
13799	11583	3686
13792	11582	3667
13768	11574	3662
13768	11565	3660
13766	11557	3653
13752	11552	3632
13734	11545	3608
13733	11537	3592
13714	11535	3580
13675	11528	3574
13613	11526	3570
13596	11520	3565
13594	11507	3544
13569	11500	3539
13556	11471	3524
13544	11469	3482
13543	11464	3478
13534	11444	3473
13522	11421	3468
13521	11413	3457
13518	11403	3444
13515	11397	3408
13496	11354	3403
13486	11341	3403
13485	11338	3385
13484	11335	3381
13481	11328	3378
13461	11314	3355
13454	11313	3345
13452	11293	3334
13437	11280	3326
13425	11257	3324
13420	11207	3323
13406	11191	3313
13400	11184	3286
13388	11179	3270
13384	11176	3257
13382	11173	3225
13337	11132	3224
13291	11127	3218
13278	11091	3216
13273	11090	3159
13260	11083	3134
13241	11076	3101
13222	11070	3086
13216	11056	3085
13197	11053	3080
13182	11050	3065
13181	11038	3064
13158	11037	3060
13151	11007	3036
13150	10965	2998
13146	10962	2993
13145	10955	2978
13126	10953	2946
13121	10943	2943
13113	10921	2942
13095	10920	2924
13077	10900	2915
13044	10882	2915
13041	10842	2886
13035	10815	2880
13022	10795	2876
13017	10788	2862
13005	10786	2861
12998	10779	2847
12969	10748	2841
12968	10691	2839
12966	10663	2837
12935	10663	2824
12928	10660	2818
12919	10659	2809
12919	10653	2800
12884	10645	2774
12879	10641	2770
12877	10634	2750
12865	10632	2749
12862	10605	2740
12861	10596	2711
12839	10591	2666
12823	10591	2649
12817	10549	2616
12816	10532	2571
12795	10524	2566
12794	10514	2544
12781	10513	2542
12777	10489	2492
12753	10475	2486
12746	10458	2479
12740	10443	2472
12714	10439	2460
12711	10428	2459
12667	10380	2395
12664	10375	2392
12661	10371	2387
12659	10368	2362
12635	10357	2317
12630	10340	2305
12624	10337	2302
12619	10303	2271
12617	10282	2258
12590	10258	2226
12565	10237	2177
12559	10192	2176
12555	10183	2150
12552	10157	2147
12550	10114	2092
12529	10101	2087
12463	10068	2051
12458	10067	2046
12454	10019	2042
12446	10018	1982
12443	10009	1954
12442	9994	1944
12433	9984	1927
12389	9967	1859
12371	9954	1853
12360	9911	1834
12346	9898	1816
12345	9882	1762
12341	9879	1760
12309	9879	1750
12306	9876	1745
12306	9854	1731
12302	9849	1716
12288	9845	1712
12279	9845	1670
12275	9839	1547
12272	9821	1450
12260	9805	1439
12247	9747	1439
12220	9746	1425
12206	9734	1386
12205	9729	1259
12160	9715	1224
12148	9696	1047
12141	9696	949
12138	9688	680
12128	9678	501
12104	9677	465
12095	9670
12091	9660
12087	9643
12079	9564
12074	9563
12056	9547
12053	9531
12052	9512
12025	9496
12023	9480
11995	9475
11982	9461
11952	9421
11915	9395
11906	9387
11864	9379
11845	9375
11823	9323
11802	9320
11787	9307
11786	9307
11781	9303
11767	9292
11767	9213
11754	9179
11734	9176
11689	9149
11654	9137
11619	9134
11615	9128
11597	9124
11593	9098
11579	9085
11555	9082
11555	9054
11547	9022
11542	9013
11529	9012
11524	9006
11499	8989
11469	8940
11454	8937
11449	8894
11447	8892
11447	8889
11443	8882
11440	8870
11411	8862
11407	8855
11397	8855
11387	8836
11381	8830
11379	8815
11336	8803
11310	8789
11290	8785
11286	8762
11274	8759
11254	8758
11244	8756
11237	8754
11232	8731
11226	8716
11175	8712
11173	8669
11165	8579
11146	8563
11096	8544
11091	8532
11089	8489
11083	8431
11072	8384
11067	8368
11064	8335
11061	8333
11059	8315
11027	8299
11027	8294
11025	8292
11018	8258
11009	8246
10995	8231
10985	8226
10980	8220
10974	8200
10973	8195
10973	8161
10971	8119
10960	8111
10960	8091
10953	8088
10905	8084
10854	8069
10853	8017
10838	8013
10825	8011
10825	8007
10820	7999
10797	7990
10790	7968
10789	7967
10768	7952
10728	7948
10725	7936
10725	7919
10711	7911
10708	7899
10708	7893
10698	7891
10693	7882
10663	7843
10649	7841
10642	7841
10624	7827
10601	7816
10591	7813
10576	7810
10563	7808
10562	7799
10560	7796
10555	7787
10553	7707
10542	7684
10541	7636
10520	7633
10511	7629
10510	7599
10489	7541
10476	7536
10474	7533
10427	7528
10420	7516
10401	7510
10392	7501
10367	7489
10361	7486
10350	7471
10313	7452
10293	7426
10282	7419
10279	7374
10254	7346
10246	7315
10240	7305
10222	7290
10215	7279
10197	7225
10191	7185
10181	7176
10163	7174
10108	7160
10103	7135
10091	7122
10052	7109
10039	7105
10034	7078
10034	7045
10018	7033
10014	7020
9998	7018
9996	7006
9982	6989
9965	6980
9963	6923
9954	6903
9946	6892
9938	6879
9910	6863
9905	6838
9903	6833
9891	6744
9889	6737
9887	6596
9874	6585
9865	6577
9850	6570
9821	6569
9798	6551
9785	6453
9761	6452
9740	6434
9731	6429
9729	6423
9698	6396
9686	6384
9682	6363
9681	6358
9675	6347
9656	6320
9644	6286
9636	6237
9633	6221
9619	6206
9618	6196
9605	6193
9584	6179
9577	6157
9572	6130
9543	6128
9542	6031
9526	6019
9506	6003
9504	5984
9502	5944
9456	5899
9434	5853
9423	5848
9415	5846
9407	5822
9393	5802
9387	5784
9386	5767
9372	5748
9344	5744
9343	5693
9304	5513
9274	5496
9255	5482
9249	5425
9207	5405
9198	5393
9188	5389
9187	5366
9157	5339
9139	5333
9134	5299
9120	5255
9110	5239
9109	5237
9106	5194
9102	5187
9099	5180
9093	5169
9080	5159
9040	5104
9026	4923
8996	4911
8996	4908
8995	4763
8958	4727
8928	4697
8916	4664
8895	4418
8895	4405
8874	4290
8874	4111
8856	4109
8825	4016
8817	3987
8793	3836
8784	3807
8771	3409
8758	3377
8750	3321
8749	3302
8715	2947
8702	2915
8674	2715
8674	2679
8662	2356
8658	1796
8653	1585
8649	1098
8643
8638
8608
8588
8569
8553
8535
8525
8523
8523
8479
8457
8431
8425
8412
8411
8394
8344
8321
8297
8292
8291
8289
8277
8241
8213
8213
8208
8203
8202
8202
8192
8191
8188
8183
8169
8155
8123
8120
8105
8096
8072
8062
8051
8035
8034
8030
8018
8005
7988
7985
7978
7961
7955
7942
7940
7937
7920
7909
7903
7881
7880
7879
7864
7862
7849
7846
7845
7839
7838
7827
7823
7813
7806
7804
7787
7784
7764
7760
7750
7733
7730
7727
7727
7711
7697
7686
7684
7670
7657
7645
7642
7640
7637
7635
7630
7629
7627
7621
7612
7606
7595
7593
7573
7564
7561
7542
7540
7539
7522
7513
7491
7490
7482
7480
7455
7450
7448
7444
7442
7409
7397
7390
7375
7368
7341
7338
7326
7306
7295
7291
7286
7279
7233
7207
7169
7169
7168
7136
7108
7068
7021
6990
6969
6929
6926
6920
6903
6875
6864
6863
6844
6834
6827
6817
6806
6798
6789
6725
6723
6721
6693
6688
6657
6604
6593
6583
6575
6562
6557
6548
6542
6517
6514
6512
6510
6486
6471
6471
6463
6445
6415
6384
6355
6352
6341
6338
6294
6286
6270
6218
6200
6192
6182
6177
6159
6138
6112
6075
6043
6017
5996
5989
5980
5943
5892
5892
5887
5871
5858
5856
5812
5797
5764
5761
5760
5732
5721
5719
5713
5711
5668
5655
5649
5642
5577
5565
5559
5550
5530
5511
5469
5424
5419
5390
5373
5337
5329
5319
5317
5307
5279
5232
5218
5203
5190
5189
5184
5123
5106
5092
5086
5084
5036
5034
4933
4930
4895
4879
4869
4865
4863
4844
4837
4826
4808
4805
4785
4737
4735
4721
4717
4697
4695
4643
4641
4639
4609
4576
4567
4563
4507
4504
4488
4482
4462
4439
4341
4335
4308
4306
4256
4221
4204
4130
4127
4060
4048
4036
4031
4010
3945
3940
3915
3861
3805
3752
3699
3662
3629
3613
3605
3566
3530
3518
3413
3295
3285
3155
3099
3070
3034
2852
2747
2683
2659
2628
2606
2602
2565
2560
2551
2522
2503
2445
2389
2362
2305
2290
2280
2256
2246
2117
1938
1884
1635
1513
1165
1132
904
848
800
604
437

## Sheet: Figure 4G
Evoked Peak Current (nA)				DESCRIPTIVE STATISTICS				T Test
Control	BRPdef/+				Control	BRPdef/+		Table Analyzed	TEVC
25.0778	28.3018			Number of values	11	13
31.4235	34.1626							Column B	BRPdef/+
30.1807	30.9977			Minimum	14.6	5.852		vs.	vs.
26.7232	25.6606			25% Percentile	25.08	23.03		Column A	Control
33.2443	26.7854			Median	28.28	27.44
29.3401	34.5743			75% Percentile	30.18	34.37		Unpaired t test
25.9793	22.2061			Maximum	33.24	54.58		P value	0.6079
19.865	27.4446			Range	18.64	48.72		P value summary	ns
28.2804	5.85189							Significantly different (P < 0.05)?	No
14.6025	23.8607			Mean	26.78	28.71		One- or two-tailed P value?	Two-tailed
29.8904	38.3807			Std. Deviation	5.413	11.19		t, df	t=0.5206, df=22
	20.4247			Std. Error of Mean	1.632	3.105
	54.5757							How big is the difference?
								Mean of column A	26.78
								Mean of column B	28.71
								Difference between means (B - A) ± SEM	1.927 ± 3.702
								95% confidence interval	-5.751 to 9.605
								R squared (eta squared)	0.01217
								F test to compare variances
								F, DFn, Dfd	4.276, 12, 10
								P value	0.0282
								P value summary	*
								Significantly different (P < 0.05)?	Yes
								Data analyzed
								Sample size, column A	11
								Sample size, column B	13
