# Supplementary material for: Regulation of presynaptic Ca2+ channel abundance at active zones through a balance of delivery and turnover
Source: eLife. 2022 Jul 14;11:e78648. doi: 10.7554/eLife.78648 (PMC9352347; doi:10.7554/eLife.78648)
Supplement: Figure 5—figure supplement 1—source data 1. [file elife-78648-fig5-figsupp1-data1.xlsx]

## Sheet: Figure 5S1B
HRP Area				DESCRIPTIVE STATISTICS					ANOVA						Multiple comparisons
control	a2d2/+	a2d2/k10814			control	a2d2/+	a2d2/k10814		Table Analyzed	HRP Area					Number of families	1
214.155	162.071	164.992		Number of values	10	11	11		Data sets analyzed	A-C					Number of comparisons per family	2
111.239	259.104	171.931													Alpha	0.05
212.032	213.169	185.601		Minimum	111.2	162.1	126.5		ANOVA summary
260.627	188.596	149.577		25% Percentile	194	188.6	149.9		F	7.832					Šídák's multiple comparisons test	Mean Diff.	95.00% CI of diff.	Below threshold?	Summary	Adjusted P Value	A-?
255.678	224.127	152.592		Median	221.6	224.1	158.2		P value	0.0019					control vs. a2d2/+	-0.3287	-37.04 to 36.39	No	ns	0.9997	B	a2d2/+
189.318	264.511	126.521		75% Percentile	256.9	244.9	185.6		P value summary	**					control vs. a2d2/k10814	52.31	15.60 to 89.03	Yes	**	0.0044	C	a2d2/k10814
261.177	222.534	156.82		Maximum	261.2	264.5	212.8		Significant diff. among means (P < 0.05)?	Yes
254.294	229.227	158.204		Range	149.9	102.4	86.23		R squared	0.3507					Test details	Mean 1	Mean 2	Mean Diff.	SE of diff.	n1	n2	t	DF
229.02	166.942	197.11													control vs. a2d2/+	218.3	218.6	-0.3287	15.57	10	11	0.02111	29
195.574	244.908	149.861		Mean	218.3	218.6	166		Brown-Forsythe test						control vs. a2d2/k10814	218.3	166	52.31	15.57	10	11	3.36	29
	229.852	212.752		Std. Deviation	46.32	33.94	24.47		F (DFn, DFd)	1.200 (2, 29)
				Std. Error of Mean	14.65	10.23	7.378		P value	0.3157
									P value summary	ns
									Are SDs significantly different (P < 0.05)?	No
									Bartlett's test
									Bartlett's statistic (corrected)	3.6
									P value	0.1653
									P value summary	ns
									Are SDs significantly different (P < 0.05)?	No
									ANOVA table	SS	DF	MS	F (DFn, DFd)	P value
									Treatment (between columns)	19887	2	9944	F (2, 29) = 7.832	P=0.0019
									Residual (within columns)	36820	29	1270
									Total	56707	31
									Data summary
									Number of treatments (columns)	3
									Number of values (total)	32

## Sheet: Figure 5S1C
AZ Number				DESCRIPTIVE STATISTICS					ANOVA						MULTIPLE COMPARISONS
control	a2d2/+	a2d2/k10814			control	a2d2/+	a2d2/k10814		Table Analyzed	AZ Number					Number of families	1
331	258	252		Number of values	10	11	11		Data sets analyzed	A-C					Number of comparisons per family	2
181	392	284													Alpha	0.05
349	266	259		Minimum	181	221	197		ANOVA summary
323	305	267		25% Percentile	318.3	266	239		F	7.591					Šídák's multiple comparisons test	Mean Diff.	95.00% CI of diff.	Below threshold?	Summary	Adjusted P Value	A-?
337	313	242		Median	337.5	305	252		P value	0.0022					control vs. a2d2/+	26.62	-20.19 to 73.43	No	ns	0.3444	B	a2d2/+
304	327	197		75% Percentile	363.8	327	267		P value summary	**					control vs. a2d2/k10814	75.8	28.99 to 122.6	Yes	**	0.0013	C	a2d2/k10814
369	341	257		Maximum	394	392	313		Significant diff. among means (P < 0.05)?	Yes
394	315	222		Range	213	171	116		R squared	0.3436					Test details	Mean 1	Mean 2	Mean Diff.	SE of diff.	n1	n2	t	DF
362	221	313													control vs. a2d2/+	328.8	302.2	26.62	19.85	10	11	1.341	29
338	286	239		Mean	328.8	302.2	253		Brown-Forsythe test						control vs. a2d2/k10814	328.8	253	75.8	19.85	10	11	3.819	29
	300	251		Std. Deviation	57.76	45.38	30.38		F (DFn, DFd)	0.4728 (2, 29)
				Std. Error of Mean	18.27	13.68	9.159		P value	0.628
									P value summary	ns
									Are SDs significantly different (P < 0.05)?	No
									Bartlett's test
									Bartlett's statistic (corrected)	3.582
									P value	0.1668
									P value summary	ns
									Are SDs significantly different (P < 0.05)?	No
									ANOVA table	SS	DF	MS	F (DFn, DFd)	P value
									Treatment (between columns)	31332	2	15666	F (2, 29) = 7.591	P=0.0022
									Residual (within columns)	59853	29	2064
									Total	91186	31
									Data summary
									Number of treatments (columns)	3
									Number of values (total)	32

## Sheet: Figure 5S1E
Average AZ Cac					Descriptive statistics						ANOVA						Multiple comparisons
Control Seg 1/2	Control Seg 5/6	a2d null Seg 1/2	a2d null Seg 5/6			Control Seg 1/2	Control Seg 5/6	a2d null Seg 1/2	a2d null Seg 5/6		Table Analyzed	Data 1
18910	19611	7571	6322		Number of values	12	8	12	8		Data sets analyzed	A-D					Number of families	1
19336	15869	4995	3940														Number of comparisons per family	2
16193	16699	4348	4497		Minimum	14650	15869	3806	3940		ANOVA summary						Alpha	0.05
15575	22183	7289	10224		25% Percentile	15966	17135	4789	4953		F	135.4
16794	18441	4769	6542		Median	17208	19428	5538	6688		P value	<0.0001					Šídák's multiple comparisons test	Mean Diff.	95.00% CI of diff.	Below threshold?	Summary	Adjusted P Value
15890	19922	6103	6833		75% Percentile	18887	21137	7253	9412		P value summary	****					Control Seg 1/2 vs. Control Seg 5/6	-1742	-3736 to 252.4	No	ns	0.0955	A-B
20119	19244	4849	10630		Maximum	20119	22183	8059	10630		Significant diff. among means (P < 0.05)?	Yes					a2d null Seg 1/2 vs. a2d null Seg 5/6	-1161	-3156 to 832.8	No	ns	0.3318	C-D
17227	21542	7145	6976		Range	5469	6314	4253	6690		R squared	0.9186
18816		3806															Test details	Mean 1	Mean 2	Mean Diff.	SE of diff.	n1	n2	t	DF
14650		5393			Mean	17447	19189	5834	6996		Brown-Forsythe test						Control Seg 1/2 vs. Control Seg 5/6	17447	19189	-1742	854.6	12	8	2.038	36
17189		8059			Std. Deviation	1708	2171	1389	2387		F (DFn, DFd)	0.4585 (3, 36)					a2d null Seg 1/2 vs. a2d null Seg 5/6	5834	6996	-1161	854.6	12	8	1.359	36
18666		5682			Std. Error of Mean	492.9	767.7	401	844.1		P value	0.713
											P value summary	ns
											Are SDs significantly different (P < 0.05)?	No
											Bartlett's test
											Bartlett's statistic (corrected)	2.972
											P value	0.3959
											P value summary	ns
											Are SDs significantly different (P < 0.05)?	No
											ANOVA table	SS	DF	MS	F (DFn, DFd)	P value
											Treatment (between columns)	1424112874	3	474704291	F (3, 36) = 135.4	P<0.0001
											Residual (within columns)	126195447	36	3505429
											Total	1550308321	39
											Data summary
											Number of treatments (columns)	4
											Number of values (total)	40
