# Supplementary material for: Regulation of presynaptic Ca2+ channel abundance at active zones through a balance of delivery and turnover
Source: eLife. 2022 Jul 14;11:e78648. doi: 10.7554/eLife.78648 (PMC9352347; doi:10.7554/eLife.78648)
Supplement: Figure 5—source data 1. [file elife-78648-fig5-data1.xlsx]

## Sheet: Figure 5B
Average AZ Cac				DESCRIPTIVE STATISTICS					ANOVA					MULTIPLE COMPARISONS
control	a2d2/+	a2d2/k10814			control	a2d2/+	a2d2/k10814		Table Analyzed	Avg AZ Cac (NMJs) a2d het and null				Number of families	1
22081	14132	6010		Number of values	10	11	11		Data sets analyzed	A-C				Number of comparisons per family	2
18652	12752	7234												Alpha	0.05
17952	17311	6009		Minimum	15564	6245	4416		ANOVA summary
16035	19135	11262		25% Percentile	15986	14132	5759		F	59.65				Šídák's multiple comparisons test	Mean Diff.	95.00% CI of diff.	Below threshold?	Summary	Adjusted P Value	A-?
18190	15006	7624		Median	18071	15035	6010		P value	<0.0001				control vs. a2d2/+	3081	497.3 to 5665	Yes	*	0.0174	B	a2d2/+
20214	15726	5762		75% Percentile	19043	17091	7234		P value summary	****				control vs. a2d2/k10814	11465	8881 to 14048	Yes	****	<0.0001	C	a2d2/k10814
15564	17091	6572		Maximum	22081	19135	11262		Significant diff. among means (P < 0.05)?	Yes
15840	14912	5759		Range	6517	12890	6846		R squared	0.8045				Test details	Mean 1	Mean 2	Mean Diff.	SE of diff.	n1	n2	t	DF
18219	6245	5193												control vs. a2d2/+	18007	14926	3081	1096	10	11	2.812	29
17324	15035	6126		Mean	18007	14926	6542		Brown-Forsythe test					control vs. a2d2/k10814	18007	6542	11465	1096	10	11	10.46	29
	16842	4416		Std. Deviation	2027	3364	1795		F (DFn, DFd)	0.8375 (2, 29)
				Std. Error of Mean	641.1	1014	541.3		P value	0.443
									P value summary	ns
									Are SDs significantly different (P < 0.05)?	No
									Bartlett's test
									Bartlett's statistic (corrected)	4.433
									P value	0.109
									P value summary	ns
									Are SDs significantly different (P < 0.05)?	No
									ANOVA table	SS
									Treatment (between columns)	750215836
									Residual (within columns)	182352577
									Total	932568413
									Data summary
									Number of treatments (columns)	3
									Number of values (total)	32

## Sheet: Figure 5E
TEVC Evoked Peak Current (nA)				DESCRIPTIVE STATISTICS					ANOVA						MULTIPLE COMPARISONS
Control	a2d2/+	a2d2/k10814			Control	a2d2/+	a2d2/k10814		Table Analyzed	TEVC peak current het and null
25.8706	17.9967	14.0613		Number of values	9	13	8		Data sets analyzed	A-C					Number of families	1
26.9413	19.2748	12.116													Number of comparisons per family	2
44.5253	18.2529	5.82382		Minimum	25.87	5.343	4.978		ANOVA summary						Alpha	0.05
47.0845	16.5583	13.3201		25% Percentile	32.83	18.12	5.936		F	22.89
38.7249	19.5089	4.97827		Median	42.39	19.51	8.359		P value	<0.0001					Šídák's multiple comparisons test	Mean Diff.	95.00% CI of diff.	Below threshold?	Summary	Adjusted P Value	A-?
42.1214	24.1291	9.27293		75% Percentile	45.86	32.14	13.02		P value summary	****					Control vs. a2d2/+	17.44	7.163 to 27.71	Yes	***	0.0008	B	a2d2/+
42.3872	48.5574	6.27283		Maximum	65.38	48.56	14.06		Significant diff. among means (P < 0.05)?	Yes					Control vs. a2d2/k10814	32.8	21.29 to 44.32	Yes	****	<0.0001	C	a2d2/k10814
44.6359	39.3217	7.44589		Range	39.51	43.21	9.083		R squared	0.6291
65.3805	18.6392														Test details	Mean 1	Mean 2	Mean Diff.	SE of diff.	n1	n2	t	DF
	5.34291			Mean	41.96	24.53	9.161		Brown-Forsythe test						Control vs. a2d2/+	41.96	24.53	17.44	4.34	9	13	4.018	27
	29.7316			Std. Deviation	11.64	11.29	3.585		F (DFn, DFd)	1.250 (2, 27)					Control vs. a2d2/k10814	41.96	9.161	32.8	4.863	9	8	6.745	27
	34.5451			Std. Error of Mean	3.879	3.133	1.268		P value	0.3025
	26.97								P value summary	ns
									Are SDs significantly different (P < 0.05)?	No
									Bartlett's test
									Bartlett's statistic (corrected)	8.605
									P value	0.0135
									P value summary	*
									Are SDs significantly different (P < 0.05)?	Yes
									ANOVA table	SS	DF	MS	F (DFn, DFd)	P value
									Treatment (between columns)	4587	2	2293	F (2, 27) = 22.89	P<0.0001
									Residual (within columns)	2704	27	100.2
									Total	7291	29
									Data summary
									Number of treatments (columns)	3
									Number of values (total)	30

## Sheet: Figure 5G
Average AZ Cac (ALL AZs)			DESCRIPTIVE STATISTICS				T TEST
Control (all AZs)	a2d OE (all AZs)			Control (all AZs)	a2d OE (all AZs)		Table Analyzed	Data 1
9537.36	11945.7		Number of values	10	12
11696.3	9282.23						Column D	a2d OE (all AZs)
8377.47	10483.5		Minimum	7988	9282		vs.	vs.
9302.45	10621.6		25% Percentile	8314	10518		Column C	Control (all AZs)
8629.84	12309.4		Median	9254	11311
11141.4	14316.3		75% Percentile	9938	12393		Unpaired t test
8125.1	10913.2		Maximum	11696	14316		P value	0.0019
9206.29	13750.6		Range	3708	5034		P value summary	**
7987.85	11420.3						Significantly different (P < 0.05)?	Yes
9311.55	12420.8		Mean	9332	11497		One- or two-tailed P value?	Two-tailed
	11202.4		Std. Deviation	1229	1558		t, df	t=3.563, df=20
	9299.47		Std. Error of Mean	388.6	449.8
							How big is the difference?
							Mean of column C	9332
							Mean of column D	11497
							Difference between means (D - C) ± SEM	2166 ± 607.8
							95% confidence interval	897.8 to 3433
							R squared (eta squared)	0.3883
							F test to compare variances
							F, DFn, Dfd	1.608, 11, 9
							P value	0.4851
							P value summary	ns
							Significantly different (P < 0.05)?	No
							Data analyzed
							Sample size, column C	10
							Sample size, column D	12

## Sheet: Figure 5H
Average AZ Cac (Top 20 AZs)			DESCRIPTIVE STATISTICS				T TEST
Control (top 20)	a2d OE (top 20)			Control (top 20)	a2d OE (top 20)		Table Analyzed	Data 1
23530.6	24813.1		Number of values	10	12
28664	22387.9						Column F	a2d OE (top 20)
21590.5	21620		Minimum	20199	20559		vs.	vs.
22255.8	21164.3		25% Percentile	21333	21812		Column E	Control (top 20)
21233	27001.6		Median	22601	24821
24269.5	33743.7		75% Percentile	23994	26090		Unpaired t test
20198.8	25116.7		Maximum	28664	33744		P value	0.1749
23902.1	26189.8		Range	8465	13185		P value summary	ns
21366.8	25789.8						Significantly different (P < 0.05)?	No
22946.3	24828.8		Mean	22996	24832		One- or two-tailed P value?	Two-tailed
	20558.8		Std. Deviation	2380	3503		t, df	t=1.407, df=20
	24773.5		Std. Error of Mean	752.5	1011
							How big is the difference?
							Mean of column E	22996
							Mean of column F	24832
							Difference between means (F - E) ± SEM	1837 ± 1306
							95% confidence interval	-886.7 to 4560
							R squared (eta squared)	0.09004
							F test to compare variances
							F, DFn, Dfd	2.167, 11, 9
							P value	0.2556
							P value summary	ns
							Significantly different (P < 0.05)?	No
							Data analyzed
							Sample size, column E	10
							Sample size, column F	12

## Sheet: Figure 5J
Evoked Peak Current					DESCRIPTIVE STATISTICS						ANOVA						MULTIPLE COMPARISONS
Stim 1 (Control)	Stim 1 (a2d OE)	Stim 5 (Control)	Stim 5 (a2d OE)			Stim 1 (Control)	Stim 1 (a2d OE)	Stim 5 (Control)	Stim 5 (a2d OE)		Table Analyzed	a2d OE 1st vs 5th stimulus TEVC					Number of families	1
23.5063	14.7331	57.0289	48.0603		Number of values	11	11	11	11		Data sets analyzed	A-D					Number of comparisons per family	2
23.1494	27.064	52.173	69.4927														Alpha	0.05
9.71985	13.418	30.1966	42.8841		Minimum	9.72	8.12	30.2	37.79		ANOVA summary
12.6979	35.8747	54.5862	84.1995		25% Percentile	12.7	13.42	40.42	45.81		F	32.49					Šídák's multiple comparisons test	Mean Diff.	95.00% CI of diff.	Below threshold?	Summary	Adjusted P Value
27.8758	17.961	46.645	47.2559		Median	23.15	22.14	46.64	55.84		P value	<0.0001					Stim 1 (Control) vs. Stim 1 (a2d OE)	-2.586	-13.60 to 8.425	No	ns	0.8305	A-B
26.1002	22.1379	48.6325	55.8411		75% Percentile	25.68	32.17	54.59	72.25		P value summary	****					Stim 5 (Control) vs. Stim 5 (a2d OE)	-12.39	-23.40 to -1.377	Yes	*	0.0249	C-D
25.6785	9.35822	61.6295	45.8078		Maximum	27.88	35.87	61.63	84.2		Significant diff. among means (P < 0.05)?	Yes
15.3748	8.11971	44.2202	37.7945		Range	18.16	27.75	31.43	46.41		R squared	0.709					Test details	Mean 1	Mean 2	Mean Diff.	SE of diff.	n1	n2	t	DF
17.5581	35.835	36.7039	79.499														Stim 1 (Control) vs. Stim 1 (a2d OE)	19.87	22.45	-2.586	4.739	11	11	0.5457	40
11.8776	30.3365	42.7595	72.2533		Mean	19.87	22.45	46.82	59.21		Brown-Forsythe test						Stim 5 (Control) vs. Stim 5 (a2d OE)	46.82	59.21	-12.39	4.739	11	11	2.614	40
25.0203	32.1655	40.4168	68.1769		Std. Deviation	6.565	10.37	9.267	16.05		F (DFn, DFd)	4.269 (3, 40)
					Std. Error of Mean	1.98	3.127	2.794	4.839		P value	0.0105
											P value summary	*
											Are SDs significantly different (P < 0.05)?	Yes
											Bartlett's test
											Bartlett's statistic (corrected)	7.872
											P value	0.0487
											P value summary	*
											Are SDs significantly different (P < 0.05)?	Yes
											ANOVA table	SS	DF	MS	F (DFn, DFd)	P value
											Treatment (between columns)	12039	3	4013	F (3, 40) = 32.49	P<0.0001
											Residual (within columns)	4941	40	123.5
											Total	16980	43
											Data summary
											Number of treatments (columns)	4
											Number of values (total)	44

## Sheet: Figure 5L
Average AZ Cac					DESCRIPTIVE STATISTICS						ANOVA							MULTIPLE COMPARISONS
CACGFP	CACGFP/DF	CacGFP;a2dOE	CacGFP/DF;a2dOE			CACGFP	CACGFP/DF	CacGFP;a2dOE	CacGFP/DF;a2dOE		Table Analyzed	Data 1
14709	12816	10507	15588		Number of values	19	20	15	12		Data sets analyzed	A-D						Number of families	1
16628	14194	19339	11466															Number of comparisons per family	2
14571	13773	13532	14418		Minimum	11831	10282	10507	11466		ANOVA summary							Alpha	0.05
14466	15320	19568	17839		25% Percentile	13768	12632	14799	13067		F	6.985
16362	15156	19604	15593		Median	14824	13885	17869	15265		P value	0.0004						Šídák's multiple comparisons test	Mean Diff.	95.00% CI of diff.	Below threshold?	Summary	Adjusted P Value
14198	11715	15678	17520		75% Percentile	16362	14978	19568	16304		P value summary	***						CACGFP vs. CacGFP;a2dOE	-2037	-3826 to -248.4	Yes	*	0.0225	A-C
16020	12774	17869	16302		Maximum	19370	16160	21349	17839		Significant diff. among means (P < 0.05)?	Yes						CACGFP/DF vs. CacGFP/DF;a2dOE	-1278	-3169 to 613.7	No	ns	0.2373	B-D
	10727	14799	16304		Range	7539	5878	10842	6373		R squared	0.2526
12250	13435	15353	13815															Test details	Mean 1	Mean 2	Mean Diff.	SE of diff.	n1	n2	t	DF
11831	12584	17174	12817		Mean	15105	13617	17142	14895		Brown-Forsythe test							CACGFP vs. CacGFP;a2dOE	15105	17142	-2037	780.5	19	15	2.61	62
18417	11707	21312	12135		Std. Deviation	2120	1636	3154	2036		F (DFn, DFd)	2.589 (3, 62)						CACGFP/DF vs. CacGFP/DF;a2dOE	13617	14895	-1278	825.2	20	12	1.548	62
14904	14445	21349	14942		Std. Error of Mean	486.3	365.9	814.4	587.6		P value	0.0608
19370	15734	13465									P value summary	ns
12362	13997	18675									Are SDs significantly different (P < 0.05)?	No
12433	15526	18913
14824	13675										Bartlett's test
13768	14287										Bartlett's statistic (corrected)	7.326
	16160										P value	0.0622
17950	14041										P value summary	ns
15587	10282										Are SDs significantly different (P < 0.05)?	No
16349
											ANOVA table	SS	DF	MS	F (DFn, DFd)	P value
											Treatment (between columns)	107013603	3	35671201	F (3, 62) = 6.985	P=0.0004
											Residual (within columns)	316623875	62	5106837
											Total	423637478	65
											Data summary
											Number of treatments (columns)	4
											Number of values (total)	66

## Sheet: Figure 5N
Avg AZ Cac Normalized to Controls																			DESCRIPTIVE STATISTICS																				T Test (null 1st)			T test (null 2nd)			T Test (null 3rd)			T test (het 1st)
CTRL (1st)	a2d null (1st)	Control (2nd)	a2d null (2nd)	Control (3rd)	a2d null (3rd)	Control (1st)	a2d het (1st)	control (2nd)	a2d het (2nd)	Control (3rd)	a2d Het (3rd)	Control (1st)	a2d-OE (1st)	control (2nd)	a2d-OE (2nd)	Control (3rd)	a2d-OE (3rd)			Control Small (bg sub)	a2d2 / k1084 Small (bg sub)	Control medium	a2d2 / k1084 medium	Control Seg 1/2	a2d null Seg 1/2	Control (1st)	Het	control	a2d het	Control (3rd)	Het	Control (1st)	OE	control	OE	Control (3rd)	OE		Table Analyzed	a2d phenotypes over time normalized to 1		Table Analyzed	a2d phenotypes over time normalized to 1		Table Analyzed	a2d phenotypes over time normalized to 1		Table Analyzed	a2d phenotypes over time normalized to 1
0.976442	0.551319	1.16087	0.644702	1.08391	0.433967	1.10602	1.10085	0.896042	0.924894	1.17707	0.83157	1.00451	1.00924	0.797942	0.838753	1.00373	1.0758		Number of values	12	13	15	9	12	12	12	10	14	10	10	11	10	12	18	18	10	12
1.05305	0.559021	0.88112	0.709885	1.10833	0.286312	0.841787	0.94717	1.18725	0.990712	1.02803	0.771588	0.864284	0.768123	0.914676	0.913434	1.09375	0.885383																						Column B	a2d null (1st)		Column D	a2d null (2nd)		Column F	a2d null (3rd)		Column H	a2d het (1st)
1.25809	0.58746	1.12299	0.647793	0.928177	0.249226	1.31842	1.00504	1.19166	1.11225	0.997606	0.969745	0.917089	1.20305	1.15589	0.962738	0.93508	1.02132		Minimum	0.821	0.3803	0.7074	0.3997	0.8397	0.2182	0.6868	0.9472	0.8802	0.8347	0.8938	0.4888	0.8643	0.6267	0.7979	0.8388	0.8744	0.8854		vs.	vs.		vs.	vs.		vs.	vs.		vs.	vs.
1.08186	0.615397	0.707369	0.449573	0.892754	0.417803	1.05177	1.06667	1.09806	1.02908	0.914283	1.04902	0.973323	0.959733	1.12351	1.06278	1.07609	1.02403		25% Percentile	0.9576	0.4929	0.9289	0.4544	0.9152	0.2745	0.868	1.002	0.9118	0.8861	0.9122	0.8316	0.9142	0.7921	0.8866	0.9136	0.9227	1.022		Column A	CTRL (1st)		Column C	Control (2nd)		Column E	Control (3rd)		Column G	Control (1st)
0.821031	0.380277	0.950495	0.459476	0.962627	0.273358	1.03394	1.18258	1.04869	0.834737	1.00795	0.869558	1.07909	0.943458	1.05075	0.913686	0.885741	1.10898		Median	0.9746	0.559	0.9755	0.6322	0.9864	0.3174	1.038	1.084	0.957	0.9384	1.003	0.8708	0.9889	0.9474	0.9919	1.024	1.013	1.106
0.955568	0.572147	0.906743	0.39969	0.91081	0.349822	0.946709	0.992344	1.03805	0.875302	1.09592	0.900853	0.905505	0.863864	0.948824	1.1244	1.03698	1.27395		75% Percentile	1.045	0.6165	1.123	0.6512	1.083	0.4157	1.124	1.186	1.067	1.001	1.045	0.9602	1.082	1.025	1.131	1.063	1.081	1.188		Unpaired t test			Unpaired t test			Unpaired t test			Unpaired t test
0.963589	0.477442	0.975541	0.459266	1.15321	0.277943	1.17637	1.3276	0.915706	0.889702	0.893811	0.960182	1.21143	1.07343	1.00255	0.980949	0.874443	1.10212		Maximum	1.258	0.7831	1.168	0.7099	1.153	0.4619	1.318	1.328	1.192	1.112	1.177	1.049	1.211	1.203	1.26	1.124	1.104	1.274		P value	<0.0001		P value	<0.0001		P value	<0.0001		P value	0.175
1.00069	0.558064	1.00939	0.654657	0.987446	0.409549	0.686762	1.10641	0.900018	0.990981	0.905808	0.865472	1.00959	0.626664	1.26014	0.974673	1.10412	1.21917		Range	0.4371	0.4028	0.461	0.3102	0.3135	0.2438	0.6317	0.3804	0.3114	0.2775	0.2833	0.5603	0.3471	0.5764	0.4622	0.2856	0.2297	0.3886		P value summary	****		P value summary	****		P value summary	****		P value summary	ns
1.0196	0.624102	1.16842	0.632231	1.07853	0.218159	1.04262	1.03376	0.951168	0.951759	1.00921	0.488762	0.943297	0.951386	1.0826	1.06679	0.967114	1.14552																						Significantly different (P < 0.05)?	Yes		Significantly different (P < 0.05)?	Yes		Significantly different (P < 0.05)?	Yes		Significantly different (P < 0.05)?	No
0.972659	0.404978	1.16402		0.839733	0.309125	0.977841	1.19659	0.924411	0.925109	0.97031	0.870819	1.09187	0.892272	0.846457	1.03315	1.02296	1.20273		Mean	1	0.5569	1	0.5619	1	0.3344	1	1.096	1	0.9525	1	0.8661	1	0.9125	1	1	1	1.098		One- or two-tailed P value?	Two-tailed		One- or two-tailed P value?	Two-tailed		One- or two-tailed P value?	Two-tailed		One- or two-tailed P value?	Two-tailed
0.928178	0.508342	0.957569		0.985268	0.461939	0.688109		0.880245			0.94936		0.627894	0.894405	1.04058		1.12993		Std. Deviation	0.1041	0.1028	0.1263	0.1171	0.09788	0.07962	0.1883	0.1142	0.1048	0.08138	0.08811	0.1462	0.1042	0.1718	0.1377	0.0806	0.08263	0.1085		t, df	t=10.70, df=23		t, df	t=8.447, df=22		t, df	t=18.28, df=22		t, df	t=1.406, df=20
0.969241	0.783067	0.958197		1.06993	0.32569	1.12964		0.948589					1.03079	1.19656	1.06388		0.986707		Std. Error of Mean	0.03006	0.02853	0.0326	0.03902	0.02825	0.02298	0.05435	0.0361	0.02802	0.02574	0.02786	0.04408	0.03294	0.0496	0.03245	0.019	0.02613	0.03132
	0.617676	0.928907						0.962827						1.152	1.01711																								How big is the difference?			How big is the difference?			How big is the difference?			How big is the difference?
		1.03307						1.05728						0.982673	1.05325																								Mean of column A	1		Mean of column C	1		Mean of column E	1		Mean of column G	1
		1.07531												0.830932	1.03023																								Mean of column B	0.5569		Mean of column D	0.5619		Mean of column F	0.3344		Mean of column H	1.096
														1.00106	1.11765																								Difference between means (B - A) ± SEM	-0.4431 ± 0.04142		Difference between means (D - C) ± SEM	-0.4381 ± 0.05186		Difference between means (F - E) ± SEM	-0.6657 ± 0.03642		Difference between means (H - G) ± SEM	0.09590 ± 0.06819
														0.895783	0.902344																								95% confidence interval	-0.5288 to -0.3575		95% confidence interval	-0.5456 to -0.3305		95% confidence interval	-0.7412 to -0.5901		95% confidence interval	-0.04634 to 0.2381
														0.863153	0.905197																								R squared (eta squared)	0.8327		R squared (eta squared)	0.7643		R squared (eta squared)	0.9382		R squared (eta squared)	0.09
																																							F test to compare variances			F test to compare variances			F test to compare variances			F test to compare variances
																																							F, DFn, Dfd	1.025, 11, 12		F, DFn, Dfd	1.164, 14, 8		F, DFn, Dfd	1.511, 11, 11		F, DFn, Dfd	2.720, 11, 9
																																							P value	0.9606		P value	0.8598		P value	0.5047		P value	0.1439
																																							P value summary	ns		P value summary	ns		P value summary	ns		P value summary	ns
																																							Significantly different (P < 0.05)?	No		Significantly different (P < 0.05)?	No		Significantly different (P < 0.05)?	No		Significantly different (P < 0.05)?	No
																																							Data analyzed			Data analyzed			Data analyzed			Data analyzed
																																							Sample size, column A	12		Sample size, column C	15		Sample size, column E	12		Sample size, column G	12
																																							Sample size, column B	13		Sample size, column D	9		Sample size, column F	12		Sample size, column H	10
