# Supplementary material for: Regulation of presynaptic Ca2+ channel abundance at active zones through a balance of delivery and turnover
Source: eLife. 2022 Jul 14;11:e78648. doi: 10.7554/eLife.78648 (PMC9352347; doi:10.7554/eLife.78648)
Supplement: Figure 6—figure supplement 1—source data 1. [file elife-78648-fig6-figsupp1-data1.xlsx]

## Sheet: Figure 1C
TEVC Evoked EJC Peak (nA)						DESCRIPTIVE STATISTICS					ANOVA Test						MULTIPLE COMPARISON TEST
CTRL (Ib & Is)	CTRL (Ib-only)	Flp (Ib & Is)	Flp (Ib-only)								Table Analyzed	TEVC Quant - PEAK
52.3764	27.8831	13.8949	4.6979			CTRL (Ib & Is)	CTRL (Ib-only)	Flp (Ib & Is)	Flp (Ib-only)		Data sets analyzed	A-D					Number of families	1
41.1845	24.5203	5.78583	4.18318		Number of values	8	6	15	5								Number of comparisons per family	4
40.9735	37.4642	3.65838	7.61714								ANOVA summary						Alpha	0.05
38.317	38.9973	11.0668	3.7913		Minimum	37.22	24.52	3.658	3.791		F	65.4
37.2217	34.8957	19.1477	8.4579		25% Percentile	38.12	27.04	11.07	3.987		P value	<0.0001					Šídák's multiple comparisons test	Mean Diff.	95.00% CI of diff.	Below threshold?	Summary	Adjusted P Value
38.0588	30.1877	18.4144			Median	41.08	32.54	14.7	4.698		P value summary	****					No Flp Both vs. Flp Both	26.98	20.64 to 33.32	Yes	****	<0.0001	A-C
43.9811		12.4019			75% Percentile	44.57	37.85	19.15	8.038		Significant diff. among means (P < 0.05)?	Yes					No Flp 1b vs. Flp 1b	26.58	17.81 to 35.34	Yes	****	<0.0001	B-D
44.7658		24.0714			Maximum	52.38	39	25.14	8.458		R squared	0.8674					No Flp Both vs. No Flp 1b	9.785	1.966 to 17.60	Yes	**	0.0096	A-B
		11.5485			Range	15.15	14.48	21.48	4.667								Flp Both vs. Flp 1b	9.383	1.907 to 16.86	Yes	**	0.0093	C-D
		14.6959									Brown-Forsythe test
		19.0015			Mean	42.11	32.32	15.13	5.749		F (DFn, DFd)	1.682 (3, 30)					Test details	Mean 1	Mean 2	Mean Diff.	SE of diff.	n1	n2	t	DF
		21.2064			Std. Deviation	4.968	5.705	6.222	2.134		P value	0.192					No Flp Both vs. Flp Both	42.11	15.13	26.98	2.392	8	15	11.28	30
		25.1432			Std. Error of Mean	1.757	2.329	1.607	0.9544		P value summary	ns					No Flp 1b vs. Flp 1b	32.32	5.749	26.58	3.309	6	5	8.031	30
		10.3022									Are SDs significantly different (P < 0.05)?	No					No Flp Both vs. No Flp 1b	42.11	32.32	9.785	2.951	8	6	3.316	30
		16.6455															Flp Both vs. Flp 1b	15.13	5.749	9.383	2.822	15	5	3.325	30
											Bartlett's test
											Bartlett's statistic (corrected)	4.473
											P value	0.2147
											P value summary	ns
											Are SDs significantly different (P < 0.05)?	No
											ANOVA table	SS	DF	MS	F (DFn, DFd)	P value
											Treatment (between columns)	5859	3	1953	F (3, 30) = 65.40	P<0.0001
											Residual (within columns)	895.8	30	29.86
											Total	6755	33
											Data summary
											Number of treatments (columns)	4

## Sheet: Figure 1D
HRP Area (square microns)					DESCRIPTIVE STATISTICS						ANOVA TEST						MULTIPLE COMPARISONS
											Table Analyzed	HRP AREA (square microns)					Number of families	1
CTRL (Ib & Is)	CTRL (Ib-only)	Flp (Ib & Is)	Flp (Ib-only)			CTRL (Ib & Is)	CTRL (Ib-only)	Flp (Ib & Is)	Flp (Ib-only)		Data sets analyzed	A-D					Number of comparisons per family	2
263.15	248.638	171.853	175.11		Number of values	8	6	9	5								Alpha	0.05
221.786	170.082	150.257	278.766								ANOVA summary
236.622	185.66	164.75	128.071		Minimum	154.8	131	139.5	128.1		F	0.5082					Šídák's multiple comparisons test	Mean Diff.	95.00% CI of diff.	Below threshold?	Summary	Adjusted P Value
163.093	130.985	171.567	178.099		25% Percentile	172.9	160.3	157.5	151.6		P value	0.6804					CTRL (Ib & Is) vs. Flp (Ib & Is)	28.63	-34.91 to 92.18	No	ns	0.5004	A-C
154.809	233.765	219.006	184.974		Median	229.2	209.7	171.6	178.1		P value summary	ns					CTRL (Ib-only) vs. Flp (Ib-only)	18.82	-60.37 to 98.00	No	ns	0.8203	B-D
269.911	277.795	169.663			75% Percentile	257.6	255.9	198.7	231.9		Significant diff. among means (P < 0.05)?	No
240.869		178.347			Maximum	269.9	277.8	349.1	278.8		R squared	0.05973					Test details	Mean 1	Mean 2	Mean Diff.	SE of diff.	n1	n2	t	DF
202.4		139.497			Range	115.1	146.8	209.6	150.7								CTRL (Ib & Is) vs. Flp (Ib & Is)	219.1	190.4	28.63	26.64	8	9	1.075	24
		349.077									Brown-Forsythe test						CTRL (Ib-only) vs. Flp (Ib-only)	207.8	189	18.82	33.2	6	5	0.5668	24
					Mean	219.1	207.8	190.4	189		F (DFn, DFd)	0.1516 (3, 24)
					Std. Deviation	42.86	54.87	63.37	55		P value	0.9276
					Std. Error of Mean	15.15	22.4	21.12	24.59		P value summary	ns
											Are SDs significantly different (P < 0.05)?	No
											Bartlett's test
											Bartlett's statistic (corrected)	1.019
											P value	0.7966
											P value summary	ns
											Are SDs significantly different (P < 0.05)?	No
											ANOVA table	SS	DF	MS	F (DFn, DFd)	P value
											Treatment (between columns)	4583	3	1528	F (3, 24) = 0.5082	P=0.6804
											Residual (within columns)	72143	24	3006
											Total	76726	27
											Data summary
											Number of treatments (columns)	4
											Number of values (total)	28

## Sheet: Figure 1E
AZ Number					DESCRIPTIVE STATISTICS							ANOVA							MULTIPLE COMPARISONS
												Table Analyzed	AZ number						Number of families	1
CTRL (Ib & Is)	CTRL (Ib-only)	Flp (Ib & Is)	Flp (Ib-only)			CTRL (Ib & Is)	CTRL (Ib-only)	Flp (Ib & Is)	Flp (Ib-only)			Data sets analyzed	A-D						Number of comparisons per family	2
290	305	288	220		Number of values	8	6	8	5										Alpha	0.05
217	226	263	243									ANOVA summary
256	269	235	170		Minimum	150	209	198	170			F	1.389						Šídák's multiple comparisons test	Mean Diff.	95.00% CI of diff.	Below threshold?	Summary	Adjusted P Value
233	209	254	244		25% Percentile	174.3	216.5	239.8	195			P value	0.2713						CTRL (Ib & Is) vs. Flp (Ib & Is)	-30.88	-75.37 to 13.62	No	ns	0.2088	A-C
238	219	257	225		Median	235.5	236.5	259	225			P value summary	ns						CTRL (Ib-only) vs. Flp (Ib-only)	25.43	-28.45 to 79.32	No	ns	0.4679	B-D
250	247	198			75% Percentile	254.5	278	279.5	243.5			Significant diff. among means (P < 0.05)?	No
160		285			Maximum	290	305	288	244			R squared	0.1534						Test details	Mean 1	Mean 2	Mean Diff.	SE of diff.	n1	n2	t	DF
150		261			Range	140	96	90	74										CTRL (Ib & Is) vs. Flp (Ib & Is)	224.3	255.1	-30.88	18.6	8	8	1.66	23
												Brown-Forsythe test							CTRL (Ib-only) vs. Flp (Ib-only)	245.8	220.4	25.43	22.53	6	5	1.129	23
					Mean	224.3	245.8	255.1	220.4			F (DFn, DFd)	0.6007 (3, 23)
					Std. Deviation	47.74	36.08	28.64	30.12			P value	0.6211
					Std. Error of Mean	16.88	14.73	10.13	13.47			P value summary	ns
												Are SDs significantly different (P < 0.05)?	No
												Bartlett's test
												Bartlett's statistic (corrected)	2.011
												P value	0.5701
												P value summary	ns
												Are SDs significantly different (P < 0.05)?	No
												ANOVA table	SS	DF	MS	F (DFn, DFd)	P value
												Treatment (between columns)	5768	3	1923	F (3, 23) = 1.389	P=0.2713
												Residual (within columns)	31834	23	1384
												Total	37603	26
												Data summary
												Number of treatments (columns)	4
												Number of values (total)	27

## Sheet: Figure 1H
Avg AZ BRP			DESCRIPTIVE STATISTICS				T TEST
							Table Analyzed	BRP averages
Control	Flip			Control	Flip
29673	23281		Number of values	12	12		Column B	Flip
26899	22391						vs.	vs.
30257	24045		Minimum	22553	22391		Column A	Control
27482	25124		25% Percentile	26331	23472
25448	24754		Median	27191	25002		Unpaired t test
27685	22987		75% Percentile	29176	27873		P value	0.1602
27627	26766		Maximum	35466	31517		P value summary	ns
35466	24879		Range	12913	9126		Significantly different (P < 0.05)?	No
26716	30525						One- or two-tailed P value?	Two-tailed
26823	26816		Mean	27736	25943		t, df	t=1.454, df=22
22553	28225		Std. Deviation	3118	2923
26203	31517		Std. Error of Mean	900.2	843.7		How big is the difference?
							Mean of column A	27736
							Mean of column B	25943
							Difference between means (B - A) ± SEM	-1794 ± 1234
							95% confidence interval	-4352 to 765.2
							R squared (eta squared)	0.08763
							F test to compare variances
							F, DFn, Dfd	1.138, 11, 11
							P value	0.8338
							P value summary	ns
							Significantly different (P < 0.05)?	No
							Data analyzed
							Sample size, column A	12
							Sample size, column B	12

## Sheet: Figure 1I
Avg. AZ RBP			DESCRIPTIVE STATISTICS				T TEST
							Table Analyzed	RBP averages
Control	Flip			Control	Flip
20810	22301		Number of values	12	12		Column B	Flip
19644	23182						vs.	vs.
21317	23405		Minimum	16561	21599		Column A	Control
20165	22116		25% Percentile	19141	22162
19460	25467		Median	20312	23130		Unpaired t test
19034	21599		75% Percentile	20806	24972		P value	<0.0001
20794	22892		Maximum	22176	27470		P value summary	****
22176	23078		Range	5615	5871		Significantly different (P < 0.05)?	Yes
20459	26226						One- or two-tailed P value?	Two-tailed
20526	23486		Mean	19910	23593		t, df	t=5.347, df=22
17973	21894		Std. Deviation	1521	1838
16561	27470		Std. Error of Mean	439.2	530.6		How big is the difference?
							Mean of column A	19910
							Mean of column B	23593
							Difference between means (B - A) ± SEM	3683 ± 688.8
							95% confidence interval	2255 to 5112
							R squared (eta squared)	0.5652
							F test to compare variances
							F, DFn, Dfd	1.460, 11, 11
							P value	0.541
							P value summary	ns
							Significantly different (P < 0.05)?	No
							Data analyzed
							Sample size, column A	12
							Sample size, column B	12

## Sheet: Figure 1K
Avg Bouton SYX1			DESCRIPTIVE STATISTICS				T TEST
							Table Analyzed	Syx1a 647 (GFP Objects mean NMJ)
Control	Flip			Control	Flip
15715	20022		Number of values	9	12		Column B	Flip
13872	18320						vs.	vs.
14242	15367		Minimum	13862	13617		Column A	Control
18366	13617		25% Percentile	14057	15286
18851	16543		Median	15715	17432		Unpaired t test
13862	18988		75% Percentile	18432	19611		P value	0.1756
16034	20137		Maximum	18851	20137		P value summary	ns
14812	15232		Range	4989	6520		Significantly different (P < 0.05)?	No
18497	15259						One- or two-tailed P value?	Two-tailed
	16405		Mean	16028	17365		t, df	t=1.407, df=19
	19818		Std. Deviation	2051	2229
	18673		Std. Error of Mean	683.5	643.4		How big is the difference?
							Mean of column A	16028
							Mean of column B	17365
							Difference between means (B - A) ± SEM	1337 ± 950.5
							95% confidence interval	-652.2 to 3327
							R squared (eta squared)	0.09434
							F test to compare variances
							F, DFn, Dfd	1.181, 11, 8
							P value	0.8331
							P value summary	ns
							Significantly different (P < 0.05)?	No
							Data analyzed
							Sample size, column A	9
							Sample size, column B	12

## Sheet: Figure 1L
Avg. Bouton CPX			DESCRIPTIVE STATISTICS				T TEST
							Table Analyzed	cpx 488 (GFP Objects mean NMJ)
Control	Flip			Control	Flip
21119	20322		Number of values	9	12		Column B	Flip
18700	21101						vs.	vs.
17257	18264		Minimum	16261	14226		Column A	Control
20765	14226		25% Percentile	17855	16071
18636	19107		Median	18640	17740		Unpaired t test
16261	17215		75% Percentile	20112	20146		P value	0.3502
18452	20933		Maximum	21119	21101		P value summary	ns
18640	16806		Range	4858	6875		Significantly different (P < 0.05)?	No
19458	15826						One- or two-tailed P value?	Two-tailed
	15047		Mean	18810	17961		t, df	t=0.9579, df=19
	19616		Std. Deviation	1528	2298
	17065		Std. Error of Mean	509.4	663.5		How big is the difference?
							Mean of column A	18810
							Mean of column B	17961
							Difference between means (B - A) ± SEM	-849.1 ± 886.5
							95% confidence interval	-2705 to 1006
							R squared (eta squared)	0.04606
							F test to compare variances
							F, DFn, Dfd	2.262, 11, 8
							P value	0.2563
							P value summary	ns
							Significantly different (P < 0.05)?	No
							Data analyzed
							Sample size, column A	9
							Sample size, column B	12

## Sheet: Figure 1S1B
# of MN1-Ib somas flipped (out of 14)				DESCRIPTIVE STATISTICS					ANOVA						Multiple comparisons
1st instar	2nd instar	3rd instar			1st instar	early 2nd instar	3rd instar		Table Analyzed	Percent of somas (red # / 14)					Number of families	1
10	10	13		Number of values	8	8	6		Data sets analyzed	A-C					Number of comparisons per family	3
10	13	13													Alpha	0.05
12	13	13		Minimum	10	10	13		ANOVA summary
11	13	14		25% Percentile	10	12.25	13		F	11.89					Tukey's multiple comparisons test	Mean Diff.	95.00% CI of diff.	Below threshold?	Summary	Adjusted P Value
12	13	14		Median	11	13	13.5		P value	0.0004					1st instar vs. early 2nd instar	-1.75	-3.020 to -0.4798	Yes	**	0.0065	A-B
11	12	14		75% Percentile	12	13.75	14		P value summary	***					1st instar vs. 3rd instar	-2.5	-3.872 to -1.128	Yes	***	0.0005	A-C
12	14			Maximum	12	14	14		Significant diff. among means (P < 0.05)?	Yes					early 2nd instar vs. 3rd instar	-0.75	-2.122 to 0.6220	No	ns	0.3664	B-C
10	14			Range	2	4	1		R squared	0.5558
															Test details	Mean 1	Mean 2	Mean Diff.	SE of diff.	n1	n2	q	DF
				Mean	11	12.75	13.5		Brown-Forsythe test						1st instar vs. early 2nd instar	11	12.75	-1.75	0.5	8	8	4.95	19
				Std. Deviation	0.9258	1.282	0.5477		F (DFn, DFd)	0.2879 (2, 19)					1st instar vs. 3rd instar	11	13.5	-2.5	0.5401	8	6	6.547	19
				Std. Error of Mean	0.3273	0.4532	0.2236		P value	0.7531					early 2nd instar vs. 3rd instar	12.75	13.5	-0.75	0.5401	8	6	1.964	19
									P value summary	ns
									Are SDs significantly different (P < 0.05)?	No
									Bartlett's test
									Bartlett's statistic (corrected)	3.38
									P value	0.1845
									P value summary	ns
									Are SDs significantly different (P < 0.05)?	No
									ANOVA table	SS	DF	MS	F (DFn, DFd)	P value
									Treatment (between columns)	23.77	2	11.89	F (2, 19) = 11.89	P=0.0004
									Residual (within columns)	19	19	1
									Total	42.77	21
									Data summary
									Number of treatments (columns)	3
									Number of values (total)	22

## Sheet: Figure 1S1D
AZ Number				DESCRIPTIVE STATISTICS					T test						Multiple comparisons
2nd instar	3rd instar				2nd instar	3rd instar
42	290			Number of values	8	8
37	217								Table Analyzed	AZ number in 2nd instar
55	256			Minimum	37	150
53	233			25% Percentile	42.25	174.3			Column B	3rd instar
47	238			Median	50	235.5			vs.	vs.
58	250			75% Percentile	57.25	254.5			Column A	2nd instar
43	160			Maximum	63	290
63	150			Range	26	140			Unpaired t test
									P value	<0.0001
				Mean	49.75	224.3			P value summary	****
				Std. Deviation	8.924	47.74			Significantly different (P < 0.05)?	Yes
				Std. Error of Mean	3.155	16.88			One- or two-tailed P value?	Two-tailed
									t, df	t=10.16, df=14
									How big is the difference?
									Mean of column A	49.75
									Mean of column B	224.3
									Difference between means (B - A) ± SEM	174.5 ± 17.17
									95% confidence interval	137.7 to 211.3
									R squared (eta squared)	0.8806
									F test to compare variances
									F, DFn, Dfd	28.62, 7, 7
									P value	0.0002
									P value summary	***
									Significantly different (P < 0.05)?	Yes
									Data analyzed
									Sample size, column A	8
									Sample size, column B	8

## Sheet: Figure 1S1F
Avg BRP abundance					Descriptive Statistics						ANOVA						Multiple Comparisons
Control Top 50%	Flp Top 50%	Control Low 50%	Flp Low 50%			Control Top 50%	Flp Top 50%	Control Low 50%	Flp Low 50%
39063.3	30472.1	20542.1	16292.7		Number of values	12	12	12	12		Table Analyzed	Original Flp binned analysis (BRP)
36263	29833.4	18063.5	15213.1								Data sets analyzed	A-D
39720.5	32468	21145.8	15798.9		Minimum	29560	29833	15651	14326								Number of families	1
36466.5	33544.1	18885.2	17028.6		25% Percentile	35186	31380	17562	15360		ANOVA summary						Number of comparisons per family	2
33143.4	31966	17918.9	17783.6		Median	36365	34332	18394	17293		F	113.1					Alpha	0.05
36042	31184.3	19410.2	14938.8		75% Percentile	38593	37674	20259	18665		P value	<0.0001
37137.7	36255.3	18723.5	17556.4		Maximum	48020	40840	24108	22661		P value summary	****					Šídák's multiple comparisons test	Mean Diff.	95.00% CI of diff.	Below threshold?	Summary	Adjusted P Value
48020.5	35711.6	24107.9	14325.5		Range	18460	11007	8456	8336		Significant diff. among means (P < 0.05)?	Yes					Control Top 50% vs. Flp Top 50%	2321	-819.9 to 5462	No	ns	0.1794	A-B
35589.3	39840.3	17930.7	21579.3								R squared	0.8852					Control Low 50% vs. Flp Low 50%	1335	-1806 to 4477	No	ns	0.5515	C-D
29560.1	35120.5	15651.4	18605		Mean	36937	34615	18874	17539
35052	38147.3	17442.5	18685		Std. Deviation	4378	3659	2244	2566		Brown-Forsythe test						Test details	Mean 1	Mean 2	Mean Diff.	SE of diff.	n1	n2	t	DF
37180.7	40840.1	16671.8	22661.1		Std. Error of Mean	1264	1056	647.8	740.6		F (DFn, DFd)	1.028 (3, 44)					Control Top 50% vs. Flp Top 50%	36937	34615	2321	1357	12	12	1.711	44
											P value	0.3897					Control Low 50% vs. Flp Low 50%	18874	17539	1335	1357	12	12	0.9843	44
											P value summary	ns
											Are SDs significantly different (P < 0.05)?	No
											Bartlett's test
											Bartlett's statistic (corrected)	5.923
											P value	0.1154
											P value summary	ns
											Are SDs significantly different (P < 0.05)?	No
											ANOVA table	SS	DF	MS	F (DFn, DFd)	P value
											Treatment (between columns)	3747143717	3	1249047906	F (3, 44) = 113.1	P<0.0001
											Residual (within columns)	485922493	44	11043693
											Total	4233066210	47
											Data summary
											Number of treatments (columns)	4
											Number of values (total)	48

[truncated: 75 more sheets: Figure 1S1H, Figure 1S1J, Figure 1S1K, Figure 2B, Figure 2C, Figure 2F, Figure 2G, Figure 2H, Figure 2I, Figure 2K, Figure 2L, Figure 2N, Figure 2O, Figure 2R, Figure 2T, Figure 2U, Figure 2W, Figure 3B, Figure 3E, Figure 3G …]
