# Supplementary material for: Regulation of presynaptic Ca2+ channel abundance at active zones through a balance of delivery and turnover
Source: eLife. 2022 Jul 14;11:e78648. doi: 10.7554/eLife.78648 (PMC9352347; doi:10.7554/eLife.78648)
Supplement: Figure 6—source data 1. [file elife-78648-fig6-data1.xlsx]

## Sheet: Figure 6B
% Cac Positive AZs			DESCRIPTIVE STATISTICS				T TEST
UNBL	24H			UNBL	24H		Table Analyzed	% Cac-positive AZs in CTRL UNBL vs 24H (Fig6B)
0.978261	0.835294		Number of values	11	9
0.967391	0.966667						Column B	24H
0.925234	0.94		Minimum	0.9143	0.7895		vs.	vs.
0.914286	0.974359		25% Percentile	0.9259	0.8258		Column A	UNBL
0.967213	0.92233		Median	0.9672	0.9223
0.984848	0.919355		75% Percentile	0.9848	0.9682		Unpaired t test
0.989362	0.969697		Maximum	1	0.9744		P value	0.0422
0.93	0.789474		Range	0.08571	0.1849		P value summary	*
0.929293	0.816327						Significantly different (P < 0.05)?	Yes
0.925926			Mean	0.9556	0.9037		One- or two-tailed P value?	Two-tailed
1			Std. Deviation	0.031	0.07123		t, df	t=2.187, df=18
			Std. Error of Mean	0.009347	0.02374
							How big is the difference?
							Mean of column A	0.9556
							Mean of column B	0.9037
							Difference between means (B - A) ± SEM	-0.05190 ± 0.02374
							95% confidence interval	-0.1018 to -0.002031
							R squared (eta squared)	0.2099
							F test to compare variances
							F, DFn, Dfd	5.278, 8, 10
							P value	0.0172
							P value summary	*
							Significantly different (P < 0.05)?	Yes
							Data analyzed
							Sample size, column A	11
							Sample size, column B	9

## Sheet: Figure 6C
Single AZ Cac-GFP			DESCRIPTIVE STATISTICS				MANN WHITNEY TEST
UNBL	24H			UNBL	24H		Table Analyzed	pooled UNBL vs 24H in controls (Fig 6C)
308623	46757		Number of values	946	804
430354	42403						Column B	24H
280844	64297		Minimum	3174	4608		vs.	vs.
376987	87859		25% Percentile	64583	42997		Column A	UNBL
355766	80341		Median	114209	65500
248117	42981		75% Percentile	184646	95281		Mann Whitney test
264490	28582		Maximum	577909	232329		P value	<0.0001
221990	42331		Range	574735	227721		Exact or approximate P value?	Approximate
217201	26611						P value summary	****
355311	105094		Mean	136052	72261		Significantly different (P < 0.05)?	Yes
244121	8664		Std. Deviation	92816	39389		One- or two-tailed P value?	Two-tailed
243980	33541		Std. Error of Mean	3018	1389		Sum of ranks in column A,B	994585 , 537541
337005	39866						Mann-Whitney U	213931
242496	37297
236869	37052						Difference between medians
317858	45403						Median of column A	114209, n=946
286520	56323						Median of column B	65500, n=804
293487	30593						Difference: Actual	-48710
145958	22528						Difference: Hodges-Lehmann	-46408
208983	11725
275858	64334
198297	56425
182661	48909
182112	21368
150606	41701
174826	21653
170557	79821
154031	35863
150403	52192
137648	43476
148631	41136
144845	90055
141663	50130
182933	30755
104223	35383
113194	82114
169371	93281
118488	74824
116911	16237
115877	82691
104212	42334
112274	31764
168792	57571
107539	64113
97907	29553
105493	104371
102343	42867
82095	16006
81326	46851
91253	75193
83076	48396
75259	136264
74370	43635
87436	108866
86592	28372
72387	53791
83180	91526
74491	76629
73650	23052
72763	24901
77065	101497
71288	36155
71227	43667
68751	21085
67227	53701
66967	44258
64921	82194
64209	97672
83627	26395
57731	91333
57199	106308
56248	24129
54986	108079
50281	39226
49287	66133
45099	125318
48628	78229
48178	124157
66699	85634
47409	63115
42632	71050
44350	37057
30871	48048
29806	21626
24785	35179
31910	53122
26545	33565
28258	70115
26183	95844
23896	53830
13929	59636
12789	36169
381045	110093
359332	118154
331512	44189
301119	72075
423729	79952
253588	60595
308424	69180
226779	208275
183151	32575
236795	81223
319414	47533
317863	129566
191445	33965
221870	63589
217557	94322
204944	104912
203128	63785
194840	71476
260742	80105
186817	70205
182866	84810
153280	43194
175857	123644
240415	57225
172057	30129
228231	118180
151311	71039
83246	59698
139205	107761
207303	92633
149186	51622
142457	45451
134813	134621
134617	21471
164422	63317
120869	120625
96653	65628
114082	39649
95670	39376
152591	24827
89960	65439
72947	178744
104500	59957
134103	62639
92054	171834
127800	46623
91161	62544
89038	11437
88235	90810
81349	41178
80419	62960
48563	61791
78716	71607
76736	56069
76237	57266
92096	21799
68418	91680
62705	40510
67564	48155
66837	115430
64004	36877
62645	41044
62346	80240
62311	42965
61569	93995
36731	110744
59344	72083
49129	49830
56255	100726
53664	92829
53419	100418
51251	48670
51217	154831
42171	145014
48921	89865
47140	114270
43005	81365
40516	124735
38020	96855
27369	110650
32710	94541
29868	115332
29747	81427
29614	35506
29310	4784
25904	127460
24141	58056
20669	133445
19050	116146
18380	70790
16852	63284
12062	121095
298340	87820
248111	90383
365520	83013
207229	47814
243564	95398
237709	34654
236146	132195
226447	120127
273973	123476
215920	70879
214999	29516
167673	120838
197393	98316
239009	62565
264465	212727
184355	55104
179655	87832
151797	75335
178746	106289
157032	63805
140316	110544
202987	163283
136305	69183
159236	214222
153766	103555
139771	128973
146630	140437
142803	67128
141865	66903
217326	60129
84848	15281
131512	46589
159570	43756
109531	178759
177221	11967
106154	41161
173699	37512
120052	76982
119902	50086
119603	70561
73158	81368
100500	12979
117907	30401
117374	37016
71850	76075
116486	46054
115923	67494
114141	45355
114014	98301
113938	131616
226290	50209
77715	56624
108097	44619
82627	120479
107389	56336
107274	31940
105929	57016
158585	103034
98492	20805
88534	42688
95050	84495
94426	29133
92608	125759
91025	121110
76552	63100
89882	55770
52227	122248
68654	10126
123711	111454
56922	43045
73175	114009
72891	63409
72699	58797
70233	175129
64369	60186
62466	78382
51859	58189
56525	28389
50787	41243
52993	39021
48913	71387
43516	59465
50024	18928
41069	16033
48068	27950
39072	41686
45019	149494
37987	47763
38582	111243
40196	166888
40140	88159
39801	93358
38622	35203
36783	81633
36634	27727
36020	30595
29985	108000
35131	128647
30435	107556
28360	98847
22912	117362
15915	81906
20575	40876
18511	154362
16098	31042
13898	17172
8289	100451
236859	61646
235220	44462
232413	113893
230031	28063
403737	46536
360019	91698
302991	44643
201746	69773
212903	42883
208599	43396
287126	55888
192583	65560
263977	40313
176065	108321
121181	68189
175032	27634
170914	51695
156474	61195
169418	91591
168494	93750
166143	64159
222340	51243
147770	31287
209928	71075
149093	28642
117644	48705
134361	29825
133080	55465
130436	61223
129889	57539
128913	95519
125670	84121
105368	65743
122528	55584
120283	106784
115250	21812
96284	110767
112736	46951
108297	25905
97690	46775
86262	78326
99329	39993
130399	80983
87354	79120
86257	41959
74739	28786
70379	109357
63900	66050
75356	21483
71852	28644
69974	138568
65711	57416
65543	102455
54097	139725
60836	30193
56387	57107
56106	96685
53908	80899
49372	38061
52785	25219
66785	44381
51030	66379
43505	158363
41565	94931
23082	55489
22241	88145
19646	132014
15913	24940
14689	50640
6834	89262
337444	71996
309815	133808
309075	104151
257819	36389
243510	69111
350565	44607
213630	135636
230945	73121
314546	5161
223601	35944
189326	28307
185090	36576
185613	91889
165410	131490
247554	24178
177412	145307
241273	49407
169434	129938
168686	57211
167001	10128
163683	40283
147951	33093
147205	49098
145783	43438
143606	84448
138268	53829
132128	21492
130165	69083
105124	18084
118218	34334
98947	115962
107585	208513
105693	133245
94846	84070
76791	73386
83161	62314
76987	62579
70488	40545
78961	82870
78347	15730
63866	20448
71786	57538
71486	121595
63419	27571
62048	100039
64295	38890
60359	47344
59859	179190
55360	121420
55138	137904
54095	97545
52892	69837
45764	60833
39486	22753
45792	100331
55014	35042
43124	54208
20868	149291
33818	37614
27723	82517
18446	109767
577909	68021
385333	55073
417469	133440
448219	23451
440367	177072
285454	58944
286886	85265
273160	113046
227918	118268
246180	179878
328721	170587
204365	66408
186602	28363
192034	92864
178197	84488
177671	10240
244408	214856
162503	100223
173114	8926
164472	132775
152861	130018
151709	72505
208008	11428
140543	187347
140023	43251
169984	68924
114654	109451
164322	34517
132780	120966
126956	15324
162753	46307
157722	62877
110541	77428
119588	70778
119301	52488
116542	24341
115255	20810
88848	74259
88234	77068
139489	111336
100679	44876
86935	100984
75793	52237
80049	71630
78005	85562
77078	75551
76201	82315
64015	59742
72268	49963
71172	54653
64844	51040
68930	71070
51918	45290
60801	56914
59756	74814
58872	58035
53443	128848
56417	68001
38811	30710
46017	70020
48999	62271
43144	56094
42662	97069
40592	69636
35954	105989
20024	19355
388068	48021
530452	63854
377711	60044
372739	99510
340959	99491
561444	45360
468272	70920
326496	50988
265424	49751
301889	129217
273175	25176
407951	138593
248999	58995
402001	12779
287780	42043
275736	125456
252171	39261
374156	29629
265942	117005
257177	17434
256601	122120
248021	75130
247601	82676
341513	92325
339214	36016
243488	30501
201875	124350
382173	164111
230314	32317
227228	39670
209668	40753
216200	141938
295892	127603
212475	129525
211713	46680
204613	67661
279724	27964
200132	68288
182601	89914
256989	115114
195155	106225
178261	189963
147858	43681
174737	66520
171028	44434
169968	33843
169700	68460
167778	86601
161557	32451
161556	30078
136625	112755
161092	85712
134562	77243
157778	66857
156090	101655
151399	56029
148036	114737
145809	134435
145071	123070
143112	53657
135712	82530
184506	47406
127953	160113
170320	204731
54823	38262
118403	159127
106449	101911
112672	64256
112471	56869
106466	94238
80604	84036
104028	120980
129133	76311
90917	113175
87674	72234
86882	63820
85611	57765
79130	91076
71155	108090
73781	118291
73762	89470
70215	73122
61070	109538
48069	67559
53900	130619
52768	87260
43523	70593
50917	127977
49744	120332
46930	126361
42773	106962
43846	161833
41151	40265
25556	50643
107034	57485
69670	53207
164711	72053
104039	55930
37043	41702
117033	107251
126769	47323
27446	36616
113880	110613
144425	122248
63662	44963
124742	121991
114277	93010
127911	53155
70068	67286
90418	150071
73467	83709
112908	89875
216916	76410
38889	38227
231123	61408
172395	42239
30590	79475
188863	43348
214353	27331
208337	58688
343234	47635
26221	110610
88819	50151
98723	36974
220980	69096
171622	36491
165435	57692
107260	96137
244791	51541
152735	44778
66422	72352
105023	57207
146575	46368
220094	82682
74777	50981
137335	64735
298387	83320
150479	47880
189597	97563
221530	64055
150041	76067
154515	72203
122316	31287
323642	107207
135980	76449
259126	41627
183097	61173
65606	142611
119104	68569
194078	85478
167928	24374
62170	85284
95437	64494
62460	139605
163799	127993
183744	130860
212288	35220
40417	136962
116455	81166
105760	73130
185353	25000
88052	92366
127965	97004
101507	112250
190812	45623
62632	168951
50031	62053
93852	84201
206625	59068
83964	80552
18089	60691
216326	131902
32132	54908
157604	78439
95604	116653
55764	67582
35865	151977
39715	107496
31333	132165
222197	40797
66252	80952
28410	88327
99279	142030
24675	141147
167619	232329
88642	191613
95927	148181
135238	165448
114895	130813
80323	119391
80334	108194
53400	35596
185530	30703
156502	67003
87246	83733
247183	72752
160409	16057
239456	17691
200360	20843
42700	93886
130277	98092
173949	74771
149391	87983
44067	57484
177124	82071
87674	106155
103374	22778
147550	71522
11820	36620
21058	78427
98488	106355
191083	55004
17439	64122
129693	11405
169755	44006
78331	70364
18549	52540
84303	29103
68538	64476
139393	67563
75100	64005
248031	27049
82606	105333
174523	69186
32862	59918
116329	68988
94188	79672
199391	79070
58897	65113
84509	63827
33493	46802
122630	40567
120921	12221
44350	13996
134716	48089
60520	126600
63206	94096
140411	29888
73465	70170
9336	79075
94052	40972
232811	88368
317860	77831
90521	16616
128433	33705
160918	93360
9109	129689
273701	116215
87539	75404
158142	66988
118435	112241
23270	62762
138564	44844
151005	31996
113538	63962
246852	30754
82798	26493
64586	13630
96023	28378
186625	5868
61166	10475
260098	86229
202045	59730
225666	56830
28031	69320
225440	91892
324822	133761
76415	130126
351306	44208
48970	65641
103284	89427
54498	125840
117424	30979
127313	48332
90997	30350
295078	74151
323471	90224
243686	80258
154523	43137
298600	38425
176789	60262
49496	78846
48309	99850
67754	62578
109290	23339
162921	64503
202626	28562
40948	46864
167956	43119
84779	57559
64573	13790
21007	64549
226249	90360
187984	63430
169781	55412
56889	20496
190365	74412
116332	69868
51353	66469
16061	35777
18078	73357
105995	12830
50198	118805
3174	15353
104626	66021
123455	14718
90360	110854
110003	59548
61674	39292
42419	4608
29663	43366
97488	60628
67859	42867
21733	41534
130099	19059
210175	86418
80805
70206
186758
114529
74002
38003
155307
60279
63647
185064
89379
250457
181328
72540
423291
399927
252058
124360
64429
108475
132002
138357
112594
143174
111128
78675
168882
322756
144515
207065
182890
73936
271844
109365
35273
14847
105578
272088
219109
160849
85326
76591
53719
264165
41484
26288
86320
108175
74850
112478
21798
190510
39865
345108
193727
241134
288325
160444
56651
280153
269815
318072
193952
282627
70805
37911
104143
187638
170288
140568
83580
67656
166008
67299
186213
330516
204017
138489
162327
55660
48425
70986
42997
85882
52560
193761
41208
45414
270719
312517
82341
97914
272409
254382
76194
245890
265695
79935
168191
79700
274561
65387
161738
80034
449963
29803
201714
227846
176773
88831
85421
254188
110315
54397
225762
204164
64832
385852
152965
143479
181639
102725
58372
126222
166815
69341
37624
137558
108950
147135
57745
132625
38482
183580
98761
173653
47471
129466
92827
291547
156189
169162

## Sheet: Figure 6D
Cac/BRP Correlation in UNBL CTRL
Sum Cac	Sum BRP
308623	576060
430354	536280
280844	356257
376987	456168
355766	684173
248117	382374
264490	366151
221990	358598
217201	248759
355311	364810
244121	386270
243980	376167
337005	422241
242496	350732
236869	325995
317858	483110
286520	359205
293487	411251
145958	156344
208983	301358
275858	340962
198297	366007
182661	368917
182112	250145
150606	194318
174826	322558
170557	180191
154031	173590
150403	250560
137648	185844
148631	285710
144845	236691
141663	325395
182933	232888
104223	167811
113194	227278
169371	151561
118488	199546
116911	127357
115877	267010
104212	144482
112274	250312
168792	255245
107539	208680
97907	273661
105493	179661
102343	137899
82095	194621
81326	99398
91253	255138
83076	135612
75259	115732
74370	125970
87436	83185
86592	121677
72387	87349
83180	79563
74491	153286
73650	113898
72763	149567
77065	183141
71288	185503
71227	107966
68751	159664
67227	92960
66967	90349
64921	77002
64209	74667
83627	156823
57731	148406
57199	66227
56248	118589
54986	126292
50281	102158
49287	119823
45099	121404
48628	114043
48178	142351
66699	148850
47409	154262
42632	37964
44350	6927
30871	75964
29806	60316
24785	49798
31910	32515
26545	11533
28258	115866
26183	83479
23896	27178
13929	38502
12789	66257
381045	324263
359332	422163
331512	375594
301119	231208
423729	390518
253588	206205
308424	360572
226779	265924
183151	196638
236795	405403
319414	365398
317863	287367
191445	193247
221870	283819
217557	215928
204944	219801
203128	273846
194840	273835
260742	280304
186817	193638
182866	247599
153280	151736
175857	225219
240415	294843
172057	204299
228231	275983
151311	267148
83246	125116
139205	141996
207303	281710
149186	236469
142457	100727
134813	129464
134617	136663
164422	229295
120869	173061
96653	71839
114082	171000
95670	109491
152591	240238
89960	142055
72947	83479
104500	146949
134103	138688
92054	84942
127800	213905
91161	107467
89038	199117
88235	147571
81349	128343
80419	176406
48563	50908
78716	109803
76736	184180
76237	93701
92096	145164
68418	94179
62705	69831
67564	148136
66837	102870
64004	114815
62645	96361
62346	91239
62311	86503
61569	75003
36731	74089
59344	85845
49129	97043
56255	87663
53664	113841
53419	84840
51251	59354
51217	92996
42171	65750
48921	69743
47140	42565
43005	99630
40516	84129
38020	42900
27369	56107
32710	59320
29868	47707
29747	61506
29614	73120
29310	36677
25904	79306
24141	29373
20669	51764
19050	23921
18380	116141
16852	8161
12062	11614
298340	330037
248111	423396
365520	465237
207229	271802
243564	298818
237709	252021
236146	307490
226447	329568
273973	364700
215920	283978
214999	228102
167673	243152
197393	223710
239009	393348
264465	387713
184355	368133
179655	206253
151797	207795
178746	336917
157032	218549
140316	142204
202987	282738
136305	121732
159236	194181
153766	233787
139771	157426
146630	159493
142803	185948
141865	202129
217326	325331
84848	156577
131512	194781
159570	161956
109531	263722
177221	229549
106154	189975
173699	228600
120052	138786
119902	129223
119603	114168
73158	106398
100500	110157
117907	165474
117374	108725
71850	138797
116486	174227
115923	138609
114141	138918
114014	100328
113938	103745
226290	336283
77715	108243
108097	153749
82627	150217
107389	161485
107274	124962
105929	132911
158585	303583
98492	101207
88534	140000
95050	46046
94426	164114
92608	93215
91025	82258
76552	151828
89882	141997
52227	79524
68654	83922
123711	146828
56922	92884
73175	75099
72891	117251
72699	34459
70233	85712
64369	98075
62466	83364
51859	106487
56525	90895
50787	70353
52993	56182
48913	93367
43516	22320
50024	74117
41069	28058
48068	84429
39072	46139
45019	69141
37987	92492
38582	94629
40196	35305
40140	116384
39801	101251
38622	74163
36783	62285
36634	59867
36020	18264
29985	88065
35131	39031
30435	52550
28360	39352
22912	27058
15915	29457
20575	59534
18511	40306
16098	3119
13898	51976
8289	45379
236859	164548
235220	171115
232413	272195
230031	183589
403737	385658
360019	421725
302991	302271
201746	315681
212903	171115
208599	283104
287126	180328
192583	183623
263977	234104
176065	219101
121181	113366
175032	221339
170914	159887
156474	210719
169418	148322
168494	251542
166143	272652
222340	266228
147770	161944
209928	169656
149093	218308
117644	129402
134361	139886
133080	146230
130436	116659
129889	139678
128913	118714
125670	120359
105368	144532
122528	123071
120283	158303
115250	120734
96284	105094
112736	144157
108297	124580
97690	107374
86262	124142
99329	130589
130399	150848
87354	158006
86257	83082
74739	38999
70379	84778
63900	93947
75356	64621
71852	74636
69974	62750
65711	53080
65543	50661
54097	28300
60836	44456
56387	67727
56106	82018
53908	92507
49372	84733
52785	64885
66785	110268
51030	53893
43505	56614
41565	79139
23082	22388
22241	21591
19646	13383
15913	51514
14689	49190
6834	20630
337444	235826
309815	264745
309075	272496
257819	163065
243510	289745
350565	320295
213630	187426
230945	171860
314546	239664
223601	221182
189326	151197
185090	117638
185613	142977
165410	194810
247554	347606
177412	192744
241273	308320
169434	237586
168686	151313
167001	207527
163683	170992
147951	81399
147205	163564
145783	215593
143606	131340
138268	88260
132128	156833
130165	188879
105124	171080
118218	84415
98947	108462
107585	144665
105693	134026
94846	120557
76791	122361
83161	145678
76987	62737
70488	89425
78961	84137
78347	100390
63866	56736
71786	64366
71486	127610
63419	68983
62048	103003
64295	79976
60359	148598
59859	103612
55360	142900
55138	106625
54095	69095
52892	76722
45764	73601
39486	50734
45792	55448
55014	85917
43124	75411
20868	36371
33818	58511
27723	56891
18446	42706
577909	424257
385333	223613
417469	291864
448219	348557
440367	389958
285454	279105
286886	224698
273160	248723
227918	213344
246180	165707
328721	345958
204365	273255
186602	145662
192034	253730
178197	217735
177671	191653
244408	249433
162503	118016
173114	108446
164472	198942
152861	184512
151709	154996
208008	198384
140543	135031
140023	121487
169984	138317
114654	108447
164322	212248
132780	181409
126956	190089
162753	207540
157722	243252
110541	69608
119588	158816
119301	190960
116542	117666
115255	142446
88848	71038
88234	105971
139489	183346
100679	145879
86935	127949
75793	94238
80049	102440
78005	201824
77078	90415
76201	67119
64015	90521
72268	70229
71172	116168
64844	38185
68930	113902
51918	71410
60801	97068
59756	135406
58872	124226
53443	70013
56417	138731
38811	61746
46017	64248
48999	55498
43144	73161
42662	101993
40592	53345
35954	94659
20024	35010
388068	245265
530452	440096
377711	332550
372739	220463
340959	237638
561444	441611
468272	428838
326496	265525
265424	253841
301889	233112
273175	182875
407951	215136
248999	261843
402001	317547
287780	315694
275736	247575
252171	156554
374156	274755
265942	251259
257177	238426
256601	246613
248021	171637
247601	265708
341513	365557
339214	227870
243488	259556
201875	185538
382173	269061
230314	139569
227228	157340
209668	131251
216200	135359
295892	224283
212475	167025
211713	208898
204613	166651
279724	320806
200132	144326
182601	218923
256989	199403
195155	165734
178261	221796
147858	156908
174737	174379
171028	206969
169968	160782
169700	132106
167778	131338
161557	147578
161556	160700
136625	167773
161092	126563
134562	78582
157778	102287
156090	99835
151399	149794
148036	135191
145809	106369
145071	143710
143112	94186
135712	98863
184506	173348
127953	167733
170320	197725
54823	37333
118403	260185
106449	82840
112672	78170
112471	85614
106466	86934
80604	61124
104028	69055
129133	172051
90917	35879
87674	67225
86882	45276
85611	43131
79130	62149
71155	96430
73781	66264
73762	58556
70215	36488
61070	112556
48069	28635
53900	43638
52768	42388
43523	19085
50917	35999
49744	96999
46930	48199
42773	32523
43846	62510
41151	34094
25556	14881
107034	117866
69670	119480
164711	146538
104039	114215
37043	31088
117033	67371
126769	124861
27446	34746
113880	97206
144425	118026
63662	55767
124742	128251
114277	123032
127911	110987
70068	90504
90418	109462
73467	63520
112908	150073
216916	205652
38889	67764
231123	148080
172395	200654
30590	62186
188863	283042
214353	205680
208337	247617
343234	400681
26221	44499
88819	168182
98723	227315
220980	329691
171622	166360
165435	271618
107260	211428
244791	280692
152735	201092
66422	140810
105023	157619
146575	203826
220094	310954
74777	109158
137335	185198
298387	446429
150479	174246
189597	208702
221530	252985
150041	172588
154515	177507
122316	139101
323642	315710
135980	230764
259126	384409
183097	194599
65606	83983
119104	193124
194078	238286
167928	178293
62170	106684
95437	179138
62460	87263
163799	120585
183744	188211
212288	262508
40417	93766
116455	180871
105760	128950
185353	236899
88052	144771
127965	182762
101507	128435
190812	221000
62632	130135
50031	82827
93852	108293
206625	205421
83964	86728
18089	29628
216326	263587
32132	20578
157604	167542
95604	108219
55764	86322
35865	58835
39715	58607
31333	59192
222197	284740
66252	112329
28410	61936
99279	111459
24675	22251
167619	195464
88642	57669
95927	87923
135238	155129
114895	147376
80323	51702
80334	63834
53400	30921
185530	162125
156502	163486
87246	76694
247183	155892
160409	132035
239456	295057
200360	188476
42700	32159
130277	180835
173949	103800
149391	95677
44067	52017
177124	108203
87674	67484
103374	70435
147550	101632
11820	46493
21058	45846
98488	164239
191083	170084
17439	95265
129693	188791
169755	197774
78331	97881
18549	41034
84303	119303
68538	76222
139393	123479
75100	110102
248031	194521
82606	115527
174523	151382
32862	73754
116329	148269
94188	133064
199391	164998
58897	88820
84509	91200
33493	41501
122630	109926
120921	108515
44350	87490
134716	104992
60520	48565
63206	62937
140411	75484
73465	139585
9336	39070
94052	112397
232811	111914
317860	238495
90521	90410
128433	118367
160918	142464
9109	33322
273701	204584
87539	74962
158142	106649
118435	84628
23270	90317
138564	137469
151005	148169
113538	170941
246852	332098
82798	116217
64586	73436
96023	162179
186625	223382
61166	66491
260098	322339
202045	241875
225666	360801
28031	53205
225440	232197
324822	290855
76415	104147
351306	311633
48970	66554
103284	222436
54498	77291
117424	136970
127313	168482
90997	91392
295078	296928
323471	211847
243686	220830
154523	148290
298600	347809
176789	196112
49496	29801
48309	50821
67754	92181
109290	82093
162921	144200
202626	102512
40948	35306
167956	100060
84779	45246
64573	39237
21007	9395
226249	192443
187984	336147
169781	247036
56889	83809
190365	363175
116332	225776
51353	132129
16061	69658
18078	37806
105995	204555
50198	144833
3174	62069
104626	256560
123455	320569
90360	156340
110003	176270
61674	175037
42419	165101
29663	111507
97488	197848
67859	220875
21733	47489
130099	184547
210175	254766
80805	183476
70206	115744
186758	132881
114529	183336
74002	120356
38003	53467
155307	165745
60279	156295
63647	122226
185064	232226
89379	387884
250457	311334
181328	192447
72540	149629
423291	412446
399927	496918
252058	280644
124360	174939
64429	59109
108475	134959
132002	275961
138357	158246
112594	197157
143174	266436
111128	169883
78675	74733
168882	334341
322756	488834
144515	140286
207065	254518
182890	231240
73936	169800
271844	450512
109365	129499
35273	56399
14847	52210
105578	160526
272088	200869
219109	259824
160849	297867
85326	109984
76591	119038
53719	63489
264165	384260
41484	65944
26288	57042
86320	108745
108175	142831
74850	146987
112478	157977
21798	74392
190510	190471
39865	69108
345108	439468
193727	275210
241134	133467
288325	319337
160444	243095
56651	62948
280153	338103
269815	360510
318072	328104
193952	214891
282627	363462
70805	92244
37911	64430
104143	148078
187638	183310
170288	232630
140568	203616
83580	121201
67656	78149
166008	162264
67299	123685
186213	208077
330516	288841
204017	211778
138489	356223
162327	394623
55660	174884
48425	41425
70986	136599
42997	72068
85882	94835
52560	80690
193761	558153
41208	47371
45414	57112
270719	398671
312517	363840
82341	118636
97914	302225
272409	322736
254382	309761
76194	154828
245890	346729
265695	311134
79935	92742
168191	223183
79700	128400
274561	353889
65387	114780
161738	268692
80034	53401
449963	376777
29803	104213
201714	235919
227846	203085
176773	367339
88831	122807
85421	153297
254188	305785
110315	234686
54397	102516
225762	334188
204164	332029
64832	93198
385852	411031
152965	259390
143479	224495
181639	287397
102725	212375
58372	107569
126222	205046
166815	237801
69341	196154
37624	53548
137558	195792
108950	249706
147135	271372
57745	81558
132625	228569
38482	80123
183580	248749
98761	183281
173653	182640
47471	97837
129466	223772
92827	123847
291547	375085
156189	209590
169162	182799

## Sheet: Figure 6E
Cac/BRP correlation in 24H CTRL
Sum Cac	Sum BRP
46757	86883
42403	127320
64297	104418
87859	175030
80341	77210
42981	84991
28582	131464
42331	69296
26611	76618
105094	185490
8664	30698
33541	108018
39866	96322
37297	58467
37052	81892
45403	75763
56323	60150
30593	119321
22528	118367
11725	40693
64334	156021
56425	149936
48909	111531
21368	44618
41701	185939
21653	53961
79821	189095
35863	80344
52192	129098
43476	40306
41136	101466
90055	247072
50130	124942
30755	124767
35383	84397
82114	208420
93281	196615
74824	168373
16237	58380
82691	181802
42334	65401
31764	81407
57571	91243
64113	121758
29553	64418
104371	173167
42867	68236
16006	15888
46851	117844
75193	158447
48396	97667
136264	177012
43635	76062
108866	197323
28372	49802
53791	78514
91526	96377
76629	141053
23052	44269
24901	28932
101497	246167
36155	76734
43667	129560
21085	44649
53701	130772
44258	87636
82194	128925
97672	333476
26395	95501
91333	132233
106308	196538
24129	50968
108079	194848
39226	61060
66133	112180
125318	148304
78229	91083
124157	136606
85634	107136
63115	106001
71050	182733
37057	74058
48048	70045
21626	93771
35179	104495
53122	65853
33565	114482
70115	214789
95844	231260
53830	112303
59636	166980
36169	129682
110093	281210
118154	272616
44189	149458
72075	220229
79952	132535
60595	165403
69180	138699
208275	386088
32575	149636
81223	233869
47533	91082
129566	274601
33965	83879
63589	197896
94322	255090
104912	137588
63785	210617
71476	116950
80105	219440
70205	141994
84810	197958
43194	105395
123644	288183
57225	156742
30129	127414
118180	224211
71039	169628
59698	186836
107761	243985
92633	195931
51622	184320
45451	53256
134621	192110
21471	77131
63317	115294
120625	276330
65628	132718
39649	65806
39376	76683
24827	18673
65439	122180
178744	280371
59957	107644
62639	151938
171834	318179
46623	116444
62544	157329
11437	44304
90810	178976
41178	73871
62960	109657
61791	109096
71607	126844
56069	105109
57266	121154
21799	72268
91680	161166
40510	98482
48155	120414
115430	306661
36877	73598
41044	71873
80240	136829
42965	80672
93995	104468
110744	222748
72083	152569
49830	94858
100726	245205
92829	177840
100418	274276
48670	177848
154831	287006
145014	467590
89865	322949
114270	261385
81365	187856
124735	418153
96855	202497
110650	230883
94541	124683
115332	187820
81427	171103
35506	141815
4784	32794
127460	336523
58056	88396
133445	180075
116146	263172
70790	242168
63284	193786
121095	465936
87820	150932
90383	173995
83013	258977
47814	200414
95398	338685
34654	159759
132195	337952
120127	289976
123476	240937
70879	236285
29516	96822
120838	268870
98316	298290
62565	243738
212727	417152
55104	110016
87832	140448
75335	252551
106289	181355
63805	106126
110544	291820
163283	468823
69183	182968
214222	254098
103555	194365
128973	311530
140437	298441
67128	109900
66903	57993
60129	79680
15281	50761
46589	129221
43756	58181
178759	230048
11967	53482
41161	160120
37512	67886
76982	252314
50086	140604
70561	258511
81368	203437
12979	58013
30401	128958
37016	91883
76075	151798
46054	102327
67494	181410
45355	165783
98301	297664
131616	375735
50209	153036
56624	151930
44619	67018
120479	266311
56336	185011
31940	138569
57016	196195
103034	341962
20805	62483
42688	113858
84495	161522
29133	74393
125759	247153
121110	225378
63100	169286
55770	50321
122248	164563
10126	40089
111454	313495
43045	72276
114009	250949
63409	173712
58797	107618
175129	405814
60186	71792
78382	160294
58189	128786
28389	164547
41243	68875
39021	44315
71387	124217
59465	134828
18928	37840
16033	22885
27950	38639
41686	91260
149494	341029
47763	110211
111243	292886
166888	413700
88159	195964
93358	211360
35203	108871
81633	255526
27727	96028
30595	94687
108000	244484
128647	310433
107556	282802
98847	211712
117362	307464
81906	331594
40876	73282
154362	487898
31042	155088
17172	41255
100451	210306
61646	196454
44462	152307
113893	295516
28063	72543
46536	89716
91698	214483
44643	113404
69773	162992
42883	143889
43396	90249
55888	210817
65560	173366
40313	143652
108321	294790
68189	223571
27634	106721
51695	103126
61195	154740
91591	228038
93750	240099
64159	185758
51243	118776
31287	71384
71075	173168
28642	55769
48705	80652
29825	70730
55465	107402
61223	134239
57539	101971
95519	229418
84121	107956
65743	137578
55584	160723
106784	192419
21812	70726
110767	348676
46951	58530
25905	101886
46775	307999
78326	250217
39993	122741
80983	234853
79120	239218
41959	71141
28786	59565
109357	271239
66050	248510
21483	49722
28644	134336
138568	258638
57416	209379
102455	198051
139725	247671
30193	70324
57107	250277
96685	243628
80899	162269
38061	51737
25219	53532
44381	87785
66379	155333
158363	432219
94931	184483
55489	136184
88145	211447
132014	388289
24940	84376
50640	185377
89262	440014
71996	186757
133808	385923
104151	284429
36389	108823
69111	216498
44607	154221
135636	352063
73121	272087
5161	204971
35944	137594
28307	209011
36576	215292
91889	435483
131490	408812
24178	107721
145307	395254
49407	65681
129938	244349
57211	146136
10128	188356
40283	121384
33093	104896
49098	139306
43438	172458
84448	524317
53829	120060
21492	84538
69083	118850
18084	107616
34334	121287
115962	241923
208513	501787
133245	249946
84070	180926
73386	183082
62314	135708
62579	186811
40545	54329
82870	230453
15730	96389
20448	85353
57538	226826
121595	269698
27571	63613
100039	254223
38890	88292
47344	109326
179190	350000
121420	304652
137904	353418
97545	236361
69837	183611
60833	109025
22753	52727
100331	216834
35042	62614
54208	136348
149291	361910
37614	51353
82517	138710
109767	179684
68021	161882
55073	116916
133440	261191
23451	89126
177072	328992
58944	85643
85265	157263
113046	155438
118268	259537
179878	300567
170587	334114
66408	81359
28363	62230
92864	224053
84488	132995
10240	27226
214856	491579
100223	283264
8926	79082
132775	208186
130018	217804
72505	180368
11428	32753
187347	342083
43251	78984
68924	199103
109451	229209
34517	109794
120966	337892
15324	44342
46307	222013
62877	273024
77428	376242
70778	194268
52488	125773
24341	103090
20810	45719
74259	144894
77068	258042
111336	267753
44876	114908
100984	202643
52237	114964
71630	154049
85562	125922
75551	137305
82315	153012
59742	161347
49963	133618
54653	120363
51040	122301
71070	143520
45290	160881
56914	153072
74814	298500
58035	211935
128848	348690
68001	214651
30710	93236
70020	184525
62271	201654
56094	130372
97069	173719
69636	170736
105989	256284
19355	43959
48021	125797
63854	167082
60044	297167
99510	172756
99491	209659
45360	91262
70920	164495
50988	87983
49751	42663
129217	218271
25176	80092
138593	269031
58995	202229
12779	26946
42043	95439
125456	195654
39261	128832
29629	61907
117005	282748
17434	54894
122120	260049
75130	92189
82676	190759
92325	120692
36016	56149
30501	38572
124350	195169
164111	263078
32317	16946
39670	129336
40753	75120
141938	167695
127603	162719
129525	211197
46680	123943
67661	36110
27964	61466
68288	136724
89914	109080
115114	152905
106225	121787
189963	152775
43681	62784
66520	175770
44434	80816
33843	51457
68460	121502
86601	126512
32451	46845
30078	47538
112755	108334
85712	206283
77243	95957
66857	103559
101655	236498
56029	92906
114737	410588
134435	329211
123070	371468
53657	128874
82530	199074
47406	120207
160113	290419
204731	286269
38262	94079
159127	317717
101911	149357
64256	166393
56869	195126
94238	121291
84036	273432
120980	142927
76311	160021
113175	246709
72234	145872
63820	199856
57765	93559
91076	172606
108090	248182
118291	206138
89470	206173
73122	148984
109538	197142
67559	158643
130619	241193
87260	213224
70593	128007
127977	361045
120332	230339
126361	249248
106962	201815
161833	328443
40265	50397
50643	54940
57485	218490
53207	128614
72053	237977
55930	178211
41702	88901
107251	365120
47323	68691
36616	120310
110613	321848
122248	222232
44963	130182
121991	238444
93010	124545
53155	96671
67286	160623
150071	330315
83709	151417
89875	215046
76410	144861
38227	59834
61408	131955
42239	67712
79475	233014
43348	144443
27331	48229
58688	153338
47635	90621
110610	226899
50151	119393
36974	172892
69096	201926
36491	137256
57692	126803
96137	186290
51541	60109
44778	113450
72352	120642
57207	66625
46368	101230
82682	86707
50981	53534
64735	74182
83320	55219
47880	37198
97563	89573
64055	76230
76067	196241
72203	113870
31287	71361
107207	134479
76449	127008
41627	84612
61173	68119
142611	217589
68569	70664
85478	102268
24374	55993
85284	105764
64494	91938
139605	251342
127993	235297
130860	266773
35220	97460
136962	195150
81166	197712
73130	160340
25000	62628
92366	143768
97004	122250
112250	201148
45623	54588
168951	222866
62053	80712
84201	92994
59068	85490
80552	151118
60691	93762
131902	208319
54908	57011
78439	142167
116653	164730
67582	82055
151977	153234
107496	188052
132165	343543
40797	63738
80952	116694
88327	184105
142030	258916
141147	216280
232329	415371
191613	296997
148181	251299
165448	292835
130813	218559
119391	152044
108194	161422
35596	68742
30703	81715
67003	192084
83733	234364
72752	138503
16057	38115
17691	51417
20843	41756
93886	203650
98092	155662
74771	126959
87983	180180
57484	111487
82071	130440
106155	171620
22778	43906
71522	173058
36620	119631
78427	189355
106355	197986
55004	77814
64122	159574
11405	20286
44006	137736
70364	137262
52540	141326
29103	67783
64476	96936
67563	167260
64005	119256
27049	67752
105333	202080
69186	160791
59918	89958
68988	137832
79672	199780
79070	137527
65113	105302
63827	86857
46802	76356
40567	77163
12221	50403
13996	54382
48089	181661
126600	240374
94096	153332
29888	59037
70170	155651
79075	173852
40972	71390
88368	124390
77831	217330
16616	46424
33705	31699
93360	105993
129689	296848
116215	207910
75404	66635
66988	102708
112241	218329
62762	73129
44844	96924
31996	50188
63962	84586
30754	80393
26493	29981
13630	46159
28378	39626
5868	37400
10475	36057
86229	76969
59730	108547
56830	86591
69320	76887
91892	90147
133761	189300
130126	246529
44208	192015
65641	112856
89427	182036
125840	143940
30979	100198
48332	99114
30350	61208
74151	125127
90224	148575
80258	175752
43137	71731
38425	77685
60262	181527
78846	184249
99850	134339
62578	102195
23339	85198
64503	199675
28562	78315
46864	88325
43119	136422
57559	112330
13790	51783
64549	112317
90360	129553
63430	97334
55412	90453
20496	49723
74412	103584
69868	153416
66469	125590
35777	107281
73357	228622
12830	55902
118805	194465
15353	39930
66021	128675
14718	39244
110854	264927
59548	133365
39292	98991
4608	26414
43366	128794
60628	154084
42867	83786
41534	107950
19059	83155
86418	212951

## Sheet: Figure 6F
Cac / BRP Pearson r per NMJ			DESCRIPTIVE STATISTICS				T TEST
Control Unbleached	Control 24H			Control Unbleached	Control 24H		Table Analyzed	Cac/BRP Pearson Correlations for CTRL and a2d
0.9167	0.7334		Number of values	11	9
0.9205	0.826						Column B	Control 24H
0.9267	0.8183		Minimum	0.8184	0.7227		vs.	vs.
0.8981	0.8351		25% Percentile	0.8355	0.7582		Column A	Control Unbleached
0.854391	0.79177		Median	0.8904	0.7918
0.8897	0.7227		75% Percentile	0.9167	0.8251		Unpaired t test
0.904656	0.7829		Maximum	0.9267	0.8351		P value	0.0001
0.8904	0.8242		Range	0.1083	0.1124		P value summary	***
0.8355	0.7869						Significantly different (P < 0.05)?	Yes
0.82644			Mean	0.8801	0.7913		One- or two-tailed P value?	Two-tailed
0.8184			Std. Deviation	0.0395	0.04044		t, df	t=4.954, df=18
			Std. Error of Mean	0.01191	0.01348
							How big is the difference?
							Mean of column A	0.8801
							Mean of column B	0.7913
							Difference between means (B - A) ± SEM	-0.08888 ± 0.01794
							95% confidence interval	-0.1266 to -0.05119
							R squared (eta squared)	0.5768
							F test to compare variances
							F, DFn, Dfd	1.048, 8, 10
							P value	0.9258
							P value summary	ns
							Significantly different (P < 0.05)?	No
							Data analyzed
							Sample size, column A	11
							Sample size, column B	9

## Sheet: Figure 6G
Average AZ Cac per NMJ (unbleached)				DESCRIPTIVE STATISTICS				T TEST
Control Unbleached	a2d null Unbleached				Control Unbleached	a2d null Unbleached		Table Analyzed	Figure 6O
131951	63003			Number of values	11	12
123391	37671							Column B	a2d null Unbleached
111747	50526			Minimum	111747	28814		vs.	vs.
127361	34679			25% Percentile	127114	34983		Column A	Control Unbleached
131087	35896			Median	129282	43020
149916	48488			75% Percentile	148897	50017		Unpaired t test
191134	47172			Maximum	191134	64198		P value	<0.0001
127114	48170			Range	79387	35384		P value summary	****
129282	38867							Significantly different (P < 0.05)?	Yes
129207	64198			Mean	136462	44340		One- or two-tailed P value?	Two-tailed
148897	34601			Std. Deviation	21048	11265		t, df	t=13.25, df=21
	28814			Std. Error of Mean	6346	3252
								How big is the difference?
								Mean of column A	136462
								Mean of column B	44340
								Difference between means (B - A) ± SEM	-92122 ± 6953
								95% confidence interval	-106581 to -77663
								R squared (eta squared)	0.8932
								F test to compare variances
								F, DFn, Dfd	3.491, 10, 11
								P value	0.0517
								P value summary	ns
								Significantly different (P < 0.05)?	No
								Data analyzed
								Sample size, column A	11
								Sample size, column B	12

## Sheet: Figure 6H
Average AZ Cac (24H recovery) per NMJ				DESCRIPTIVE STATISTICS				T TEST
Control 24H	a2d null 24H				Control 24H	a2d null 24H		Table Analyzed	Figure 6P
55645	39328			Number of values	9	8
77008	25377							Column B	a2d null 24H
77180	36005			Minimum	55645	23353		vs.	vs.
65599	25219			25% Percentile	59247	25259		Column A	Control 24H
78441	27517			Median	77008	29997
79809	39412			75% Percentile	79125	38497		Unpaired t test
82572	32476			Maximum	82572	39412		P value	<0.0001
60935	23353			Range	26927	16059		P value summary	****
57559								Significantly different (P < 0.05)?	Yes
				Mean	70528	31086		One- or two-tailed P value?	Two-tailed
				Std. Deviation	10524	6578		t, df	t=9.117, df=15
				Std. Error of Mean	3508	2326
								How big is the difference?
								Mean of column A	70528
								Mean of column B	31086
								Difference between means (B - A) ± SEM	-39442 ± 4326
								95% confidence interval	-48663 to -30221
								R squared (eta squared)	0.8471
								F test to compare variances
								F, DFn, Dfd	2.559, 8, 7
								P value	0.233
								P value summary	ns
								Significantly different (P < 0.05)?	No
								Data analyzed
								Sample size, column A	9
								Sample size, column B	8

## Sheet: Figure 6I
AZ Number			DESCRIPTIVE STATISTICS				T TEST
Ctl	Null			Ctl	Null		Table Analyzed	# AZs
93	104		Number of values	19	20
108	103						Column B	Null
71	80		Minimum	50	55		vs.	vs.
62	86		25% Percentile	77	81.25		Column A	Ctl
67	73		Median	91	95.5
95	116		75% Percentile	101	105		Unpaired t test
101	108		Maximum	125	116		P value	0.4534
100	85		Range	75	61		P value summary	ns
82	105						Significantly different (P < 0.05)?	No
85	100		Mean	88.26	92.45		One- or two-tailed P value?	Two-tailed
86	67		Std. Deviation	18	16.5		t, df	t=0.7578, df=37
91	109		Std. Error of Mean	4.13	3.689
101	105						How big is the difference?
79	75						Mean of column A	88.26
104	102						Mean of column B	92.45
125	86						Difference between means (B - A) ± SEM	4.187 ± 5.525
100	91						95% confidence interval	-7.008 to 15.38
77	88						R squared (eta squared)	0.01528
50	111
	55						F test to compare variances
							F, DFn, Dfd	1.191, 18, 19
							P value	0.7079
							P value summary	ns
							Significantly different (P < 0.05)?	No
							Data analyzed
							Sample size, column A	19
							Sample size, column B	20

## Sheet: Figure 6J
AZ BRP / Cac Correlation
Sum Cac	Sum BRP
69807	110866
25393	89229
26287	71180
8718	25902
29529	118275
45619	235994
19999	127894
108756	238583
10855	150229
115798	320277
9583	87657
74598	154694
105027	236148
69600	208235
66536	175562
52782	264906
143167	268721
99044	219035
34916	141432
127404	314423
53249	188884
192370	522079
5932	35750
45267	62114
11794	94731
24176	50830
49412	221639
69103	287685
33980	149824
35705	125047
36465	194412
90733	174147
70125	195458
111791	422753
46945	450337
148448	546448
88552	120906
35287	113844
26744	94323
15287	115238
221077	355571
18097	45542
76885	132492
88900	203401
118549	360141
2878	79498
221784	509471
34622	194556
28534	117560
123061	233512
28354	202181
31623	138500
80894	294028
22931	129709
81117	222864
-1267	27900
17622	220416
53751	174749
13828	118097
6856	31866
118636	231147
34748	100783
7183	68419
16371	98218
6690	90079
97022	160143
95368	155539
8589	151299
112768	237087
115377	225924
12772	109376
124619	196655
52523	78643
143561	408700
120968	331498
46778	175892
147817	220220
13317	129824
1456	44724
55202	296867
11203	31144
98321	225918
44397	181310
41398	220802
53754	293115
156846	460852
91901	294979
59769	125167
99095	312851
88966	311131
21664	233919
146619	355557
58676	179199
131388	330267
15691	118853
105598	293647
12621	105638
65155	301634
10288	71157
67509	239307
42607	143047
28488	69199
749	56829
51675	251129
42372	82852
15671	82160
28546	203276
24228	112050
51863	167434
43769	180543
22364	116881
17973	149364
33802	125300
35027	282039
94294	293949
66444	167093
33132	78664
65650	165614
36250	96483
8997	64178
16200	91534
60698	188182
153468	241704
108874	271192
4177	59345
10269	112807
44918	134887
30660	64661
84776	213660
36914	146741
22429	131041
66135	144170
2211	47607
32565	161302
1504	45541
3022	54286
39526	101511
8704	62366
5998	93892
52482	153276
35573	86349
2573	66803
10148	110944
10628	95908
17883	32565
36959	97862
3321	47904
103884	195240
3011	47896
80165	139809
7081	25217
8789	75405
11405	81358
75174	213462
3450	21636
57866	156779
25342	136347
18836	80013
54734	221776
3866	36732
30170	190428
31538	142682
36103	89951
85428	189643
16220	60405
57762	244307
1611	20255
38873	135408
9776	65529
246	45185
43712	132459
48158	79955
39357	128110
11097	30114
59956	138268
6688	41576
17526	63769
-445	86124
71661	172430
119063	189159
93090	271826
27337	170979
11289	51635
30673	100773
-2946	60412
4479	70658
51794	125634
1548	60139
9074	73517
137234	352329
7874	75616
74358	167955
56659	132911
36890	100406
103017	233048
24700	97246
77118	163813
59875	138728
48483	99276
-2969	30550
73936	270772
16361	135977
114469	229373
21665	89446
13707	84146
22185	174173
22543	93702
26050	89841
61133	137631
90645	248378
41174	174128
105739	203956
37825	103315
55882	230233
23280	102502
33012	108236
31699	119489
150086	283369
47914	139539
12948	100068
84650	174952
51598	140968
7281	70222
76804	202452
146283	286775
44552	83164
66597	280401
57927	170485
103424	222313
139093	282501
166072	358935
91143	169730
49448	105924
61441	145110
62517	155178
54088	91478
28393	103963
67578	143011
12440	101015
89224	175958
24349	76880
16907	65528
35341	134818
33392	105372
37275	86920
30188	110582
9933	58906
53083	182201
37979	117041
2297	47828
21446	56800
67758	170828
23986	91299
57732	232394
8127	42333
14654	90457
9250	79934
45188	109936
32663	101551
5856	42795
60174	132098
93326	306663
2791	63584
71691	237852
26726	119039
18881	90062
45319	141567
41379	170016
62432	179875
35714	151255
53351	155602
1826	78523
44729	100379
89796	271934
5123	100674
30281	130109
64404	174225
95818	263742
7167	123954
30599	137014
115403	294082
85735	242788
14875	66937
103971	336144
31858	132282
19415	56359
10546	46581
32296	141376
20381	53886
-1895	42315
73558	240571
47606	155105
46720	129139
63078	199518
31078	69142
16224	218035
28920	103715
79971	180280
12926	153779
187919	403463
4011	47864
45660	137229
43296	152080
56229	179682
89792	262823
5104	104732
3291	61999
16073	144544
13058	144927
15501	86545
52147	181662
6102	59544
95526	204308
64670	158646
6352	28406
33694	133025
53549	228023
29283	95477
67068	199031
14085	89981
13886	103285
4600	43848
29222	91333
3472	100448
39138	171198
15136	184977
4402	28673
19069	44210
40350	207499
3697	74534
117022	374422
43372	246210
110226	515284
1906	63147
22958	62588
36996	221846
82443	335481
9171	61785
31778	135490
26593	148558
12667	61603
14034	71772
-592	30985
28525	120182
23945	113025
71034	161621
9050	62481
367	61530
12916	137074
69380	163440
7126	115425
50688	247595
1559	74073
101049	310415
35383	96976
5540	117907
84865	407774
12825	46604
36599	244084
60831	196696
43101	291709
28959	154620
16810	206860
15049	95011
18867	134330
60884	155852
35040	170988
13588	57153
7173	79800
46384	108922
63936	191901
77336	216122
46054	190693
74026	249362
19050	129781
44623	123834
65536	254221
78220	246669
4768	89487
17316	124651
33133	201469
28744	129139
20920	176982
54341	227032
62259	275228
56073	320027
23916	176512
30005	108871
3744	51681
5991	39892
6096	46361
8863	130617
39641	97761
30860	115192
11618	152098
3633	133323
62830	266567
10054	127086
19124	117646
24392	265621
45959	148725
2132	39993
66946	258108
46662	114213
9902	90937
6549	110750
4746	62388
14404	154086
110034	362600
89632	205464
10112	148887
1549	75480
23352	278049
11220	154964
-348	73931
9170	134490
11705	94144
5719	48562
3695	80413
13789	88130
4536	67562
65927	254078
74652	166943
51333	211234
33068	125343
3243	82129
14767	221413
51905	262014
65168	235839
76736	276971
120868	338401
4418	36814
69020	220287
93738	290326
27443	125729
27261	130762
1072	53673
58436	185760
53353	189564
73376	165726
53846	108630
55455	57764
173097	205504
117098	231663
72058	109809
80901	137950
38867	149427
6048	40763
33286	129895
27335	151525
47641	43227
87119	189792
4783	34469
41788	210804
54856	122352
91088	187199
80678	150085
86099	133981
64993	144917
15673	97781
11526	60215
31349	73064
11772	76775
43842	103021
42011	109268
32303	108672
14511	87816
89755	146609
10004	102729
27183	51958
78295	149101
19863	169131
115374	227783
101557	193508
67137	251769
36926	64885
51113	158394
18739	149294
202301	255656
5026	121492
67639	149491
4974	65585
1339	58021
65485	104478
45204	122004
10916	178582
11721	91894
87389	189694
107932	307850
89595	212328
34182	125424
33703	89905
8333	72844
203742	374883
47746	196268
136509	246944
51718	138206
61408	120794
51719	213983
9226	125941
13804	51384
18158	72013
24422	112454
136707	260267
12470	67656
2370	62838
64200	122809
135463	159558
38484	106996
54550	104566
8870	81556
10234	54820
18384	58839
78244	167289
11528	98222
49843	116802
23022	88235
9411	75169
969	16113
20967	116206
93948	312418
6085	138257
5212	121350
64483	161063
57656	249901
6663	46435
91974	271884
815	123892
6776	104220
55523	178418
-2713	32178
43442	101400
167	58498
-1654	59466
26027	97340
51065	228418
10936	89039
29991	94781
59623	64176
25418	86933
100463	155770
132051	233787
61703	128040
16624	58813
85078	189829
123860	152336
3187	39206
69726	156366
65766	157060
124799	172876
31930	58892
-1290	30206
51315	120630
21447	24078
8362	60981
-2343	69544
72971	211089
19833	181879
82070	279288
134782	334978
39330	118449
47449	138138
6771	67844
71793	119059
10133	118885
29122	81981
13948	148316
24446	144973
1468	46195
54466	106800
116368	234616
4285	85662
4479	98347
221	60551
11844	140820
1005	57388
88384	193155
62458	189142
9253	93362
43842	94910
113472	192737
2095	34218
76408	146413
34842	154446
4787	92330
64834	135082
69870	156662
115784	209224
5425	53553
42795	143403
10161	82433
3008	47578
51978	86962
82895	164835
2891	45313
10355	62554
16652	53781
13314	83777
129418	184236
5569	37999
29398	44814
251331	361634
172632	230581
33895	123945
122175	281620
32374	138382
126057	262055
18599	57028
21823	61839
8212	63980
24839	197890
30468	95372
29392	71351
20634	69212
17111	100092
1881	136705
67579	157492
30165	129717
28262	94394
7330	86752
56409	139486
101428	170670
42961	182034
15291	78323
31530	168932
23417	58918
40451	164766
19286	75041
19337	148709
97226	195729
27850	140496
16452	109072
50782	116060
102768	261795
7220	96670
129878	211626
77634	180362
6011	32469
5539	94093
7574	78785
93587	146307
130099	235216
149968	217726
27951	63724
48971	144171
6233	92005
36314	145919
58633	186636
112423	230210
78964	212890
5887	35634
7923	74427
93422	163626
7936	67755
76337	198104
22753	51860
48700	107122
9474	49400
49422	118157
55718	64379
121643	166102
33369	136865
11205	40709
24203	50586
107073	249492
18773	83841
17096	133175
59151	218554
50467	190003
15541	121250
21046	89881
43769	131108
56689	133436
87415	166787
62686	184221
220827	357405
40561	128145
69108	178761
1477	58753
9033	101660
-328	42921
20489	111455
11334	28135
57036	141650
17733	93350
6999	99149
-5207	52301
1902	78033
175535	298426
68956	142885
104590	239756
209573	334303
34979	102624
87870	146713
27121	122936
82306	164308
2383	29501
57516	118177
69242	142184
164569	257422
13332	105809
109134	326634
72926	208361
114372	275119
130943	203302
23545	169405
21496	96295
110666	192256
11128	184655
28263	130079
28038	221044
17164	103800
89490	163265
15391	70920
77424	267028
31117	94012
8544	56189
70917	95700
50418	155953
53229	79682
54668	60333
54455	127237
17947	102698
26333	102030
9683	27727
7015	54955
7214	22148
42948	128751
7102	47067
58889	129573
45240	124495
32382	123622
7204	117334
47774	107995
6730	53335
10053	52075
84293	200648
4386	93591
87772	162564
8507	58183
20705	72699
11516	25627
46774	100521
12122	49948
24782	72738
99717	179330
33102	60801
41832	149179
82959	122927
36465	157026
4579	45921
38183	114800
37937	107503
78483	190470
9156	55821
9807	62928
13589	92844
41420	143976
25970	82165
6831	53658
104487	166328
50244	84826
4590	42909
25153	68972
40636	119930
3580	53116
13708	43242
27820	59148
126182	211030
46996	63985
50326	120428
11441	81723
77987	95497
114186	218140
132732	139207
29454	98918
64421	182116
5781	67966
35502	108888
85128	148112
21238	101749
6087	67415
44831	80146
32931	86156
20346	48876
57924	124690
54440	180357
64671	124016
13694	55877
2821	70375
11986	52743
76747	151731
54329	108668
54567	108273
139295	209065
29033	59811
12265	49897
21637	4799
7181	42407
5999	39799
66621	184855
31228	114455
20564	91353
10381	31901
26091	32171
16022	68466
61030	157160
18700	122780
31826	79836
54026	155780
12304	68366
77395	251164
28569	180826
14403	43546
32451	133058
4987	13334
96385	225184
6044	72939
667	36970
32978	122957
23497	64214
74928	246393
17194	108530
12304	81778
24131	66820
59281	122506
34972	104061
12100	52494
5101	59576
13217	107443
3033	32972
-5222	52685
50314	160333
19545	126019
17162	35287
7551	79380
4273	62477
128329	189121
29831	40773
30540	57603
33373	46118
3267	8737
88879	101659
9996	49307
138102	171276
123550	197414
115653	208803
63141	140881
11502	60030
18974	35037
21454	36411
98609	91228
182715	259642
316815	393649
52466	92244
3967	64980
11256	85688
76664	90490
45461	129899
30088	96746
31472	38972
11245	61004
4067	79305
12228	97199
33219	42425
14335	38000
47179	78265
68229	111356
113840	85851
48293	47907
117875	103779
54843	49419
13079	35881
4096	14939
59934	49189
91390	93899
25591	69892
64365	52191
183914	203516
7598	57642
130517	187727
43502	55006
36189	62561
13950	29633
16113	75291
60613	111225
54109	74949
137711	145380
33844	102477
187305	190004
89987	133118
102912	102517
142086	111181
36827	34466
29071	101974
180694	143346
52386	86147
59855	102234
42221	78097
85383	69833
41920	152613
153560	267299
64365	54971
63012	114986
93376	63256
6505	164822
34894	158147
153618	209878
23695	109220
82501	66692
77243	128817
5188	35939
22625	62620
87293	139262
52322	113223
62394	164627
82263	34322
69092	116222
35346	93207
8039	59949
46401	36298
71282	42183
38384	30227
13480	76230
32215	102623
81535	86166
181073	278378
8570	85565
22691	97773
18851	67410
23135	45345
83861	153011
6977	33908
64555	103900
38170	59272
30893	86112
19803	36400
28411	94010
116680	230161
145724	119615
19593	65551
137273	240760
6329	52359
61056	107436
8464	99281
53476	129329
152394	253931
69649	108212
156517	282848
38864	50963
43165	88041
2653	52506
2888	51480
23299	139421
2943	73001
13576	87745
54874	213004
11545	83702
81098	191392
-1356	87635
42013	77622
43991	75311
14830	49468
2007	122674
21974	126758
88398	195660
46768	147871
24057	49198
1803	63153
19199	115939
6507	102812
114020	294240
3664	118080
43153	122444
22100	67634
64142	81483
100429	338865
13229	155213
9329	72226
65868	197053
55225	290859
43687	178564
14697	138303
97978	237282
10087	132257
8170	70310
3765	46005
4820	90039
62002	232808
24681	198047
48528	212686
74241	207362
52601	205183
6870	68437
10183	93157
24407	171100
26087	68378
31655	174933
-39	60104
36164	217761
27315	60910
23944	331827
62800	236315
23331	129340
7506	91750
74621	227449
83624	224198
35609	70361
66897	209917
71131	165989
8584	127783
17691	133069
54583	256416
71948	229309
32668	128662
3504	43266
54346	147948
42007	188140
21007	174781
15327	46035
37010	130204
53892	136825
16573	109941
4113	36099
18649	114370
8420	44687
35654	146581
24923	78383
19270	96962
38084	70337
33184	118936
3433	31522
22245	63158
14673	49218
58503	164108
30584	91783
1078	61263
9173	67598
3566	44671
41900	99184
36315	85849
11138	43500
11362	61512
6990	24318
17351	43110
4374	39700
6488	32109
21251	86594
12863	45113
6573	32219
8855	52363
4047	29786
43214	51386
39918	91028
28455	58171
23477	186546
44883	136880
44630	129225
52197	122074
19114	90319
25622	118123
30112	61230
7222	88673
96409	200475
52761	106497
36102	123325
1050	22653
34407	109004
34889	111076
30107	164623
8525	68585
44428	98489
33811	201029
64163	82993
3497	44361
4338	67001
33383	216884
24173	152747
24439	72476
37714	118437
18077	105666
4537	83124
27341	65683
35368	137716
24066	71076
12169	68220
36869	88455
6205	43046
10814	97807
8444	79531
14936	87662
9510	74823
22645	98422
23796	156509
12079	49589
16241	58015
5051	21483
43980	98836
2618	61601
27114	137907
52851	173890
11895	100804
49078	77297
3557	33052
32805	88084
47333	167376
32577	157361
46963	160118
55363	173947
24760	141557
9857	48371
59089	48020
106654	191317
26477	47546
11473	111435
59629	132772
39051	147251
83780	191331
61220	176381
70141	174896
39545	54994
95253	187133
24274	193527
28249	134608

## Sheet: Figure 6K
AZ BRP / Cac (24 hour) correlation
Sum Cac	Sum BRP
15133	127526
83344	314971
8311	47915
57663	152035
33247	79760
31497	169675
2073	43949
28702	131463
56632	209924
70710	269476
3807	54212
5655	154509
60352	243056
67990	163156
19979	94738
41494	228923
96617	296035
33669	162070
39318	166231
35901	109813
7399	125900
30575	122870
23776	137226
26432	97962
79942	247814
83139	113887
58194	174094
11163	81531
31562	124944
26704	96902
48896	133623
53798	224975
12195	41166
6544	87821
10477	97522
7211	76891
44021	147493
35548	184706
28223	112225
39218	186910
15807	99353
69900	202047
13950	116606
2847	103900
35854	213620
20167	120315
57212	209210
50861	150135
16235	177754
13691	141280
11777	104553
21262	182542
30632	121150
42582	137761
26278	79602
26532	91253
11486	60980
61458	198258
71149	100769
45405	154765
655	23435
11015	50060
73567	175961
19793	101646
8076	58158
103053	243440
57103	148173
21214	114507
3611	39479
11203	77242
4910	49199
90405	145709
54320	153296
43190	62140
76124	266511
47355	143007
26095	49735
24995	102741
36118	99346
29774	101634
26658	122432
39783	139920
12631	49927
37857	89002
63999	166920
117113	256189
12889	132722
10701	21416
68430	186034
99229	215088
24190	79687
28031	66894
96524	302304
32915	92853
32608	158966
104274	189192
48000	114089
80202	239324
26500	105247
27432	155221
44236	139505
81743	199500
53219	111036
76189	170229
7034	82524
2537	59423
18810	101154
36254	109484
7251	31164
13816	44462
36653	171320
19760	98680
-890	69236
-1974	37431
256	78511
4166	42207
16813	87671
1564	58145
20808	62916
1563	82592
14289	71275
7181	26661
47363	115763
6368	32028
2676	27241
-2450	5507
46049	110842
4874	34597
22066	62687
69495	125779
14395	78482
17975	31219
43268	59773
27383	43129
14016	48592
22866	84827
11405	69767
26915	82545
15396	86565
9027	68382
42097	118943
42864	145468
32310	126673
10456	49611
17930	43474
16187	78896
31439	128605
5084	33120
12548	26522
4392	37125
3315	70182
30537	66930
17176	48797
21371	70350
32937	81444
23889	56911
13358	55203
23275	54251
48579	114338
97332	127174
8482	61727
30327	137272
48546	107120
44686	103728
9222	28048
30513	75343
58950	110449
21836	21147
27273	78099
39802	81899
79984	185547
27872	52607
19998	45327
22876	77355
43236	83368
52371	97059
113075	213927
66810	176670
54962	168490
59145	124384
30500	37340
11807	49127
79204	114684
51649	105307
88390	214724
65076	67604
57923	150998
109606	278466
508	84338
83820	246911
27566	132454
16268	147208
23953	152788
24064	139051
8231	106283
35275	119628
95036	221637
54715	220389
38647	129495
30253	67467
60078	208731
36763	145935
20244	76058
59727	201483
17158	155858
46980	139063
53781	93268
20988	29433
74842	201716
32794	125232
66989	188474
19591	60406
18846	50529
19660	94642
20474	102608
28542	153374
31222	109453
52094	295178
14593	126471
5023	52638
9118	117543
52846	111608
13232	57293
18120	68124
47417	158403
32483	145623
77967	201517
6605	126356
25406	83287
37241	92942
7346	56382
17114	78272
14719	37163
41637	203788
7172	70030
60084	155627
57128	140736
23271	138011
14543	105581
70727	191156
10967	38780
28756	57766
2496	36409
51919	237004
43229	111061
13473	143058
13096	69037
33496	117204
14148	98574
10657	92484
29926	153894
9741	49699
104038	264621
72831	94202
30054	85890
38999	108253
3644	39902
47699	147325
3748	44737
5044	61772
12715	33678
20470	68307
48342	55512
26797	103615
1305	69457
37396	67445
32793	85602
54693	201899
9555	37202
51029	161333
4704	50411
77588	186684
51991	208904
3608	74639
42125	126735
29409	163983
62614	267564
63103	157611
57147	110873
25480	64952
1068	53741
23562	284393
44200	143898
34001	262770
6154	105779
29157	165037
23075	110562
5703	81132
18510	149666
14497	80122
3701	54174
32906	131923
23991	147091
796	49680
35599	271568
31876	162868
34302	122968
22866	182104
-614	65915
19790	156579
23354	185465
24417	100941
24044	168519
20628	89921
1935	55614
49028	206081
14587	84780
4485	83147
-903	22604
24991	302570
62325	290565
13800	62403
11920	179177
6108	64199
24961	233627
5437	119121
8405	175537
7922	138583
25580	148241
36096	93400
27102	182376
35318	340991
27360	163999
8567	79591
2877	59958
54044	211057
31003	113331
27220	174799
41089	373972
846	91904
10394	114465
4320	27978
31685	250103
6433	102168
733	128235
18014	232818
20359	257168
34011	325056
24527	133818
33981	265409
12117	183899
38105	171251
32381	316911
22595	111697
31087	130624
11200	121929
40014	276807
66450	354044
67715	301446
41505	208456
72883	221456
44832	103201
49964	202926
24980	87890
30772	331540
49020	269014
17981	79559
41956	327593
70404	314607
49604	157896
40124	188325
9159	133512
6035	111717
13163	87236
-2122	96587
-1925	64007
7565	124395
-724	70551
-2211	41794
2508	87659
12142	320839
17728	199911
-444	197311
-4769	68729
8800	191191
27485	138225
8192	114499
-2179	80831
31327	351735
-6085	76379
-5819	90754
20980	147753
74147	335833
43975	240111
-1137	81164
11115	88002
31289	175992
17762	129399
817	69898
5249	73148
30437	181416
41246	227206
24230	107581
45333	192174
16583	138470
9793	107485
15004	129371
39130	137730
4433	69555
41163	236287
46982	140339
23947	179440
20061	134281
15242	186149
13686	173305
328	71016
31919	132374
19624	67379
27884	66557
45695	133139
47872	274002
-2379	77977
56206	172070
6765	44746
44024	215269
31713	266347
31206	167287
31348	217686
51865	266372
18730	181158
48113	106900
16554	169619
85265	278347
3737	103184
49055	142498
36958	225721
26283	123789
25668	137113
19607	140894
40264	223356
71765	241332
49321	161123
62988	275126
11284	117147
26699	104851
101978	444158
55640	108386
46370	199132
73679	346326
93769	290339
41322	205580
11578	115567
44275	307029
11046	141447
59992	254894
9880	173274
20684	113563
9332	145641
19275	155648
89473	401013
20658	167294
12673	166075
51008	298474
6660	114206
26271	72980
28679	129033
40948	148394
16168	158013
64922	177855
30784	164100
55421	179749
40472	167014
14248	75876
6758	90454
39495	159251
325	75740
2961	60361
10346	97997
1701	67110
16433	112555
-3179	56652
17839	151429
56026	110265
39827	199143
15004	119745
31381	335164
7872	116837
17967	115091
31236	124433
12194	64222
29707	62165
34362	153217
81244	238434
55595	207316
17854	115470
9772	77591
19060	68591
11423	86565
1913	104733
82615	244777
38846	224710
11153	160584
103826	253787
25869	219672
12203	129252
6389	64687
35044	175504
21030	144406
72512	306281
73362	292662
17997	94768
27928	120642
7151	138279
93072	193624
83500	194379
30161	42278
40948	207602
112865	182068
61753	379780
36574	147042
54351	159057
52176	76265
11665	137346
27515	181252
7358	52928
7683	142058
31447	242275
54652	123321
86625	220252
38230	67757
62204	192456
13111	78378
23568	85651
37905	92979
63346	168722
92307	219659
76298	115458
92247	116630
20572	102982
101697	202875
58626	126349
34467	128944
9850	40105
86695	270515
107455	374349
11715	170045
14297	55233
39484	90317
66434	124025
50446	115670
116626	285844
4940	37025
30568	122334
32955	48448
30221	70690
411	94357
1497	32963
139158	228602
17818	84923
74118	104835
45000	53908
51172	151991
15469	46824
3847	75359
23519	94658
8930	25365
26386	121112
28506	70221
33635	114826
5959	39559
58131	77172
18148	28968
41583	72465
10076	47141
49744	103200
81424	183918
68816	207989
91132	195463
68783	154442
104494	121433
57742	139601
41599	110452
46527	140514
130157	277837
32780	116864
58374	136384
72335	237463
10623	112224
18061	66675
43881	67998
57784	251339
48709	221714
94319	257786
18513	95562
39171	105644
67997	231315
29210	223401
4117	40001
33186	160706
7207	144525
10727	66379
30506	62523
64681	208097
33944	143031
15278	67531
17077	113717
72202	255356
41479	154181
83507	471706
9500	64889
29520	128967
36585	231298
16725	91985
28645	113799
21940	187418
39923	146901
48013	308308
85590	476614
57472	289557
42396	118988
68696	191382
30065	96244
17174	66117
45204	173393
52058	357125
39058	155111
4951	13624
56077	413592
105039	217451
28219	161115
-2996	21550
4214	77218
8744	127960
10108	43184
11625	91391
9187	87977
2602	56922
31729	39040
-3482	51667
-170	55261
-3724	85340
40669	59625
5546	44788
6040	109435
-4479	88247
-2662	64273
-4375	79474
-3273	33887
-5683	50093
785	45001
-6585	38872
2781	25891
490	61364
31445	70531
23664	103890
7650	56337
36570	52518
20539	76400
31749	119214
13520	102515
-816	26507
35817	140872
8568	20007
9707	72602
29657	166610
18594	135864
41474	170432
43946	124780
1936	89662
85811	321888
24786	211217
16422	136934
25084	218435
34519	180016
14736	127832
65282	269337
13633	53691
24242	73188
4985	103350
41990	259994
49047	126307
27854	139104
20376	209787
45382	213515
19526	59296
19324	19633
5943	38865
37901	186887
8346	147958
17055	134191
2120	54388
41152	346369
6507	113551
10001	121152
24216	142097
15360	83671
10562	105841
5786	71498
9719	53110
14353	176160
9061	53818
5808	58960
5047	32598
49016	188031
76564	438586
1258	123187
36566	166245
19581	106542
22925	138784
-2209	87073
4768	86918
27611	125528
40672	206053
4390	65590
28314	116493

[truncated: 1 more sheets: Figure 6L]
