# Supplementary material for: Regulation of presynaptic Ca2+ channel abundance at active zones through a balance of delivery and turnover
Source: eLife. 2022 Jul 14;11:e78648. doi: 10.7554/eLife.78648 (PMC9352347; doi:10.7554/eLife.78648)
Supplement: Figure 7—figure supplement 1—source data 1. [file elife-78648-fig7-figsupp1-data1.xlsx]

## Sheet: Figure 7S1C
Evoked peak current				DESCRIPTIVE STATISTICS					ANOVA				MULTIPLE COMPARISONS
Control	Maple	Maple Converted			Control	Maple	Maple Converted		Table Analyzed	Data 3			Number of families	1
67.8212	61.937	47.4561		Number of values	7	7	7		Data sets analyzed	A-C			Number of comparisons per family	2
66.8104	68.995	55.7578											Alpha	0.05
69.4156	41.2519	36.6857		Minimum	43.38	40.41	36.69		ANOVA summary
59.0769	50.2175	52.0111		25% Percentile	56.13	41.25	40.84		F	2.458			Dunnett's multiple comparisons test	Mean Diff.	95.00% CI of diff.	Below threshold?	Summary
58.8645	78.846	52.9409		Median	59.08	61.94	52.01		P value	0.1138			Control vs. Maple	2.176	-11.52 to 15.88	No	ns
43.3786	40.4053	40.8428		75% Percentile	67.82	69	52.94		P value summary	ns			Control vs. Maple Converted	11.89	-1.807 to 25.59	No	ns
56.1255	64.608	52.5568		Maximum	69.42	78.85	55.76		Significant diff. among means (P < 0.05)?	No
				Range	26.04	38.44	19.07		R squared	0.2145			Test details	Mean 1	Mean 2	Mean Diff.	SE of diff.
													Control vs. Maple	60.21	58.04	2.176	5.711
				Mean	60.21	58.04	48.32		Brown-Forsythe test				Control vs. Maple Converted	60.21	48.32	11.89	5.711
				Std. Deviation	9.031	14.52	7.074		F (DFn, DFd)	1.644 (2, 18)
				Std. Error of Mean	3.413	5.489	2.674		P value	0.2209
									P value summary	ns
									Are SDs significantly different (P < 0.05)?	No
									Bartlett's test
									Bartlett's statistic (corrected)	3.057
									P value	0.2168
									P value summary	ns
									Are SDs significantly different (P < 0.05)?	No
									ANOVA table	SS	DF	MS	F (DFn, DFd)	P value
									Treatment (between columns)	561.3	2	280.6	F (2, 18) = 2.458	P=0.1138
									Residual (within columns)	2055	18	114.2
									Total	2616	20
									Data summary
									Number of treatments (columns)	3
									Number of values (total)	21

## Sheet: Figure 7S1E
Mini frequency				DESCRIPTIVE STATISTICS					ANOVA				MULTIPLE COMPARISONS
Control	Maple	Maple Converted			Control	Maple	Maple Converted		Table Analyzed	MiniFreq			Number of families	1
1	1.93333	4.33333		Number of values	7	7	7		Data sets analyzed	A-C			Number of comparisons per family	2
2.63333	2.8	3.96667											Alpha	0.05
4.13333	5.76667	3.23333		Minimum	1	1.933	3.233		ANOVA summary
2.2	4.06667	3.85714		25% Percentile	2.2	2.8	3.857		F	3.695			Dunnett's multiple comparisons test	Mean Diff.	95.00% CI of diff.	Below threshold?	Summary	Adjusted P Value	A-?
3.76667	5.53333	5.38462		Median	2.733	4.067	4.333		P value	0.0452			Control vs. Maple	-1.129	-2.535 to 0.2779	No	ns	0.1236	B	Maple
3	2.96774	4.7		75% Percentile	3.767	5.533	4.767		P value summary	*			Control vs. Maple Converted	-1.539	-2.946 to -0.1326	Yes	*	0.0316	C	Maple Converted
2.73333	4.3	4.76667		Maximum	4.133	5.767	5.385		Significant diff. among means (P < 0.05)?	Yes
				Range	3.133	3.833	2.151		R squared	0.2911			Test details	Mean 1	Mean 2	Mean Diff.	SE of diff.	n1	n2	q	DF
													Control vs. Maple	2.781	3.91	-1.129	0.5864	7	7	1.925	18
				Mean	2.781	3.91	4.32		Brown-Forsythe test				Control vs. Maple Converted	2.781	4.32	-1.539	0.5864	7	7	2.625	18
				Std. Deviation	1.031	1.431	0.7068		F (DFn, DFd)	1.573 (2, 18)
				Std. Error of Mean	0.3898	0.5409	0.2671		P value	0.2347
									P value summary	ns
									Are SDs significantly different (P < 0.05)?	No
									Bartlett's test
									Bartlett's statistic (corrected)	2.635
									P value	0.2678
									P value summary	ns
									Are SDs significantly different (P < 0.05)?	No
									ANOVA table	SS	DF	MS	F (DFn, DFd)	P value
									Treatment (between columns)	8.895	2	4.447	F (2, 18) = 3.695	P=0.0452
									Residual (within columns)	21.67	18	1.204
									Total	30.56	20
									Data summary
									Number of treatments (columns)	3
									Number of values (total)	21

## Sheet: Figure 7S1F
Single AZ Red Cac (day 1 vs 5, 3 replicates, T10/T20/T30 analysis protocols)																			DESCRIPTIVE STATISTICS
D1R1 (T10)	D5R1 (T10)	D1R1 (T20)	D5R1 (T20)	D1R1 (T30)	D5R1 (T30)	D1R2 (T10)	D5R2 (T10)	D1R2 (T20)	D5R2 (T20)	D1R2 (T30)	D5R2 (T30)	D1R3 (T10)	D5R3 (T10)	D1R3 (T20)	D5R3 (T20)	D1R3 (T30)	D5R3 (T30)			D1R1 (T10)	D5R1 (T10)	D1R1 (T20)	D5R1 (T20)	D1R1 (T30)	D5R1 (T30)	D1R2 (T10)	D5R2 (T10)	D1R2 (T20)	D5R2 (T20)	D1R2 (T30)	D5R2 (T30)	D1R3 (T10)	D5R3 (T10)	D1R3 (T20)	D5R3 (T20)	D1R3 (T30)	D5R3 (T30)
219562	220993	219562	220993	219562	220993	215573	380909	215573	380909	215573	380909	338496	149276	338496	149276	338496	149276		Number of values	170	210	340	420	502	630	110	150	217	300	330	450	100	190	200	359	300	570
103178	152816	103178	152816	103178	152816	189340	328865	189340	328865	189340	328865	286566	147447	286566	147447	286566	147447
102263	128514	102263	128514	102263	128514	179676	196839	179676	196839	179676	196839	285705	141613	285705	141613	285705	141613		Minimum	36186	5090	9004	5090	6505	5090	103337	50897	58236	25046	29417	21363	126040	56543	64909	29663	33024	17370
101702	119733	101702	119733	101702	119733	156815	181592	156815	181592	156815	181592	244706	141035	244706	141035	244706	141035		25% Percentile	82462	51650	58162	37796	44869	28765	167106	80634	113302	64385	76082	48772	173523	122837	125671	88206	96242	59137
101596	119663	101596	119663	101596	119663	149793	173303	149793	173303	149793	173303	235925	139869	235925	139869	235925	139869		Median	120279	87048	92320	65550	74028	50950	189466	129242	149793	96969	114585	81939	191732	149217	154870	119550	126638	88567
98912	112139	98912	112139	98912	112139	144276	172568	144276	172568	144276	172568	209513	132622	209513	132622	209513	132622		75% Percentile	163245	116119	135470	93230	113728	79311	232097	182137	188344	144261	169215	117213	230369	177876	192925	155517	174609	135296
94926	107124	94926	107124	94926	107124	139196	165574	139196	165574	139196	165574	207850	121115	207850	121115	207850	121115		Maximum	306702	258091	306702	258091	306702	258091	732648	380909	732648	380909	732648	380909	358080	315388	358080	315388	358080	315388
92789	103736	92789	103736	92789	103736	135063	154596	135063	154596	135063	154596	203323	119614	203323	119614	203323	119614		Range	270516	253001	297698	253001	300197	253001	629311	330012	674412	355863	703231	359546	232040	258845	293171	285725	325056	298018
91007	99343	91007	99343	91007	99343	126856	150116	126856	150116	126856	150116	181066	99419	181066	99419	181066	99419
85097	90675	85097	90675	85097	90675	126794	149240	126794	149240	126794	149240	180324	89705	180324	89705	180324	89705		Mean	126178	88135	99885	69939	84672	59383	203159	141260	157051	110796	128356	93117	204651	154834	165709	124524	139113	99899
133492	130739	74949	84526	74949	84526	482992	156590	122705	145963	122705	145963	297719	291954	161143	87978	161143	87978		Std. Deviation	52794	48179	52259	42535	50594	40108	77370	69652	72692	63002	74888	59524	50680	46454	55409	51434	60040	53978
119892	127675	67976	78266	67976	78266	417311	121500	120964	145955	120964	145955	226936	192614	147444	78514	147444	78514		Std. Error of Mean	4049	3325	2834	2076	2258	1598	7377	5687	4935	3637	4122	2806	5068	3370	3918	2715	3466	2261
90018	113890	65390	77032	65390	77032	300514	112904	106823	139738	106823	139738	205581	187276	146808	77055	146808	77055
81356	112951	63953	76538	63953	76538	249847	104597	91669	134054	91669	134054	194842	177410	144225	75023	144225	75023
80920	103660	63397	75707	63397	75707	233739	104060	76543	128822	76543	128822	187245	176361	143686	66752	143686	66752
80834	95579	60280	70486	60280	70486	201763	96842	72855	128613	72855	128613	184184	170729	143573	66690	143573	66690
73947	94757	59786	67654	59786	67654	179746	91698	69576	119993	69576	119993	178664	169948	142862	66448	142862	66448
70852	91536	56930	65892	56930	65892	178049	85129	67129	108920	67129	108920	178520	160838	138372	65506	138372	65506
60389	91479	55365	65746	55365	65746	166049	83236	65981	106483	65981	106483	174614	157338	138260	62246	138260	62246
54613	88626	55300	65706	55300	65706	141999	80933	63825	105542	63825	105542	170728	150587	135183	61855	135183	61855
181339	181279	133492	130739	54393	58102	245820	153666	482992	156590	62759	105495	323129	283498	297719	291954	129733	58308
165690	173286	119892	127675	52469	56798	203122	100643	417311	121500	58654	101261	298085	262742	226936	192614	128521	57079
150631	158118	90018	113890	52017	56537	193684	86325	300514	112904	52697	93401	279032	254217	205581	187276	125071	56596
135763	121313	81356	112951	51865	56194	185383	84129	249847	104597	49352	92703	277975	223627	194842	177410	120936	54111
120665	114899	80920	103660	48521	55392	175881	77096	233739	104060	47989	86381	226765	216840	187245	176361	107182	53948
119688	114543	80834	95579	48451	54694	173576	76125	201763	96842	47941	86179	209573	182559	184184	170729	106938	53919
110841	108936	73947	94757	48390	52812	170267	75485	179746	91698	47412	82366	201143	173888	178664	169948	101968	48513
90756	106080	70852	91536	46236	51965	167327	71849	178049	85129	40498	80512	186898	147795	178520	160838	100924	48046
83345	103556	60389	91479	45793	49404	157142	63853	166049	83236	34369	77928	182220	147598	174614	157338	99663	45195
72014	103292	54613	88626	44407	49117	156159	61587	141999	80933	32387	55847	169216	147253	170728	150587	99474	43150
227264	29335	54179	86946	133492	130739	282492	245357	138694	76523	482992	156590	204119	184832	164042	138858	297719	291954
221921	82156	53167	78515	119892	127675	264816	229739	127071	70900	417311	121500	184482	141794	160766	138243	226936	192614
199989	71377	52492	76729	90018	113890	245823	218812	118071	70650	300514	112904	169245	125797	160236	123915	205581	187276
166252	112717	44966	74125	81356	112951	235212	217242	116989	68303	249847	104597	168461	121331	160193	120569	194842	177410
163413	129056	44487	71692	80920	103660	202863	152374	114255	67967	233739	104060	154996	115233	159479	119550	187245	176361
141637	48763	44027	69515	80834	95579	197008	130632	95350	66699	201763	96842	154960	113503	154580	116369	184184	170729
128728	23890	40392	66422	73947	94757	180850	121389	84956	66354	179746	91698	141940	103815	132117	104484	178664	169948
125534	10252	37960	66322	70852	91536	178676	103696	82398	65939	178049	85129	135322	99221	128533	102048	178520	160838
106980	44322	36868	66123	60389	91479	170015	97862	74773	64585	166049	83236	130345	94045	128430	101214	174614	157338
98063	14163	32641	65393	54613	88626	169362	89616	74114	62680	141999	80933	126040	93334	127257	283498	170728	150587
252284	73589	181339	181279	54179	86946	732648	85621	245820	153666	138694	76523	302733	173127	323129	262742	164042	138858
190779	46717	165690	173286	53167	78515	334373	82537	203122	100643	127071	70900	234441	157276	298085	254217	160766	138243
143211	39703	150631	158118	52492	76729	233552	79738	193684	86325	118071	70650	233509	131731	279032	223627	160236	123915
108164	44731	135763	121313	44966	74125	210365	71984	185383	84129	116989	68303	225258	115165	277975	216840	160193	120569
93764	31464	120665	114899	44487	71692	207883	70597	175881	77096	114255	67967	211507	107101	226765	182559	159479	119550
93450	20772	119688	114543	44027	69515	190897	67300	173576	76125	95350	66699	211079	102059	209573	173888	154580	116369
90017	50448	110841	108936	40392	66422	171291	65906	170267	75485	84956	66354	196825	99471	201143	147795	132117	104484
87950	99085	90756	106080	37960	66322	169166	65381	167327	71849	82398	65939	177190	96359	186898	147598	128533	102048
81571	26433	83345	103556	36868	66123	166441	56459	157142	63853	74773	64585	176416	89973	182220	147253	128430	101214
78286	54109	72014	103292	32641	65393	164234	54658	156159	61587	74114	62680	159085	89423	169216	139786	127257	96985
217429	157826	68622	92179	30107	63129	263235	157364	141863	59930	65649	59787	215566	315388	154779	135308	122384	93847
195313	151739	68252	89482	27558	62243	249605	115385	126842	56657	61735	57738	195539	281140	151792	118104	115659	88275
117550	149235	64450	87989	27535	59828	242538	103284	123308	56120	61576	56643	175301	237613	148777	116769	114175	86284
113678	131655	57538	86949	26488	58844	208013	81671	120425	52119	61355	53062	173159	229946	142595	114590	109505	85931
108476	126407	56559	84506	25916	57567	202321	77256	101772	49213	47382	51719	172727	200489	141599	101152	108335	82303
107915	118111	54712	81519	25140	56686	188544	68493	101347	45404	41479	51479	171857	185893	140716	84303	106015	72084
100874	112229	44181	80100	24468	55954	183034	66024	97738	43393	37599	47780	142430	183260	138017	83911	101879	69290
94744	102898	43721	78483	23300	54160	182694	65392	95812	41875	36168	43865	137062	176171	123867	77137	98298	68432
93311	102727	41597	78362	22198	51753	182392	64995	85304	40320	33568	42467	130142	171261	120525	62688	96006	66269
91142	96242	39079	78290	19249	50222	176502	64686	84758	40112	29417	41981	126335	168008	109374	184832	94235	66066
160693	116183	227264	29335	181339	181279	290666	224894	282492	245357	245820	153666	309756	273772	204119	141794	323129	283498
150190	106755	221921	82156	165690	173286	290046	143780	264816	229739	203122	100643	272049	244017	184482	125797	298085	262742
143391	100799	199989	71377	150631	158118	253268	128167	245823	218812	193684	86325	267142	194302	169245	121331	279032	254217
137027	89208	166252	112717	135763	121313	244317	118436	235212	217242	185383	84129	234796	190935	168461	115233	277975	223627
131853	85145	163413	129056	120665	114899	232033	115548	202863	152374	175881	77096	207822	187620	154996	113503	226765	216840
121394	82606	141637	48763	119688	114543	219844	83857	197008	130632	173576	76125	197500	183270	154960	103815	209573	182559
119096	80993	128728	23890	110841	108936	216554	79501	180850	121389	170267	75485	194118	178995	141940	99221	201143	173888
117374	76374	125534	10252	90756	106080	208886	76697	178676	103696	167327	71849	189346	175578	135322	94045	186898	147795
113517	68950	106980	44322	83345	103556	201301	70125	170015	97862	157142	63853	186561	172999	130345	93334	182220	147598
109306	62278	98063	14163	72014	103292	197983	69256	169362	89616	156159	61587	174886	170132	126040	93327	169216	147253
95219	132143	96447	30123	68622	92179	268760	287332	165082	87337	141863	59930	246214	170027	119724	88717	154779	139786
73117	129976	88943	18640	68252	89482	232290	201773	155379	86134	126842	56657	231513	164394	118234	82621	151792	135308
66777	113165	78507	75703	64450	87989	217344	171407	150925	82471	123308	56120	212746	148410	115800	60235	148777	118104
51690	105341	78250	57932	57538	86949	205953	150340	138054	69276	120425	52119	201737	143582	106704	41472	142595	116769
51168	101340	75062	20377	56559	84506	192274	134019	130434	63708	101772	49213	183893	134475	99574	35558	141599	114590
49244	89948	70933	70568	54712	81519	189591	113851	126368	58349	101347	45404	183669	133735	97762	33709	140716	101152
42321	84119	69452	107932	44181	80100	187341	107878	123768	54096	97738	43393	177845	131679	95429	32715	138017	84303
37996	83302	65876	48934	43721	78483	178590	103393	122337	50175	95812	41875	150214	131143	82582	31925	123867	83911
36548	81204	63765	61784	41597	78362	132572	92944	118851	48823	85304	40320	136311	123632	75146	29663	120525	77137
36186	79210	62127	127739	39079	78290	131996	90891	116538	48625	84758	40112	131814	123239	64909	173127	109374	62688
209054	190946	252284	73589	38931	77410	298372	85706	732648	85621	83117	39520	358080	249221	302733	157276	107381	58752
110401	166419	190779	46717	37758	71405	257011	84057	334373	82537	82172	38908	297839	203361	234441	131731	105704	56098
84341	146851	143211	39703	37141	66718	250099	72454	233552	79738	81483	36733	247105	164179	233509	115165	103328	52635
79574	129247	108164	44731	36340	66145	244900	68926	210365	71984	78392	35709	235676	149781	225258	107101	103052	50391
77251	116097	93764	31464	29800	64310	238670	67057	207883	70597	76542	33926	221679	148395	211507	102059	100838	48880
73617	115456	93450	20772	29319	64201	225767	66166	190897	67300	74953	33619	208166	126179	211079	99471	100301	47757
67508	115019	90017	50448	28714	63482	219600	61278	171291	65906	72096	31453	184494	125481	196825	96359	99995	45433
65499	105194	87950	99085	28249	58643	213526	55091	169166	65381	66913	28954	183622	124864	177190	89973	99470	45054
52545	104219	81571	26433	27440	53690	179089	51811	166441	56459	56703	28799	177372	121002	176416	89423	92756	44157
52188	83055	78286	54109	26974	53593	170700	50897	164234	54658	55036	26086	174823	111248	159085	85818	90870	43911
273351	34754	75065	18978	227264	29335	212785	329340	163239	46916	282492	245357	312396	260342	141745	79878	204119	184832
189670	5622	74955	96394	221921	82156	210341	229064	163169	46202	264816	229739	271689	209855	140678	78047	184482	141794
163948	5255	72331	25028	199989	71377	203999	223618	163121	45111	245823	218812	221361	167419	124998	71046	169245	125797
156710	30209	69669	82744	166252	112717	201959	219458	136682	44734	235212	217242	197163	164757	124198	70088	168461	121331
147644	7004	65767	13102	163413	129056	188143	170599	130625	43879	202863	152374	188660	158729	118518	68997	154996	115233
147234	5090	57092	47245	141637	48763	174657	156739	128522	43691	197008	130632	184547	155617	95558	61080	154960	113503
146479	7755	51040	69128	128728	23890	173138	152550	123099	38829	180850	121389	167803	127279	87316	60168	141940	103815
142901	6715	46018	52962	125534	10252	149079	132995	117110	37613	178676	103696	164081	116590	85399	57614	135322	99221
138080	7790	43139	11551	106980	44322	136399	130317	110411	34646	170015	97862	158080	113358	83301	56296	130345	94045
136387	48651	42324	71698	98063	14163	132558	125328	102556	31986	169362	89616	155933	111186	80486	315388	126040	93334
219818	255499	217429	157826	96447	30123	182364	171623	263235	157364	165082	87337		284379	215566	281140	119724	93327
200231	223502	195313	151739	88943	18640	160520	111398	249605	115385	155379	86134		200190	195539	237613	118234	88717
183602	158651	117550	149235	78507	75703	124471	106321	242538	103284	150925	82471		193253	175301	229946	115800	82621
176940	153429	113678	131655	78250	57932	119968	97820	208013	81671	138054	69276		192092	173159	200489	106704	60235
172024	148632	108476	126407	75062	20377	115483	97096	202321	77256	130434	63708		183126	172727	185893	99574	41472
167704	129770	107915	118111	70933	70568	114914	77291	188544	68493	126368	58349		157026	171857	183260	97762	35558
163189	122042	100874	112229	69452	107932	109271	71523	183034	66024	123768	54096		152054	142430	176171	95429	33709
162781	120786	94744	102898	65876	48934	108752	70271	182694	65392	122337	50175		148971	137062	171261	82582	32715
150181	115471	93311	102727	63765	61784	105444	61792	182392	64995	118851	48823		135292	130142	168008	75146	31925
138172	109770	91142	96242	62127	127739	103337	59973	176502	64686	116538	48625		127850	126335	164728	64909	29663
115399	102946	82938	87323	59069	42286		323627	153619	59398	102762	45257		219379	122617	161806	63459	29345
82759	77807	77660	80717	59011	56509		301308	153438	52046	101535	44165		209910	116575	156118	62411	29027
75088	76718	75567	70573	56612	40827		271598	130458	47253	98317	40441		203153	116335	154996	55675	28092
72637	74429	71463	66212	55260	83043		261789	127547	42528	97937	38488		197562	115581	151490	55280	26883
70717	70112	58906	66099	53788	32629		212492	124116	40539	97440	37205		185097	112654	139688	46927	26847
65546	61784	54523	65791	53011	35138		209831	115325	37171	95773	37016		174363	112261	137992	43614	24200
61905	49833	53486	65708	52574	30551		208582	112407	34420	93893	35020		160150	106239	134676	42696	22263
59259	46680	44637	62986	51716	40820		172216	107264	32214	80651	34806		150016	103556	129722	42325	21427
58125	42888	42336	62838	51664	78437		166736	105577	30840	78371	34014		144282	103415	129484	36879	20277
48318	37279	40782	60718	50168	30133		151599	105207	25046	77781	33931		143587	98054	273772	33024	20270
174751	100610	160693	116183	252284	73589		267829	244317	224894	732648	85621		237187	309756	244017	302733	173127
158271	89834	150190	106755	190779	46717		262448	232033	143780	334373	82537		229502	272049	194302	234441	157276
142459	85242	143391	100799	143211	39703		240285	219844	128167	233552	79738		203320	267142	190935	233509	131731
141391	67490	137027	89208	108164	44731		228567	216554	118436	210365	71984		196064	234796	187620	225258	115165
129899	66942	131853	85145	93764	31464		214691	208886	115548	207883	70597		194635	207822	183270	211507	107101
127791	64282	121394	82606	93450	20772		214052	201301	83857	190897	67300		177503	197500	178995	211079	102059
126388	62756	119096	80993	90017	50448		194287	197983	79501	171291	65906		168671	194118	175578	196825	99471
123402	61664	117374	76374	87950	99085		166581	170748	76697	169166	65381		164473	189346	172999	177190	96359
111399	57331	113517	68950	81571	26433		151823	168626	70125	166441	56459		160352	186561	170132	176416	89973
109707	57002	109306	62278	78286	54109		150803	162948	69256	164234	54658		149849	174886	168129	159085	89423
117692	148089	106536	58035	75065	18978		262018	162847	69085	163239	46916		195823	174593	153265	141745	85818
84285	133290	88271	52232	74955	96394		237058	162495	68759	163169	46202		190636	169795	145435	140678	79878
74596	126517	77346	47537	72331	25028		222246	162109	64318	163121	45111		169154	166357	143947	124998	78047
72304	115699	75715	45108	69669	82744		217022	155756	59475	136682	44734		144501	163837	141472	124198	71046
71473	102713	75102	43786	65767	13102		194067	150261	55675	130625	43879		139646	152029	115250	118518	70088
65452	99869	74108	42270	57092	47245		180557	136684	54051	128522	43691		110263	131657	111965	95558	68997
61516	83352	73040	40549	51040	69128		174918	126554	53258	123099	38829		84188	129170	100826	87316	61080
55574	82505	60600	40512	46018	52962		166091	268760	49383	117110	37613		65912	126941	89408	85399	60168
54761	58477	58993	38305	43139	11551		159535	232290	47158	110411	34646		57351	124137	87649	83301	57614
54188	58152	58274	34889	42324	71698		151606	217344	43092	102556	31986		56543	124107	170027	80486	56296
306702	258091	95219	132143	40103	38628		195873	205953	287332	96801	31626		155517	246214	164394	80170	53138
177091	165602	73117	129976	38827	10835		195553	192274	201773	86822	30235		142080	231513	148410	79593	49787
173593	155831	66777	113165	38647	18304		192955	189591	171407	76458	29805		138571	212746	143582	78822	47410
169481	149206	51690	105341	36523	46434		183772	187341	150340	73583	28663		121632	201737	134475	75602	46772
162156	146756	51168	101340	36186	20957		180238	178590	134019	73442	27729		121290	183893	133735	71459	46045
153989	144024	49244	89948	32124	96603		177129	132572	113851	67229	27332		102402	183669	131679	66169	44934
153097	123379	42321	84119	30598	13254		170283	131996	107878	63132	27312		99100	177845	131143	63369	43441
151507	122704	37996	83302	29447	168551		147960	125228	103393	62641	27202		91059	150214	123632	63351	43179
150986	110325	36548	81204	27540	27373		145002	123761	92944	56101	25851		90177	136311	123239	58522	43127
141318	107908	36186	79210	26333	41938		127951	108566	90891	54219	25579		87582	131814	122321	58500	41912
267221	89458	24628	75991	217429	157826			105533	89812	263235	157364		175620	128568	118283	215566	315388
213676	72705	23878	73458	195313	151739			104678	89178	249605	115385		167675	127843	115819	195539	281140
206988	68166	21626	68241	117550	149235			95475	87502	242538	103284		148740	122687	106687	175301	237613
201341	56645	20240	62482	113678	131655			84524	86509	208013	81671		144670	110881	100467	173159	229946
195407	54158	16967	60828	108476	126407			82649	84921	202321	77256		139517	108966	100311	172727	200489
189948	51096	16353	57865	107915	118111			81040	84251	188544	68493		139118	108897	100253	171857	185893
182735	41921	14050	57145	100874	112229			71943	82207	183034	66024		135012	108285	98353	142430	183260
181955	41520	12790	55506	94744	102898			298372	80690	182694	65392		124264	106109	96568	137062	176171
175816	41343	10074	53906	93311	102727			257011	79840	182392	64995		111843	105015	89689	130142	171261
171246	34203	9004	52526	91142	96242			250099	79724	176502	64686		111636	100365	249221	126335	168008
196684	78830	209054	190946	82938	87323			244900	85706	153619	59398		185459	358080	203361	122617	164728
190100	60296	110401	166419	77660	80717			238670	84057	153438	52046		183145	297839	164179	116575	161806
180417	59467	84341	146851	75567	70573			225767	72454	130458	47253		170752	247105	149781	116335	156118
171586	53620	79574	129247	71463	66212			219600	68926	127547	42528		166542	235676	148395	115581	154996
171224	36606	77251	116097	58906	66099			213526	67057	124116	40539		163672	221679	126179	112654	151490
153545	36550	73617	115456	54523	65791			179089	66166	115325	37171		159809	208166	125481	112261	139688
150884	35670	67508	115019	53486	65708			170700	61278	112407	34420		151746	184494	124864	106239	137992
150498	32835	65499	105194	44637	62986			159146	55091	107264	32214		149158	183622	121002	103556	134676
147730	32116	52545	104219	42336	62838			155118	51811	105577	30840		142465	177372	111248	103415	129722
143341	31831	52188	83055	40782	60718			152983	50897	105207	25046		140661	174823	106926	98054	129484
	131441	46751	82820	40106	57223			151744	49920	101929	24918		162548	162647	95436	90993	124493
	120575	44946	77745	39752	55431			150484	47433	93163	24765		158831	148516	85159	87906	117429
	81329	44622	77256	38764	50450			136742	46934	85824	24680		153062	148451	85038	82587	116724
	69518	43359	76463	38553	50222			125625	46422	83313	23665		144060	147974	81863	80463	111255
	68255	43086	72619	37073	50107			124777	45028	83035	22802		140097	145776	79637	78787	98607
	59096	42815	63777	36269	50012			115727	38501	80356	22684		139543	144189	75951	65426	89500
	52534	40920	60617	35504	49007			114197	37972	73332	22490		132517	132393	72808	65328	87349
	51834	40732	60350	34825	47517			212785	33603	71663	21965		115665	117519	69152	62149	85235
	50961	33352	50637	34624	45108			210341	33158	71139	21522		109092	111775	68000	60528	80803
	49685	29924	49668	33181	44376			203999	31950	69930	21363		106696	110639	260342	59655	73339
	101717	273351	34754	160693	116183			201959	329340	290666	224894		150287	312396	209855	309756	273772
	86451	189670	5622	150190	106755			188143	229064	290046	143780		134724	271689	167419	272049	244017
	72351	163948	5255	143391	100799			174657	223618	253268	128167		128719	221361	164757	267142	194302
	68652	156710	30209	137027	89208			173138	219458	244317	118436		105253	197163	158729	234796	190935
	60680	147644	7004	131853	85145			149079	170599	232033	115548		103642	188660	155617	207822	187620
	59308	147234	5090	121394	82606			136399	156739	219844	83857		103242	184547	127279	197500	183270
	55265	146479	7755	119096	80993			132558	152550	216554	79501		99896	167803	116590	194118	178995
	49730	142901	6715	117374	76374			125988	132995	208886	76697		93299	164081	113358	189346	175578
	45715	138080	7790	113517	68950			122750	130317	201301	70125		87437	158080	111186	186561	172999
	42600	136387	48651	109306	62278			119217	125328	197983	69256		86299	155933	108253	174886	170132
	31035	133850	15697	106536	58035			112238	111482	170748	69085			152405	103907	174593	168129
	93865	132081	16198	88271	52232			107236	111099	168626	68759			142994	103748	169795	153265
	8951	119775	11775	77346	47537			91993	109241	162948	64318			138244	101038	166357	145435
	7913	117780	12707	75715	45108			91591	108485	162847	59475			133581	97800	163837	143947
	17988	108715	12541	75102	43786			87691	106320	162495	55675			125548	95150	152029	141472
	7231	105460	10344	74108	42270			83015	104004	162109	54051			123296	94165	131657	115250
	7388	104663	12627	73040	40549			82454	94992	155756	53258			117001	92474	129170	111965
	34921	96936	58177	60600	40512			182364	89950	150261	49383			115464	90849	126941	100826
	17936	95381	58538	58993	38305			160520	88012	136684	47158			107092	86872	124137	89408
	8472	93751	21639	58274	34889			124471	82637	126554	43092			106426	284379	124107	87649
	218918	219818	255499	58144	34031			119968	171623	121292	42243				200190	119420	85459
	183496	200231	223502	57761	33832			115483	111398	110978	41952				193253	94466	81830
	149926	183602	158651	57645	33361			114914	106321	105056	41014				192092	92161	79482
	146354	176940	153429	56504	32980			109271	97820	90767	40307				183126	87613	68819
	125639	172024	148632	55030	29308			108752	97096	82078	37121				157026	87428	66012
	118658	167704	129770	53296	27696			105444	77291	78326	35840				152054	84903	62221
	99980	163189	122042	52851	22509			103337	71523	77521	35730				148971	81402	62108
	91771	162781	120786	49125	22374			101940	70271	65383	33633				135292	79854	60518
	87610	150181	115471	48932	21818			93568	61792	60598	32885				127850	79646	59661
	86485	138172	109770	47198	21604			77888	59973	57324	31725				127261	77585	58179
		135851	109201	95219	132143			74591	54580	268760	287332				113046	246214	170027
		126334	104983	73117	129976			68004	53130	232290	201773				109028	231513	164394
		120856	102917	66777	113165			67102	52997	217344	171407				102146	212746	148410
		118853	91680	51690	105341			66016	52379	205953	150340				99663	201737	143582
		117108	91327	51168	101340			60451	51151	192274	134019				86753	183893	134475
		111502	89639	49244	89948			60409	50206	189591	113851				84931	183669	133735
		110001	89453	42321	84119			58236	48821	187341	107878				80176	177845	131679
		104558	86680	37996	83302				45751	178590	103393				71799	150214	131143
		96364	84224	36548	81204				42434	132572	92944				69526	136311	123632
		83542	83433	36186	79210				41881	131996	90891				219379	131814	123239
		115399	102946	24628	75991				323627	125228	89812				209910	128568	122321
		82759	77807	23878	73458				301308	123761	89178				203153	127843	118283
		75088	76718	21626	68241				271598	108566	87502				197562	122687	115819
		72637	74429	20240	62482				261789	105533	86509				185097	110881	106687
		70717	70112	16967	60828				212492	104678	84921				174363	108966	100467
		65546	61784	16353	57865				209831	95475	84251				160150	108897	100311
		61905	49833	14050	57145				208582	84524	82207				150016	108285	100253
		59259	46680	12790	55506				172216	82649	80690				144282	106109	98353
		58125	42888	10074	53906				166736	81040	79840				143587	105015	96568
		48318	37279	9004	52526				151599	71943	79724				134302	100365	89689
		43716	35219	6548	50972				146866	70246	77043				134143	93375	88417
		41869	30557	6505	48281				140910	67381	75396				124617	87250	87053
		40994	27229	209054	48017				134299	58649	75109				123856	87048	71136
		39147	26816	110401	47672				129560	57937	74707				123610	85395	69372
		37992	25519	84341	45889				129460	53763	73965				119050	81125	69200
		33395	25456	79574	44873				126863	53665	71514				116914	80433	65358
		33357	24507	77251	44116				126438	50201	70159				108269	74447	62257
		31199	24124	73617	39666				125091	45472	68346				102587	71502	62106
		30876	23858	67508	39216				116009	43749	66670				91933	71164	60132
		28130	23580	65499	34644				114675	43624	63668				237187	67730	53827
		174751	100610	52545	190946				267829	298372	85706				229502	358080	249221
		158271	89834	52188	166419				262448	257011	84057				203320	297839	203361
		142459	85242	46751	146851				240285	250099	72454				196064	247105	164179
		141391	67490	44946	129247				228567	244900	68926				194635	235676	149781
		129899	66942	44622	116097				214691	238670	67057				177503	221679	148395
		127791	64282	43359	115456				214052	225767	66166				168671	208166	126179
		126388	62756	43086	115019				194287	219600	61278				164473	184494	125481
		123402	61664	42815	105194				166581	213526	55091				160352	183622	124864
		111399	57331	40920	104219				151823	179089	51811				149849	177372	121002
		109707	57002	40732	83055				150803	170700	50897				142213	174823	111248
		107462	55738	33352	82820				147526	159146	49920				140827	162647	106926
		95749	54743	29924	77745				141288	155118	47433				118217	148516	95436
		91851	47158	29341	77256				139034	152983	46934				112252	148451	85159
		81321	46622	29323	76463				134963	151744	46422				110276	147974	85038
		78252	46467	26991	72619				131655	150484	45028				98777	145776	81863
		69340	45811	25471	63777				130916	136742	38501				88989	144189	79637
		68260	44356	23162	60617				129992	125625	37972				78552	132393	75951
		66320	39166	22168	60350				127953	124777	33603				78014	117519	72808
		65906	36352	20249	50637				120901	115727	33158				75604	111775	69152
		63771	34707	19832	49668				119982	114197	31950				195823	110639	68000
		117692	148089	18005	46254				262018	106788	30302				190636	102492	67674
		84285	133290	16461	46045				237058	104963	28222				169154	99549	65870
		74596	126517	273351	44971				222246	104901	27048				144501	98717	62281
		72304	115699	189670	42512				217022	97510	26131				139646	93234	60439
		71473	102713	163948	42432				194067	95721	25349				110263	92367	58521
		65452	99869	156710	40178				180557	94659	24941				84188	83505	56117
		61516	83352	147644	39374				174918	92329	24889				65912	80038	51018
		55574	82505	147234	39102				166091	85873	24206				57351	68660	50302
		54761	58477	146479	37415				159535	81531	23583				56543	66586	48301
		54188	58152	142901	34223				151606	79188	21763				54157	65908	42784
		51880	50938	138080	34754				144421	212785	329340				48422	312396	260342
		51139	49873	136387	5622				139574	210341	229064				45507	271689	209855
		51102	49608	133850	5255				125882	203999	223618				44612	221361	167419
		48062	49126	132081	30209				122694	201959	219458				38321	197163	164757
		46054	47168	119775	7004				102891	188143	170599				36759	188660	158729
		44569	45491	117780	5090				99292	174657	156739				35094	184547	155617
		44145	43791	108715	7755				99277	173138	152550				33778	167803	127279
		43852	39646	105460	6715				94959	149079	132995				33572	164081	116590
		40817	38655	104663	7790				94730	136399	130317				33069	158080	113358
		39441	38028	96936	48651				93441	132558	125328				155517	155933	111186
		306702	258091	95381	15697				195873	125988	111482				142080	152405	108253
		177091	165602	93751	16198				195553	122750	111099				138571	142994	103907
		173593	155831	93505	11775				192955	119217	109241				121632	138244	103748
		169481	149206	91915	12707				183772	112238	108485				121290	133581	101038
		162156	146756	86229	12541				180238	107236	106320				102402	125548	97800
		153989	144024	86161	10344				177129	91993	104004				99100	123296	95150
		153097	123379	80280	12627				170283	91591	94992				91059	117001	94165
		151507	122704	80240	58177				147960	87691	89950				90177	115464	92474
		150986	110325	77738	58538				145002	83015	88012				87582	107092	90849
		141318	107908	75320	21639				127951	82454	82637				82612	106426	86872
		120892	95047	73635	48142				121554	81211	81420				77930	105063	86330
		119185	94075	71742	14350				121078	79213	70130				76717	103456	79206
		118572	93949	219818	43993				116805	69831	66990				70761	99158	78232
		118303	93580	200231	12928				109781	56372	62222				68390	96950	74612
		113626	90365	183602	13770				108428	52582	60298				66308	94347	72438
		110172	82927	176940	14018				108199	51997	60188				65345	93603	67472
		107695	76388	172024	12681				107137	50015	54709				59061	92461	64155
		105411	69640	167704	45698				104319	42136	54641				57668	92382	61707
		98151	68409	163189	10566				104157	38284	54035				52576	90000	61128
		96169	68234	162781	9830				103526	36865	49059				175620	87428	60017
		267221	89458	150181	255499					182364	171623				167675		284379
		213676	72705	138172	223502					160520	111398				148740		200190
		206988	68166	135851	158651					124471	106321				144670		193253
		201341	56645	126334	153429					119968	97820				139517		192092
		195407	54158	120856	148632					115483	97096				139118		183126
		189948	51096	118853	129770					114914	77291				135012		157026
		182735	41921	117108	122042					109271	71523				124264		152054
		181955	41520	111502	120786					108752	70271				111843		148971
		175816	41343	110001	115471					105444	61792				111636		135292
		171246	34203	104558	109770					103337	59973				107162		127850
		163515	33510	96364	109201					101940	54580				91448		127261
		160075	32436	83542	104983					93568	53130				69729		113046
		157009	31922	83189	102917					77888	52997				66934		109028
		153499	30116	82451	91680					74591	52379				57766		102146
		148344	28188	81195	91327					68004	51151				57213		99663
		146875	26634	80885	89639					67102	50206				51840		86753
		145832	25357	70405	89453					66016	48821				45472		84931
		136966	24312	69469	86680					60451	45751				35635		80176
		134591	21680	69118	84224					60409	42434				34415		71799
		117716	21043	67177	83433					58236	41881				185459		69526
		196684	78830	60659	81410					56861	41168				183145		55712
		190100	60296	59646	79612					45776	39273				170752		44581
		180417	59467	115399	73031					44571	37650				166542		39670
		171586	53620	82759	72816					44263	34782				163672		38438
		171224	36606	75088	72478					43360	34617				159809		38180
		153545	36550	72637	68122					41245	32773				151746		38179
		150884	35670	70717	64932					38783	30248				149158		35880
		150498	32835	65546	62085					38731	30178				142465		35687
		147730	32116	61905	61309					34101	28720				140661		34974
		143341	31831	59259	55311					33769	27665				138106		34117
		139861	27476	58125	102946						323627				134930		219379
		126496	24323	48318	77807						301308				120062		209910
		125386	23954	43716	76718						271598				106417		203153
		121615	23142	41869	74429						261789				98312		197562
		121452	18918	40994	70112						212492				96731		185097
		120821	18894	39147	61784						209831				94805		174363
		119159	18752	37992	49833						208582				90403		160150
		115832	18331	33395	46680						172216				88206		150016
		113537	17350	33357	42888						166736				87826		144282
		110274	17249	31199	37279						151599				162548		143587
			131441	30876	35219						146866				158831		134302
			120575	28130	30557						140910				153062		134143
			81329	27471	27229						134299				144060		124617
			69518	26880	26816						129560				140097		123856
			68255	26622	25519						129460				139543		123610
			59096	23631	25456						126863				132517		119050
			52534	23498	24507						126438				115665		116914
			51834	23287	24124						125091				109092		108269
			50961	23242	23858						116009				106696		102587
			49685	22748	23580						114675				105089		91933
			48352	22235	22639						113138				104150		85841
			42941	21785	21832						111283				95785		85215
			42161	174751	21758						108428				89098		73568
			39866	158271	21590						105598				89069		71748
			39015	142459	19453						105340				79000		62132
			37719	141391	18502						104764				78924		61088
			35147	129899	18175						100821				77117		60777
			33671	127791	17749						100448				76089		55797
			33387	126388	16673						98124				75751		55006
			30048	123402	13443						96711						53918
			101717	111399	100610						267829						237187
			86451	109707	89834						262448						229502
			72351	107462	85242						240285						203320
			68652	95749	67490						228567						196064
			60680	91851	66942						214691						194635
			59308	81321	64282						214052						177503
			55265	78252	62756						194287						168671
			49730	69340	61664						166581						164473
			45715	68260	57331						151823						160352
			42600	66320	57002						150803						149849
			41750	65906	55738						147526						142213
			40913	63771	54743						141288						140827
			36629	61635	47158						139034						118217
			35036	59321	46622						134963						112252
			34546	58268	46467						131655						110276
			33889	56731	45811						130916						98777
			29348	51405	44356						129992						88989
			27513	50687	39166						127953						78552
			26564	48534	36352						120901						78014
			26380	47132	34707						119982						75604
			31035	47014	33855						106223						75254
			93865	45624	33777						105484						69645
			8951	117692	33242						102610						65775
			7913	84285	29347						100469						57223
			17988	74596	27328						99727						44718
			7231	72304	26067						99176						41842
			7388	71473	25531						98199						34851
			34921	65452	25081						97434						34777
			17936	61516	24595						92017						34200
			8472	55574	24333						90483						33500
			12350	54761	148089						262018						195823
			44617	54188	133290						237058						190636
			29110	51880	126517						222246						169154
			34838	51139	115699						217022						144501
			11308	51102	102713						194067						139646
			8449	48062	99869						180557						110263
			20439	46054	83352						174918						84188
			13059	44569	82505						166091						65912
			6186	44145	58477						159535						57351
			27007	43852	58152						151606						56543
			218918	40817	50938						144421						54157
			183496	39441	49873						139574						48422
			149926	39413	49608						125882						45507
			146354	39104	49126						122694						44612
			125639	36036	47168						102891						38321
			118658	34091	45491						99292						36759
			99980	33077	43791						99277						35094
			91771	32968	39646						94959						33778
			87610	29144	38655						94730						33572
			86485	27792	38028						93441						33069
			71747	27522	35913						92392						31515
			62035	25949	33867						89554						28346
			58783	306702	33026						83378						28330
			52755	177091	32545						82851						26017
			46025	173593	29924						82806						23758
			42996	169481	29833						82338						23685
			40916	162156	29309						82300						21780
			38830	153989	29025						78181						21261
			32724	153097	28348						77897						21243
			28781	151507	28084						74717						17370
				150986	258091						195873						155517
				141318	165602						195553						142080
				120892	155831						192955						138571
				119185	149206						183772						121632
				118572	146756						180238						121290
				118303	144024						177129						102402
				113626	123379						170283						99100
				110172	122704						147960						91059
				107695	110325						145002						90177
				105411	107908						127951						87582
				98151	95047						121554						82612
				96169	94075						121078						77930
				95566	93949						116805						76717
				90200	93580						109781						70761
				87549	90365						108428						68390
				82714	82927						108199						66308
				81995	76388						107137						65345
				80631	69640						104319						59061
				79658	68409						104157						57668
				79397	68234						103526						52576
				77429	68186						102885						50566
				76042	62878						99526						44849
				267221	62708						93530						42486
				213676	60040						92053						42297
				206988	59275						90923						42092
				201341	55322						89437						41199
				195407	55104						88651						27816
				189948	51075						85845						20891
				182735	48029						83731						20442
				181955	47728						83525						19808
				175816	89458												175620
				171246	72705												167675
				163515	68166												148740
				160075	56645												144670
				157009	54158												139517
				153499	51096												139118
				148344	41921												135012
				146875	41520												124264
				145832	41343												111843
				136966	34203												111636
				134591	33510												107162
				117716	32436												91448
				114114	31922												69729
				113877	30116												66934
				112634	28188												57766
				107375	26634												57213
				105289	25357												51840
				100113	24312												45472
				99048	21680												35635
				96282	21043												34415
				95880	20825												29441
				95609	19959												28739
				196684	18807												26641
				190100	18264												25699
				180417	16978												24231
				171586	16853												23143
				171224	14621												22751
				153545	14089												22610
				150884	13102												21789
				150498	12593												20862
				147730	78830												185459
				143341	60296												183145
				139861	59467												170752
				126496	53620												166542
				125386	36606												163672
				121615	36550												159809
				121452	35670												151746
				120821	32835												149158
				119159	32116												142465
				115832	31831												140661
				113537	27476												138106
				110274	24323												134930
				101503	23954												120062
				101207	23142												106417
				97278	18918												98312
				97034	18894												96731
				96776	18752												94805
				95411	18331												90403
				92275	17350												88206
				89489	17249												87826
				88790	15406												80834
				85640	14583												78933
					14429												78505
					14305												78105
					12710												76681
					12570												76297
					12298												75727
					10753												74846
					10044												69317
					9619												65066
					131441												162548
					120575												158831
					81329												153062
					69518												144060
					68255												140097
					59096												139543
					52534												132517
					51834												115665
					50961												109092
					49685												106696
					48352												105089
					42941												104150
					42161												95785
					39866												89098
					39015												89069
					37719												79000
					35147												78924
					33671												77117
					33387												76089
					30048												75751
					28716												72554
					27640												71894
					27579												71655
					25442												70635
					19747												62647
					19394												59162
					18943												58007
					18400												55334
					17203												54358
					14281												51968
					101717												150287
					86451												134724
					72351												128719
					68652												105253
					60680												103642
					59308												103242
					55265												99896
					49730												93299
					45715												87437
					42600												86299
					41750												84634
					40913												75104
					36629												72637
					35036												69118
					34546												65402
					33889												64154
					29348												63244
					27513												61669
					26564												60630
					26380												54860
					25946												53666
					25370												52830
					24340												52650
					24286												50258
					22898												49190
					21971												46809
					20370												46694
					19657												45084
					18815												40013
					17356												37566
					31035
					93865
					8951
					7913
					17988
					7231
					7388
					34921
					17936
					8472
					12350
					44617
					29110
					34838
					11308
					8449
					20439
					13059
					6186
					27007
					38918
					7475
					186794
					21844
					63553
					20093
					57607
					41341
					19680
					19468
					218918
					183496
					149926
					146354
					125639
					118658
					99980
					91771
					87610
					86485
					71747
					62035
					58783
					52755
					46025
					42996
					40916
					38830
					32724
					28781
					28113
					26799
					24926
					22746
					21778
					21697
					19191
					18120
					17219
					16921

## Sheet: Figure 7S1H
Average AZ red Cac-Maple per NMJ					DESCRIPTIVE STATISTICS						ANOVA			MULTIPLE COMPARISONS
C155 Control (D1) (top 30)	C155 Control (D5) (top 30)	Cac OE D1 (top 30)	Cac OE D5 (top 30)			C155 Control (D1) (top 30)	C155 Control (D5) (top 30)	Cac OE D1 (top 30)	Cac OE D5 (top 30)		Table Analyzed	Cac OE Maple		Number of families	1
1.25516	0.820976	0.835481	1.02359		Number of values	13	14	18	15		Data sets analyzed	A-D		Number of comparisons per family	3
1.14101	0.891732	1.1935	1.38677											Alpha	0.05
1.05054	0.522327	0.923535	0.816022		Minimum	0.6671	0.4589	0.4728	0.3789		ANOVA summary
	0.995234	1.32194	0.412126		25% Percentile	0.7843	0.5173	0.7145	0.5427		F	6.473		Šídák's multiple comparisons test	Mean Diff.	95.00% CI of diff.	Below threshold?	Summary	Adjusted P Value
1.02662	0.708985	0.875885	0.869407		Median	1.026	0.6173	0.8997	0.7113		P value	0.0008		C155 Control (D1) (top 30) vs. C155 Control (D5) (top 30)	0.3467	0.08244 to 0.6109	Yes	**	0.0062	A-B
0.806934	0.544726	1.10454	0.618177		75% Percentile	1.198	0.7855	1.226	0.816		P value summary	***		Cac OE D1 (top 30) vs. Cac OE D5 (top 30)	0.2841	0.04428 to 0.5240	Yes	*	0.0152	C-D
0.956638	0.494584	1.10399	0.378896		Maximum	1.421	0.9952	1.76	1.387		Significant diff. among means (P < 0.05)?	Yes		C155 Control (D5) (top 30) vs. Cac OE D5 (top 30)	-0.06257	-0.3175 to 0.1924	No	ns	0.9078	B-D
0.761661	0.542949	0.809784	0.462727		Range	0.7535	0.5363	1.287	1.008		R squared	0.2575
1.34197	0.594786	1.75981	0.542719											Test details	Mean 1	Mean 2	Mean Diff.	SE of diff.	n1	n2	t	DF
1.02581	0.502048	1.60381	0.73483		Mean	1	0.6533	1	0.7159		Brown-Forsythe test			C155 Control (D1) (top 30) vs. C155 Control (D5) (top 30)	1	0.6533	0.3467	0.1074	13	14	3.229	56
0.809699	0.63985	1.6033	0.711269		Std. Deviation	0.2407	0.1641	0.3736	0.2582		F (DFn, DFd)	2.221 (3, 56)		Cac OE D1 (top 30) vs. Cac OE D5 (top 30)	1	0.7159	0.2841	0.09745	18	15	2.916	56
0.736252	0.773719	0.611147	0.641186		Std. Error of Mean	0.06676	0.04386	0.08805	0.06665		P value	0.0957		C155 Control (D5) (top 30) vs. Cac OE D5 (top 30)	0.6533	0.7159	-0.06257	0.1036	14	15	0.6041	56
1.42059	0.655795	0.721634	0.551933								P value summary	ns
0.667125	0.458909	0.99489	0.796156								Are SDs significantly different (P < 0.05)?	No
		0.584059	0.792677
		0.692987									Bartlett's test
		0.787231									Bartlett's statistic (corrected)	9.206
		0.472804									P value	0.0267
											P value summary	*
											Are SDs significantly different (P < 0.05)?	Yes
											ANOVA table	SS	DF	MS	F (DFn, DFd)	P value
											Treatment (between columns)	1.509	3	0.5029	F (3, 56) = 6.473	P=0.0008
											Residual (within columns)	4.351	56	0.07769
											Total	5.859	59
											Data summary
											Number of treatments (columns)	4
											Number of values (total)	60
