# Supplementary material for: Regulation of presynaptic Ca2+ channel abundance at active zones through a balance of delivery and turnover
Source: eLife. 2022 Jul 14;11:e78648. doi: 10.7554/eLife.78648 (PMC9352347; doi:10.7554/eLife.78648)
Supplement: Figure 7—source data 1. [file elife-78648-fig7-data1.xlsx]

## Sheet: Figure 7B
AZ Number					DESCRIPTIVE STATISTICS						ANOVA					MULTIPLE COMPARISONS
Red (control D1)	Red (Control D5)	Day 1 (total AZs)	Day 5 (total AZs)		Number of values	17	21	17	21		Table Analyzed	Fig 7 AZ number graph				Number of families	1
65	84	69	226								Data sets analyzed	A-D				Number of comparisons per family	2
42	80	104	171		Minimum	22	38	51	99							Alpha	0.05
52	87	65	226		25% Percentile	54	49	72.5	164		ANOVA summary
94	77	75	186		Median	69	69	94	185		F	89.27				Šídák's multiple comparisons test	Mean Diff.	95.00% CI of diff.	Below threshold?	Summary	Adjusted P Value
63	66	94	156		75% Percentile	95	80	107.5	206.5		P value	<0.0001				Red (control D1) vs. Red (Control D5)	7.017	-11.79 to 25.82	No	ns	0.6363	A-B
69	69	87	190		Maximum	108	96	120	226		P value summary	****				Day 1 (total AZs) vs. Day 5 (total AZs)	-88.88	-107.7 to -70.07	Yes	****	<0.0001	C-D
74	56	94	167		Range	86	58	69	127		Significant diff. among means (P < 0.05)?	Yes
22	69	51	206								R squared	0.7881				Test details	Mean 1	Mean 2	Mean Diff.	SE of diff.	n1	n2	t	DF
50	77	76	191		Mean	72.59	65.57	90.65	179.5							Red (control D1) vs. Red (Control D5)	72.59	65.57	7.017	8.234	17	21	0.8521	72
96	55	105	204		Std. Deviation	24.41	17.37	20.4	34.38		Brown-Forsythe test					Day 1 (total AZs) vs. Day 5 (total AZs)	90.65	179.5	-88.88	8.234	17	21	10.79	72
84	85	118	164		Std. Error of Mean	5.921	3.789	4.948	7.502		F (DFn, DFd)	2.333 (3, 72)
56	46	70	133								P value	0.0812
89	72	107	211								P value summary	ns
63	61	86	207								Are SDs significantly different (P < 0.05)?	No
108	96	120	222
105	49	112	175								Bartlett's test
102	43	108	164								Bartlett's statistic (corrected)	10.23
	38		115								P value	0.0167
	49		172								P value summary	*
	80		185								Are SDs significantly different (P < 0.05)?	Yes
	38		99
											ANOVA table	SS	DF	MS	F (DFn, DFd)	P value
											Treatment (between columns)	170593	3	56864	F (3, 72) = 89.27	P<0.0001
											Residual (within columns)	45864	72	637
											Total	216458	75
											Data summary
											Number of treatments (columns)	4
											Number of values (total)	76

## Sheet: Figure 7C
Single AZ Red Cac-Maple			DESCRIPTIVE STATISTICS				T TEST
control D1	control 5			control D1	control 5		Table Analyzed	Top 30 brightest per NMJ (sum)
219562	220993		Number of values	502	630
103178	152816						Column B	control 5
102263	128514		Minimum	6505	5090		vs.	vs.
101702	119733		25% Percentile	44869	28765		Column A	control D1
101596	119663		Median	74028	50950
98912	112139		75% Percentile	113728	79311		Unpaired t test
94926	107124		Maximum	306702	258091		P value	<0.0001
92789	103736		Range	300197	253001		P value summary	****
91007	99343						Significantly different (P < 0.05)?	Yes
85097	90675		Mean	84672	59383		One- or two-tailed P value?	Two-tailed
74949	84526		Std. Deviation	50594	40108		t, df	t=9.381, df=1130
67976	78266		Std. Error of Mean	2258	1598
65390	77032						How big is the difference?
63953	76538						Mean of column A	84672
63397	75707						Mean of column B	59383
60280	70486						Difference between means (B - A) ± SEM	-25289 ± 2696
59786	67654						95% confidence interval	-30578 to -19999
56930	65892						R squared (eta squared)	0.07225
55365	65746
55300	65706						F test to compare variances
54393	58102						F, DFn, Dfd	1.591, 501, 629
52469	56798						P value	<0.0001
52017	56537						P value summary	****
51865	56194						Significantly different (P < 0.05)?	Yes
48521	55392
48451	54694						Data analyzed
48390	52812						Sample size, column A	502
46236	51965						Sample size, column B	630
45793	49404
44407	49117
133492	130739
119892	127675
90018	113890
81356	112951
80920	103660
80834	95579
73947	94757
70852	91536
60389	91479
54613	88626
54179	86946
53167	78515
52492	76729
44966	74125
44487	71692
44027	69515
40392	66422
37960	66322
36868	66123
32641	65393
30107	63129
27558	62243
27535	59828
26488	58844
25916	57567
25140	56686
24468	55954
23300	54160
22198	51753
19249	50222
181339	181279
165690	173286
150631	158118
135763	121313
120665	114899
119688	114543
110841	108936
90756	106080
83345	103556
72014	103292
68622	92179
68252	89482
64450	87989
57538	86949
56559	84506
54712	81519
44181	80100
43721	78483
41597	78362
39079	78290
38931	77410
37758	71405
37141	66718
36340	66145
29800	64310
29319	64201
28714	63482
28249	58643
27440	53690
26974	53593
227264	29335
221921	82156
199989	71377
166252	112717
163413	129056
141637	48763
128728	23890
125534	10252
106980	44322
98063	14163
96447	30123
88943	18640
78507	75703
78250	57932
75062	20377
70933	70568
69452	107932
65876	48934
63765	61784
62127	127739
59069	42286
59011	56509
56612	40827
55260	83043
53788	32629
53011	35138
52574	30551
51716	40820
51664	78437
50168	30133
252284	73589
190779	46717
143211	39703
108164	44731
93764	31464
93450	20772
90017	50448
87950	99085
81571	26433
78286	54109
75065	18978
74955	96394
72331	25028
69669	82744
65767	13102
57092	47245
51040	69128
46018	52962
43139	11551
42324	71698
40103	38628
38827	10835
38647	18304
36523	46434
36186	20957
32124	96603
30598	13254
29447	168551
27540	27373
26333	41938
217429	157826
195313	151739
117550	149235
113678	131655
108476	126407
107915	118111
100874	112229
94744	102898
93311	102727
91142	96242
82938	87323
77660	80717
75567	70573
71463	66212
58906	66099
54523	65791
53486	65708
44637	62986
42336	62838
40782	60718
40106	57223
39752	55431
38764	50450
38553	50222
37073	50107
36269	50012
35504	49007
34825	47517
34624	45108
33181	44376
160693	116183
150190	106755
143391	100799
137027	89208
131853	85145
121394	82606
119096	80993
117374	76374
113517	68950
109306	62278
106536	58035
88271	52232
77346	47537
75715	45108
75102	43786
74108	42270
73040	40549
60600	40512
58993	38305
58274	34889
58144	34031
57761	33832
57645	33361
56504	32980
55030	29308
53296	27696
52851	22509
49125	22374
48932	21818
47198	21604
95219	132143
73117	129976
66777	113165
51690	105341
51168	101340
49244	89948
42321	84119
37996	83302
36548	81204
36186	79210
24628	75991
23878	73458
21626	68241
20240	62482
16967	60828
16353	57865
14050	57145
12790	55506
10074	53906
9004	52526
6548	50972
6505	48281
209054	48017
110401	47672
84341	45889
79574	44873
77251	44116
73617	39666
67508	39216
65499	34644
52545	190946
52188	166419
46751	146851
44946	129247
44622	116097
43359	115456
43086	115019
42815	105194
40920	104219
40732	83055
33352	82820
29924	77745
29341	77256
29323	76463
26991	72619
25471	63777
23162	60617
22168	60350
20249	50637
19832	49668
18005	46254
16461	46045
273351	44971
189670	42512
163948	42432
156710	40178
147644	39374
147234	39102
146479	37415
142901	34223
138080	34754
136387	5622
133850	5255
132081	30209
119775	7004
117780	5090
108715	7755
105460	6715
104663	7790
96936	48651
95381	15697
93751	16198
93505	11775
91915	12707
86229	12541
86161	10344
80280	12627
80240	58177
77738	58538
75320	21639
73635	48142
71742	14350
219818	43993
200231	12928
183602	13770
176940	14018
172024	12681
167704	45698
163189	10566
162781	9830
150181	255499
138172	223502
135851	158651
126334	153429
120856	148632
118853	129770
117108	122042
111502	120786
110001	115471
104558	109770
96364	109201
83542	104983
83189	102917
82451	91680
81195	91327
80885	89639
70405	89453
69469	86680
69118	84224
67177	83433
60659	81410
59646	79612
115399	73031
82759	72816
75088	72478
72637	68122
70717	64932
65546	62085
61905	61309
59259	55311
58125	102946
48318	77807
43716	76718
41869	74429
40994	70112
39147	61784
37992	49833
33395	46680
33357	42888
31199	37279
30876	35219
28130	30557
27471	27229
26880	26816
26622	25519
23631	25456
23498	24507
23287	24124
23242	23858
22748	23580
22235	22639
21785	21832
174751	21758
158271	21590
142459	19453
141391	18502
129899	18175
127791	17749
126388	16673
123402	13443
111399	100610
109707	89834
107462	85242
95749	67490
91851	66942
81321	64282
78252	62756
69340	61664
68260	57331
66320	57002
65906	55738
63771	54743
61635	47158
59321	46622
58268	46467
56731	45811
51405	44356
50687	39166
48534	36352
47132	34707
47014	33855
45624	33777
117692	33242
84285	29347
74596	27328
72304	26067
71473	25531
65452	25081
61516	24595
55574	24333
54761	148089
54188	133290
51880	126517
51139	115699
51102	102713
48062	99869
46054	83352
44569	82505
44145	58477
43852	58152
40817	50938
39441	49873
39413	49608
39104	49126
36036	47168
34091	45491
33077	43791
32968	39646
29144	38655
27792	38028
27522	35913
25949	33867
306702	33026
177091	32545
173593	29924
169481	29833
162156	29309
153989	29025
153097	28348
151507	28084
150986	258091
141318	165602
120892	155831
119185	149206
118572	146756
118303	144024
113626	123379
110172	122704
107695	110325
105411	107908
98151	95047
96169	94075
95566	93949
90200	93580
87549	90365
82714	82927
81995	76388
80631	69640
79658	68409
79397	68234
77429	68186
76042	62878
267221	62708
213676	60040
206988	59275
201341	55322
195407	55104
189948	51075
182735	48029
181955	47728
175816	89458
171246	72705
163515	68166
160075	56645
157009	54158
153499	51096
148344	41921
146875	41520
145832	41343
136966	34203
134591	33510
117716	32436
114114	31922
113877	30116
112634	28188
107375	26634
105289	25357
100113	24312
99048	21680
96282	21043
95880	20825
95609	19959
196684	18807
190100	18264
180417	16978
171586	16853
171224	14621
153545	14089
150884	13102
150498	12593
147730	78830
143341	60296
139861	59467
126496	53620
125386	36606
121615	36550
121452	35670
120821	32835
119159	32116
115832	31831
113537	27476
110274	24323
101503	23954
101207	23142
97278	18918
97034	18894
96776	18752
95411	18331
92275	17350
89489	17249
88790	15406
85640	14583
	14429
	14305
	12710
	12570
	12298
	10753
	10044
	9619
	131441
	120575
	81329
	69518
	68255
	59096
	52534
	51834
	50961
	49685
	48352
	42941
	42161
	39866
	39015
	37719
	35147
	33671
	33387
	30048
	28716
	27640
	27579
	25442
	19747
	19394
	18943
	18400
	17203
	14281
	101717
	86451
	72351
	68652
	60680
	59308
	55265
	49730
	45715
	42600
	41750
	40913
	36629
	35036
	34546
	33889
	29348
	27513
	26564
	26380
	25946
	25370
	24340
	24286
	22898
	21971
	20370
	19657
	18815
	17356
	31035
	93865
	8951
	7913
	17988
	7231
	7388
	34921
	17936
	8472
	12350
	44617
	29110
	34838
	11308
	8449
	20439
	13059
	6186
	27007
	38918
	7475
	186794
	21844
	63553
	20093
	57607
	41341
	19680
	19468
	218918
	183496
	149926
	146354
	125639
	118658
	99980
	91771
	87610
	86485
	71747
	62035
	58783
	52755
	46025
	42996
	40916
	38830
	32724
	28781
	28113
	26799
	24926
	22746
	21778
	21697
	19191
	18120
	17219
	16921

## Sheet: Figure 7D
Average Cac Maple Intensity per NMJ (top 30 analyzed)									DESCRIPTIVE STATISTICS										ANOVA							MULTIPLE COMPARISONS
Control D1 (top 30)	Control D5 (top 30)	Cac Het (D1) (top 30)	Cac Het D5 (top 30)	a2d Het (D1) (top 30)	a2d Het D5 (top 30)	a2d null (D1) (top 30)	a2d null D5 (top 30)			Control D1 (top 30)	Control D5 (top 30)	Cac Het (D1) (top 30)	Cac Het D5 (top 30)	a2d Het (D1) (top 30)	a2d Het D5 (top 30)	a2d null (D1) (top 30)	a2d null D5 (top 30)		Table Analyzed	Maple data in figure 7						Number of families	1
0.845106	0.96627	1.22795	0.885039			1.11378	1.70418		Number of values	16	21	14	15	12	21	21	15		Data sets analyzed	A-H						Number of comparisons per family	4
0.589515	0.897247	1.15316	0.54258	1.22973	0.988487	1.21876	1.00646																			Alpha	0.05
0.800383	0.634198	0.990032	1.0611	1.09771	1.04149	1.09806	1.06047		Minimum	0.5023	0.3036	0.7335	0.2331	0.5536	0.5045	0.5587	0.4024		ANOVA summary
1.0998	1.05797	1.06202	1.43123	0.775202	0.872101	0.881422	0.684909		25% Percentile	0.6422	0.4395	0.9301	0.5426	0.6994	0.8799	0.8247	0.7329		F	2.615						Šídák's multiple comparisons test	Mean Diff.	95.00% CI of diff.	Below threshold?	Summary	Adjusted P Value
0.824544	0.558614	1.0686	1.57836	1.30571	1.14258	0.804167	0.979918		Median	0.919	0.6342	1.018	1.058	0.9794	1.021	0.9221	1.006		P value	0.0148						Control D1 (top 30) vs. Control D5 (top 30)	0.3132	0.05577 to 0.5706	Yes	*	0.0103	A-B
0.846822	0.933407	1.05936	1.05808	0.893321	0.908063	0.672885	0.979245		75% Percentile	1.371	0.918	1.069	1.413	1.217	1.151	1.111	1.144		P value summary	*						Cac Het (D1) (top 30) vs. Cac Het D5 (top 30)	0.02543	-0.2628 to 0.3137	No	ns	0.999	C-D
0.991164	0.609648	1.07075	1.12702	0.553563	1.17711	0.558685			Maximum	1.72	1.211	1.228	1.695	1.68	1.234	1.825	1.704		Significant diff. among means (P < 0.05)?	Yes						a2d Het (D1) (top 30) vs. a2d Het D5 (top 30)	-0.006072	-0.2868 to 0.2746	No	ns	>0.9999	E-F
0.579572	0.789252	1.0252	0.797592	1.67968	0.771916	1.82543	0.402449		Range	1.217	0.9073	0.4945	1.462	1.126	0.7295	1.267	1.302		R squared	0.126						a2d null (D1) (top 30) vs. a2d null D5 (top 30)	-0.0002555	-0.2625 to 0.2620	No	ns	>0.9999	G-H
1.36616	0.902571	0.733481	0.333698	0.895687	0.887619	1.10789	0.593452
1.37238	0.367351	0.936349	0.233068	1.06305	1.1112	0.845144			Mean	1	0.6868	1	0.9746	1	1.006	1	1		Brown-Forsythe test							Test details	Mean 1	Mean 2	Mean Diff.	SE of diff.	n1	n2	t	DF
0.502349	1.21093	0.783226	0.757957	0.652456	0.834696	1.06856	1.51443		Std. Deviation	0.3718	0.2738	0.1314	0.447	0.3238	0.1783	0.3218	0.3288		F (DFn, DFd)	3.091 (7, 127)						Control D1 (top 30) vs. Control D5 (top 30)	1	0.6868	0.3132	0.1019	16	21	3.074	127
1.01863	0.420909	0.968145	0.526965	0.674186	1.05892	0.658886	0.961257		Std. Error of Mean	0.09296	0.05975	0.03511	0.1154	0.09346	0.03891	0.07023	0.08489		P value	0.0048						Cac Het (D1) (top 30) vs. Cac Het D5 (top 30)	1	0.9746	0.02543	0.1141	14	15	0.2229	127
0.573641	0.554276	0.91128	1.6949	1.1797	1.23396	0.941259	1.04023												P value summary	**						a2d Het (D1) (top 30) vs. a2d Het D5 (top 30)	1	1.006	-0.006072	0.1111	12	21	0.05466	127
1.40894	0.67813	1.01043	1.41259		1.00774	0.582301													Are SDs significantly different (P < 0.05)?	Yes						a2d null (D1) (top 30) vs. a2d null D5 (top 30)	1	1	-0.0002555	0.1038	21	15	0.002462	127
1.71977	1.10546		1.17839		1.15955	0.966366
1.46123	0.380068				1.08661	0.909706	1.14364												Bartlett's test
	0.303642				1.21386	0.8802	0.73289												Bartlett's statistic (corrected)	26.47
	0.476734				1.23067	1.48065	1.17553												P value	0.0004
	0.458012				0.866885	1.59445	1.02477												P value summary	***
	0.35224				1.00843	0.922128													Are SDs significantly different (P < 0.05)?	Yes
	0.766619				1.02117	0.869272
					0.50446														ANOVA table	SS	DF	MS	F (DFn, DFd)	P value
																			Treatment (between columns)	1.725	7	0.2464	F (7, 127) = 2.615	P=0.0148
																			Residual (within columns)	11.97	127	0.09424
																			Total	13.69	134
																			Data summary
																			Number of treatments (columns)	8
																			Number of values (total)	135
