# Supplementary material for: Regulation of presynaptic Ca2+ channel abundance at active zones through a balance of delivery and turnover
Source: eLife journal article supplement (doi:10.7554/elife.78648), 2022-07-14

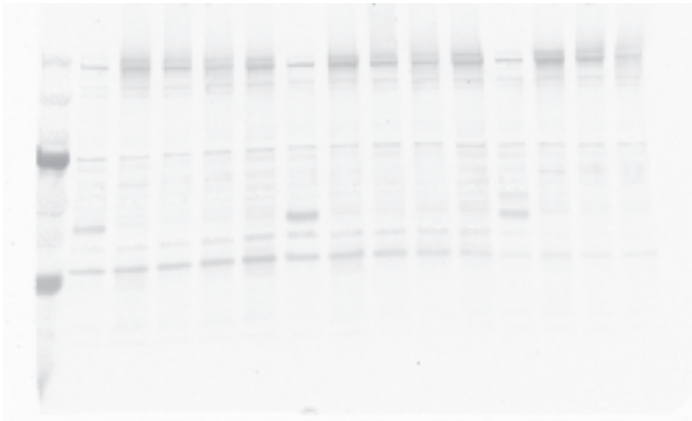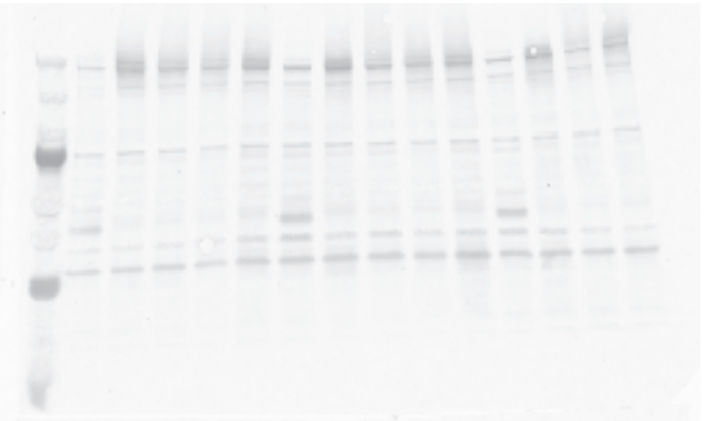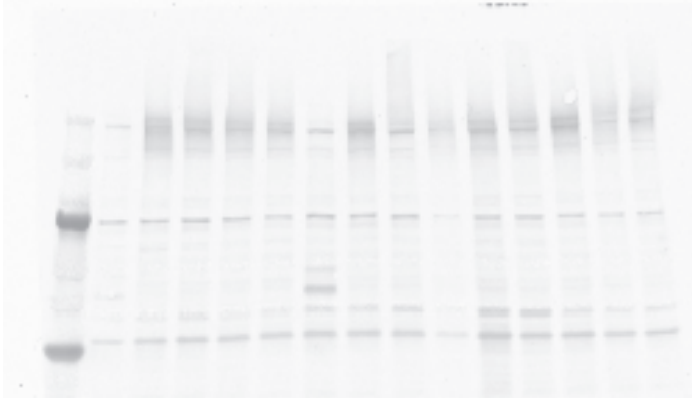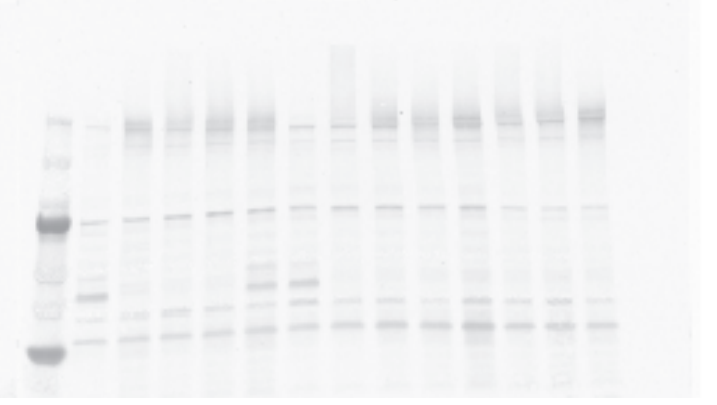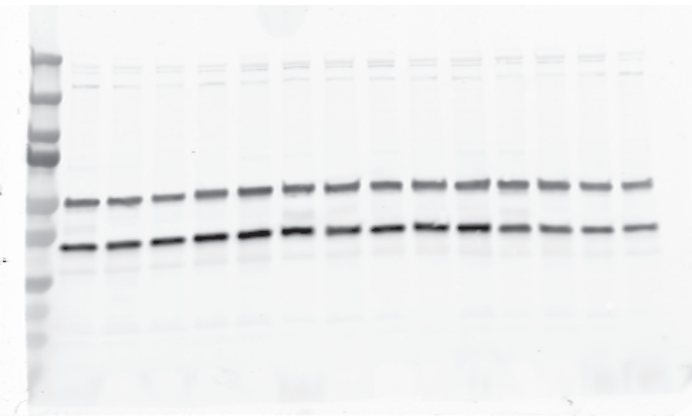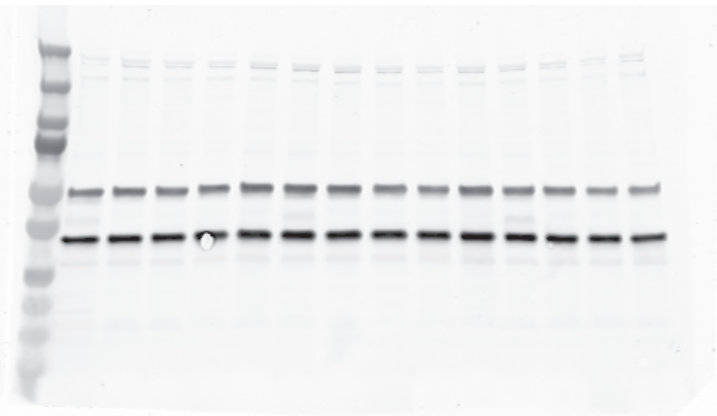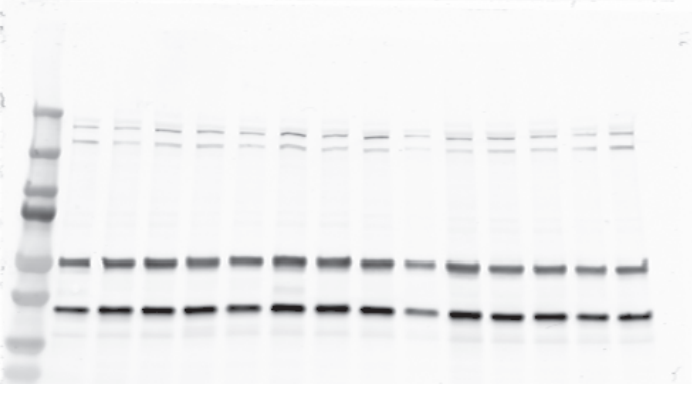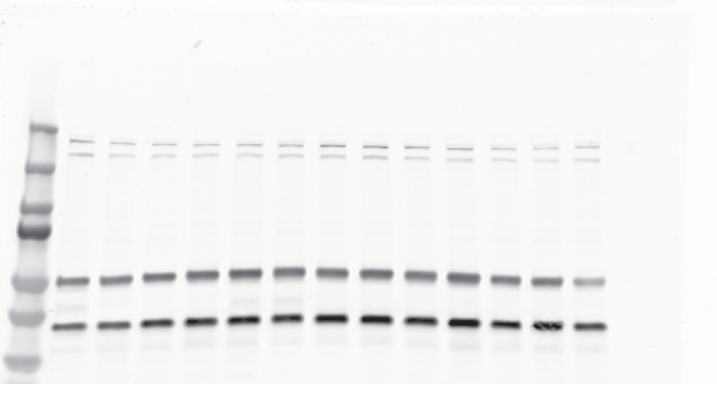

Supplement: supp [file elife-78648-supp-v1.zip]
