# Supplementary material for: Regulation of presynaptic Ca2+ channel abundance at active zones through a balance of delivery and turnover
Source: eLife journal article supplement (doi:10.7554/elife.78648), 2022-07-14
Supplement: supp [file elife-78648-supp-v1.zip]

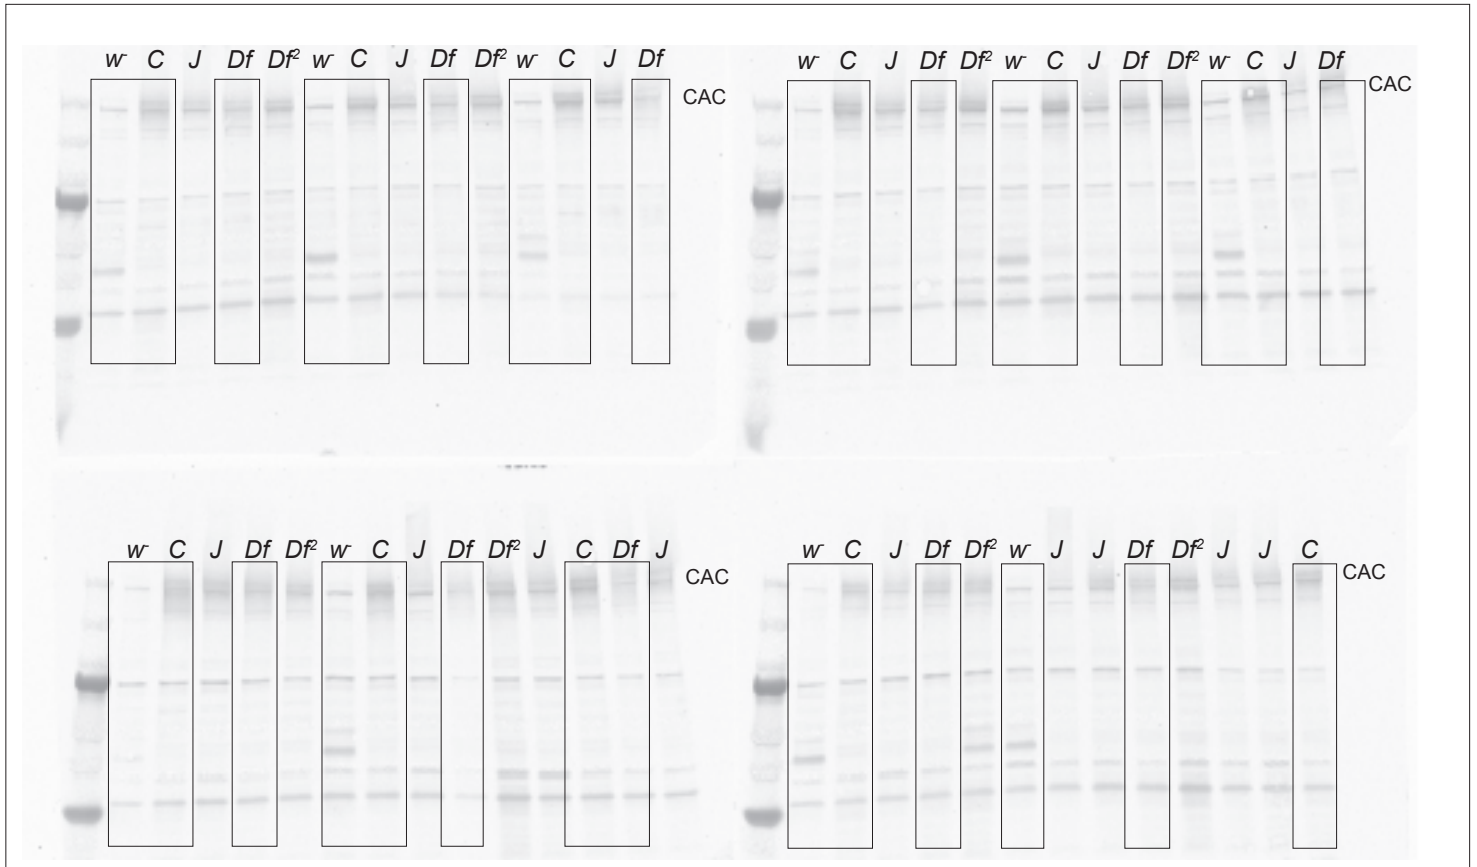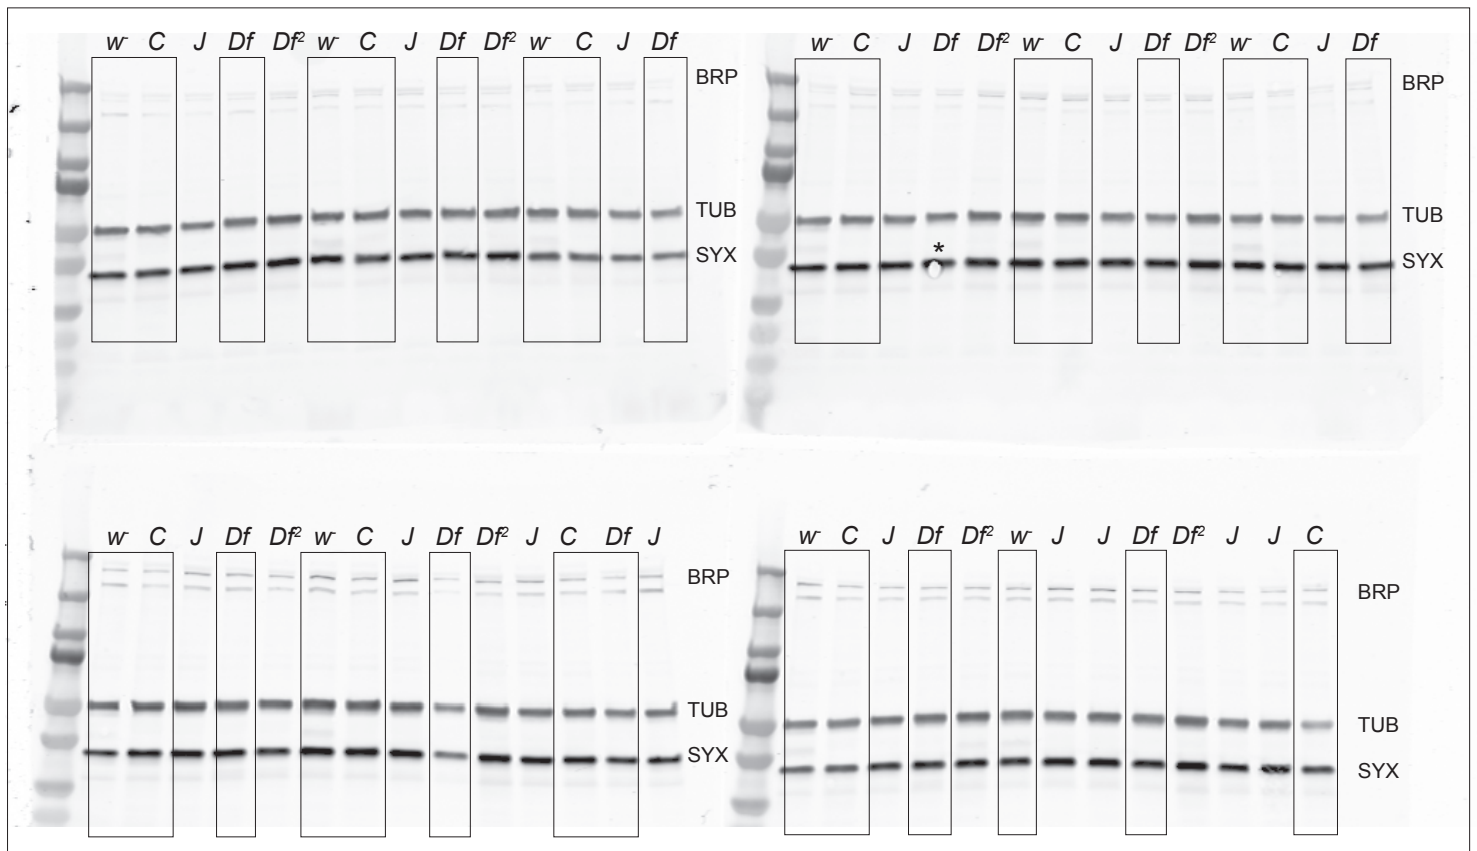

Boxed lanes were analyzed. Letter above lane indicates genotype: *w* (negative control without *Cac*-GFP), *C* (Control *Cac*<sup>GFP</sup>), *J* (*Cac*<sup>J/GFP</sup> truncation heterozygote, not used in this study) *Df* (*Cac*<sup>Df/GFP</sup> heterozygote, used in this study) *Df*<sup>2</sup> (A second *Cac* deficiency heterozygote, not used in this study). All *Cac*-GFP bands were quantified, and all Syntaxin bands were quantified with the exception of the band marked by an asterisk, in which a bubble prevented accurate quantification of the band. negative controls were used as background subtraction.
