# Supplementary figures and images for: Regulation of presynaptic Ca2+ channel abundance at active zones through a balance of delivery and turnover
Source: eLife journal article supplement (doi:10.7554/elife.78648), 2022-07-14

Figure 6 - figure supplement 1

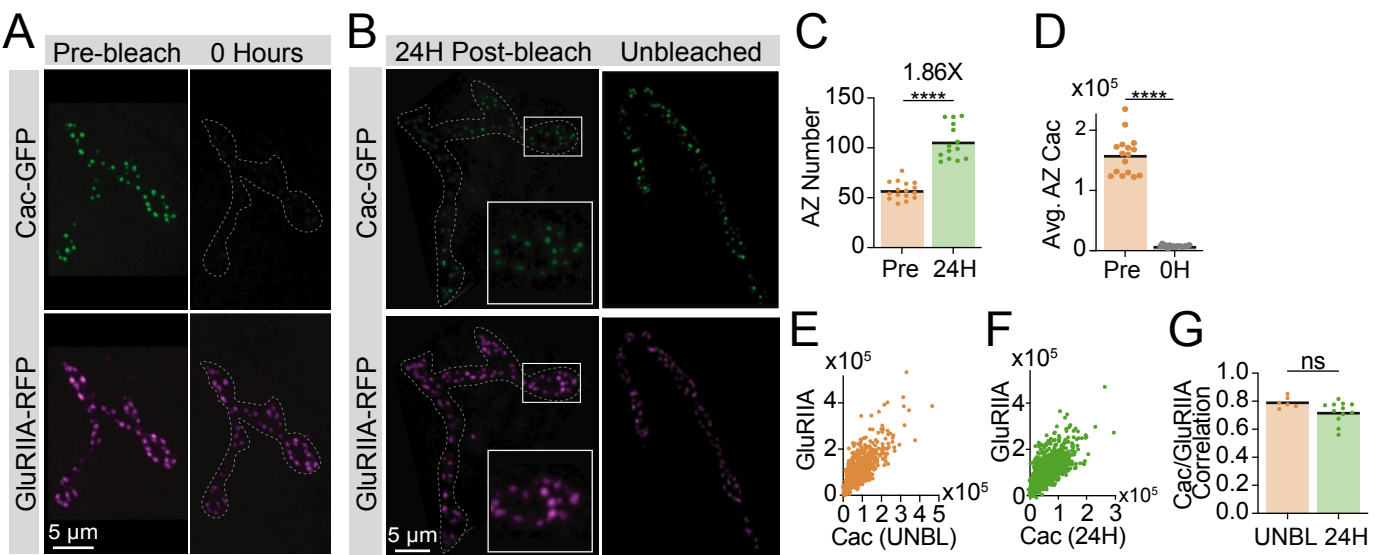

Supplement: supp [file elife-78648-supp-v1.zip]

Figure 1 - figure supplement 1

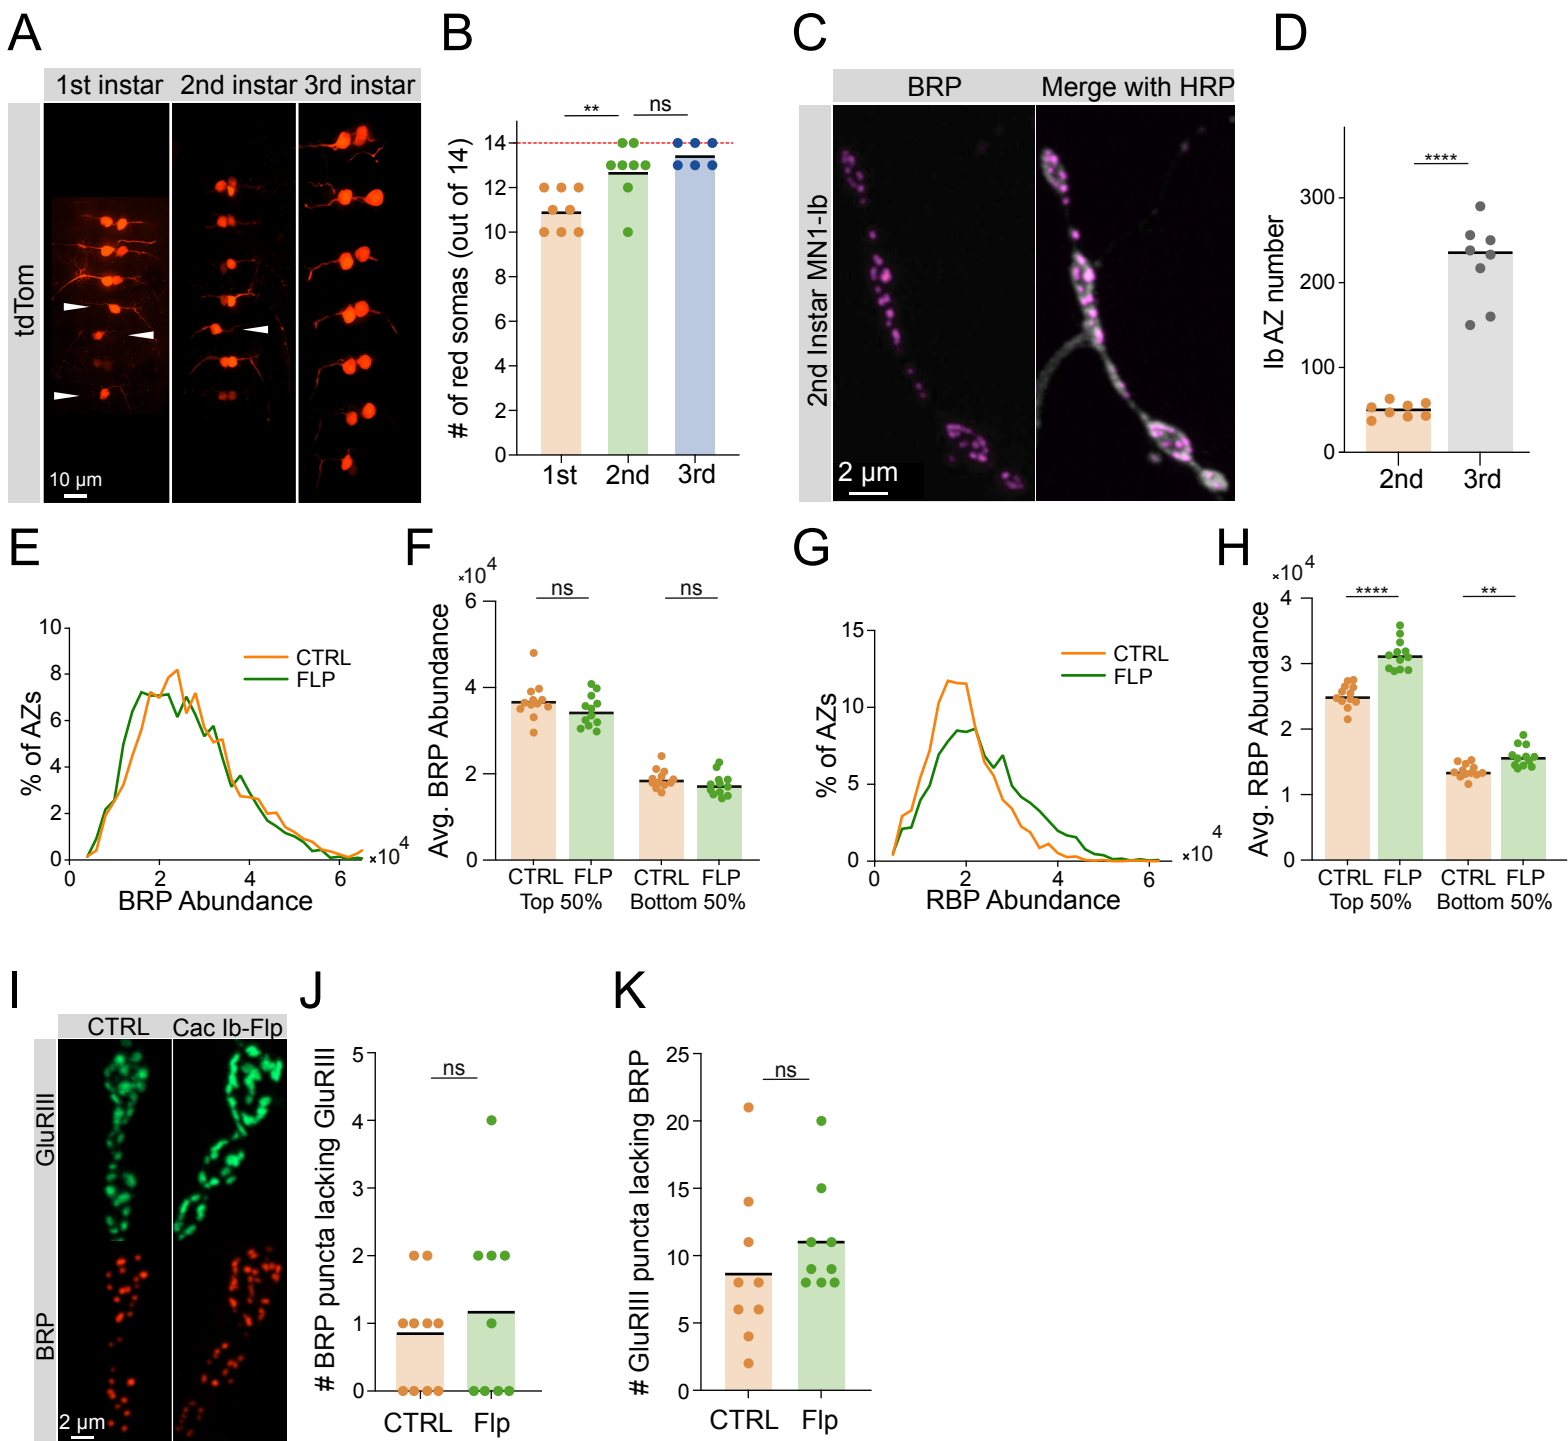

Supplement: supp [file elife-78648-supp-v1.zip]

Figure 3 - figure supplement 1

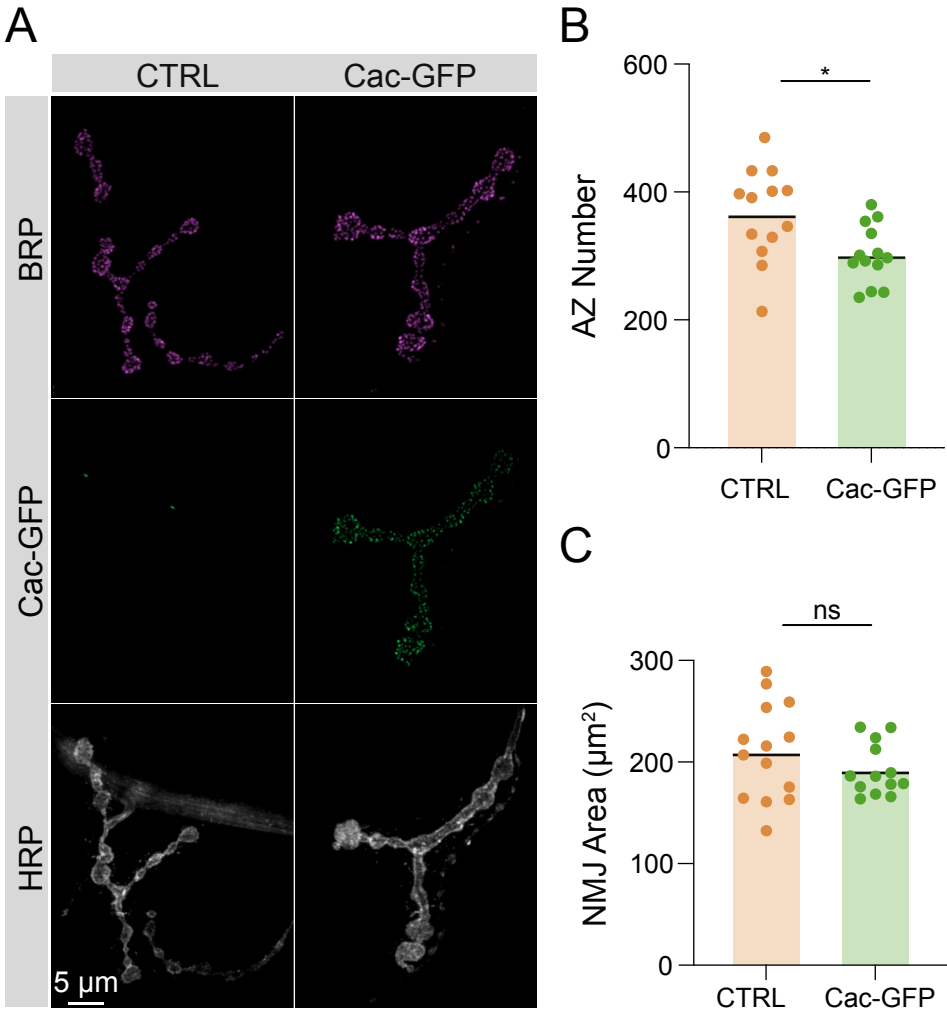

Supplement: supp [file elife-78648-supp-v1.zip]

Figure 5 - figure supplement 1

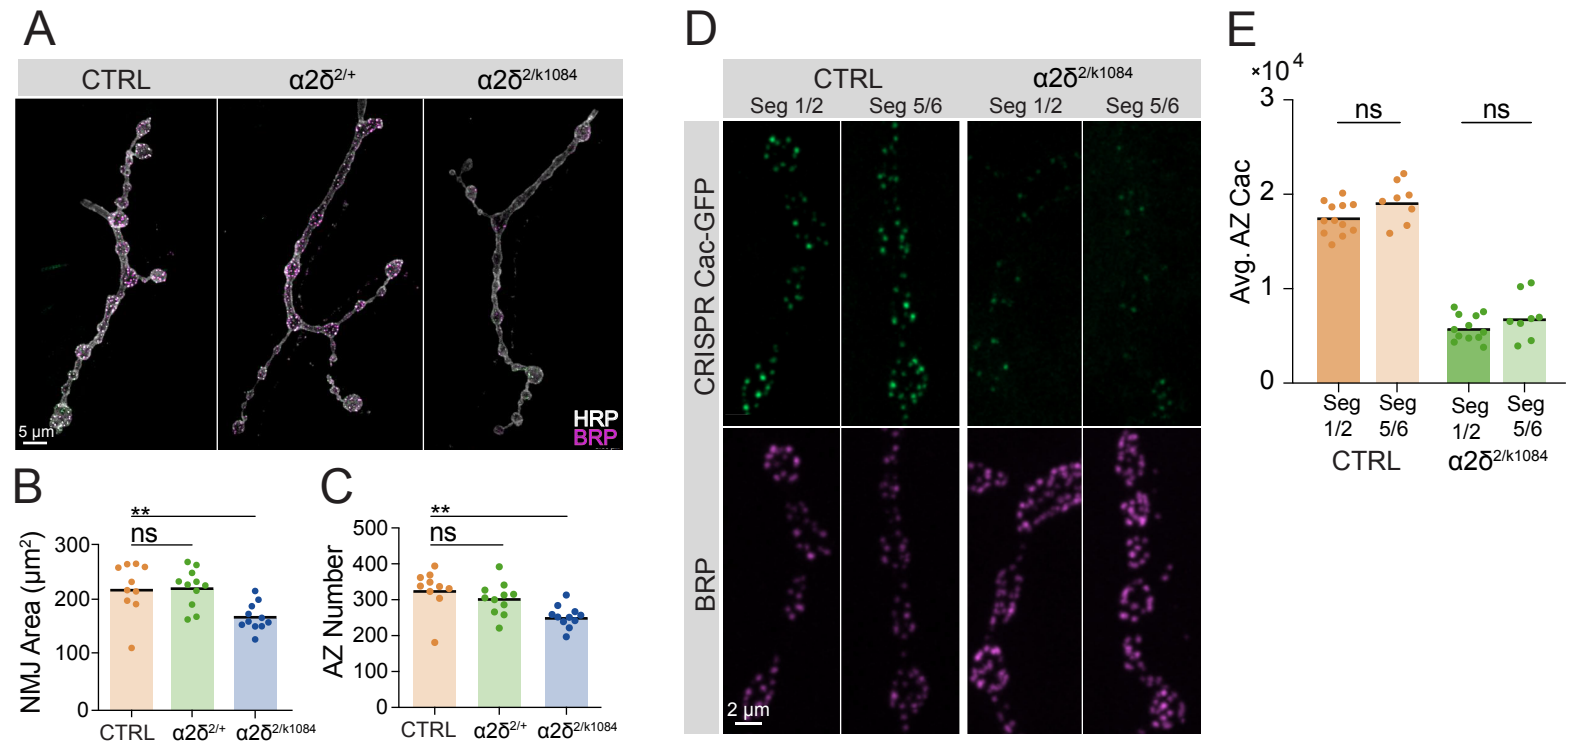

Supplement: supp [file elife-78648-supp-v1.zip]

Figure 4 - figure supplement 1

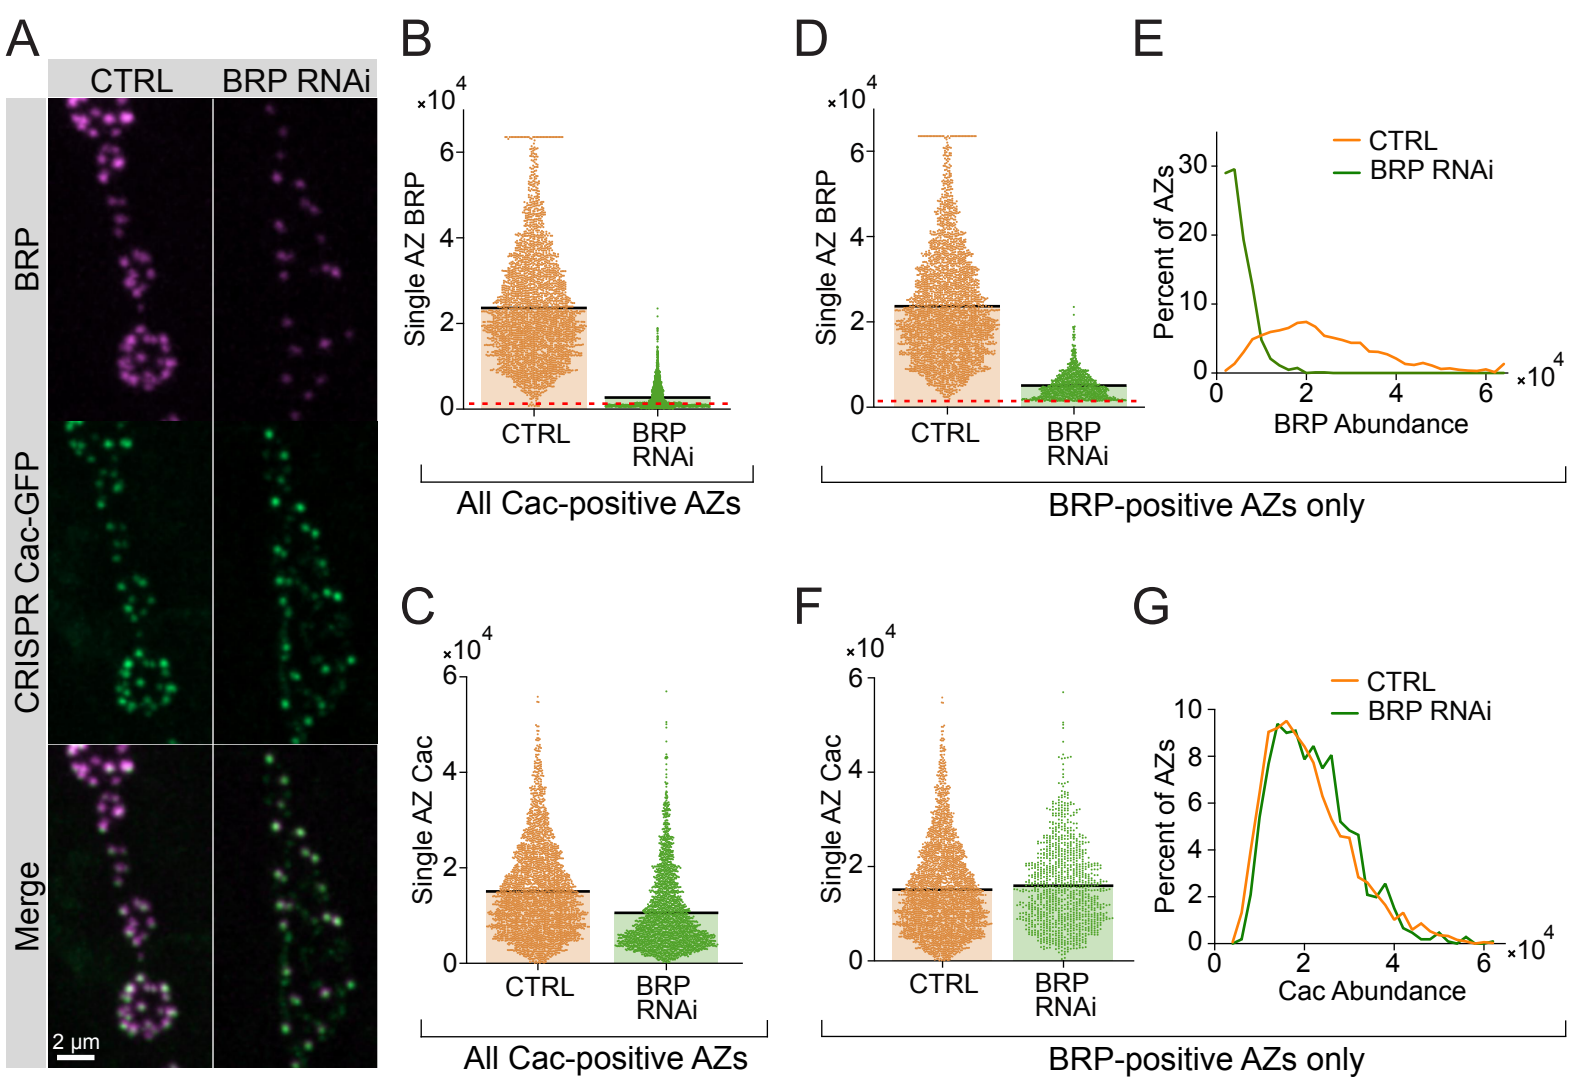

Supplement: supp [file elife-78648-supp-v1.zip]

Control

BRP RNAi

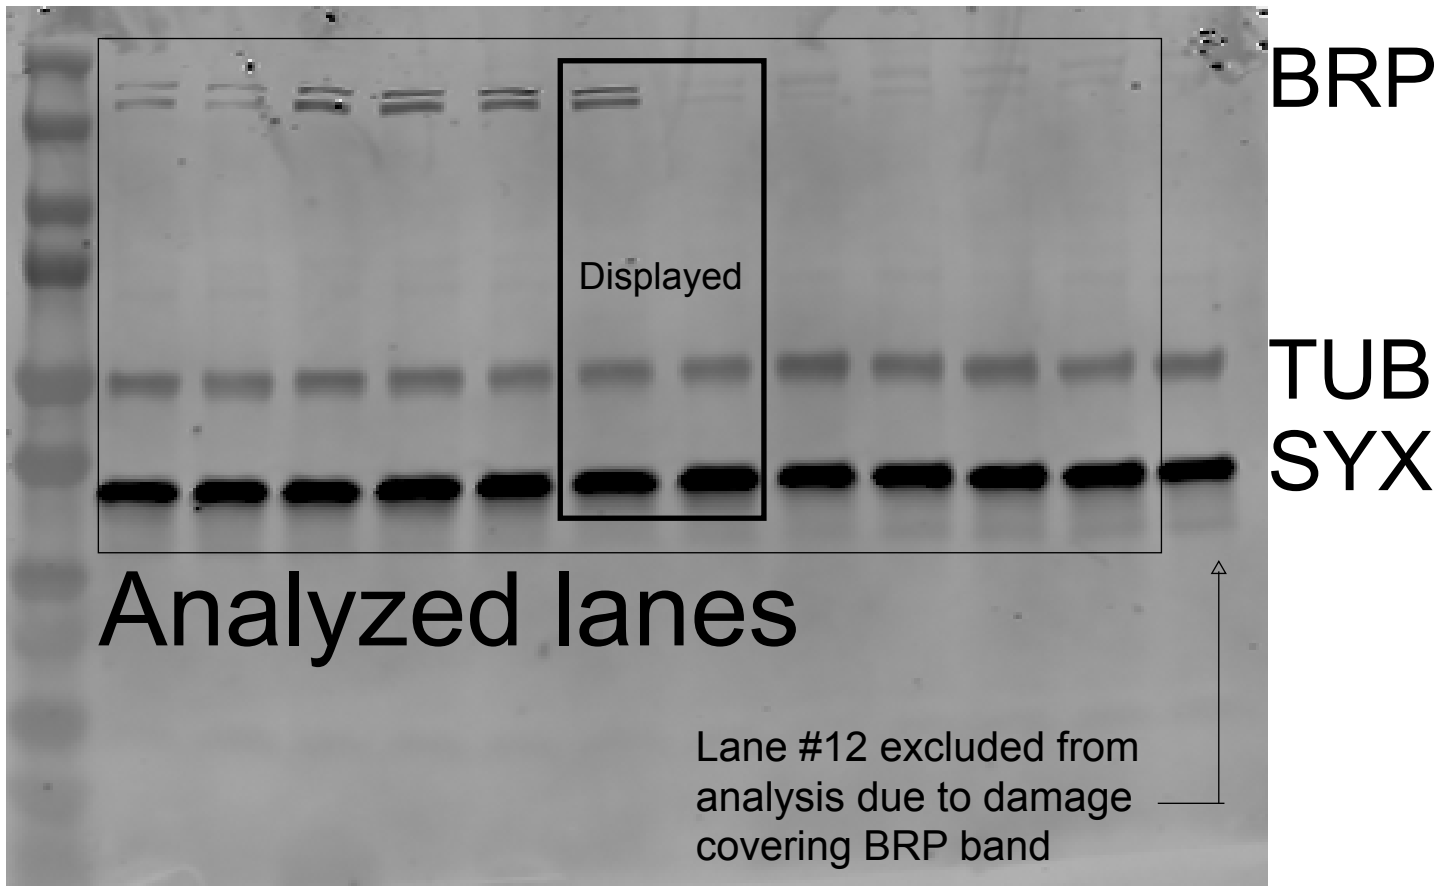

Supplement: supp [file elife-78648-supp-v1.zip]

Figure 3 - figure supplement 2

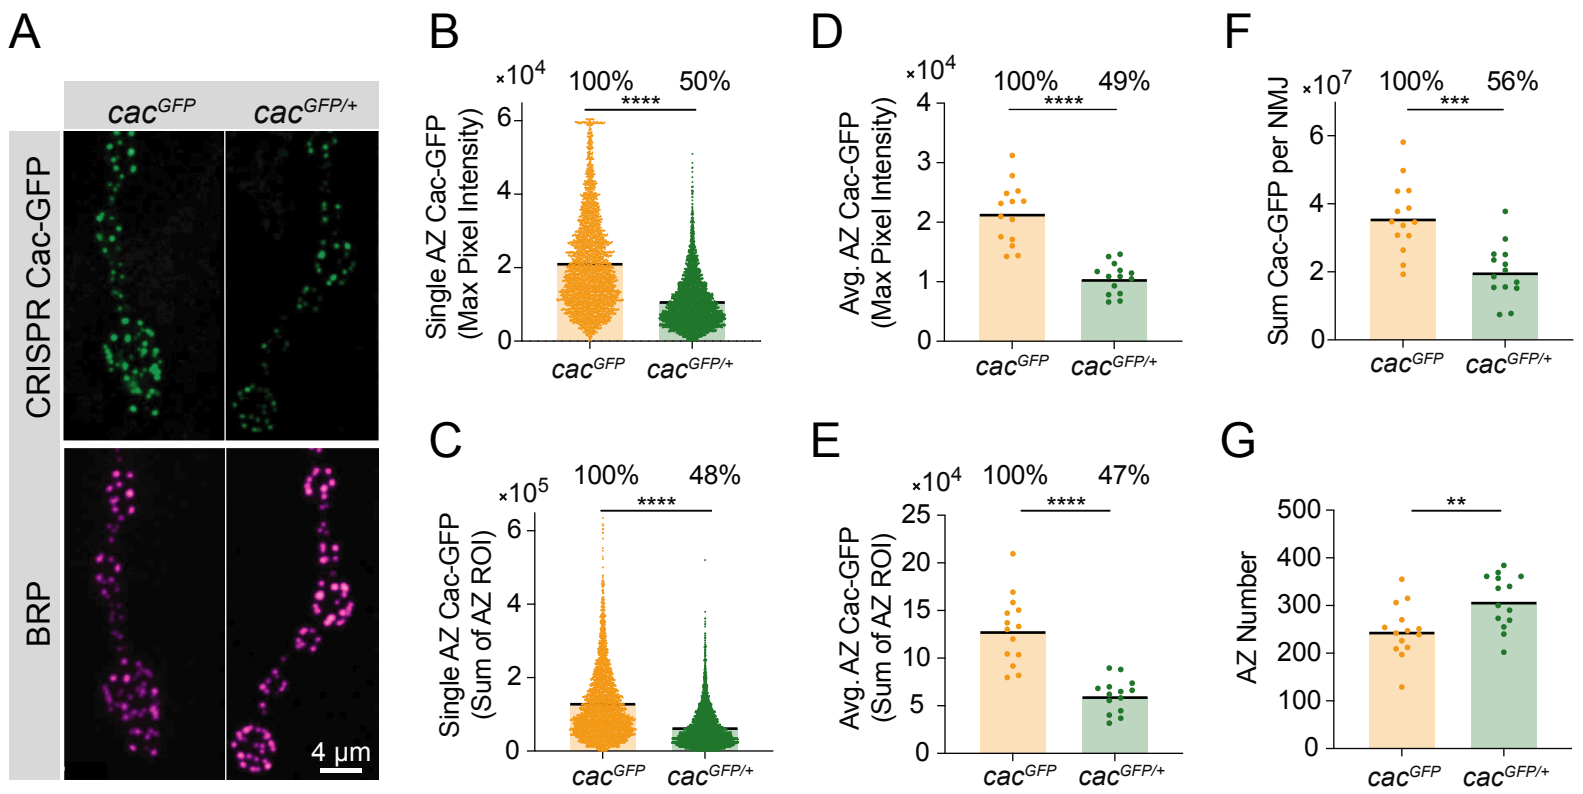

Supplement: supp [file elife-78648-supp-v1.zip]

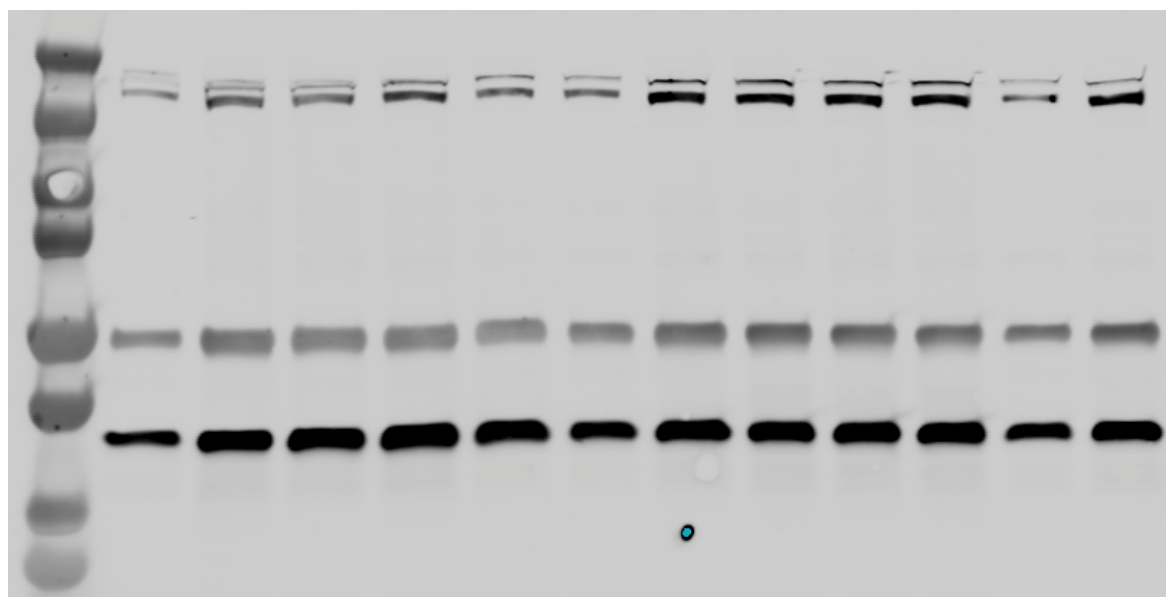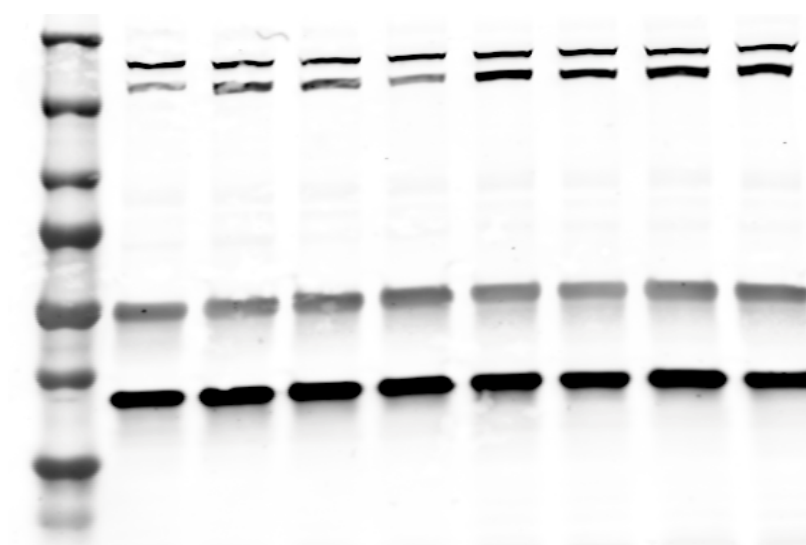

Supplement: supp [file elife-78648-supp-v1.zip]

Figure 7 - figure supplement 1

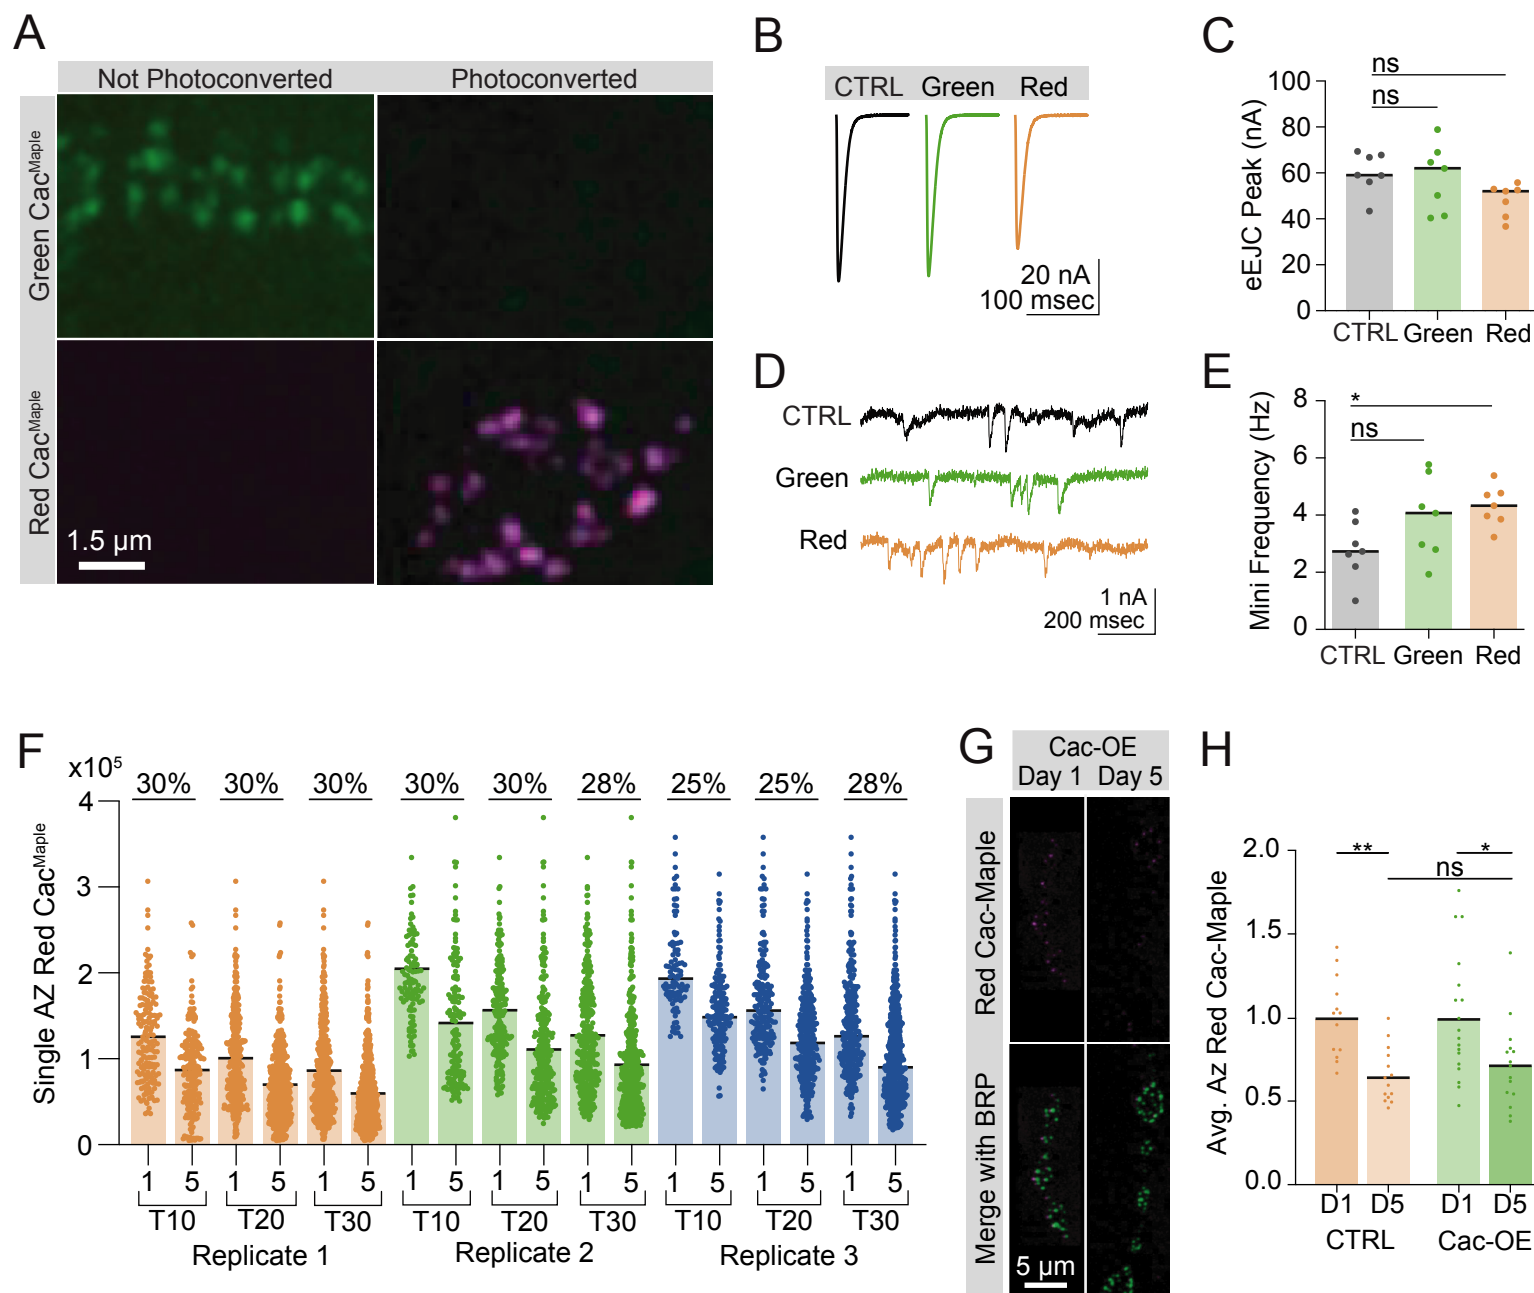

Supplement: supp [file elife-78648-supp-v1.zip]
